# Supplementary material
Source: publisher figshare collection journal article supplement (https://gsajournals.figshare.com/articles/dataset/_/16837087)
Supplement: Supplementary file 1 [file 1]

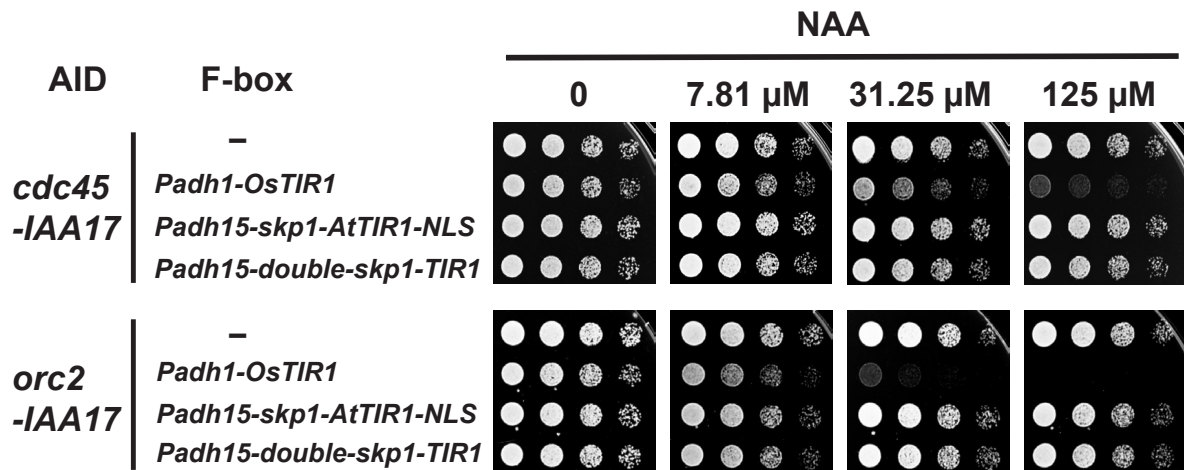

**Figure S3. *Padh1*-expressed OsTIR1 is more effective than the F-box proteins used in the Kanke system for disrupting the functions of *cdc45* and *orc2*.**

Spot assay showed that when combined with *cdc45-IAA17* or *orc2-IAA17*, the *Padh1-OsTIR1* cassette was more effective at causing NAA-dependent growth inhibition than the F-box-protein-expressing cassettes of the Kanke system.
