# Supplementary material
Source: publisher figshare collection journal article supplement (https://gsajournals.figshare.com/articles/dataset/_/16837087)
Supplement: Supplementary file 1 [file 1]

## Sheet: TableS3_NAA-vs-control
Systematic name	baseMean	log2FoldChange	lfcSE	stat	pvalue	padj	control-replicate-1	control-replicate-2	NAA-replicate-1	NAA-replicate-2	gene name	gene product description	chr	start coordinate	end coordinate	strand
SPCC569.05c	2824.05	2.20808	0.0730529	30.2257	1.08806e-200	5.56542e-197	974.782	1034.28	4562.75	4724.4	SPCC569.05c	plasma membrane spermidine family transmembrane transporter (predicted)	III	2424336	2426066	+
SPAC5H10.01	663.294	-3.10435	0.132912	-23.3565	1.18448e-120	3.0293e-117	1208.77	1168.02	131.599	144.783	dgc1	mitochondrial D-glutamate cyclase Dgc1 (predicted)	I	146974	147879	+
SPBP4G3.03	526.066	3.30753	0.156328	21.1576	2.34784e-99	4.00307e-96	94.8903	98.0779	1010.53	900.766	fub2	PI31 proteasome regulator Fub2 (predicted)	II	4453078	4453803	+
SPCC4B3.06c	653.16	2.54891	0.129468	19.6876	2.75618e-86	3.52447e-83	173.606	207.053	1092.18	1139.8	SPCC4B3.06c	NADPH-dependent FMN reductase (predicted)	III	1165188	1165790	+
SPAC1A6.03c	5853.24	1.00145	0.0584175	17.143	7.08977e-66	7.25283e-63	3825.81	3972.65	7868.1	7746.39	SPAC1A6.03c	lysophospholipase (predicted)	I	1070139	1072127	-
SPCC18B5.01c	3384.07	2.38027	0.140192	16.9787	1.18155e-64	1.00728e-61	1078.3	1102.63	5114.12	6241.23	bfr1	plasma membrane brefeldin A efflux transporter Bfr1	III	709415	714007	-
SPAPB1A11.01	282.199	5.30264	0.317371	16.708	1.146e-62	8.37396e-60	15.0962	12.8789	597.48	503.341	mfc1	prospore membrane copper transmembrane transporter Mfc1	I	2977811	2979298	+
SPCC663.03	1863.14	1.29262	0.0828286	15.606	6.62993e-55	4.23901e-52	1110.65	1050.13	2524.4	2767.4	pmd1	leptomycin transmembrane transporter Pmd1	III	1635974	1640062	+
SPCC584.16c	362.343	2.46119	0.16303	15.0965	1.70657e-51	9.699e-49	104.595	117.892	619.573	607.312	SPCC584.16c	Schizosaccharomyces specific protein	III	1524517	1525212	-
SPAC11D3.15	884.552	-1.46281	0.101253	-14.4471	2.61625e-47	1.33821e-44	1288.57	1307.71	472.605	469.331	SPAC11D3.15	5-oxoprolinase (ATP-hydrolizing) (predicted)	I	136331	140284	+
SPBC36.01c	285.873	2.74522	0.191408	14.3423	1.19062e-46	5.53639e-44	66.8545	81.2363	470.684	524.718	SPBC36.01c	spermidine family transmembrane transporter (predicted)	II	833162	834904	-
SPAC11D3.18c	553.532	-1.79818	0.128006	-14.0477	7.95771e-45	3.39197e-42	825.977	893.599	255.514	239.038	SPAC11D3.18c	carboxylic acid transmembrane transporter (predicted)	I	144862	146358	-
SPAC869.05c	1358.71	-1.17983	0.0878956	-13.4231	4.42883e-41	1.74257e-38	1812.62	1957.6	829.94	834.69	SPAC869.05c	plasma membrane sulfate transmembrane transporter (predicted)	I	5505900	5508422	+
SPAC1039.02	8530.93	-0.784757	0.0648837	-12.0948	1.12489e-33	4.10985e-31	10467	11123.4	5936.38	6596.87	SPAC1039.02	extracellular 5'-nucleotidase, human NT5E family (predicted)	I	5449717	5451522	+
SPAC1399.04c	3411.12	-0.849171	0.0705707	-12.0329	2.386e-33	8.13625e-31	4571.99	4202.49	2364.95	2505.04	uck2	uracil phosphoribosyltransferase Uck2	I	1840621	1841283	+
SPAPB24D3.07c	1197.76	1.07303	0.0914412	11.7347	8.46328e-32	2.7056e-29	737.557	805.428	1623.38	1624.68	SPAPB24D3.07c	Schizosaccharomyces pombe specific protein	I	2958024	2958926	-
SPBC1683.06c	1628.69	-0.941081	0.0804745	-11.6942	1.3653e-31	4.10795e-29	2170.62	2113.13	1091.22	1139.8	urh1	uridine ribohydrolase Urh1 (predicted)	II	151814	152746	-
SPBPB21E7.01c	888.618	1.19712	0.107295	11.1572	6.60026e-29	1.87558e-26	498.174	580.542	1270.85	1204.91	eno102	enolase (predicted)	II	58324	59646	-
SPAC11D3.14c	630.614	-1.23621	0.115173	-10.7335	7.08347e-27	1.90694e-24	896.067	874.776	377.508	374.104	SPAC11D3.14c	5-oxoprolinase (ATP-hydrolizing) (predicted)	I	131319	135101	-
SPBC1683.01	2254.15	0.783619	0.0733954	10.6767	1.30867e-26	3.34692e-24	1605.59	1706.95	2837.55	2866.51	SPBC1683.01	inorganic phosphate transmembrane transporter (predicted)	II	134303	136024	+
SPCC70.03c	7482.06	-0.611581	0.0573406	-10.6658	1.47179e-26	3.58486e-24	8823.72	9264.9	5838.4	6001.22	put1	proline dehydrogenase Put1 (predicted)	III	2350728	2352206	-
SPAC1039.09	1633.06	-0.947378	0.0890282	-10.6413	1.91396e-26	4.44995e-24	2083.27	2218.15	1194	1036.8	isp5	amino acid transmembrane transporter Isp5	I	5466778	5468520	+
SPAC1002.18	5914.43	-0.619761	0.0601328	-10.3065	6.58327e-25	1.46406e-22	7332.43	6999.2	4556.99	4769.1	urg3	DUF1688 family fungal conserved protein, implicated in uracil or riboflavin metabolism	I	1832457	1833656	+
SPAC521.03	9153.9	-0.54089	0.0529671	-10.2118	1.75536e-24	3.74111e-22	10866	10834.1	7482.91	7432.53	SPAC521.03	short chain dehydrogenase, human DHRS7 family(predicted)	I	845145	845924	+
SPAC140.02	2209.42	0.811122	0.079888	10.1532	3.20526e-24	6.55796e-22	1701.56	1507.82	2751.1	2877.2	gar2	nucleolar protein required for rRNA processing	I	1897523	1899025	+
SPACUNK4.17	1976.89	0.734148	0.0749269	9.79818	1.14632e-22	2.25516e-20	1500.99	1468.2	2501.35	2437.02	SPACUNK4.17	NAD binding dehydrogenase family protein, human DHDH ortholog, unknown biological role, implicated in carbohydrate metabolic process	I	2873032	2874252	-
SPBC1289.14	380.24	2.97889	0.308055	9.66999	4.04408e-22	7.66129e-20	66.8545	104.022	721.395	628.69	SPBC1289.14	adducin (predicted)	II	4412376	4413350	+
SPAC1002.17c	13034.9	-0.610646	0.0641814	-9.51438	1.82798e-21	3.33932e-19	16448.4	15058.4	9836.33	10796.6	urg2	uracil phosphoribosyltransferase (predicted)	I	1831012	1831626	-
SPBC16E9.16c	6330.09	0.515615	0.0578253	8.91678	4.80046e-19	8.46702e-17	5332.19	5090.15	7478.11	7419.9	lsd90	Lsd90 protein	II	1947985	1950255	-
SPAC1002.19	28871.8	-0.51213	0.0578354	-8.85497	8.37084e-19	1.42723e-16	34489.4	33397	22654.3	24946.5	urg1	GTP cyclohydrolase II Urg1 (predicted)	I	1835469	1836788	+
SPBC1683.05	2348.44	-0.63491	0.0729931	-8.69823	3.37107e-18	5.56226e-16	2900.62	2813.55	1781.87	1897.73	SPBC1683.05	plasma membrane uricil/uridine transmembrane transporter transmembrane transporter family (predicted)	II	148750	150429	+
SPBPB2B2.06c	2916.82	-0.612811	0.0707097	-8.66657	4.45323e-18	7.11821e-16	3494.77	3559.54	2405.29	2207.7	SPBPB2B2.06c	extracellular 5'-nucleotidase, human NT5E family (predicted)	II	4469200	4471005	-
SPAC186.08c	84.4814	3.05325	0.359992	8.48145	2.22404e-17	3.44727e-15	23.7226	12.8789	159.456	141.868	SPAC186.08c	L-lactate dehydrogenase (predicted)	I	5548884	5550012	-
SPAC4H3.08	2149.68	0.749604	0.0886756	8.45333	2.83108e-17	4.2591e-15	1571.08	1635.62	2932.65	2459.37	SPAC4H3.08	3-hydroxyacyl-CoA dehydrogenase (predicted)	I	3841581	3842441	+
SPBP4G3.02	23786.7	-0.445418	0.0532309	-8.36766	5.87755e-17	8.58962e-15	26758	28100.8	19686.1	20602	pho1	extracellular acid phosphatase Pho1	II	4447557	4448918	+
SPAC1399.03	734.156	-0.877962	0.106971	-8.20746	2.25926e-16	3.21003e-14	959.686	942.143	509.107	525.69	fur4	plasma membrane uracil transmembrane transporter	I	1841936	1843681	-
SPAPB1A11.03	1481.89	1.43234	0.177116	8.08701	6.11484e-16	8.45336e-14	774.219	828.214	2425.46	1899.67	SPAPB1A11.03	cytochrome b2 (L-lactate cytochrome-c oxidoreductase) (predicted)	I	2984786	2986009	+
SPBC428.11	3198.1	-0.508227	0.0663567	-7.65902	1.87358e-14	2.52194e-12	3701.8	3809.19	2583	2698.41	met17	homocysteine synthase Met17	II	465633	466922	+
SPAC1039.01	1560.88	-0.730725	0.0955061	-7.65108	1.99298e-14	2.61387e-12	1904.28	1991.28	1060.48	1287.5	SPAC1039.01	amino acid transmembrane transporter (predicted)	I	5445350	5447053	+
SPBC29B5.02c	3432.21	-0.582329	0.0793463	-7.33908	2.15066e-13	2.75016e-11	4381.13	3850.8	2602.21	2894.69	isp4	plasma membrane OPT oligopeptide transmembrane transporter family Isp4	II	1550434	1552791	-
SPBC2F12.14c	9541.84	0.413776	0.0568228	7.28187	3.29221e-13	4.10724e-11	7919.03	8445.6	11016.9	10785.9	gua1	IMP dehydrogenase Gua1	II	1706975	1708881	+
SPAC23E2.03c	599.921	-0.964195	0.133119	-7.24313	4.38431e-13	5.33947e-11	861.561	725.182	367.902	445.039	ste7	arrestin family meiotic suppressor protein Ste7	I	451210	452919	-
SPBC13A2.04c	218.955	-1.39945	0.194147	-7.20819	5.66985e-13	6.74449e-11	329.96	305.131	105.664	135.066	ptr2	plasma membrane PTR family peptide transmembrane transporter Ptr2	II	3405836	3407692	-
SPCC794.12c	14057.3	0.386282	0.0537213	7.19048	6.45618e-13	7.5053e-11	12083.4	12289.5	16354.8	15501.5	mae2	malic enzyme, malate dehydrogenase (oxaloacetate decarboxylating), Mae2	III	275514	277211	-
SPCC794.01c	4376.69	-0.55749	0.0784219	-7.10886	1.17005e-12	1.32995e-10	4993.6	5429.95	3820.22	3262.97	gcd1	glucose dehydrogenase Gcd1	III	239781	241208	-
SPBPB21E7.07	2546.16	-0.52357	0.0744285	-7.03454	1.99924e-12	2.22306e-10	2868.28	3137.5	2133.45	2045.43	aes1	phenazine biosynthesis PhzF protein family	II	70204	71094	+
SPAC869.10c	2242.75	-0.526376	0.074998	-7.01852	2.24223e-12	2.44022e-10	2641.83	2653.06	1916.35	1759.75	put4	plasma membrane proline transmembrane transporter Put4 (predicted)	I	5493222	5494880	+
SPAC977.15	56.433	3.02274	0.431809	7.00018	2.5563e-12	2.72406e-10	10.783	13.8696	89.3338	111.745	SPAC977.15	dienelactone hydrolase family, implicated in cellular detoxification	I	62989	63732	+
SPBC354.12	8274.48	0.441722	0.0633268	6.97527	3.0528e-12	3.18675e-10	7280.68	6755.49	9912.21	9149.53	gpd3	glyceraldehyde 3-phosphate dehydrogenase Gpd3	II	578731	579738	+
SPBC947.04	798.224	0.717067	0.103015	6.9608	3.38352e-12	3.46134e-10	596.299	611.253	993.239	992.106	pfl3	cell surface glycoprotein, flocculin Pfl3, DIPSY family	II	669740	672661	-
SPAC11D3.01c	659.712	0.801987	0.118166	6.78694	1.14535e-11	1.14872e-09	503.566	458.688	887.575	789.02	SPAC11D3.01c	Con-6 family conserved fungal protein	I	108908	109147	-
SPAC23H4.01c	2223.84	0.470149	0.0716176	6.56471	5.2133e-11	5.12808e-09	1884.87	1844.66	2578.19	2587.64	osh3	sterol transfer protein Osh3	I	1608162	1610999	+
SPBC29A10.08	7716.62	0.363668	0.0555652	6.54488	5.95427e-11	5.74643e-09	6797.6	6701	8837.33	8530.55	gas2	cell wall 1,3-beta-glucanosyltransferase Gas2	II	2554047	2555426	+
SPBPB21E7.09	1183.98	-0.573907	0.0892678	-6.42906	1.28399e-10	1.21623e-08	1380.22	1452.35	942.328	961.011	SPBPB21E7.09	L-asparaginase (predicted)	II	76318	77400	+
SPBC32C12.02	1611.85	-0.560025	0.0875605	-6.39586	1.59649e-10	1.48474e-08	1974.37	1867.44	1218.97	1386.62	ste11	DNA-binding transcription factor Ste11	II	3985586	3986992	+
SPAC17D4.01	8379.25	0.357901	0.0560474	6.38569	1.70624e-10	1.55847e-08	7295.77	7394.48	9646.13	9180.62	pex7	peroxin-7 (predicted)	I	4723018	4724400	+
SPAC1039.10	207.621	-1.25573	0.201829	-6.22177	4.91578e-10	4.41127e-08	265.262	319.992	136.402	108.83	mmf2	mitochondrial matrix protein, YjgF family protein Mmf2, reactive intermediate imine deaminase A homolog (predicted)	I	5470914	5471350	+
SPBP8B7.16c	1336.87	0.590813	0.095039	6.21653	5.08277e-10	4.48248e-08	1070.75	1063.01	1482.17	1731.57	dbp2	ATP-dependent RNA helicase Dbp2	II	3662854	3665301	-
SPAPB1A10.08	436.85	0.847962	0.137703	6.15789	7.37191e-10	6.39107e-08	318.098	306.122	596.52	526.661	SPAPB1A10.08	conserved fungal protein	I	1876259	1877581	+
SPBC16D10.08c	6980.22	-0.355579	0.0592871	-5.99758	2.00285e-09	1.68999e-07	7734.64	7937.38	6327.33	5921.54	hsp104	heat shock protein, disaggregase Hsp104	II	3612359	3615076	-
SPAC4A8.04	2652.91	-0.490524	0.081801	-5.99656	2.01544e-09	1.68999e-07	3345.96	2854.17	2182.44	2229.08	isp6	vacuolar serine protease Isp6	I	2545350	2546753	+
SPBC359.06	992.034	-0.575946	0.096309	-5.98018	2.22888e-09	1.83883e-07	1226.03	1149.2	813.61	779.303	mug14	adducin, involved in actin cytoskeleton organization	II	128825	129598	+
SPCC548.07c	1679.28	-1.02715	0.172999	-5.93733	2.89708e-09	2.35215e-07	1977.6	2528.23	1118.11	1093.16	ght1	plasma membrane high-affinity glucose:proton symporter Ght1	III	232834	234507	-
SPCC757.03c	3114.24	0.458804	0.077592	5.91303	3.35864e-09	2.68429e-07	2684.96	2561.91	3853.84	3356.25	hsp3101	glyoxylase III Hsp3101	III	47741	48475	-
SPAC13F5.03c	2023	-0.500549	0.0854633	-5.85688	4.71636e-09	3.71141e-07	2386.28	2354.86	1809.73	1541.12	gld1	mitochondrial glycerol dehydrogenase Gld1	I	2175008	2176360	-
SPBPB2B2.10c	1678.69	-0.49328	0.0844908	-5.83828	5.27434e-09	4.08761e-07	2039.06	1887.26	1457.2	1331.23	gal7	galactose-1-phosphate uridylyltransferase Gal7	II	4482569	4483678	-
SPCC63.14	3113.73	0.436372	0.0749477	5.82235	5.80242e-09	4.42976e-07	2624.58	2667.92	3356.26	3806.15	eis1	eisosome assembly protein eis1	III	862712	866266	+
SPAC3H1.06c	1794.43	-0.450482	0.0780964	-5.76828	8.00862e-09	6.02413e-07	2067.1	2077.47	1468.73	1564.44	SPAC3H1.06c	transmembrane transporter (predicted)	I	1941017	1942786	-
SPCC757.07c	4636.63	0.366675	0.0641584	5.71515	1.09606e-08	8.12512e-07	4157.92	3943.92	5382.12	5062.56	ctt1	catalase	III	56927	58465	-
SPAC19A8.16	473.629	0.7305	0.130482	5.59849	2.16224e-08	1.57998e-06	339.664	372.498	605.165	577.19	prl65	DUF2945 family protein	I	2472594	2472902	-
SPBC23G7.13c	1073.38	0.551661	0.0990548	5.56925	2.5584e-08	1.84313e-06	858.326	882.701	1190.16	1362.32	SPBC23G7.13c	plasma membrane urea transmembrane transporter (predicted)	II	2123260	2125254	-
SPAC9.10	7055.37	0.317071	0.057536	5.51083	3.57154e-08	2.53728e-06	6271.39	6294.82	7618.35	8036.93	thi9	plasma membrane thiamine/proton high affinity transmembrane transporter Thi9	I	1482834	1484609	+
SPCC31H12.06	875.545	0.547889	0.0999252	5.48299	4.18196e-08	2.93023e-06	705.208	717.257	1067.2	1012.51	mug111	major facilitator family transmembrane transporter Mug111 (predicted)	III	632248	633654	+
SPBC21C3.19	6837.55	0.323855	0.0594557	5.44699	5.12294e-08	3.54106e-06	6187.28	5959.97	7827.76	7375.2	rtc3	SBDS family protein Rtc3 (predicted)	II	3830167	3830487	+
SPCC965.06	2272.21	-0.453146	0.0836692	-5.41593	6.09716e-08	4.15826e-06	2567.43	2684.76	2067.17	1769.47	osr2	potassium channel, beta subunit, aldo-keto reductase (predicted)	III	2293287	2294321	+
SPACUNK4.15	1166.47	0.560672	0.104013	5.39039	7.03067e-08	4.73182e-06	911.163	973.845	1520.6	1260.29	SPACUNK4.15	2',3'-cyclic-nucleotide 3'-phosphodiesterase (predicted)	I	2881105	2881731	-
SPBC460.05	35.654	-2.7604	0.514207	-5.36825	7.95024e-08	5.28123e-06	53.915	70.3387	8.64521	9.717	SPBC460.05	transmembrane transporter (predicted)	AB325691	16470	18062	+
SPAC9E9.09c	7071.67	-0.318271	0.0596719	-5.33368	9.62443e-08	6.3114e-06	8139	7558.94	6263.94	6324.79	atd1	aldehyde dehydrogenase (predicted)	I	4453560	4455071	-
SPBC1861.06c	419.603	-0.769171	0.144358	-5.32821	9.91871e-08	6.42205e-06	545.619	512.185	278.568	342.038	mug131	UPF0300 family protein 4	II	4142843	4144144	-
SPAC1565.01	3383.32	0.337718	0.0636895	5.30256	1.14187e-07	7.30084e-06	2979.34	2998.81	3763.55	3791.57	rcf2	cytochrome c oxidase assembly protein Rcf2	I	1291278	1292006	+
SPCC13B11.01	33701.7	-0.257973	0.0489422	-5.27097	1.35703e-07	8.56937e-06	36565.1	36848.6	31205.4	30187.8	adh1	alcohol dehydrogenase Adh1	III	1591359	1592411	+
SPAC186.05c	195.459	1.06493	0.204245	5.21398	1.84829e-07	1.15292e-05	107.83	144.64	269.923	259.444	gdt1	Golgi calcium and manganese antiporter Gdt1	I	5540350	5541138	-
SPAC23D3.12	1266.68	-0.521655	0.100139	-5.2093	1.89553e-07	1.16815e-05	1531.18	1455.32	941.367	1138.83	SPAC23D3.12	plasma membrane inorganic phosphate transmembrane transporter (predicted)	I	4362901	4364580	+
SPCC965.12	323.732	-0.781741	0.153152	-5.10434	3.31953e-07	2.02135e-05	393.579	425.004	233.421	242.925	dpe2	dipeptidyl peptidase, unknown specificity, implicated in glutathione metabolism (predicted)	III	2306292	2307542	+
SPAC869.11	545.947	0.659318	0.130104	5.06762	4.02819e-07	2.42402e-05	392.501	453.734	712.75	624.803	cat1	plasma membrane arginine/lysine amino acid transmembrane transporter Cat1	I	5489385	5491148	-
SPAC343.12	10037.6	0.273351	0.0541938	5.04395	4.56014e-07	2.71222e-05	9031.83	9147.01	11215.7	10755.7	rds1	ferritin related conserved fungal protein	I	1668071	1669279	+
SPAC26H5.10c	6466.48	0.291251	0.0578029	5.03869	4.68733e-07	2.75583e-05	5690.18	5941.15	7203.38	7031.22	tif51	translation elongation and termination factor eIF5A (predicted)	I	4141740	4142213	-
SPBC2G5.06c	4642.07	-0.297528	0.0603166	-4.93277	8.10714e-07	4.71228e-05	5060.46	5177.33	4103.59	4226.89	hmt2	sulfide-quinone oxidoreductase	II	2589100	2590479	-
SPAC1556.04c	778.721	-0.513529	0.104227	-4.92702	8.34923e-07	4.79846e-05	913.319	918.366	623.416	659.784	cdd1	cytidine deaminase Ccd1 (predicted)	I	3800313	3800938	-
SPCC569.04	97.622	1.34387	0.27515	4.88413	1.03886e-06	5.9042e-05	52.8367	57.4598	138.323	141.868	SPCC569.04	Schizosaccharomyces pombe specific protein	III	2427219	2427584	-
SPCP31B10.06	1282.13	0.43277	0.0886984	4.87912	1.06563e-06	5.98977e-05	1069.67	1112.54	1416.85	1529.46	tcb2	tricalbin, C2 domain protein (phospholipid binding) ER-plasma membrane tethering protein Tcb2 (predicted)	III	533322	536888	+
SPBPB2B2.08	164.026	-1.08364	0.228358	-4.74534	2.08158e-06	0.000115731	193.016	252.625	118.151	92.3115	SPBPB2B2.08	conserved fungal protein	II	4476012	4476674	+
SPCC1442.16c	2257.89	-0.361469	0.0767023	-4.71262	2.44557e-06	0.000134507	2475.77	2602.53	2066.21	1887.04	zta1	NADPH quinone oxidoreductase/ARE-binding protein (predicted)	III	1794979	1795968	-
SPAC1B3.16c	8952.49	0.253503	0.0540531	4.68989	2.73354e-06	0.000148745	8291.04	8045.36	9677.83	9795.71	vht1	plasma membrane vitamin H transmembrane transporter Vht1	I	4959094	4960800	-
SPAC4F10.17	182.269	0.93677	0.20385	4.59538	4.31954e-06	0.000232573	113.221	136.715	243.987	235.151	SPAC4F10.17	conserved fungal protein	I	4868588	4868959	+
SPCC1235.14	21855	-0.284441	0.062408	-4.55776	5.17019e-06	0.000275474	23072.4	24931.6	18726.5	20689.4	ght5	plasma membrane high-affinity glucose/fructose:proton symporter Ght5	III	212313	213953	+
SPAPB15E9.01c	4193.92	-0.321471	0.0707067	-4.54653	5.45366e-06	0.000287582	4720.79	4597.78	3500.35	3956.76	pfl2	cell surface glycoprotein, flocculin Pfl2	I	3987239	3990349	-
SPBPB7E8.02	925.944	-0.451115	0.100129	-4.50535	6.62634e-06	0.000345854	1102.02	1037.25	749.252	815.256	SPBPB7E8.02	PSP1 family protein	II	3499132	3501381	+
SPAC139.05	505.05	0.572516	0.127373	4.49481	6.96326e-06	0.000359769	430.241	382.405	610.928	596.624	SPAC139.05	succinate-semialdehyde dehydrogenase (predicted)	I	1028316	1029797	+
SPAC1039.07c	780.766	-0.469049	0.105005	-4.46691	7.93593e-06	0.000405923	918.711	894.59	679.129	630.633	SPAC1039.07c	aminotransferase class-III, possible transaminase, unknown specificity, implicated in amino acid or cofactor metabolism	I	5462443	5463789	-
SPAC22H10.13	1344.14	0.923761	0.206976	4.46314	8.07661e-06	0.000409028	855.091	1000.59	1977.83	1543.06	zym1	metallothionein Zym1	I	2381730	2381882	+
SPAC750.03c	23.8683	2.88968	0.647967	4.45961	8.21089e-06	0.000411752	5.3915	5.94412	34.5808	49.5567	SPAC750.03c	methyltransferase (predicted)	I	5562608	5563045	-
SPAC8E11.10	1245.7	0.432521	0.0976338	4.43003	9.42191e-06	0.000467894	1082.61	1038.24	1316.95	1545	SPAC8E11.10	sorbose reductase (predicted)	I	3373217	3373984	-
SPCC1795.11	5567.78	0.259094	0.0585439	4.42563	9.61604e-06	0.000469457	5172.6	4966.31	6080.46	6051.75	sum3	translation initiation RNA helicase Sum3	III	974761	976671	-
SPBC1683.08	4226.68	-0.283561	0.0640793	-4.42516	9.63694e-06	0.000469457	4487.88	4792.94	3861.53	3764.37	ght4	plasma membrane hexose:proton symporter, unknown specificity Ght4	II	157555	159228	+
SPBP19A11.01	8133.94	-0.24294	0.0555286	-4.37505	1.21405e-05	0.000585836	8957.43	8677.42	7562.64	7338.28	gcv3	glycine decarboxylase complex subunit H (predicted)	II	2848523	2849032	+
SPBC4F6.09	2223.31	-0.342054	0.078864	-4.33726	1.4427e-05	0.000689664	2580.37	2391.52	2051.8	1869.55	str1	plasma membrane siderophore-iron transmembrane transporter Str1	II	2705523	2707361	+
SPBC4F6.17c	3442.69	-0.293792	0.0679493	-4.3237	1.53433e-05	0.000726677	3823.65	3760.65	3220.82	2965.63	hsp78	mitochondrial heatshock protein Hsp78 (predicted)	II	2723235	2725646	-
SPAC31G5.11	1893.5	0.328638	0.0764514	4.29866	1.71837e-05	0.000806374	1726.36	1631.66	2116.16	2099.84	pac2	cAMP-independent regulatory protein Pac2	I	3006138	3006845	+
SPCC757.13	642.585	-0.496738	0.115927	-4.28492	1.82805e-05	0.000850042	788.237	716.266	513.91	551.926	SPCC757.13	dipeptide transmembrane transporter (predicted)	III	78044	79612	+
SPAC22G7.08	527.155	0.526088	0.122895	4.28078	1.86241e-05	0.00085822	445.338	419.06	633.022	611.199	ppk8	serine/threonine protein kinase Ppk8 (predicted)	I	749930	751588	+
SPAC27D7.11c	4078.63	0.337819	0.0792452	4.26295	2.01745e-05	0.000921362	3395.56	3810.18	4863.41	4245.36	SPAC27D7.11c	But2 family protein, similar to cell surface molecules	I	4529462	4530853	-
SPAC27F1.05c	436.486	-0.575521	0.135373	-4.25136	2.12476e-05	0.000961782	492.783	551.812	354.454	346.897	SPAC27F1.05c	aminotransferase class-III, unknown specificty	I	4323652	4325106	-
SPCC417.10	384.261	-0.605172	0.142606	-4.24366	2.19904e-05	0.000986672	450.729	476.52	289.134	320.661	dal51	dipeptide transmembrane transporter Dal5h1 (predicted)	III	1695726	1697252	+
SPAP7G5.06	884.388	-0.420465	0.10002	-4.20381	2.62458e-05	0.00116737	981.252	1043.19	740.606	772.501	per1	plasma membrane amino acid transmembrane transporter Per1	I	3749695	3751446	+
SPCC191.07	3292.38	0.27334	0.0651752	4.19393	2.74167e-05	0.00120893	2918.96	3043.39	3603.13	3604.03	cyc1	cytochrome c	III	1714735	1715064	+
SPAC57A10.12c	862.463	0.423498	0.101146	4.18699	2.8268e-05	0.00122535	707.364	765.8	985.554	991.134	ura3	mitochondrial dihydroorotate dehydrogenase Ura3	I	1385510	1386841	-
SPBC660.16	34334.7	-0.207154	0.0494715	-4.18734	2.82249e-05	0.00122535	36414.2	37176.5	32429.1	31318.9	gnd1	phosphogluconate dehydrogenase, decarboxylating	II	230368	233061	+
SPBPB7E8.01	787.968	-0.428309	0.103327	-4.14517	3.3956e-05	0.00145954	904.693	903.506	687.775	655.897	SPBPB7E8.01	Schizosaccharomyces specific protein, predicted GPI anchor	II	3494517	3496226	+
SPAC977.16c	1027.17	0.472085	0.114208	4.13354	3.57211e-05	0.00152261	762.357	957.994	1267	1121.34	dak2	dihydroxyacetone kinase Dak2	I	64904	66679	-
SPBC24C6.09c	1249.65	0.361446	0.0875281	4.12949	3.63575e-05	0.00153693	1089.08	1098.67	1366.9	1443.95	SPBC24C6.09c	phosphoketolase family protein (predicted)	II	2335262	2337739	-
SPAC806.11	3239.64	0.265722	0.0646836	4.10802	3.99062e-05	0.00167312	2932.97	2951.25	3578.16	3496.18	SPAC806.11	dubious	I	237212	237430	-
SPAC1F7.08	537.553	-0.520131	0.128269	-4.05499	5.01356e-05	0.00208491	629.727	637.011	402.483	480.991	fio1	plasma membrane iron transport multicopper oxidase Fio1	I	4235639	4237507	+
SPAC926.04c	31405.8	-0.199051	0.049127	-4.05177	5.08317e-05	0.00209681	34024.6	33113.7	28930.7	29554.3	hsp90	Hsp90 chaperone	I	3888774	3890888	-
SPACUNK4.10	4160.28	-0.248295	0.0615689	-4.0328	5.51167e-05	0.00225538	4495.43	4539.32	3869.21	3737.16	gor1	glyoxylate reductase (predicted)	I	2891216	2892527	-
SPAC19E9.03	2586.37	-0.285034	0.0709402	-4.01795	5.87071e-05	0.00238323	2872.59	2809.59	2256.4	2406.9	pas1	cyclin Pas1	I	1362571	1363806	+
SPAC15E1.02c	914.78	0.422341	0.106334	3.97184	7.13192e-05	0.00283834	772.062	791.558	1130.6	964.898	SPAC15E1.02c	DUF1761 family protein	I	3721310	3721756	-
SPBC839.15c	42968.9	0.1913	0.0481747	3.97096	7.15827e-05	0.00283834	40719.8	39529.4	45816.7	45809.8	tef103	translation elongation factor EF-1 alpha Ef1a-c	II	626106	627488	-
SPAC24C9.08	5905.69	-0.243392	0.0612451	-3.97407	7.06552e-05	0.00283834	6207.77	6596.98	5532.93	5285.08	cps1	vacuolar carboxypeptidase (predicted)	I	3061611	3063401	+
SPBC106.03	1899.22	-0.299271	0.0757812	-3.94915	7.84282e-05	0.00308585	2142.58	2048.74	1701.19	1704.36	SPBC106.03	mitochondrial Rossman fold DUF1776 family protein	II	378627	379700	+
SPBC56F2.15	1273.38	0.379211	0.0962509	3.93982	8.15422e-05	0.00317266	1024.38	1188.82	1493.7	1386.62	tam13	Schizosaccharomyces specific protein Tam13	II	4103472	4103759	-
SPAPB18E9.05c	1271.42	-0.388117	0.0985357	-3.93884	8.18751e-05	0.00317266	1449.23	1433.52	999.963	1202.96	SPAPB18E9.05c	Schizosaccharomyces pombe specific protein	I	3986648	3986920	-
SPCC320.03	1324.9	0.402425	0.102402	3.92986	8.49942e-05	0.00326876	1146.23	1136.32	1349.61	1667.44	SPCC320.03	DNA-binding transcription factor (predicted)	III	165922	168525	-
SPAC6B12.04c	863.709	-0.389624	0.0993208	-3.92289	8.74937e-05	0.00333978	970.469	988.705	736.764	758.898	SPAC6B12.04c	2-aminoadipate transaminase/kynurenine-oxoglutarate transaminase (predicted)	I	2416782	2418047	-
SPAC29B12.14c	1271.41	0.339066	0.0864875	3.92041	8.83999e-05	0.00334937	1099.87	1145.23	1403.41	1437.14	SPAC29B12.14c	plasma membrane purine transmembrane transporter (predicted)	I	5439849	5441621	-
SPBPB10D8.02c	270.073	-0.689615	0.176157	-3.91477	9.04903e-05	0.00340337	303.002	363.582	188.273	225.434	SPBPB10D8.02c	arylsulfatase (predicted)	II	83767	85431	-
SPAC1786.02	1685.78	-0.331062	0.0846383	-3.91149	9.17293e-05	0.00342478	1916.14	1840.7	1406.29	1579.98	SPAC1786.02	phospholipase (predicted)	I	3034882	3036816	+
SPBC56F2.08c	706.877	0.420744	0.107883	3.9	9.61917e-05	0.00356537	616.787	592.43	804.005	814.284	puf1	pumilio family RNA-binding protein Puf1	II	4096945	4098930	+
SPBC1861.05	589.156	-0.492071	0.126503	-3.88981	0.000100324	0.00369176	711.677	665.741	442.827	536.378	SPBC1861.05	bifunctional pseudouridylate synthase/pseudouridine kinase (predicted)	II	4140551	4142794	+
SPBC3H7.02	2648.52	0.294692	0.0761786	3.86844	0.000109534	0.0040019	2371.18	2386.56	2744.37	3091.95	SPBC3H7.02	sulfate transmembrane transporter (predicted)	II	1884365	1886998	-
SPBC317.01	162.246	0.822909	0.213555	3.85339	0.000116496	0.00422607	116.456	117.892	192.116	222.519	mbx2	DNA-binding transcription factor, MADS-box Pvg4	II	3626639	3627757	+
SPAC27D7.09c	526.183	0.485696	0.12611	3.85136	0.000117464	0.0042312	456.121	421.042	644.548	583.02	SPAC27D7.09c	But2 family protein, similar to cell surface molecules	I	4523388	4524539	-
SPAC4G9.20c	786.483	-0.403178	0.105098	-3.8362	0.000124954	0.00446952	877.735	913.413	651.273	703.511	ymc1	mitochondrial carrier, glutamate/glycine (predicted)	I	2288689	2289986	-
SPAC13G6.10c	4609.58	0.252013	0.06608	3.81376	0.000136869	0.00486171	4311.04	4105.4	4802.89	5219	asl1	cell wall protein Asl1, predicted O-glucosyl hydrolase	I	192296	193888	-
SPCC622.09	8461.31	0.215236	0.0565116	3.80871	0.000139695	0.00492786	7647.3	8014.65	9244.61	8938.67	htb1	histone H2B Htb1	III	1412484	1412864	+
SPBP4H10.11c	1280.6	-0.331786	0.0873871	-3.79673	0.000146616	0.00513659	1469.72	1384.98	1113.31	1154.38	lcf2	long-chain-fatty-acid-CoA ligase	II	2892339	2894408	-
SPAC13G6.06c	6870.93	-0.268411	0.0709317	-3.78408	0.000154278	0.00536823	7692.59	7324.14	5785.57	6681.41	gcv2	glycine cleavage complex subunit P (predicted)	I	182976	186071	-
SPBC1347.02	876.531	0.378982	0.100538	3.76954	0.00016355	0.00565242	775.297	748.959	957.697	1024.17	ani1	CENP-A amino terminus domain (NTD) isomerase Ani1	II	4064557	4065642	+
SPAC1F8.02c	930.474	0.430221	0.114422	3.75995	0.000169948	0.00583412	730.008	854.962	1161.34	975.587	shu1	cell-surface heme acquisition protein Shu1	I	85598	86278	-
SPAC23C11.05	7476.16	-0.207823	0.0553546	-3.7544	0.000173757	0.0059251	7897.46	8129.57	6986.29	6891.3	ipp1	inorganic pyrophosphatase Ipp1 (predicted)	I	2140529	2141398	+
SPCC1235.01	28436.9	0.235403	0.0628064	3.74807	0.000178202	0.00599674	25171.8	27071.5	32432	29072.3	SPCC1235.01	Schizosaccharomyces specific protein	III	174183	176159	+
SPCC70.12c	491.533	-0.4758	0.1269	-3.74941	0.000177253	0.00599674	593.064	550.822	403.443	418.803	ecl1	extender of the chronological lifespan protein Ecl1	III	2355545	2355787	-
SPCC320.14	422.138	-0.503697	0.134754	-3.73792	0.000185552	0.00620327	493.861	496.334	361.178	337.18	sry1	serine racemase Sry1	III	139222	140193	-
SPAC5D6.01	2619	0.263374	0.070905	3.71446	0.000203639	0.00676373	2295.7	2464.83	2857.72	2857.77	rps2202	40S ribosomal protein S15a (predicted)	I	1511797	1512189	-
SPAC17A2.09c	1024.44	-0.354445	0.095537	-3.71003	0.000207234	0.00683871	1171.03	1128.39	862.6	935.747	csx1	RNA-binding protein Csx1	I	3570447	3572345	-
SPBC26H8.08c	1154.08	0.330191	0.0892684	3.69886	0.000216573	0.00710111	1029.78	1015.45	1262.2	1308.88	grn1	GTPase Grn1	II	3966700	3968155	-
SPAC890.05	371.925	0.532041	0.143952	3.69595	0.000219063	0.007137	319.177	289.28	432.261	446.982	pxr1	ribosome biogenesis protein, G-patch domain, PINX1 family Pxr1 (predicted)	I	5009807	5010661	+
SPAC1002.13c	754.427	0.44233	0.120132	3.68204	0.000231371	0.00749029	595.221	683.574	792.478	946.436	psu1	cell wall beta-glucosidase Psu1 (predicted)	I	1821936	1823189	-
SPAPB8E5.03	4365.61	0.236542	0.0643159	3.67781	0.000235245	0.00756778	3898.05	4118.28	4596.37	4849.75	mae1	plasma membrane malate/succinate:proton symporter Mae1	I	4912297	4913613	+
SPBC31E1.06	554.655	0.437217	0.118954	3.6755	0.000237384	0.00758887	466.903	475.529	641.667	634.52	bms1	GTP binding protein Bms1 (predicted)	II	249087	252499	+
SPAC23H3.15c	6807.05	0.671369	0.18357	3.6573	0.000254889	0.00809788	5072.32	5429.95	9393.5	7332.45	ddr48	DNA damage-responsive protein DDr48 (predicted)	I	2523629	2524606	-
SPAC17A2.01	6031.2	0.227901	0.0624941	3.64676	0.000265568	0.00838507	5392.57	5718.24	6293.71	6720.28	bsu1	plasma membrane high-affinity import carrier for pyridoxine, pyridoxal, and pyridoxamine Bsu1	I	3550152	3551732	+
SPAC664.06	880.384	0.359836	0.099233	3.62617	0.000287657	0.00902678	750.496	791.558	996.12	983.36	rlp7	ribosomal protein L7-like Rlp7 involved in ribosome biogenesis (predicted)	I	1712817	1713783	+
SPBC11C11.05	252.348	0.631256	0.174752	3.61229	0.000303499	0.00946584	205.955	190.212	328.518	284.708	SPBC11C11.05	cell wall 1,6-beta-glucan biosynthesis protein, KRE9 family (predicted)	II	3357779	3358633	+
SPCC191.11	2177.73	-0.265587	0.074118	-3.5833	0.000339281	0.0105177	2456.37	2299.38	1982.63	1972.55	inv1	external invertase, beta-fructofuranosidase Inv1	III	1724306	1726051	+
SPAC9E9.13	7287.76	-0.195451	0.0547212	-3.57176	0.00035459	0.0109261	7812.28	7749.15	6765.36	6824.25	wos2	p23 homolog, predicted co-chaperone Wos2	I	4468236	4468995	-
SPBC1271.07c	662.732	-0.414193	0.116083	-3.56809	0.00035959	0.0110138	750.496	763.819	527.358	609.256	SPBC1271.07c	N-acetyltransferase (predicted)	II	358855	359346	+
SPBC12C2.04	3397.48	0.251396	0.0706	3.56086	0.000369648	0.0111976	3041.88	3162.27	3871.13	3514.64	SPBC12C2.04	NAD binding dehydrogenase family protein	II	2469061	2470215	-
SPBC1773.02c	2184.05	-0.268345	0.0753645	-3.56063	0.000369968	0.0111976	2378.73	2394.49	2064.28	1898.7	bcp1	thioredoxin peroxidase Bcp1	II	283938	284525	-
SPBP16F5.08c	3245.06	-0.23226	0.0653443	-3.5544	0.000378843	0.0113987	3464.57	3546.66	3034.47	2934.53	fmo1	ER flavin-containing N,N-dimethylaniline monooxygenase activity Fmo1 (predicted)	II	1912136	1913479	-
SPAC17G6.03	555.191	-0.423475	0.119588	-3.5411	0.000398455	0.0119187	636.196	636.021	488.935	459.614	SPAC17G6.03	extracellular 5'-nucleotidase, human NT5E family (predicted)	I	3593055	3594962	+
SPBC244.02c	351.125	0.556817	0.157851	3.52748	0.000419529	0.0123327	320.255	248.662	426.497	409.086	utp6	U3 snoRNP-associated protein Utp6 (predicted)	II	4357993	4359459	+
SPAC222.06	350.278	0.51945	0.147245	3.52781	0.000419019	0.0123327	296.532	279.374	399.601	425.605	mak16	nuclear HMG-like acidic protein Mak16 (predicted)	I	953113	954074	+
SPCC285.05	155.642	-0.762756	0.216068	-3.53017	0.000415296	0.0123327	200.564	191.202	123.915	106.887	SPCC285.05	purine nucleoside transmembrane transporter (predicted)	III	1802662	1803708	+
SPBC16G5.02c	971.275	-0.332339	0.0946341	-3.51184	0.000445024	0.0130074	1094.47	1070.93	857.797	861.898	rbk1	ribokinase Rbk1 (predicted)	II	4216147	4217103	-
SPCC1322.14c	976.905	-0.335715	0.0958342	-3.50308	0.00045991	0.0133661	1120.35	1060.03	877.969	849.266	vtc4	vacuolar transporter chaperone (VTC) complex subunit (predicted)	III	1318425	1320590	-
SPCC622.12c	17367.5	-0.192689	0.0550402	-3.50087	0.000463734	0.0134011	18292.3	18758.6	16774.6	15644.4	gdh1	NADP-specific glutamate dehydrogenase Gdh1 (predicted)	III	1419457	1420812	-
SPBC1773.04	1281.97	-0.301542	0.086637	-3.48052	0.000500441	0.0143806	1381.3	1449.37	1166.14	1131.06	SPBC1773.04	methylglyoxyl reductase (NADPH-dependent) (predicted)	II	289625	290635	+
SPAC1F8.01	790.981	-0.37387	0.10805	-3.46016	0.00053986	0.0154267	885.284	900.534	734.843	643.265	ght3	plasma membrane gluconate:proton symporter Ght3	I	82936	84603	+
SPAC27E2.11c	21294.1	0.173404	0.0503949	3.4409	0.000579772	0.0163842	19824.5	20207	22940.5	22204.3	SPAC27E2.11c	Schizosaccharomyces specific protein	I	4009573	4009818	-
SPAC20G8.03	5111.6	-0.226093	0.0656947	-3.44157	0.000578358	0.0163842	5743.02	5280.36	4576.2	4846.84	itr2	myo-inositol transmembrane transporter	I	1393896	1395569	+
SPAC25G10.09c	1495.67	0.306864	0.0892212	3.43936	0.000583085	0.0163873	1347.87	1326.53	1543.65	1764.61	pan1	actin cortical patch component, with EF hand and WH2 motif Panl (predicted)	I	4313221	4318605	-
SPAC513.02	335.842	0.520548	0.152497	3.41349	0.000641362	0.0179266	296.532	255.597	395.759	395.482	SPAC513.02	phosphoglycerate mutase/6-phosphofructo-2-kinase family	I	2911719	2912369	+
SPAC20G8.09c	504.809	0.423067	0.124103	3.40899	0.000652039	0.018126	436.711	425.995	569.623	586.907	nat10	rRNA/tRNA cytidine N-acetyltransferase	I	1415542	1418750	-
SPCC1442.04c	894.724	0.368091	0.108269	3.39977	0.000674432	0.0186471	822.742	740.043	937.525	1078.59	SPCC1442.04c	meiotic recombination protein (predicted)	III	1773925	1775429	-
SPCC1739.06c	1441.65	-0.284268	0.0839702	-3.38534	0.000710891	0.0195495	1548.44	1617.79	1335.2	1265.15	met1	uroporphyrin methyltransferase Met1	III	2037952	2039442	-
SPAC56F8.03	2213.27	0.245944	0.0727984	3.37843	0.000729023	0.0199409	1972.21	2077.47	2408.17	2395.24	tif52	translation initiation factor eIF5B Tif52 (predicted)	I	1129548	1132787	+
SPBC23E6.01c	788.612	-0.360666	0.106869	-3.37483	0.000738623	0.0200961	836.76	936.199	694.499	686.992	cxr1	splicing factor Cxr1	II	3835843	3837264	-
SPBC215.06c	140.79	0.754227	0.224409	3.36094	0.000776763	0.0210219	104.595	105.013	180.589	172.963	SPBC215.06c	nucleolar RNA-binding protein, human LYAR homolog, implicated in transcriptional regulation	II	4038119	4038752	-
SPBC2D10.04	1010.25	0.320906	0.095544	3.35872	0.00078304	0.0210803	926.259	870.813	1150.77	1093.16	aly2	arrestin Aly1 related Aly2	II	2972196	2974172	+
SPBC19C2.07	35818.4	-0.162301	0.0484311	-3.35118	0.000804682	0.0215495	38048.9	37613.4	33359	34252.4	fba1	fructose-bisphosphate aldolase Fba1	II	1688367	1689443	+
SPBC19C2.05	325.488	-0.56916	0.169926	-3.34947	0.000809675	0.0215703	430.241	347.731	231.5	292.482	pat1	serine/threonine protein kinase Ran1/Pat1	II	1682861	1684273	+
SPCC663.09c	1228.41	-0.28929	0.0866357	-3.33915	0.000840347	0.0222714	1350.03	1352.29	1115.23	1096.08	SPCC663.09c	short chain dehydrogenase, unknown specificity (predicted)	III	1649528	1650289	-
SPBC8E4.04	2236.29	0.241613	0.0726628	3.32512	0.000883804	0.0233024	2000.24	2098.27	2451.4	2395.24	SPBC8E4.04	alditol NADP+ 1-oxidoreductase activity (predicted)	II	4432418	4433395	-
SPBPB21E7.11	86.733	0.971676	0.292931	3.31709	0.000909617	0.0237048	49.6018	67.3667	112.388	117.576	SPBPB21E7.11	Schizosaccharomyces pombe specific protein	II	62256	62956	-
SPBC3H7.06c	1313.72	0.297404	0.0896363	3.3179	0.00090698	0.0237048	1152.7	1204.67	1519.64	1377.87	pof9	F-box protein Pof9	II	1871847	1873320	+
SPBC1683.07	2020.45	-0.257423	0.0776292	-3.31606	0.000912973	0.0237048	2246.1	2154.74	1915.39	1765.58	mal1	maltase alpha-glucosidase Mal1	II	153562	155301	+
SPBC3E7.02c	7376.99	0.228972	0.0691391	3.31176	0.000927111	0.0239504	6898.96	6687.13	8512.65	7409.21	hsp16	heat shock protein Hsp16	II	2660490	2660921	-
SPBC1773.06c	283.652	0.545704	0.16512	3.3049	0.000950102	0.024421	241.539	219.932	357.335	315.802	adh8	alcohol dehydrogenase (predicted)	II	293466	294506	-
SPBC428.02c	7851.57	-0.18133	0.0549053	-3.30259	0.000957951	0.0244996	8219.87	8468.39	7328.26	7389.78	eca39	branched chain amino acid aminotransferase Eca39	II	442631	443914	-
SPBC1604.04	2354.57	0.267971	0.0813691	3.29328	0.000990259	0.0251999	1976.52	2295.42	2584.92	2561.4	SPBC1604.04	mitochondrial carrier, thiamine pyrophosphate (predicted)	II	3924320	3925310	-
SPCC548.06c	7683.56	0.182479	0.0555842	3.28294	0.0010273	0.0260132	7063.94	7332.07	8217.75	8120.5	ght8	plasma membrane hexose:proton symporter, unknown specificity Ght8 (predicted)	III	226757	228400	-
SPAC2F3.09	5966.45	-0.18775	0.0572804	-3.27773	0.00104647	0.0263678	6298.34	6409.74	5651.09	5506.62	hem1	5-aminolevulinate synthase Hem1	I	3940263	3941939	+
SPAC7D4.12c	489.375	0.429442	0.131201	3.27315	0.00106355	0.026667	429.163	405.191	599.401	523.746	SPAC7D4.12c	plasma membrane ThrE amino acid transmembrane transporter family protein (predicted)	I	2615042	2617321	+
SPCC1223.09	2414.85	0.228223	0.0698926	3.26534	0.00109334	0.0272802	2195.42	2252.82	2606.05	2605.13	uro1	uricase Uro1	III	1857343	1858233	-
SPBC16D10.10	1127.71	-0.302576	0.0929861	-3.25399	0.00113797	0.028256	1262.69	1228.45	962.5	1057.21	tad2	tRNA specific adenosine deaminase subunit Tad2	II	3618117	3619540	+
SPAC17H9.04c	733.283	0.343962	0.105963	3.24607	0.00117011	0.0289136	656.684	636.021	822.256	818.171	nrp1	nucleolar RNA-binding protein, human TEX13A and TEX13B ortholog, implicated in mRNA processing	I	2009905	2011719	-
SPBC3E7.16c	2628.08	0.230326	0.0712079	3.23455	0.00121834	0.0299606	2332.36	2504.45	2872.13	2803.35	leu3	2-isopropylmalate synthase Leu3	II	2688592	2690346	-
SPAC11D3.03c	215.352	-0.646003	0.20004	-3.22936	0.00124066	0.0303635	222.13	303.15	174.825	161.302	SPAC11D3.03c	aminomethyltransferase-like and DUF1989 family protein, implicated in urea metabolism	I	111005	111913	-
SPAPB1A10.13	590.207	-0.410656	0.127819	-3.21279	0.00131454	0.0320184	628.648	718.248	464.92	549.01	SPAPB1A10.13	Schizosaccharomyces specific protein	I	1887685	1889274	+
SPCC1020.10	384.002	-0.474247	0.14787	-3.20719	0.0013404	0.0324935	485.235	408.163	308.346	334.265	oca2	serine/threonine protein kinase Oca2	III	758901	760853	-
SPCC794.04c	1415.1	-0.2961	0.093371	-3.17122	0.00151801	0.0366256	1532.26	1587.08	1169.02	1372.04	SPCC794.04c	amino acid transmembrane transporter (predicted)	III	248551	250194	-
SPAC1565.08	9519.72	-0.168168	0.0531245	-3.16554	0.00154795	0.0371727	10048.7	10099.1	8864.22	9066.93	cdc48	AAA family ATPase involved in ubiquitin-mediated protein degradation Cdc48	I	1306439	1308942	+
SPAC1782.10c	1499.62	0.264887	0.084458	3.13632	0.00171082	0.0408917	1425.51	1299.78	1636.83	1636.34	nhp2	box H/ACA snoRNP complex subunit Nhp2	I	4772682	4773146	-
SPBC4C3.05c	719.284	0.368303	0.11761	3.13156	0.00173882	0.0411763	658.841	597.384	745.409	875.502	nuc1	DNA-directed RNA polymerase I complex large subunit Nuc1	II	3127899	3132968	+
SPAC1B3.03c	4455.31	-0.190178	0.0607122	-3.13245	0.00173357	0.0411763	4681.97	4814.74	4115.12	4209.4	wis2	cyclophilin family peptidyl-prolyl cis-trans isomerase Wis2	I	4929945	4931015	-
SPCC622.13c	620.887	-0.35548	0.113833	-3.12282	0.00179128	0.042223	682.563	711.313	553.293	536.378	tti1	ASTRA complex subunit, Armadillo-type fold TTi1	III	1422550	1425846	-
SPBP4H10.10	524.18	-0.384877	0.123522	-3.11585	0.00183415	0.0430352	618.944	568.654	453.393	455.727	rbd3	mitochondrial rhomboid family protease	II	2890645	2891823	+
SPBC30B4.03c	653.147	0.349745	0.112367	3.11252	0.001855	0.0433258	595.221	553.794	738.685	724.888	ldb1	LIM domain binding protein, transcription coregulator	II	1304821	1305996	-
SPAC10F6.13c	3459.72	-0.208811	0.0671541	-3.10942	0.00187453	0.0435829	3576.72	3841.88	3167.99	3252.28	caa1	cytoplasmic aspartate aminotransferase Caa1 (predicted)	I	1230788	1232017	-
SPAC3H1.07	1444.78	0.262138	0.0852739	3.07407	0.00211159	0.0488723	1365.13	1263.13	1540.77	1610.11	aru1	arginase Aru1	I	1944231	1945202	+
SPBC1105.12	2830.67	0.227126	0.0739902	3.06967	0.00214294	0.0493745	2472.54	2743.21	3122.84	2984.09	hhf3	histone H4 h4.3	II	3529767	3530078	+
SPAC23G3.02c	680.115	-0.378197	0.123415	-3.06442	0.00218091	0.0500239	739.713	797.502	528.318	654.926	sib1	ferrichrome synthetase Sib1	I	854523	869527	-
SPBC17D1.05	1071.82	0.296463	0.0968827	3.06002	0.00221324	0.0505389	994.192	930.254	1121	1241.83	SPBC17D1.05	Schizosaccharomyces specific protein	II	3335110	3336216	+
SPCC1183.07	466.908	0.399118	0.130647	3.05494	0.00225104	0.0511737	417.302	388.349	511.028	550.954	rrp5	U3 snoRNP-associated protein Rrp5 (predicted)	III	606337	611409	+
SPAC32A11.02c	1308.71	0.276473	0.0906405	3.05021	0.0022868	0.0517566	1178.58	1188.82	1516.75	1350.66	SPAC32A11.02c	DUF4449 family conserved fungal protein	I	2447948	2450503	-
SPBC19F5.05c	886.193	0.298814	0.0981606	3.04413	0.00233353	0.0524518	783.923	805.428	975.948	979.473	ppp1	pescadillo-family BRCT domain protein Ppp1 (predicted)	II	3711604	3713619	-
SPAC1039.06	684.156	-0.360812	0.118549	-3.04355	0.00233803	0.0524518	726.774	811.372	555.215	643.265	SPAC1039.06	D-serine ammonia-lyase activity (predicted)	I	5460567	5461814	+
SPBC1D7.02c	388.666	-0.421174	0.138531	-3.04029	0.00236349	0.0527914	443.181	446.8	332.36	332.321	scr1	DNA-binding transcription factor Scr1	II	1753589	1755286	+
SPAC29E6.08	2864.9	0.20466	0.0674456	3.03445	0.00240978	0.0535699	2672.03	2652.07	3005.65	3129.85	tbp1	TATA-binding protein (TBP)	I	4415547	4416619	+
SPAC630.07c	591.384	-0.35391	0.116677	-3.03326	0.00241929	0.0535699	666.389	660.788	536.964	501.397	SPAC630.07c	Schizosaccharomyces specific protein	I	357593	358885	-
SPAPB24D3.08c	1937.37	0.240082	0.0793019	3.02745	0.00246631	0.0539109	1719.89	1832.77	2177.63	2019.19	SPAPB24D3.08c	NADP-dependent oxidoreductase, implicated in cellular detoxification (predicted)	I	2961199	2962248	-
SPBC11C11.06c	4972.01	0.178112	0.0588216	3.028	0.00246182	0.0539109	4679.82	4651.27	5336.02	5220.94	SPBC11C11.06c	Schizosaccharomyces specific protein	II	3359360	3359896	-
SPBC16D10.06	929.73	-0.315316	0.104126	-3.02821	0.00246004	0.0539109	985.565	1075.89	777.108	880.36	zrt1	plasma membrane ZIP zinc transmembrane transporter Zrt1	II	3607890	3609116	+
SPAC14C4.12c	150.756	0.658822	0.217978	3.02243	0.00250756	0.0545795	124.004	109.966	184.431	184.623	laf1	Clr6 L associated factor 1 Laf1	I	5251141	5252034	-
SPBC1D7.03	705.491	0.330841	0.109677	3.01651	0.00255704	0.0554205	615.709	634.039	755.015	817.2	clg1	cyclin-like protein involved in autophagy Clg1 (predicted)	II	1746041	1747426	-
SPAC1F7.10	899.223	0.320104	0.106569	3.00374	0.00266683	0.0575562	732.165	866.85	1001.88	995.992	SPAC1F7.10	hydantoin racemase family (predicted)	I	4243969	4244685	+
SPAC821.10c	1836.49	-0.265473	0.0884664	-3.00083	0.00269241	0.0578643	1838.5	2170.59	1673.33	1663.55	sod1	superoxide dismutase Sod1	I	1002999	1003463	-
SPAC1039.08	194.737	-0.573993	0.191433	-2.9984	0.00271403	0.0580848	236.147	229.839	161.377	151.585	SPAC1039.08	serine acetyltransferase (predicted)	I	5464248	5465060	+
SPCPB16A4.07	1484.77	0.249814	0.0835139	2.99128	0.00277809	0.0589624	1319.84	1392.9	1654.12	1572.21	smp4	Schizosaccharomyces specific microprotein Smp4	III	955389	955598	+
SPCC330.06c	8026.14	-0.185327	0.061951	-2.99151	0.00277603	0.0589624	8530.42	8551.6	7884.43	7138.11	pmp20	thioredoxin-related chaperone Pmp20 (predicted)	III	118423	118893	-
SPBC32H8.11	65.3883	1.04326	0.350822	2.97375	0.00294187	0.0621805	54.9933	30.7113	86.4521	89.3964	mei4	DNA-binding forkhead transcription factor, meiotic Mei4	II	1473194	1474747	+
SPCC1620.08	1523.36	-0.247906	0.0835224	-2.96814	0.00299604	0.0630648	1645.48	1662.37	1451.43	1334.14	lsc2	succinate-CoA ligase beta subunit Lsc2 (predicted)	III	2159599	2160900	+
SPBC16G5.15c	393.612	0.41048	0.138439	2.96506	0.00302626	0.0634398	332.116	343.768	441.866	456.699	fkh2	DNA-binding forkhead transcription factor Fkh2	II	4240442	4242662	-
SPCPB16A4.05c	1543.74	-0.239127	0.0808185	-2.95881	0.00308825	0.0644014	1646.56	1696.05	1439.91	1392.45	ure7	urease accessory protein UreG	III	952676	953536	-
SPBC1271.09	780.751	-0.306569	0.103644	-2.95791	0.00309731	0.0644014	865.874	860.906	681.05	715.171	tgp1	plasma membrane glycerophosphodiester transmembrane transporter (predicted)	II	350783	352369	-
SPAC31A2.07c	444.882	0.391248	0.132609	2.9504	0.00317364	0.0657214	377.405	392.312	485.092	524.718	dbp10	ATP-dependent RNA helicase Dbp10 (predicted)	I	399548	402194	-
SPAC227.17c	508.106	-0.375039	0.127508	-2.9413	0.00326841	0.0674109	591.986	555.775	467.802	416.859	SPAC227.17c	DUF3128 family, human c22orf39 ortholog	I	529801	530166	-
SPBC17D1.01	1816.06	0.222441	0.0759801	2.92762	0.00341571	0.070166	1658.42	1694.07	1956.7	1955.06	spp41	DUF3020 family conserved fungal protein Spp41	II	3326992	3328913	+
SPAC22G7.11c	442.494	0.413154	0.141467	2.9205	0.00349466	0.0715007	367.7	391.321	554.254	456.699	cum1	Con-6 family conserved fungal protein	I	755080	755502	-
SPBC1105.11c	6930.46	0.184525	0.0633257	2.91391	0.00356932	0.0727374	6215.32	6759.45	7590.49	7156.57	hht3	histone H3 h3.3	II	3529119	3529529	-
SPAC821.03c	1156.1	0.256993	0.0886149	2.90012	0.00373024	0.0748243	1056.73	1050.13	1268.92	1248.63	slf1	cell cortex node protein Slf1	I	981798	983255	-
SPCC1620.06c	3782.55	-0.185351	0.0638922	-2.901	0.00371974	0.0748243	4088.91	3961.75	3464.81	3614.72	SPCC1620.06c	ribose-phosphate pyrophosphokinase (predicted)	III	2153885	2155070	-
SPCC162.11c	729.411	-0.321294	0.110682	-2.90285	0.00369785	0.0748243	828.134	792.549	609.968	686.992	urk1	uridine kinase/uracil phosphoribosyltransferase (predicted)	III	1556445	1557809	+
SPAC4G9.14	524.118	-0.358863	0.123638	-2.90253	0.00370166	0.0748243	585.516	592.43	480.289	438.237	sym1	mitochondrial Mpv17/PMP22 family protein 2 (predicted)	I	2280423	2281454	+
SPAC227.13c	1503.49	0.256792	0.088817	2.89125	0.00383712	0.0766675	1281.02	1458.29	1676.21	1598.45	isu1	mitochondrial [2Fe-2S] cluster assembly protein Isu1	I	517865	518443	-
SPBC13G1.09	529.108	0.35967	0.12482	2.88151	0.00395777	0.0787704	488.469	438.874	610.928	578.161	enp1	bystin family U3 and U14 snoRNA associated protein Enp1 (predicted)	II	3742426	3743818	+
SPBC651.08c	313.871	0.439896	0.153223	2.87095	0.00409242	0.0808213	265.262	267.485	353.493	369.246	rpc1	DNA-directed RNA polymerase III complex large subunit Rpc1 (predicted)	II	1250083	1254350	-
SPAC19B12.02c	1781.22	0.263868	0.0918944	2.87143	0.00408624	0.0808213	1543.05	1694.07	2099.83	1787.93	gas1	cell wall 1,3-beta-glucanosyltransferase Gas1	I	4878825	4880453	-
SPBPB8B6.04c	17.9467	1.96588	0.685795	2.86657	0.00414951	0.0810104	10.783	3.96275	24.9751	32.0661	grt1	DNA-binding transcription factor Grt1 (predicted)	II	49143	51181	-
SPAC8F11.04	704.643	0.348487	0.121551	2.86701	0.00414369	0.0810104	685.798	554.784	759.818	818.171	SPAC8F11.04	U3 snoRNP-associated protein Cic1/Utp30 family (predicted)	I	2859456	2860704	+
SPAC24H6.09	1038.43	0.265897	0.0927487	2.86686	0.00414568	0.0810104	962.921	923.32	1132.52	1134.95	gef1	Cdc42 RhoGEF Gef1	I	470583	472899	-
SPAC11E3.14	1231.77	0.251274	0.0877947	2.86206	0.00420894	0.0818584	1103.1	1146.22	1365.94	1311.79	SPAC11E3.14	protein with a role in clearing protein aggregates (predicted)	I	5312420	5314186	+
SPBPB2B2.13	1492.14	-0.289333	0.101421	-2.85279	0.0043337	0.0839654	1756.55	1526.65	1463.92	1221.43	gal1	galactokinase Gal1	II	4488491	4490050	+
SPBC17D1.06	334.354	0.423433	0.148583	2.8498	0.00437461	0.0844381	288.984	282.346	386.153	379.935	dbp3	ATP-dependent RNA helicase Dbp3 (predicted)	II	3338604	3340340	+
SPBC106.11c	986.173	0.285434	0.100363	2.84402	0.00445484	0.0856636	927.337	851	1137.33	1029.03	plg7	phospholipase A2, PAF family homolog	II	399368	400684	-
SPAC22F8.04	2104.66	-0.20928	0.0737151	-2.83904	0.00452494	0.0863622	2263.35	2250.84	2000.89	1903.56	pet1	Golgi phosphoenolpyruvate transmembrane transporter Pet1	I	4789789	4790940	+
SPAC23E2.01	278.387	-0.475864	0.16758	-2.83963	0.00451662	0.0863622	313.785	333.861	212.288	253.614	fep1	DNA-binding transcription factor, iron-sensing Fep1	I	443569	445263	+
SPAPB1A11.02	25.2617	1.55129	0.547023	2.83588	0.00456991	0.0868963	10.783	14.8603	33.6203	41.7831	SPAPB1A11.02	esterase/lipase (predicted)	I	2980473	2981589	+
SPCC16A11.01	447.575	0.376056	0.133117	2.82501	0.00472796	0.0889101	367.7	411.135	510.067	501.397	sfk1	plasma membrane protein involved in inositol lipid-mediated signaling Sfk1 (predicted)	III	867996	868982	+
SPAC6F12.10c	2503.39	0.205499	0.072736	2.82527	0.00472407	0.0889101	2294.62	2355.85	2579.15	2783.92	ade3	phosphoribosylformylglycinamidine synthase Ade3	I	1329262	1333233	-
SPCC1739.08c	333.182	-0.420571	0.14878	-2.82679	0.00470167	0.0889101	377.405	385.377	290.095	279.85	SPCC1739.08c	short chain dehydrogenase (predicted)	III	2043282	2044067	-
SPAC110.01	336.058	-0.456768	0.16179	-2.82321	0.00475453	0.0890821	402.206	375.47	246.869	319.689	ppk1	serine/threonine protein kinase Ppk1 (predicted)	I	1908268	1911339	+
SPAC11D3.13	566.404	0.345661	0.122697	2.81719	0.00484456	0.0897824	473.373	524.073	662.799	605.369	hsp3104	ThiJ domain protein, implicated in cellular detoxification	I	130329	130997	+
SPCC584.01c	1063.62	-0.26077	0.0924897	-2.81945	0.00481065	0.0897824	1181.82	1137.31	947.131	988.219	met10	sulfite reductase NADPH flavoprotein subunit (predicted)	III	1526472	1529492	-
SPAC29B12.10c	1119.44	-0.262474	0.0931536	-2.81765	0.00483763	0.0897824	1190.44	1251.24	975.948	1060.12	pgt1	plasma membrane glutathione transmembrane transporter Pgt1	I	5431858	5434413	-
SPCC1450.07c	531.343	-0.33998	0.120748	-2.81561	0.0048684	0.0898984	590.908	596.393	470.684	467.388	dao1	D-amino acid oxidase	III	1736606	1737652	-
SPAC1006.03c	831.77	0.31337	0.111515	2.81012	0.00495227	0.0910428	778.532	705.369	851.073	992.106	red1	NURS complex subunit Iss10 Red1	I	5071212	5073872	-
SPCC1450.16c	1254.03	0.257288	0.0915867	2.80923	0.00496597	0.0910428	1208.77	1076.88	1344.81	1385.64	ptl1	triacylglycerol lipase ptl1	III	1763350	1765038	-
SPAC26F1.04c	1599.83	-0.221847	0.0791491	-2.8029	0.00506447	0.092517	1713.42	1731.72	1491.78	1462.41	etr1	enoyl-[acyl-carrier protein] reductase (predicted)	I	5178325	5179443	+
SPAC22F3.08c	180.491	0.568386	0.203234	2.79671	0.0051626	0.0939323	154.197	136.715	200.761	230.293	rok1	ATP-dependent RNA helicase Rok1 (predicted)	I	689483	690928	+
SPBC530.05	1044.83	0.257845	0.0922289	2.7957	0.00517867	0.0939323	941.355	961.956	1149.81	1126.2	prt1	DNA-binding transcription factor (predicted)	II	796583	798871	+
SPCC1494.03	754.628	0.315247	0.112909	2.79206	0.00523737	0.0941432	666.389	678.62	902.944	770.558	arz1	human RAP1 GTPase-GDP dissociation stimulator ortholog, Zfs1 target number 1	III	2325172	2326650	+
SPAC9.09	79512.7	-0.139787	0.050075	-2.79156	0.00524552	0.0941432	83582.2	83141.4	73562.1	77765.1	met26	homocysteine methyltransferase Met26	I	1478627	1480921	+
SPAC16E8.17c	988.755	-0.266138	0.0952705	-2.7935	0.00521412	0.0941432	1068.59	1090.75	925.038	870.643	SPAC16E8.17c	succinate-CoA ligase alpha subunit (predicted)	I	3532418	3533413	-
SPAC26A3.01	4461.23	0.167604	0.0601056	2.78849	0.00529551	0.0947082	4191.35	4213.39	4772.16	4668.05	sxa1	aspartic protease Sxa1	I	3332669	3334270	+
SPAC513.03	101.414	-0.742721	0.267301	-2.7786	0.00545944	0.0972999	139.101	114.92	79.7281	71.9058	mfm2	M-factor precursor Mfm2	I	2913008	2913184	-
SPBC16E9.05	3314.46	-0.182087	0.0655827	-2.77645	0.00549568	0.0976055	3458.11	3588.27	3158.38	3053.08	erg6	sterol 24-C-methyltransferase Erg6	II	1923986	1925122	+
SPCC1742.01	119.481	0.674788	0.244173	2.76356	0.00571739	0.101192	95.9686	88.1711	139.284	154.5	gsf2	cell surface glycoprotein, galactose-specific flocculin Gsf2	III	959281	963972	-
SPCC4B3.03c	2623.99	0.187672	0.0679618	2.76143	0.00575481	0.101503	2440.19	2466.81	2793.36	2795.58	mam301	multi-pass membrane and CBS domain protein, implicated in magnesium homeostasis and endomembrane organization (predicted)	III	1173490	1175529	+
SPAP7G5.03	297.481	-0.442049	0.160421	-2.75556	0.00585923	0.10299	366.622	319.001	252.632	251.67	prm1	conjugation protein Prm1	I	3736955	3739106	+
SPCC23B6.01c	5762.34	-0.159315	0.0580152	-2.7461	0.0060309	0.105644	5978.09	6181.88	5493.55	5395.85	SPCC23B6.01c	sterol transfer protein (predicted)	III	1264730	1266827	-
SPCC18.17c	746.046	0.289272	0.105416	2.7441	0.0060677	0.105926	665.311	677.629	835.704	805.539	SPCC18.17c	proteasome assembly chaperone (predicted)	III	1986673	1988139	-
SPAC18B11.06	226.945	0.489848	0.178892	2.73823	0.00617713	0.10747	183.311	194.175	273.765	256.529	lcp5	U3 snoRNP-associated protein Lcp5 (predicted)	I	306964	307947	-
SPBC1711.07	316.51	0.415962	0.152311	2.731	0.00631422	0.108745	274.966	267.485	364.059	359.529	rrb1	WD repeat protein Rrb1 (predicted)	II	2146256	2147698	+
SPAC20G8.04c	881.02	0.283782	0.103905	2.73116	0.00631116	0.108745	794.706	794.53	906.787	1028.06	SPAC20G8.04c	mitochondrial electron transfer flavoprotein-ubiquinone oxidoreductase Cir2 (predicted)	I	1396025	1397923	-
SPBC16H5.08c	1776.47	0.218126	0.0798374	2.73213	0.00629257	0.108745	1697.24	1588.07	1860.64	1959.92	SPBC16H5.08c	ribosome biogenesis ATPase, Arb family ABCF2-like (predicted)	II	2284377	2286345	+
SPAC4F8.08	1684.75	-0.223954	0.0824586	-2.71596	0.0066084	0.113429	1905.35	1725.78	1562.86	1545	mug114	Schizosaccharomyces pombe specific protein Mug114	I	2664524	2664979	-
SPCC1393.08	1387.93	-0.235371	0.086867	-2.70956	0.00673725	0.115254	1471.88	1529.62	1218.97	1331.23	fil1	DNA-binding transcription factor, zf-GATA type	III	812655	814328	+
SPAC1F7.02c	572.185	0.358512	0.132382	2.70815	0.00676586	0.115358	560.716	442.837	619.573	665.614	has1	ATP-dependent RNA helicase Has1 (predicted)	I	4217418	4219154	-
SPBC2D10.10c	4448.4	0.179266	0.0663312	2.70258	0.00688028	0.116919	4043.62	4300.57	4898.95	4550.47	fib1	fibrillarin, rRNA methyltransferase	II	2982764	2983681	-
SPAC17H9.05	519.762	0.332044	0.123365	2.69157	0.00711169	0.120054	464.747	455.716	560.018	598.567	ebp2	rRNA processing protein Ebp2	I	2012932	2013933	+
SPBC2G2.05	667.335	0.297106	0.110346	2.6925	0.00709191	0.120054	611.396	586.486	729.079	742.379	rpl1603	60S ribosomal protein L13/L16 (predicted)	II	3443267	3443918	+
SPBC215.05	11723.4	0.147469	0.0548301	2.68956	0.00715472	0.120383	11028.8	11220.5	12671	11973.3	gpd1	glycerol-3-phosphate dehydrogenase Gpd1	II	4035814	4036971	+
SPAC869.02c	576.731	0.323963	0.120766	2.68256	0.00730602	0.121727	485.235	538.933	661.839	620.916	yhb1	nitric oxide dioxygenase Yhb1	I	5517959	5519242	+
SPCC1020.06c	7041.65	-0.14747	0.0549685	-2.6828	0.00730083	0.121727	7434.87	7367.73	6695.24	6668.78	tal1	transaldolase (predicted)	III	773498	774466	+
SPCC895.04c	843.877	-0.272222	0.101472	-2.68273	0.0073023	0.121727	912.241	934.217	790.556	738.492	ufe1	SNARE Ufe1 (predicted)	III	1001020	1002264	-
SPAC23H4.06	1131.19	-0.266969	0.0995937	-2.68058	0.00734942	0.122053	1141.92	1328.51	994.199	1060.12	gln1	glutamate-ammonia ligase Gln1	I	1596492	1597571	-
SPBC16A3.08c	6479.38	0.165647	0.0618633	2.67762	0.00741465	0.122738	6164.64	6051.11	6559.79	7141.99	oga1	Stm1 homolog Oga1	II	4283938	4285122	+
SPAC22F3.10c	1835.5	0.207992	0.077724	2.67603	0.00744989	0.122923	1650.88	1755.5	1993.2	1942.43	gcs1	glutamate-cysteine ligase Gcs1	I	684010	686270	+
SPAC11G7.01	634.645	0.300202	0.11223	2.67488	0.00747561	0.122951	565.029	572.617	693.538	707.398	mtl2	plasma membrane-associated serine-rich cell wall sensor Mtl2	I	3959898	3961508	+
SPAC26F1.06	33943.1	-0.131328	0.0491658	-2.67112	0.00755993	0.123939	35358.5	35615.2	31813.4	32985.3	gpm1	monomeric 2,3-bisphosphoglycerate (BPG)-dependent phosphoglycerate mutase (PGAM), Gpm1	I	5173972	5174607	-
SPAC1486.09	331.4	0.401304	0.150661	2.66362	0.00773046	0.125131	272.81	298.197	371.744	382.85	nob1	ribosome biogenesis protein Nob1 (predicted)	I	3209901	3211282	+
SPCC1223.11	586.75	0.310693	0.116634	2.66384	0.00772551	0.125131	531.601	516.148	663.76	635.492	ptc2	protein phosphatase PP2C Ptc2	III	1863757	1864869	+
SPBC577.10	2172.16	-0.211415	0.0793472	-2.66442	0.00771202	0.125131	2355.01	2307.31	2133.45	1892.87	pre4	20S proteasome complex subunit beta 7, Pre4	II	769682	770470	+
SPAC19D5.01	659.497	-0.310506	0.11644	-2.66665	0.00766108	0.125131	761.279	699.425	623.416	553.869	pyp2	tyrosine phosphatase Pyp2	I	5202823	5204958	+
SPAC23G3.06	2861.29	0.180968	0.0680612	2.6589	0.00783959	0.126497	2704.37	2659.99	3114.2	2966.6	nop58	U3 snoRNP protein Nop58 (predicted)	I	876947	878582	+
SPAC3C7.11c	6604.17	-0.152339	0.0573365	-2.65693	0.0078855	0.126838	6793.28	7111.15	6240.88	6271.35	cnx1	calnexin Cnx1	I	2086615	2088297	-
SPBC1683.09c	1628.23	-0.227043	0.0855745	-2.65316	0.00797421	0.127862	1759.78	1752.52	1593.6	1407.02	frp1	plasma membrane ferric-chelate reductase Frp1	II	160461	162155	-
SPCC191.05c	82.2803	-0.786217	0.296621	-2.65058	0.00803542	0.128441	114.3	94.1152	65.3194	55.3869	SPCC191.05c	nucleoside 2-deoxyribosyltransferase (predicted)	III	1712319	1712954	-
SPBP16F5.03c	515.303	-0.340432	0.128505	-2.64917	0.00806909	0.128577	591.986	559.738	421.694	487.793	tra1	SAGA complex phosphatidylinositol pseudokinase Tra1	II	1894433	1905532	-
SPBC1E8.05	5427.37	0.160152	0.0605454	2.64516	0.00816525	0.129304	4967.72	5284.32	5698.15	5759.27	SPBC1E8.05	conserved fungal cell surface protein, Kre9/Knh1 family	II	1970914	1971867	+
SPBC106.13	523.93	-0.321917	0.121665	-2.64593	0.0081467	0.129304	588.751	575.589	461.078	470.303	gid9	GID complex subunit Gid9 (predicted)	II	402696	404022	+
SPAC6B12.07c	1457.4	0.222441	0.0841986	2.64186	0.00824521	0.130168	1325.23	1365.17	1624.34	1514.88	SPAC6B12.07c	ubiquitin-protein ligase E3 with SPX domain (predicted)	I	2421791	2423203	-
SPCC1739.13	52840.8	-0.135744	0.0516391	-2.6287	0.00857125	0.134898	56336.8	54313.4	49002	51711	ssa2	Hsp70 family heat shock protein Ssa2	III	2057243	2059186	+
SPAC4G9.08c	385.33	0.372516	0.142112	2.62128	0.00876012	0.137448	327.803	343.768	413.049	456.699	rpc2	DNA-directed RNA polymerase III complex subunit Rpc2	I	2266025	2269522	-
SPBC216.07c	729.715	-0.289829	0.110735	-2.61732	0.00886239	0.138627	799.02	806.419	614.771	698.652	tor2	serine/threonine protein kinase Tor2	II	915271	922284	-
SPCC970.08	805.937	0.270555	0.103573	2.61221	0.00899586	0.13986	759.123	702.397	877.009	885.219	kcs1	inositol polyphosphate kinase Kcs1 (predicted)	III	496863	499766	-
SPAC323.04	1324.02	0.222734	0.0852371	2.61312	0.00897206	0.13986	1204.46	1239.35	1399.56	1452.69	SPAC323.04	mitochondrial ATPase (predicted)	I	3912773	3914524	+
SPBC800.11	360.005	-0.375319	0.143829	-2.60948	0.00906787	0.140552	398.971	414.107	318.912	308.029	SPBC800.11	inosine-uridine preferring nucleoside hydrolase (predicted)	II	275907	277076	+
SPCC1529.01	1009.3	-0.245798	0.0942555	-2.60778	0.00911305	0.140825	1066.44	1123.44	913.511	933.804	SPCC1529.01	transmembrane transporter (predicted)	III	237554	239250	+
SPCC645.14c	8623.8	-0.142539	0.0547492	-2.60349	0.00922798	0.142172	9225.93	8873.58	8209.11	8186.57	sti1	chaperone activator Sti1 (predicted)	III	1261606	1263381	-
SPAC26A3.11	1003.45	-0.250522	0.0962855	-2.60187	0.00927178	0.142418	1061.05	1119.48	950.013	883.275	SPAC26A3.11	mitochondrial omega-amidase (predicted)	I	3356732	3357749	+
SPAC5H10.02c	69.6426	0.836632	0.321877	2.59923	0.00934338	0.142497	47.4452	52.5064	98.9396	79.6794	hsp3102	glyoxylase III Hsp3102	I	148213	148935	-
SPBC21C3.08c	2792.36	0.183505	0.0706168	2.5986	0.00936052	0.142497	2517.83	2711.51	3014.3	2925.79	car2	ornithine transaminase Car2	II	3809411	3810727	-
SPBC460.02c	2321.39	-0.194464	0.0748002	-2.59978	0.00932845	0.142497	2366.87	2587.67	2168.03	2163	SPBC460.02c	translation elongation factor, glutathione S-transferase (predicted)	AB325691	8856	9803	-
SPBC428.10	1796.78	0.212575	0.0819037	2.59543	0.00944729	0.142967	1694.01	1635.62	2026.82	1830.68	SPBC428.10	Schizosaccharomyces pombe specific protein	II	461024	463561	+
SPAC29A4.12c	784.353	-0.283437	0.109188	-2.59588	0.00943503	0.142967	887.44	835.149	753.094	661.728	mug108	Schizosaccharomyces specific protein Mug108	I	5124780	5125232	+
SPBP8B7.20c	494.777	0.32486	0.125284	2.59299	0.00951444	0.143136	436.711	441.846	536.964	563.586	nop2	rRNA (cytosine-C5-)-methyltransferase activity Nop2 (predicted)	II	3674751	3676577	-
SPBC19C2.04c	304.921	-0.409901	0.158077	-2.59305	0.00951294	0.143136	346.134	349.712	243.987	279.85	ubp11	ubiquitin C-terminal hydrolase Ubp11	II	1676524	1677576	-
SPAC1006.07	10736.5	0.136705	0.0527683	2.59067	0.00957891	0.143684	10303.1	10153.5	11392.5	11096.8	tif1	translation initiation factor eIF4A tif1	I	5085563	5086741	+
SPBC4F6.07c	261.873	0.439023	0.16969	2.58721	0.00967578	0.144712	231.834	212.998	317.952	284.708	mak5	ATP-dependent RNA helicase Mak5 (predicted)	II	2698289	2700359	-
SPAC19B12.03	763.325	0.277225	0.107352	2.58238	0.00981206	0.146323	700.894	679.611	796.32	876.473	bgs3	cell wall 1,3-beta-glucan synthase catalytic subunit Bgs3	I	4883998	4889478	+
SPCC285.11	1391.47	-0.217309	0.0843952	-2.57489	0.0100271	0.149095	1531.18	1461.26	1311.19	1262.24	dsc5	UBX domain Sre1 cleavage protein	III	1816102	1817572	+
SPACUNK4.16c	3668.97	-0.164314	0.0639232	-2.5705	0.0101553	0.150563	3815.02	3939.96	3400.45	3520.47	tps3	alpha,alpha-trehalose-phosphate synthase (predicted)	I	2877519	2880353	+
SPAC23C11.01	646.239	0.293278	0.114253	2.56692	0.0102607	0.15125	577.968	583.514	677.208	746.266	ice2	ER membrane protein involved triglyceride mobilization ICE2 family	I	2133439	2135021	+
SPBPB10D8.01	163.006	-0.569711	0.221927	-2.56711	0.010255	0.15125	171.45	217.951	145.047	117.576	SPBPB10D8.01	cysteine transmembrane transporter (predicted)	II	81295	82953	+
SPCC5E4.05c	1292.31	-0.224729	0.0876635	-2.56354	0.0103612	0.152291	1345.72	1439.47	1217.05	1167.01	mgl1	mitochondrial acylglycerol lipase Mgl1 (predicted)	III	649656	650792	-
SPBC2G5.03	181.861	0.524014	0.204549	2.56181	0.0104129	0.152579	163.901	134.733	226.697	202.114	ctu1	cytosolic thiouridylase subunit Ctu1	II	2581957	2582964	+
SPAC27D7.03c	3517.55	-0.501372	0.19578	-2.56089	0.0104404	0.152579	4561.21	3684.36	2661.76	3162.88	mei2	RNA-binding protein involved in meiosis Mei2	I	4511040	4513292	-
SPAC25B8.10	1184.12	0.229234	0.0895876	2.55877	0.0105042	0.153075	1098.79	1081.83	1318.87	1236.97	SPAC25B8.10	trans-aconitate 3-methyltransferase (predicted)	I	4172176	4172946	+
SPCC757.12	441.145	-0.339568	0.132839	-2.55624	0.0105809	0.153754	513.27	472.557	383.271	395.482	SPCC757.12	alpha-amylase homolog (predicted)	III	73483	75360	+
SPCC569.09	217.21	0.507821	0.199021	2.55159	0.0107233	0.153922	200.564	158.51	284.331	225.434	SPCC569.09	Schizosaccharomyces specific protein	III	2414254	2414553	+
SPBC4F6.14	587.328	0.300154	0.117556	2.55329	0.0106711	0.153922	535.915	517.138	670.484	625.775	nop4	RNA-binding protein Nop4 (predicted)	II	2716865	2718889	+
SPBC1709.05	13455	0.131273	0.0514995	2.549	0.0108031	0.153922	12901.8	12784.8	13874.6	14258.7	sks2	Hsp70 family heat shock protein, ribosome associated Sks2	II	1106456	1108297	+
SPBC428.05c	5612.77	-0.149982	0.0588163	-2.55	0.0107724	0.153922	5779.68	6028.33	5369.64	5273.42	arg12	argininosuccinate synthase Arg12	II	449771	451003	-
SPBC1709.18	1403.41	-0.216867	0.0850622	-2.54952	0.0107873	0.153922	1482.66	1534.57	1341.93	1254.46	tif452	translation initiation factor eIF4E, 4F complex E subunit isoform 2, stress response factor	II	1134499	1135377	+
SPBC26H8.11c	746.255	-0.270039	0.105917	-2.54953	0.0107867	0.153922	805.489	826.232	695.459	657.841	SPBC26H8.11c	acyl-coenzyme A thioesterase	II	3974366	3974893	-
SPBC1773.03c	710.804	-0.276912	0.108508	-2.55199	0.0107109	0.153922	770.984	786.605	665.681	619.945	SPBC1773.03c	aminotransferase class-III, possible transaminase, unknown specificity	II	286039	287418	-
SPBC8D2.18c	50009.6	-0.126951	0.0500071	-2.53866	0.0111277	0.158106	52465.7	51951.6	49014.5	46606.6	SPBC8D2.18c	adenosylhomocysteinase (predicted)	II	1391667	1392968	-
SPAC4F8.15	829.499	0.256159	0.101086	2.53406	0.011275	0.159756	760.201	751.931	884.693	921.171	itr1	myo-inositol transmembrane transporter Itr1	I	2639701	2641428	-
SPAC26F1.11	27.346	1.32962	0.526368	2.52603	0.011536	0.163001	18.3311	12.8789	46.1078	32.0661	SPAC26F1.11	dubious	I	5158023	5158340	-
SPBC215.13	1169.76	0.228188	0.090737	2.51483	0.0119089	0.167347	1116.04	1039.23	1237.23	1286.53	mtl3	plasma membrane-associated serine-rich cell wall sensor Mtl1/Mtl3	II	4056168	4057772	+
SPAC4G8.03c	475.006	-0.33579	0.133502	-2.51525	0.0118948	0.167347	536.993	523.082	385.192	454.756	puf5	pumilio family RNA-binding protein Puf5 (predicted)	I	758208	760550	-
SPCC290.02	299.595	0.408289	0.162683	2.50972	0.0120826	0.169322	282.514	232.811	340.045	343.01	rpc34	DNA-directed RNA polymerase III complex subunit Rpc34 (predicted)	III	1992766	1993845	+
SPBP8B7.05c	3106.42	0.186946	0.0745665	2.5071	0.0121726	0.170116	2936.21	2874.97	3511.88	3102.64	nce103	carbonic anhydrase (predicted)	II	3641216	3642202	-
SPAC22F8.09	433.788	0.340439	0.135878	2.50548	0.0122287	0.170435	404.362	361.6	468.763	500.425	rrp16	rRNA processing protein Rrp16 (predicted)	I	4803179	4804493	+
SPAC19E9.01c	795.064	0.256766	0.102845	2.49662	0.0125382	0.173802	712.756	736.08	852.034	879.388	nup40	nucleoporin Nup40	I	1352357	1353659	-
SPAC25A8.01c	1414.88	-0.217241	0.0870118	-2.49668	0.0125361	0.173802	1577.55	1465.23	1261.24	1355.52	fft3	SMARCAD1 family ATP-dependent DNA helicase Fft3	I	2098281	2101049	-
SPBC530.11c	545.31	0.297996	0.119696	2.4896	0.0127887	0.176639	496.018	482.464	605.165	597.595	SPBC530.11c	DNA-binding transcription factor, zf-fungal binuclear cluster type (predicted)	II	814819	817469	-
SPAC22F8.06	1703.83	-0.19288	0.0774945	-2.48895	0.0128119	0.176639	1807.23	1827.82	1604.17	1576.1	pam1	20S proteasome complex subunit beta 6 Pam1	I	4795479	4796156	+
SPBC4.01	194.607	-1.28786	0.517686	-2.48773	0.0128563	0.176774	372.013	180.305	109.506	116.604	dni2	tetraspan protein, claudin Dni2	II	1184427	1185324	+
SPAC1F8.03c	825.188	-0.258554	0.104183	-2.48172	0.0130749	0.179297	900.38	897.562	790.556	712.256	str3	plasma membrane heme transmembrane transporter Str3	I	88367	90259	-
SPBC1703.05	350.723	0.364227	0.1469	2.47943	0.0131593	0.179972	321.333	292.252	394.798	394.51	rio2	protein kinase, RIO family Rio2 (predicted)	II	2924013	2925201	+
SPAC56F8.16	954.989	-0.250454	0.101264	-2.47327	0.0133883	0.182616	1073.99	1001.58	823.216	921.171	esc1	DNA-binding transcription factor Esc1 (predicted)	I	1154733	1155974	+
SPCC1827.01c	232.588	0.452712	0.183117	2.47225	0.0134264	0.182649	216.738	176.342	258.396	278.878	utp25	U3 associated protein Utp25 (predicted)	III	2374120	2376078	-
SPCC550.11	1393.15	0.222502	0.0903325	2.46315	0.0137724	0.186859	1278.86	1292.85	1403.41	1597.47	nmd5	karyopherin/importin beta family nuclear import/export signal receptor Nmd5 (predicted)	III	1207663	1211089	+
SPAPB8E5.04c	1932.07	-0.18496	0.0751613	-2.46084	0.013861	0.187564	2063.86	2047.75	1845.27	1771.41	npc2	Niemann-Pick disease type C2 protein hE1 homolog Npc2 (predicted)	I	4914464	4915030	-
SPAC17G6.02c	744.167	0.258052	0.104952	2.45875	0.0139421	0.188163	673.937	681.592	809.768	811.369	tco1	RTA1-like protein	I	3588975	3589949	-
SPBC1289.17	59.1334	0.867706	0.353068	2.45762	0.0139861	0.18826	43.132	40.6181	64.3588	88.4247	Tf2-11	retrotransposable element/transposon Tf2-type	II	4414657	4418658	+
SPBC25B2.03	1769.95	0.187412	0.0766188	2.44603	0.0144439	0.193912	1650.88	1659.4	1904.83	1864.69	SPBC25B2.03	zf-C3HC4 type zinc finger	II	2602284	2604227	+
SPAC17C9.11c	991.449	-0.229052	0.0937724	-2.44264	0.0145804	0.195232	1061.05	1078.86	917.353	908.539	SPAC17C9.11c	zf-C2H2 type zinc finger protein/UBA domain protein	I	4480905	4481930	+
SPAC513.07	708.875	-0.261431	0.107299	-2.43648	0.014831	0.198069	773.14	772.735	656.075	633.548	SPAC513.07	flavonol reductase/cinnamoyl-CoA reductase family	I	2921568	2922578	+
SPCC736.15	7795.38	0.138615	0.0569761	2.43286	0.0149799	0.199538	7628.97	7214.18	8123.62	8214.75	pil1	eisosome BAR domain protein Pil1	III	349172	350227	+
SPBC3B8.09	813.485	0.250874	0.103299	2.42861	0.0151567	0.201367	726.774	758.866	855.876	912.426	utp3	U3 snoRNP-associated protein Utp3 (predicted)	II	3375561	3377354	-
SPAC13C5.06c	267.505	0.408447	0.168253	2.42758	0.0152	0.201419	218.895	240.737	321.794	288.595	mug121	Schizosaccharomyces pombe specific protein Mug121	I	434524	435101	-
SPAC2E1P5.05	244.951	0.424796	0.17521	2.4245	0.0153295	0.202205	225.365	193.184	285.292	275.963	rrp9	U3 snoRNP-associated protein Rrp9 (predicted)	I	3329362	3330936	+
SPAC23A1.14c	1249.94	-0.211946	0.0874261	-2.42429	0.0153383	0.202205	1360.81	1322.57	1188.24	1128.14	SPAC23A1.14c	pyridoxal phosphate-dependent transferase, unknown specificity, implicated in sulfur compound metabolism	I	4101759	4102955	-
SPAC16A10.01	427.365	0.324389	0.134045	2.42001	0.0155202	0.204077	365.543	393.302	478.368	472.246	SPAC16A10.01	plasma membrane ThrE amino acid transmembrane transporter family protein (predicted)	I	3077676	3080168	+
SPCC794.06	313.714	0.374338	0.15479	2.41837	0.0155904	0.204474	276.045	270.457	337.163	371.189	SPCC794.06	transmembrane transporter (predicted)	III	260437	261732	+
SPCC23B6.04c	1656.29	0.203477	0.0841716	2.41741	0.0156314	0.204488	1552.75	1526.65	1675.25	1870.52	pdr16	meiotic sec14 cytosolic factor family, phospholipid-intermembrane transfer protein Pdr16 (predicted)	III	1277873	1280899	-
SPBC1703.14c	906.968	0.236864	0.0981934	2.41222	0.0158557	0.206892	857.248	808.4	975.948	986.275	top1	DNA topoisomerase I	II	2942037	2944580	-
SPCC417.16	10485.5	0.1586	0.0659971	2.40314	0.0162549	0.21118	10363.5	9457.09	11604.8	10516.7	SPCC417.16	mitochondrial protein (predicted)	III	1703167	1703325	-
SPCC70.08c	813.079	-0.264373	0.110024	-2.40287	0.0162668	0.21118	815.194	958.984	739.646	738.492	SPCC70.08c	methyltransferase (predicted)	III	2367804	2368636	-
SPCC18B5.03	350.255	0.380355	0.158384	2.40147	0.0163294	0.211322	281.436	326.926	357.335	435.322	wee1	M phase inhibitor protein kinase Wee1	III	722234	724867	+
SPAC29E6.09	545.349	-0.291924	0.121596	-2.40077	0.0163604	0.211322	624.335	576.579	500.462	480.02	SPAC29E6.09	Schizosaccharomyces specific protein	I	4417470	4418489	+
SPAC22E12.13c	812.685	0.251337	0.104948	2.39486	0.0166265	0.214218	746.183	738.061	927.919	838.577	rlp24	ribosomal L24-like protein involved in ribosome biogenesis Rlp24 (predicted)	I	5043797	5044672	-
SPBPB21E7.10	5.80633	3.37963	1.41179	2.39386	0.0166722	0.214267	0	1.98137	11.5269	9.717	SPBPB21E7.10	Schizosaccharomyces specific protein	II	61496	61855	+
SPCC191.01	1194.43	-0.225718	0.0943836	-2.39149	0.01678	0.215112	1328.46	1247.27	1165.18	1036.8	SPCC191.01	Schizosaccharomyces specific protein	III	1706461	1706997	+
SPAC22G7.06c	2059.22	0.219562	0.091854	2.39034	0.0168327	0.215248	1932.31	1873.39	1995.12	2436.05	ura1	carbamoyl-phosphate synthase (glutamine hydrolyzing), aspartate carbamoyltransferase Ura1	I	739300	746034	-
SPBC19F5.04	3371.86	0.16369	0.0685711	2.38716	0.016979	0.216578	3041.88	3318.8	3582.96	3543.79	SPBC19F5.04	aspartate kinase (predicted)	II	3709272	3711202	+
SPAC11D3.02c	574.492	-0.286565	0.120226	-2.38356	0.0171462	0.218166	601.691	660.788	533.121	502.369	SPAC11D3.02c	ELLA family acetyltransferase (predicted)	I	109829	110281	-
SPAC24B11.09	214.141	0.456392	0.191896	2.37834	0.017391	0.219089	160.667	200.119	233.421	262.359	mpc2	mitochondrial carrier, pyruvate Mpc2 (predicted)	I	216483	216839	+
SPBC543.07	547.106	0.289579	0.121694	2.37958	0.0173324	0.219089	472.295	512.185	586.914	617.029	pek1	MAP kinase kinase Pek1	II	4312763	4313854	+
SPBC1773.05c	713.447	0.269712	0.113446	2.37745	0.0174329	0.219089	662.076	632.058	832.822	726.832	tms1	hexitol dehydrogenase (predicted)	II	290876	291958	-
SPBC14F5.05c	25086.3	-0.115229	0.0484622	-2.3777	0.0174209	0.219089	26139	26036.2	23926.1	24243.9	sam1	S-adenosylmethionine synthetase	II	4162528	4163676	-
SPAC1296.01c	1349.91	-0.204998	0.0861786	-2.37875	0.0173713	0.219089	1498.84	1392.9	1265.08	1242.8	SPAC1296.01c	phosphoacetylglucosamine mutase (predicted)	I	708055	710023	-
SPCP1E11.11	794.459	0.243022	0.102364	2.37409	0.0175924	0.220552	719.225	736.08	864.521	858.011	puf6	pumilio family RNA-binding protein Puf6 (predicted)	III	2409922	2411850	+
SPAC24H6.11c	463.663	-0.315131	0.132824	-2.37255	0.017666	0.220933	536.993	491.38	390.956	435.322	SPAC24H6.11c	sulfate transmembrane transporter (predicted)	I	465299	468175	+
SPAC926.08c	299.875	0.370926	0.156551	2.36936	0.0178188	0.221061	269.575	253.616	335.242	341.067	rpf2	Brix domain ribosome biogenesis protein Rpf2	I	3898584	3899687	-
SPCC1393.05	439.593	0.314537	0.132731	2.36974	0.0178006	0.221061	376.326	407.172	481.25	493.624	ers1	RNA-silencing factor Ers1	III	801197	804501	+
SPAC13D6.02c	1532.62	0.197562	0.0834043	2.36873	0.0178491	0.221061	1489.13	1367.15	1630.1	1644.12	byr3	translational activator, zf-CCHC type zinc finger protein (predicted)	I	2247943	2248482	-
SPAC4D7.08c	2746.44	0.165759	0.0699106	2.37102	0.0177391	0.221061	2508.12	2668.91	2862.53	2946.19	ade4	amidophosphoribosyltransferase Ade4	I	5364360	5365961	-
SPCC965.13	899.704	-0.230551	0.0974747	-2.36523	0.0180186	0.222085	963.999	978.798	818.413	837.605	SPCC965.13	plasma membrane pyridoxal family transmembrane transporter (predicted)	III	2312480	2314093	+
SPBC25B2.08	162.429	-0.520315	0.219919	-2.36594	0.0179845	0.222085	200.564	182.286	114.309	152.557	SPBC25B2.08	Schizosaccharomyces pombe specific protein	II	2612209	2612586	+
SPAC1527.03	279.747	0.380196	0.161035	2.36095	0.018228	0.2237	240.461	245.69	313.149	319.689	lar1	RNA-binding protein, LARP1 family Lar1 (predicted)	I	4384659	4386086	+
SPAC1093.04c	523.382	0.287529	0.121875	2.35922	0.0183134	0.2237	471.217	471.567	565.781	584.963	cca1	CTP 3'-tRNA nucleotidyltransferase Cca1	I	4616462	4618140	-
SPBC20F10.01	1786.75	0.182422	0.0773211	2.35928	0.0183104	0.2237	1661.66	1686.15	1942.29	1856.92	gar1	box H/ACA snoRNP complex subunit Gar1	II	3283373	3284083	+
SPAC1687.16c	2137.87	0.181276	0.0768736	2.35811	0.0183683	0.2237	2054.16	1953.63	2181.47	2362.2	erg31	C-5 sterol desaturase Erg31	I	933052	933954	-
SPAC1002.09c	5615.12	-0.141335	0.0599215	-2.35868	0.0183401	0.2237	5757.04	6022.38	5442.64	5238.43	dld1	dihydrolipoamide dehydrogenase Dld1	I	1812133	1813668	-
SPBC1348.04	2.65827	4.8054	2.04149	2.35387	0.0185791	0.223884	0	0	4.80289	5.8302	SPBC1348.04	methyltransferase (predicted)	II	12176	12613	+
SPBC30D10.18c	1297.66	0.243062	0.103319	2.35253	0.0186461	0.223884	1134.37	1242.32	1267.96	1545.97	rpl102	60S ribosomal protein L10a	II	3060570	3061481	+
SPCP1E11.08	918.531	0.236067	0.100269	2.35433	0.0185563	0.223884	868.031	819.298	951.934	1034.86	nsa2	ribosome biogenesis protein Nsa2 (predicted)	III	2406373	2407346	+
SPAC1F5.09c	573.423	-0.285849	0.121363	-2.35531	0.0185071	0.223884	648.058	612.244	546.569	486.822	shk2	PAK-related kinase Shk2	I	273152	274921	+
SPAC22F3.09c	465.012	-0.319433	0.135757	-2.35298	0.0186236	0.223884	502.487	530.017	449.551	377.991	res2	MBF transcription factor complex subunit Res2	I	686593	688730	+
SPBC460.04c	15.6453	-1.73713	0.737327	-2.35598	0.0184738	0.223884	19.4094	28.7299	11.5269	2.9151	SPBC460.04c	sulfonate/alpha-ketoglutarate dioxygenase (predicted)	AB325691	14073	15248	-
SPAC631.02	1122.05	0.212242	0.0902733	2.35111	0.0187175	0.224215	1062.12	1017.43	1194	1214.62	bdf2	BET family double bromodomain protein Bdf2	I	2107940	2110123	+
SPAC18G6.02c	137.307	0.532452	0.226908	2.34655	0.0189479	0.226445	118.613	106.003	162.338	162.274	chp1	heterochromatin (HP1) family chromodomain protein Chp1	I	2210977	2213859	-
SPAPB1A10.16	541.546	-0.281277	0.120105	-2.34193	0.0191844	0.228738	604.926	583.514	485.092	492.652	dpc13	mitochondrial conserved protein Dpc13 (predicted)	I	1863972	1864457	+
SPCC825.03c	1642.95	0.200116	0.0854983	2.34059	0.0192534	0.229026	1512.85	1545.47	1862.56	1650.92	psy1	plasma membrane SNARE Psy1	III	1028292	1029146	-
SPAC644.09	1085.88	0.218358	0.0935631	2.3338	0.0196061	0.232141	1035.17	972.854	1131.56	1203.94	SPAC644.09	pyridoxal phosphate homeostasis protein (predicted)	I	2689703	2690992	+
SPAC1039.05c	700.072	-0.259032	0.110959	-2.33449	0.0195703	0.232141	793.628	732.117	615.731	658.813	klf1	DNA-binding transcription factor, zf-fungal binuclear cluster type Klf1	I	5456745	5459395	-
SPBC215.08c	2355.36	0.196389	0.0843726	2.32764	0.0199313	0.235448	2191.1	2199.32	2306.35	2724.65	arg4	arginine specific carbamoyl-phosphate synthase Arg4	II	4041736	4045218	-
SPCC777.05	623.338	-0.263697	0.113333	-2.32675	0.0199786	0.235462	670.702	689.518	576.347	556.784	gtr2	Gtr1/RagA G protein Gtr2	III	1605132	1606157	+
SPAC8C9.04	2809.81	-0.155959	0.0671327	-2.32314	0.0201715	0.237189	2920.03	3002.77	2663.69	2652.74	SPAC8C9.04	Schizosaccharomyces specific protein	I	3646275	3648218	+
SPCC330.01c	481.202	0.293295	0.126489	2.31874	0.0204093	0.239435	441.024	424.014	534.082	525.69	rhp16	DNA helicase/ubiquitin protein ligase E3, Rad16 ortholog Rhp16	III	102685	105576	-
SPAC922.07c	318.888	-0.351585	0.151723	-2.31728	0.0204886	0.239816	364.465	350.703	276.647	283.736	atd2	aldehyde dehydrogenase (predicted)	I	5487116	5488606	-
SPAP8A3.07c	4065.14	0.148985	0.0643402	2.31559	0.0205807	0.240343	3764.34	3945.9	4167.95	4382.37	SPAP8A3.07c	phospho-2-dehydro-3-deoxyheptonate aldolase (predicted)	I	5326720	5328109	-
SPCC645.03c	1546.13	-0.186918	0.0807948	-2.31349	0.0206957	0.240588	1608.82	1683.18	1447.59	1444.92	isa1	mitochondrial [4Fe-4S] cluster assembly and transfer protein Isa1	III	1231042	1231702	-
SPCC1919.06c	251.795	-0.39162	0.169238	-2.31402	0.0206665	0.240588	278.201	293.243	216.13	219.604	wtf25	wtf element	III	2219127	2220191	-
SPAC3H1.11	1272.23	-0.21808	0.0944088	-2.30995	0.0208909	0.242306	1460.02	1276.99	1139.25	1212.68	hsr1	DNA-binding transcription factor Hsr1	I	1959311	1961059	+
SPCC1322.09	1162.33	-0.203396	0.0883331	-2.3026	0.0213012	0.246506	1238.97	1249.26	1088.34	1072.76	SPCC1322.09	Golgi protein, associated with COP vesicles (predicted), DUF5427	III	1306194	1307773	+
SPAC19D5.04	785.707	-0.240439	0.10452	-2.30042	0.0214243	0.247371	854.013	848.027	692.577	748.209	ptr1	HECT-type ubiquitin-protein ligase E3 Ptr1	I	5208776	5218459	+
SPCC825.01	1030.97	0.216905	0.0943486	2.29897	0.0215064	0.24776	952.138	955.022	1069.12	1147.58	SPCC825.01	ATPase, involved in cytoplasmic translational initiation (predicted)	III	1022681	1025149	+
SPAC17G6.13	3858.73	-0.141885	0.0617803	-2.29661	0.0216412	0.248752	4018.82	4077.66	3680.94	3657.48	slt1	Schizosaccharomyces specific protein Slt1	I	3615626	3616927	+
SPCC794.02	176.832	-0.460693	0.200773	-2.2946	0.0217562	0.249513	214.582	195.165	146.969	150.613	wtf5	wtf element Wtf5	III	243855	244969	+
SPAPB8E5.05	65.237	-0.742893	0.32477	-2.28744	0.0221701	0.253692	84.1073	79.2549	48.0289	49.5567	mfm1	M-factor precursor Mfm1	I	4917099	4917298	+
SPCC338.14	2932.44	-0.156825	0.0686926	-2.283	0.0224304	0.256097	2998.75	3184.07	2812.58	2734.36	ado1	adenosine kinase (predicted)	III	1350062	1351084	-
SPAC17C9.16c	3055.47	0.193917	0.0849731	2.2821	0.0224835	0.256131	2999.83	2701.6	2993.16	3527.27	mfs1	plasma membrane spermidine transmembrane transporter Mfs1 (predicted)	I	4472611	4474259	+
SPAC1F8.06	149.015	0.497668	0.218735	2.27521	0.0228931	0.260219	128.318	118.882	166.18	182.68	pfl8	cell surface glycoprotein, flocculin Pfl8	I	100011	101168	+
SPAC3G6.07	121.109	0.548606	0.242607	2.26129	0.0237411	0.266225	90.5771	106.003	147.929	139.925	SPAC3G6.07	Schizosaccharomyces specific protein	I	5392273	5392650	+
SPAC27F1.06c	546.375	0.277392	0.122683	2.26105	0.0237563	0.266225	519.74	468.595	584.993	612.171	ani2	CENP-A amino terminus domain (NTD) isomerase Ani2	I	4327283	4328371	-
SPAC1565.06c	864.665	0.224243	0.0990721	2.26344	0.0236089	0.266225	794.706	800.475	944.249	919.228	spg1	GTPase Spg1	I	1300144	1301018	-
SPAC24C9.12c	48783.8	-0.107975	0.0477644	-2.26057	0.0237859	0.266225	51026.2	50191.1	46471.8	47446.2	shm1	serine hydroxymethyltransferase Shm1 (predicted)	I	3069614	3071017	-
SPBC215.09c	2618.39	-0.158542	0.0700799	-2.2623	0.023679	0.266225	2796.03	2728.35	2407.21	2541.97	erg10	acetyl-CoA C-acetyltransferase Erg10 (predicted)	II	4045979	4047226	-
SPBC24C6.04	2432.18	-0.169395	0.0747762	-2.26535	0.0234909	0.266225	2518.91	2630.27	2189.16	2390.38	put2	delta-1-pyrroline-5-carboxylate dehydrogenase Put2 (predicted)	II	2325256	2326902	+
SPBC1683.11c	454.55	-0.29516	0.130536	-2.26115	0.0237503	0.266225	516.505	485.436	416.891	399.369	SPBC1683.11c	isocitrate lyase (predicted)	II	166792	168348	-
SPBC26H8.01	189875	-0.117295	0.051941	-2.25824	0.023931	0.267264	192003	203176	186377	177945	thi2	thiazole biosynthetic enzyme	II	3940574	3941560	+
SPAC1002.20	7.80222	2.34065	1.03966	2.25137	0.0243622	0.268467	2.1566	2.97206	13.4481	12.6321	SPAC1002.20	Schizosaccharomyces pombe specific protein	I	1823972	1824277	+
SPBC947.09	162.932	0.487051	0.216571	2.24893	0.0245172	0.268467	117.535	153.556	191.155	189.481	hsp3103	ThiJ domain protein, implicated in cellular detoxification	II	656323	657108	-
SPCC594.05c	214.778	0.419193	0.186254	2.25065	0.0244079	0.268467	168.215	199.128	243.987	247.783	spf1	Set1C PHD finger subunit Spf1	III	364204	365478	-
SPCC24B10.06	621.653	0.255917	0.113606	2.25267	0.0242798	0.268467	559.637	573.607	689.696	663.671	SPCC24B10.06	Schizosaccharomyces specific protein, predicted GPI anchor	III	910510	911259	+
SPBC20F10.03	1204.41	0.210095	0.0933165	2.25142	0.024359	0.268467	1147.31	1086.78	1362.1	1221.43	SPBC20F10.03	Armadillo-type fold protein, human IFRD1 ortholog, implicated in transcription or signaling	II	3287750	3289090	+
SPBC1105.02c	7018.06	0.123513	0.0549269	2.24868	0.0245329	0.268467	6730.74	6704.96	7318.65	7317.87	lys4	homocitrate synthase	II	3506051	3507307	-
SPBC19F5.03	1741.5	-0.175698	0.0780889	-2.24997	0.0244509	0.268467	1807.23	1887.26	1612.81	1658.69	sac11	inositol polyphosphate phosphatase (predicted)	II	3706732	3708528	+
SPAC17A5.08	1496.14	-0.193279	0.085709	-2.25506	0.0241298	0.268467	1577.55	1614.82	1467.76	1324.43	erp2	COPII-coated vesicle component Erp2/3/4 (predicted)	I	1767787	1768419	+
SPCC16A11.16c	851.096	-0.226256	0.100457	-2.25227	0.0243053	0.268467	937.042	898.552	799.202	769.586	rpn1302	19S proteasome regulatory subunit Rpn13b	III	897682	899155	-
SPAC22A12.06c	658.916	-0.249878	0.111146	-2.2482	0.0245635	0.268467	735.4	696.452	598.441	605.369	fsh2	serine hydrolase-like, human TSTD2 and OVCA2 ortholog, unknown biological role, implicated in co-factor metabolism	I	1163936	1165225	-
SPBC17G9.12c	98.5599	0.603892	0.269107	2.24406	0.0248287	0.270787	86.2639	70.3387	121.033	116.604	SPBC17G9.12c	HAD superfamily hydrolase, unknown role (predicted)	II	2195200	2196024	-
SPAC6F12.13c	3647.36	-0.141194	0.0629739	-2.24209	0.0249553	0.271588	3820.41	3830.98	3517.64	3420.38	fps1	geranyltranstransferase Fps1	I	1338452	1339700	-
SPAC1142.04	479.403	0.285335	0.127414	2.23943	0.0251277	0.272884	446.416	418.07	520.634	532.492	noc201	Noc complex subunit Noc201 (predicted)	I	3631536	3633659	+
SPAC29A4.18	795.493	-0.231074	0.103258	-2.23784	0.0252314	0.273429	856.169	861.897	709.868	754.039	prw1	Clr6 histone deacetylase complex subunit Prw1	I	5110432	5111874	-
SPBC28F2.12	3008.09	0.150744	0.0674497	2.23491	0.0254231	0.274344	2796.03	2905.68	3102.67	3227.99	rpb1	RNA polymerase II large subunit Rpb1	II	1591154	1596710	+
SPBC337.09	1284.2	-0.197838	0.0885042	-2.23535	0.0253943	0.274344	1311.21	1432.53	1195.92	1197.13	erg28	Erg28 protein (predicted)	II	1047535	1048120	+
SPAC13G7.13c	370.159	-0.3184	0.142553	-2.23355	0.0255128	0.274733	406.519	415.098	317.952	341.067	msa1	RNA-binding protein Msa1	I	2318638	2320239	-
SPAC14C4.01c	1127.93	-0.200916	0.0901979	-2.2275	0.0259141	0.278468	1199.07	1213.59	1074.89	1024.17	SPAC14C4.01c	DUF1770 family protein	I	5225237	5225971	-
SPAC1250.05	578.943	0.273367	0.122817	2.2258	0.0260273	0.279098	486.313	561.719	615.731	652.011	rpl3002	60S ribosomal protein L30 (predicted)	I	5095211	5095810	-
SPBC1539.03c	1756.86	-0.175331	0.0788475	-2.22367	0.0261708	0.279465	1812.62	1914.01	1683.89	1616.91	arg41	argininosuccinate lyase (predicted)	II	4365385	4366767	-
SPBC1773.14	308.873	-0.350519	0.157598	-2.22413	0.0261399	0.279465	367.7	324.945	280.489	262.359	arg7	argininosuccinate lyase	II	313297	314682	+
SPAC31G5.02	261.589	0.373502	0.168148	2.22127	0.0263325	0.280078	233.991	221.914	281.45	309.001	rot1	ER chaperone Rot1 (predicted)	I	2990973	2991946	+
SPAC29B12.05c	197.283	-0.422014	0.189994	-2.2212	0.0263377	0.280078	233.991	217.951	167.141	170.047	mtq1	mitochondrial N(5)-glutamine methyltransferase (predicted)	I	5416351	5417280	-
SPAC17A2.11	113.816	0.566517	0.25539	2.21824	0.0265384	0.281044	102.438	81.2363	125.836	145.755	SPAC17A2.11	Schizosaccharomyces pombe specific protein	I	3577109	3577762	+
SPAC4F8.07c	9841.64	-0.123838	0.0558138	-2.21877	0.0265025	0.281044	10183.5	10343.8	9146.63	9692.71	hxk2	hexokinase 2	I	2665816	2667183	+
SPAC922.03	657.41	-0.244342	0.110285	-2.21555	0.0267224	0.282407	710.599	715.275	602.283	601.482	SPAC922.03	1-aminocyclopropane-1-carboxylate deaminase (predicted)	I	5476877	5477957	+
SPBC1539.06	1466.3	-0.192192	0.086792	-2.2144	0.0268016	0.28266	1480.5	1646.52	1348.65	1389.53	acb1	fatty-acyl-CoA binding protein Acb1 (predicted)	II	4372917	4373237	+
SPCC4G3.10c	150.773	0.482243	0.217986	2.21227	0.0269483	0.283214	120.769	130.771	185.392	166.161	rhp42	DNA repair protein Rhp42	III	452369	454429	+
SPAC8C9.10c	431.282	0.314383	0.142136	2.21185	0.0269771	0.283214	407.597	361.6	438.985	516.944	rrp14	ribosome biogenesis protein Rrp14 (predicted)	I	3658467	3659021	-
SPAC2F3.03c	584.993	0.25749	0.116447	2.21122	0.0270203	0.283214	520.818	544.877	638.785	635.492	rpa49	DNA-directed RNA polymerase I complex subunit Rpa49 (predicted)	I	3925983	3927260	-
SPBC725.15	813.324	0.228041	0.103347	2.20655	0.0273455	0.285712	735.4	762.828	907.747	847.322	ura5	orotate phosphoribosyltransferase Ura5	II	1231079	1231726	+
SPBC800.14c	523.532	-0.281029	0.127382	-2.2062	0.0273702	0.285712	567.185	581.533	508.146	437.265	SPBC800.14c	mitochondrial DUF1772 family protein, multimembrane spanning anthrone oxygenase-like	II	269707	270189	-
SPCC1281.06c	9492.09	0.129799	0.0588988	2.20377	0.0275408	0.286907	8794.61	9335.24	9626.92	10211.6	ole1	acyl-coA desaturase (predicted)	III	1392690	1394129	-
SPBC2D10.09	664.587	-0.241458	0.109842	-2.19823	0.0279325	0.290396	714.912	725.182	609.968	608.284	snr1	3-hydroxyisobutyryl-CoA hydrolase snr1	II	2981062	2982351	+
SPAC26A3.10	1039.04	0.210051	0.0956234	2.19665	0.0280451	0.290975	1008.21	919.357	1133.48	1095.11	cnt6	centaurin ADP ribosylation factor GTPase activating protein family (predicted)	I	3352515	3355615	+
SPAC4F8.13c	917.52	0.218005	0.0994322	2.19249	0.0283438	0.293479	876.657	820.288	956.737	1016.4	rng2	RasGAP GTPase activating protein IQGAP Rng2	I	2645517	2649986	+
SPAC18B11.09c	295.545	0.373485	0.170868	2.18581	0.0288292	0.297301	267.418	247.672	292.016	375.076	SPAC18B11.09c	serine O-acetyltransferase activity (predicted)	I	303161	304019	+
SPAC2G11.07c	4915.82	-0.133404	0.0610308	-2.18585	0.0288264	0.297301	5063.69	5221.91	4800.01	4577.68	ptc3	MAP kinase threonine phosphatase, protein phosphatase 2c homolog Ptc3	I	820163	821704	-
SPAC23C11.16	695.424	0.245579	0.112457	2.18376	0.0289799	0.298254	658.841	614.225	791.517	717.115	plo1	Polo kinase Plo1	I	2164240	2166291	+
SPAC15A10.06	888.364	-0.215583	0.0987943	-2.18214	0.0290993	0.298463	967.234	942.143	842.428	801.652	SPAC15A10.06	CPA1 sodium ion/proton antiporter (predicted)	I	3688782	3691125	+
SPAC1399.05c	510.148	-0.274082	0.125616	-2.1819	0.0291169	0.298463	581.203	535.961	476.447	446.982	toe1	DNA-binding transcription factor, zf-fungal binuclear cluster type	I	1838587	1840293	+
SPAC17A2.13c	6337.46	-0.124782	0.0572256	-2.18053	0.0292181	0.298901	6584.09	6638.59	6181.33	5945.83	rad25	14-3-3 protein Rad25	I	3583250	3584779	-
SPBC211.01	339.536	0.322084	0.148076	2.17513	0.0296206	0.301912	309.472	294.234	385.192	369.246	rsm10	mitochondrial ribosomal protein subunit S10 (predicted)	II	3870293	3871045	+
SPAC167.03c	353.248	0.319675	0.14719	2.17186	0.0298665	0.301912	324.568	304.141	409.207	375.076	snu66	U4/U6 x U5 tri-snRNP complex subunit Snu66	I	1555134	1557083	+
SPAC1093.05	540.933	0.264146	0.121546	2.17322	0.0297636	0.301912	506.801	476.52	605.165	575.246	hca4	ATP-dependent RNA helicase Hca4 (predicted)	I	4619693	4621900	+
SPAC56E4.03	3878.98	-0.159007	0.0731598	-2.17342	0.0297489	0.301912	3815.02	4368.93	3650.2	3681.77	SPAC56E4.03	aromatic aminotransferase (predicted)	I	1244051	1245475	+
SPAC1142.07c	766.591	-0.231795	0.106723	-2.17194	0.0298602	0.301912	838.917	817.316	738.685	671.445	vps32	ESCRT III complex subunit Vps32	I	3638771	3639560	-
SPCC550.07	306.507	-0.341651	0.157164	-2.17386	0.029716	0.301912	323.49	361.6	277.607	263.331	fah2	fatty-acid amide hydrolase (predicted)	III	1198190	1199791	+
SPCC24B10.13	173.656	0.448579	0.207148	2.1655	0.0303493	0.306186	154.197	139.687	217.091	183.651	skb5	protein kinase activator Skb5	III	923069	923491	+
SPCC306.11	1160.61	0.2062	0.0952809	2.16413	0.0304546	0.306644	1071.83	1083.81	1323.68	1163.12	SPCC306.11	Schizosaccharomyces specific protein	III	430788	431639	+
SPBC1198.08	3455.79	-0.139067	0.0643387	-2.16148	0.0306584	0.30809	3549.76	3694.27	3293.83	3285.32	dug1	dipeptidase Dug1 (predicted)	II	187424	188979	+
SPAC1B9.03c	350.152	0.31738	0.146957	2.15967	0.0307979	0.308885	324.568	299.187	379.429	397.425	SPAC1B9.03c	RNA-binding protein involved in ribosomal large subunit assembly and maintenance (predicted)	I	2406664	2407951	+
SPAPB8E5.07c	856.427	0.22659	0.105164	2.15463	0.0311911	0.312216	827.055	751.931	880.851	965.87	rrp12	rRNA processing protein Rrp12 (predicted)	I	4919839	4923330	-
SPAC323.02c	2137.38	-0.161003	0.0748786	-2.15019	0.0315401	0.315093	2236.39	2276.6	2089.26	1947.29	pup2	20S proteasome complex subunit alpha 5, Pup2	I	3909389	3910371	-
SPAC1002.08c	327.49	0.323998	0.150882	2.14736	0.0317649	0.316721	281.436	300.178	372.705	355.642	mtf1	mitochondrial RNA polymerase specificity factor, predicted rRNA methyltransferase Mtf1	I	1810023	1811123	-
SPCC16C4.10	1871.58	-0.176287	0.0823519	-2.14066	0.0323019	0.321447	2014.26	1957.6	1861.6	1652.86	SPCC16C4.10	6-phosphogluconolactonase (predicted)	III	685901	686792	+
SPAC4G9.13c	630.345	-0.25559	0.119502	-2.13879	0.032453	0.322325	696.581	675.648	619.573	529.576	vps26	retromer complex subunit Vps26	I	2278242	2279234	-
SPCC1672.07	482.663	0.272696	0.12781	2.1336	0.0328756	0.325889	447.494	426.986	509.107	547.067	utp21	U3 snoRNP-associated protein Utp21 (predicted)	III	575537	578304	+
SPBP4H10.05c	1788.98	0.169611	0.0796117	2.13047	0.0331325	0.3278	1649.8	1717.85	1962.46	1825.82	spe2	S-adenosylmethionine decarboxylase proenzyme Spe2	II	2876233	2877369	-
SPBC1711.12	1619.27	-0.167948	0.0789107	-2.12833	0.0333098	0.328919	1733.9	1693.08	1516.75	1533.34	ppp16	serine-type peptidase activity	II	2157625	2159676	+
SPAC22E12.06c	405.299	-0.289919	0.136308	-2.12694	0.0334248	0.329417	439.946	451.753	357.335	372.161	gmh3	alpha-1,2-galactosyltransferase Gmh3	I	5029000	5029998	-
SPAC977.17	333.06	0.356139	0.167729	2.1233	0.0337285	0.331134	262.027	321.973	416.891	331.35	SPAC977.17	plasma membrane aquaporin family transmembrane transporter (predicted)	I	67143	68939	+
SPAC57A10.11c	1098.3	-0.193157	0.0909648	-2.12343	0.0337182	0.331134	1163.48	1179.91	1047.99	1001.82	mia40	mitochondrial Mia40-Erv1 disulfide relay system thiol oxidase subunit Mia40 (predicted)	I	1384077	1385086	-
SPBC19C2.11c	790.804	0.219276	0.10336	2.12148	0.0338814	0.331364	751.574	710.322	850.112	851.209	mdm34	ERMES complex subunit, membrane tether and lipid transfer protein Mdm34 (predicted)	II	1697735	1699093	-
SPAC6G10.08	3133.96	-0.140292	0.0661251	-2.12162	0.03387	0.331364	3268.32	3303.94	2916.32	3047.25	idp1	isocitrate dehydrogenase Idp1 (predicted)	I	3231536	3232855	+
SPAC2G11.11c	433.001	0.289066	0.13667	2.11507	0.0344244	0.335919	403.284	376.461	504.304	447.954	prh1	ATP-dependent RNA helicase Prh1 (predicted)	I	829214	831499	-
SPAC24H6.12c	560.018	-0.264255	0.124977	-2.11443	0.0344785	0.335919	594.143	628.095	547.53	470.303	uba3	NEDD8 activating enzyme E1-type Uba3	I	461939	463273	+
SPBC1711.10c	1341.9	-0.179151	0.0848207	-2.11212	0.0346762	0.337203	1427.67	1422.63	1289.1	1228.23	npl4	Hrd1p ubiquitin ligase complex Npl4 (predicted)	II	2152459	2154335	-
SPAC20G4.07c	933.156	0.203729	0.0966044	2.1089	0.034953	0.33925	851.856	882.701	985.554	1012.51	erg4	C-24(28) sterol reductase Erg4	I	4826683	4828044	-
SPBC31F10.16	2052.23	-0.162133	0.07706	-2.10399	0.0353793	0.342737	2153.36	2181.49	2022.02	1852.06	bch1	exomer complex ChAPs family (Chs5p-Arf1p-binding) protein Bch1	II	3785848	3788046	+
SPAC589.06c	3826.59	-0.134483	0.0639689	-2.10231	0.0355259	0.343425	3946.57	4062.8	3735.69	3561.28	snd302	SRP-independent ER targeting protein Snd3b (predicted)	I	3102969	3103719	-
SPAC6G9.12	689.843	-0.246988	0.117521	-2.10164	0.0355846	0.343425	709.521	787.596	585.953	676.303	cfr1	exomer complex BRCT domain subunit Cfr1	I	3270235	3272097	+
SPBC21B10.04c	2724.35	-0.159155	0.0759387	-2.09583	0.0360969	0.347713	2748.58	2999.8	2686.74	2462.29	nrf1	vacuolar transporter chaperone (VTC) complex, GTPase regulator subunit Nrf1	II	1664582	1664950	+
SPBC16A3.17c	1189.13	0.185113	0.0883831	2.09444	0.0362211	0.348254	1134.37	1091.74	1249.71	1280.7	SPBC16A3.17c	transmembrane transporter (predicted)	II	4265559	4267358	+
SPAC16.03c	574.042	-0.246213	0.117615	-2.09339	0.0363141	0.348493	628.648	617.198	511.028	539.293	ura2	dihydroorotase Ura2	I	4427715	4428805	-
SPCC569.06	1971.9	0.174763	0.0836521	2.08917	0.0366925	0.351465	1774.88	1929.86	2209.33	1973.52	SPCC569.06	Schizosaccharomyces specific multicopy membrane protein family 1	III	2420664	2422100	-
SPBPB2B2.18	8.99887	2.02311	0.968812	2.08823	0.0367767	0.351613	1.0783	5.94412	15.3693	13.6038	SPBPB2B2.18	conserved fungal plasma membrane protein	II	4502692	4503664	+
SPCC970.03	1240.17	-0.183337	0.0881894	-2.0789	0.0376263	0.359064	1297.19	1340.4	1196.88	1126.2	cbr1	NADH-dependent reductase for Dph3, Cbr1 (predicted)	III	510435	511340	-
SPAC29A4.11	564.501	-0.256473	0.123557	-2.07575	0.0379172	0.361167	645.901	583.514	541.767	486.822	rga3	RhoGAP, GTPase activating protein Rga3	I	5125929	5128838	-
SPAC3A11.12c	1628.71	-0.163615	0.078872	-2.07444	0.0380383	0.361422	1696.16	1745.59	1543.65	1529.46	rpt5	19S proteasome base subcomplex ATPase subunit Rpt5	I	3443944	3445445	+
SPAC17C9.09c	620.327	-0.234782	0.113206	-2.07394	0.0380853	0.361422	670.702	670.695	578.269	561.643	tim13	Tim8-Tim13 mitochondrial intermembrane space protein transporter complex subunit Tim13 (predicted)	I	4484078	4484466	+
SPCC1739.01	1653.2	-0.166086	0.0801623	-2.07187	0.0382774	0.362572	1801.84	1695.06	1539.81	1576.1	SPCC1739.01	zf-CCCH type zinc finger protein	III	2025579	2027330	+
SPBC4F6.12	128.38	0.484816	0.234122	2.07079	0.0383785	0.362858	111.065	103.031	155.614	143.812	pxl1	paxillin-like protein Pxl1	II	2712512	2713884	+
SPAC1B3.01c	957.047	-0.201381	0.0974221	-2.06709	0.0387254	0.365462	1006.05	1041.21	856.836	924.087	SPAC1B3.01c	uracil phosphoribosyltransferase (predicted)	I	4926946	4927918	-
SPAC4A8.09c	861.278	0.204294	0.0989437	2.06475	0.0389468	0.3662	803.333	797.502	924.077	920.2	cwf21	complexed with Cdc5 protein Cwf21	I	2563011	2563963	-
SPAC17H9.19c	927.205	-0.212923	0.103096	-2.0653	0.0388949	0.3662	1051.34	940.161	895.26	822.058	cdt2	WD repeat protein Cdt2	I	2034178	2035650	-
SPAC186.07c	3.89121	3.80165	1.84192	2.06396	0.0390218	0.366232	1.0783	0	7.68463	6.8019	SPAC186.07c	hydroxyacid dehydrogenase, implicated in cellular detoxification (predicted)	I	5545615	5546613	-
SPBC19F5.02c	485.676	0.261498	0.126977	2.05941	0.0394551	0.368945	450.729	432.93	512.949	546.095	utp4	U3 snoRNP-associated WD repeat protein Utp4 (predicted)	II	3703742	3705874	-
SPBC649.04	2565.81	0.147654	0.0716852	2.05976	0.0394214	0.368945	2467.15	2402.41	2790.48	2603.18	uvi15	tail anchored plasma membrane protein Uvi15	II	539418	539960	+
SPBC16D10.02	327.701	0.314995	0.153197	2.05614	0.0397686	0.371095	286.828	297.206	341.006	385.765	trm11	tRNA (guanine-N2-)-methyltransferase catalytic subunit Trm11 (predicted)	II	3588806	3590386	+
SPBC1289.07c	819.006	0.210098	0.102215	2.05546	0.0398344	0.371095	759.123	759.856	904.865	852.181	rpc40	DNA-directed RNA polymerase I and III subunit Rpc40	II	4396053	4397099	-
SPAC16.02c	2670.45	-0.144028	0.0700948	-2.05475	0.0399027	0.371095	2763.68	2843.27	2463.88	2610.96	srp2	splicing factor Srp2	I	4425250	4426965	-
SPBC24C6.06	1225.54	-0.213152	0.103822	-2.05306	0.0400667	0.371944	1455.7	1176.94	1123.88	1145.63	gpa1	G-protein alpha subunit	II	2330338	2331561	+
SPBC1718.03	350.59	0.300259	0.146305	2.05228	0.0401425	0.371972	323.49	305.131	396.719	377.02	ker1	DNA-directed RNA polymerase I complex subunit Ker1	II	3474729	3475172	+
SPAC20H4.11c	228.13	-0.36495	0.177995	-2.05034	0.040331	0.373043	249.087	264.513	206.524	192.397	rho5	Rho family GTPase Rho5	I	2131895	2132615	-
SPBC19C7.04c	282.791	0.356128	0.173813	2.04892	0.0404701	0.373655	239.382	256.588	277.607	357.586	SPBC19C7.04c	DUF2406 family conserved fungal protein	II	2825692	2826066	-
SPAP7G5.05	3314.35	0.131406	0.0642417	2.0455	0.0408059	0.376076	3190.69	3136.51	3437.91	3492.29	rpl1002	60S ribosomal protein L10	I	3744164	3744829	+
SPAC23C4.06c	226.251	-0.373315	0.182824	-2.04193	0.0411583	0.378641	249.087	261.541	179.628	214.746	efm6	elongation factor EF-1 alpha (eEF1A) lysine 390 methylase Efm6 (predicted)	I	1038666	1039649	-
SPAC664.08c	275.18	0.363218	0.178638	2.03327	0.0420254	0.383499	214.582	266.495	277.607	342.038	bfr2	traub family protein involved in ribosome biogenesis (predicted)	I	1716213	1717720	-
SPAC6G10.12c	443.881	0.305081	0.150071	2.03291	0.0420612	0.383499	428.085	366.554	549.451	431.435	ace2	DNA-binding transcription factor Ace2	I	3239366	3240967	-
SPBP8B7.25	4257.38	-0.132049	0.0648643	-2.03578	0.0417729	0.383499	4488.96	4415.49	4220.78	3904.29	cyp4	cyclophilin family peptidyl-prolyl cis-trans isomerase Cyp4	II	3685901	3686599	+
SPAC3C7.14c	7827.35	-0.133853	0.0657879	-2.03462	0.0418895	0.383499	7785.32	8594.2	7745.15	7184.75	obr1	NAD(P)H dehydrogenase (quinone) (predicted)	I	2094283	2094891	-
SPBC29A10.16c	1354.86	-0.178068	0.0875385	-2.03417	0.0419348	0.383499	1381.3	1494.95	1237.23	1305.96	SPBC29A10.16c	cytochrome b5 (predicted)	II	2574822	2575428	-
SPAC9E9.10c	918.863	0.201948	0.099427	2.03112	0.0422432	0.384473	887.44	822.27	1007.65	958.096	cbh1	CENP-B homolog Cbh1	I	4459225	4460769	-
SPAC890.03	596.061	0.237865	0.117227	2.0291	0.0424481	0.385651	568.264	526.054	630.14	659.784	ppk16	serine/threonine protein kinase Ppk16 (predicted)	I	5004671	5006971	+
SPCC70.05c	1325.59	-0.179377	0.0885442	-2.02585	0.0427805	0.387982	1471.88	1344.36	1216.09	1270.01	nnk1	serine/threonine protein kinase Nnk1 (predicted)	III	2359078	2361423	-
SPBC1289.16c	729.424	0.230007	0.113656	2.02372	0.0429987	0.389271	649.136	693.48	843.388	731.69	cao2	copper amine oxidase-like protein Cao2	II	4426235	4428619	-
SPCC1442.08c	1387.42	-0.176473	0.0872366	-2.02292	0.0430811	0.389328	1543.05	1401.82	1285.25	1319.57	cox12	cytochrome c oxidase protein VIb (predicted)	III	1781505	1782032	-
SPAC823.04	301.698	0.318801	0.157873	2.01935	0.0434511	0.391979	283.593	253.616	328.518	341.067	rrp36	rRNA processing protein Rrp36 (predicted)	I	2587729	2588620	+
SPAC26F1.03	6236.73	-0.113477	0.056249	-2.0174	0.0436535	0.393112	6430.98	6532.59	6012.26	5971.1	pda1	pyruvate dehydrogenase e1 component alpha subunit Pda1 (predicted)	I	5179831	5181060	-
SPAC13G6.11c	1062.42	-0.187522	0.0929896	-2.01659	0.043738	0.393181	1093.4	1169.01	995.16	992.106	erg12	mevalonate kinase Erg12 (predicted)	I	194119	195582	-
SPAC869.06c	3.59129	-3.79567	1.88532	-2.01328	0.0440856	0.39561	6.46979	6.9348	0.960579	0	hry1	HHE domain cation binding protein (predicted)	I	5502575	5503186	+
SPCC895.05	244.835	0.363042	0.180635	2.00981	0.0444515	0.398195	211.347	216.96	244.948	306.085	for3	formin For3	III	1003130	1007515	+
SPBC8D2.09c	94.9108	0.569222	0.283926	2.00482	0.0449818	0.402241	61.463	91.1431	113.348	113.689	msl1	U2 snRNP-associated protein Msl1 (predicted)	II	1375313	1375721	-
SPAC1565.05	337.546	0.298259	0.149035	2.00127	0.0453637	0.402487	294.376	311.075	384.232	360.501	utp8	t-UTP complex subunit Utp8 (predicted)	I	1297390	1299711	+
SPAC607.08c	664.814	0.222747	0.111197	2.00318	0.0451577	0.402487	618.944	608.281	693.538	738.492	mil1	lipase/AP-1 adaptor complex binding protein Mil1 (predicted)	I	2048421	2050160	-
SPBP23A10.07	906.121	0.197221	0.0985371	2.00149	0.0453401	0.402487	818.429	869.823	954.815	981.417	rpa2	DNA-directed RNA polymerase I complex subunit Rpa2	II	2008119	2011643	+
SPBC16C6.08c	3254.05	-0.135946	0.0679425	-2.0009	0.0454027	0.402487	3278.03	3535.76	3101.71	3100.69	qcr6	ubiquinol-cytochrome-c reductase complex subunit 8, hinge protein (predicted)	II	4344557	4345430	-
SPCC70.07c	391.533	-0.284048	0.141816	-2.00293	0.045185	0.402487	411.91	447.79	335.242	371.189	tmp1	thymidylate kinase Tmp1	III	2366564	2367341	-
SPAC5H10.07	18.7529	1.29203	0.64679	1.99761	0.0457591	0.403548	11.8613	9.90686	17.2904	35.9529	SPAC5H10.07	Schizosaccharomyces pombe specific protein	I	159203	159472	+
SPAC2G11.02	561.423	0.25014	0.125194	1.99801	0.0457152	0.403548	545.619	480.483	578.269	641.322	urb2	ribosome biogenesis protein Urb2 (predicted)	I	808028	812042	+
SPCC1682.15	1091.23	0.18689	0.0934945	1.99894	0.0456145	0.403548	1059.97	981.77	1189.2	1133.97	mug122	PX/PXA domain protein	III	402249	404498	+
SPAC22H10.09	480.262	0.263019	0.131794	1.99569	0.0459681	0.404694	459.355	414.107	495.659	551.926	SPAC22H10.09	Schizosaccharomyces specific protein	I	2387733	2389673	+
SPAC18G6.05c	738.943	-0.215856	0.108206	-1.99487	0.0460567	0.404777	821.664	766.791	659.918	707.398	gcn1	translation initiation regulator Gcn1	I	2219255	2227340	-
SPAC27E2.13	10045	0.108991	0.0546815	1.99319	0.0462407	0.405002	9547.26	9784.02	10649.9	10199	NA	NA	NA	NA	NA	NA
SPBC16E9.02c	1850.94	-0.151923	0.0762024	-1.99368	0.0461872	0.405002	1926.92	1969.48	1721.36	1785.98	SPBC16E9.02c	CUE domain protein, human TOLLIP ortholog	II	1918161	1920173	-
SPBC530.08	1061.49	0.185859	0.0933704	1.99055	0.0465302	0.406147	959.686	1026.35	1112.35	1147.58	SPBC530.08	DNA-binding transcription factor, membrane-tethered (predicted)	II	806834	809281	+
SPBC17G9.06c	1438.04	-0.18078	0.0907933	-1.99112	0.0464677	0.406147	1468.64	1587.08	1430.3	1266.12	sib3	siderophore-iron biosynthesis protein Sib3 (predicted)	II	2179488	2180492	-
SPCC4B3.01	1255.52	-0.176009	0.0884642	-1.98961	0.0466338	0.406357	1357.58	1306.72	1219.94	1137.86	tum1	thiosulfate sulfurtransferase, involved in tRNA wobble position thiolation Tum1 (predicted)	III	1177872	1178825	-
SPCC1322.05c	1406	-0.165658	0.0833165	-1.9883	0.0467785	0.406925	1491.29	1482.07	1354.42	1296.25	lap2	vacuolar aminopeptidase Lap2	III	1294076	1295914	-
SPCC126.03	367.117	0.281703	0.142053	1.98309	0.0473574	0.407115	328.881	333.861	403.443	402.284	pus1	TruA family tRNA/ U2 snRNA pseudouridine synthase Lsp1	III	2120665	2122373	+
SPBC342.05	562.405	0.235929	0.118917	1.98399	0.0472575	0.407115	521.897	511.194	590.756	625.775	crb2	DNA repair protein Rad9 homolog Crb2	II	4211087	4213423	+
SPAC23C4.15	700.383	0.216062	0.108924	1.98361	0.0472994	0.407115	649.136	646.918	728.119	777.36	rpb5	DNA-directed RNA polymerase I, II and III subunit Rpb5	I	1054735	1055642	+
SPBC29B5.01	1049.89	0.195404	0.0983921	1.98598	0.047036	0.407115	948.903	1008.52	1055.68	1186.45	atf1	DNA-binding transcription factor, Atf-CREB family Atf1	II	1547661	1549361	+
SPAC1635.01	8035.01	-0.125444	0.0632244	-1.98411	0.0472439	0.407115	8238.2	8529.81	8079.43	7292.61	por1	mitochondrial outer membrane voltage-dependent anion-selective channel Por1 (predicted)	I	4649258	4650106	+
SPBC646.16	2055.73	-0.15322	0.077205	-1.98459	0.0471903	0.407115	2082.2	2246.88	1994.16	1899.67	scl1	20S proteasome complex subunit alpha 1	II	957658	958392	+
SPAC6F12.02	716.759	-0.220855	0.11128	-1.98468	0.0471802	0.407115	774.219	768.773	620.534	703.511	rst2	DNA-binding transcription factor Rst2	I	1310980	1312683	+
SPBC19G7.13	460.68	0.265956	0.134228	1.98138	0.0475491	0.408076	450.729	386.368	511.028	494.595	tbf1	DNA binding factor Trf1	II	2374174	2375631	+
SPAC1002.12c	1054.03	-0.182698	0.0923782	-1.97772	0.0479603	0.410229	1141.92	1099.66	1001.88	972.672	SPAC1002.12c	succinate-semialdehyde dehydrogenase [NAD(P)+] (predicted)	I	1818695	1820338	-
SPCC1795.06	3714.37	-1.06099	0.536419	-1.97791	0.0479394	0.410229	6828.87	3214.78	2177.63	2636.22	map2	P-factor pheromone Map2	III	986079	986684	-
SPBC3B9.01	1980.29	-0.14737	0.0745471	-1.97687	0.0480561	0.410362	2123.17	2039.82	1879.85	1878.3	fes1	Hsp70 nucleotide exchange factor Fes1 (predicted)	II	3990667	3991530	+
SPBC3D6.16	681.995	0.216711	0.109702	1.97545	0.0482169	0.411049	614.63	646.918	743.488	722.945	SPBC3D6.16	dubious	II	1296915	1297260	+
SPBPB2B2.12c	874.219	-0.204625	0.103627	-1.97464	0.0483094	0.411152	990.957	881.711	796.32	827.888	gal10	UDP-glucose 4-epimerase/aldose 1-epimerase Gal10	II	4485277	4487418	-
SPAPJ695.02	101.014	0.565297	0.286594	1.97247	0.0485564	0.412517	63.6196	99.0686	134.481	106.887	SPAPJ695.02	Schizosaccharomyces pombe specific protein	I	75698	75910	-
SPBC14F5.04c	50492.4	-0.0932392	0.0472861	-1.97181	0.048631	0.412517	51668.9	52577.7	48664.9	49058.2	pgk1	phosphoglycerate kinase Pgk1 (predicted)	II	4158172	4159416	-
SPAC1420.02c	2175.09	0.144732	0.0734919	1.96936	0.0489115	0.41421	2005.64	2126.01	2285.22	2283.49	cct5	chaperonin-containing T-complex epsilon subunit Cct5	I	1263902	1265542	-
SPBC776.16	100.885	0.520864	0.264854	1.9666	0.049229	0.4153	90.5771	75.2922	118.151	119.519	mis20	centromere protein Mis20/Eic2	II	3210022	3210783	+
SPBC23G7.05	3119.6	-0.137579	0.0699747	-1.96613	0.0492839	0.4153	3122.75	3412.91	2952.82	2989.92	sui1	translation initiation factor eIF1	II	2105626	2106170	+
SPAC19G12.12	486.986	-0.250205	0.127217	-1.96675	0.0492116	0.4153	540.228	518.129	462.038	427.548	dlp1	decaprenyl diphosphate synthase subunit 2 Dlp1	I	4068756	4069640	+
SPBC106.17c	1516.89	-0.170948	0.0870091	-1.96472	0.0494467	0.415425	1509.62	1702.99	1419.74	1435.2	cys2	homoserine O-acetyltransferase (predicted)	II	411120	412634	-
SPBC1289.05c	1047.02	-0.182461	0.0928745	-1.96459	0.0494612	0.415425	1098.79	1127.4	1004.77	957.124	vma10	V-type ATPase V1 domain subunit G (predicted)	II	4392091	4392610	-
SPAC222.09	788.673	0.208809	0.106381	1.96284	0.0496649	0.415771	747.261	716.266	804.005	887.162	seb1	RNA-binding and 3'-end processing protein Seb1	I	960061	962113	+
SPAC26H5.08c	973.181	0.197291	0.100506	1.96298	0.0496484	0.415771	896.067	917.375	1104.67	974.615	bgl2	glucan beta-glucosidase Bgl2 (predicted)	I	4134622	4135587	-
SPAC328.09	359.27	0.292597	0.149578	1.95615	0.0504479	0.421636	300.845	344.759	375.586	415.888	SPAC328.09	mitochondrial carrier, 2-oxoadipate/2-oxoglutarate (predicted)	I	3494710	3495877	+
SPBC8D2.01	1461.53	-0.167911	0.0859715	-1.9531	0.0508082	0.423954	1590.49	1502.87	1434.14	1318.6	gsk31	serine/threonine protein kinase Gsk31 (predicted)	II	1358692	1360439	+
SPAC1002.01	104.979	0.506663	0.259757	1.95053	0.051113	0.424421	86.2639	87.1804	113.348	133.123	mrx11	mitochondrial expression network (MIOREX) component Mrx11	I	1798347	1799015	+
SPCC550.01c	273.874	0.317594	0.162729	1.95168	0.0509761	0.424421	248.009	239.746	298.74	309.001	coa4	cytochrome c oxidase assembly protein Coa4 (predicted)	III	1185888	1186167	-
SPCC794.07	4692.5	-0.119714	0.0613586	-1.95105	0.0510506	0.424421	4901.95	4872.2	4376.4	4619.46	lat1	dihydrolipoamide S-acetyltransferase E2, Lat1 (predicted)	III	262811	264399	+
SPCC1322.01	292.549	0.335317	0.172746	1.94109	0.0522473	0.433136	287.906	229.839	297.779	354.67	rpm1	mitochondrial 3'-5' exonuclease for RNA 3' ss-tail	III	1283162	1286035	+
SPCC4G3.04c	1086.68	-0.176914	0.0911915	-1.94002	0.0523767	0.433506	1161.33	1145.23	1041.27	998.907	coq5	C-methyltransferase (predicted)	III	464937	465983	+
SPAC57A7.07c	474.817	-0.25369	0.131092	-1.93521	0.0529643	0.437661	520.818	512.185	462.038	404.227	SPAC57A7.07c	homocysteine methyltransferase (predicted)	I	1530189	1531115	+
SPAC750.01	69.6012	0.607053	0.314423	1.93069	0.0535213	0.441551	52.8367	57.4598	83.5704	84.5379	SPAC750.01	NADP-dependent aldo/keto reductase, unknown biological role, implicated in cellular detoxification	I	5555791	5556768	+
SPAC57A10.14	431.408	-0.259142	0.134464	-1.92722	0.0539517	0.444384	489.548	450.762	403.443	381.878	sgf11	SAGA complex deubiquitinating submodule subunit Sgf11	I	1371718	1372307	-
SPBC3D6.02	1744.17	0.164418	0.0856003	1.92077	0.0547613	0.450328	1560.3	1728.75	1759.78	1927.85	but2	But2 family protein But2, similar to cell surface molecules	II	1269748	1270920	+
SPBC1652.02	431.085	0.25435	0.1325	1.91962	0.0549061	0.450794	386.031	400.237	470.684	467.388	SPBC1652.02	APC amino acid transmembrane transporter (predicted)	II	4256509	4258293	+
SPBC409.15	524.818	0.232712	0.121483	1.9156	0.0554162	0.454253	477.686	487.418	570.584	563.586	tsr2	rRNA processing protein Tsr2 (predicted)	II	1167534	1168334	+
SPAC1002.03c	1365.91	0.163406	0.0854255	1.91285	0.0557677	0.455674	1299.35	1277.99	1395.72	1490.59	gls2	glucosidase II alpha subunit Gls2	I	1800212	1802983	-
SPAC922.05c	255.544	-0.323558	0.169091	-1.91352	0.0556821	0.455674	272.81	295.225	220.933	233.208	SPAC922.05c	transmembrane transporter (predicted)	I	5483049	5484563	-
SPBC1198.02	479.216	0.244026	0.127882	1.90821	0.0563642	0.458594	436.711	440.855	539.845	499.454	dea2	adenine deaminase Dea2	II	174842	175945	+
SPBC32H8.05	668.436	0.209206	0.109648	1.90798	0.0563941	0.458594	618.944	621.16	722.355	711.284	SPBC32H8.05	UPF0642 conserved fungal protein	II	1460575	1461067	+
SPBC887.04c	1413.52	-0.161807	0.0847906	-1.90831	0.0563506	0.458594	1453.55	1531.6	1369.79	1299.16	lub1	WD repeat protein Lub1	II	3546238	3548505	-
SPAC521.04c	967.25	-0.183301	0.0961145	-1.90711	0.0565068	0.458643	1030.85	1026.35	876.048	935.747	sst1	ER membrane calcium trnamembrane transporter (predicted)	I	846331	848976	-
SPAC644.08	621.198	-0.223305	0.117136	-1.90637	0.0566023	0.458643	670.702	667.723	608.046	538.322	utr4	methionine salvage haloacid dehalogenase-like hydrolase Utr4 (predicted)	I	2688195	2688898	+
SPBP4H10.09	221.373	-0.342646	0.179786	-1.90585	0.0566691	0.458643	253.4	241.727	190.195	200.17	rsv1	DNA-binding transcription factor Rsv1	II	2888450	2889736	+
SPAC31G5.09c	1665.24	-0.47849	0.251679	-1.90119	0.0572768	0.462829	2273.05	1604.91	1340.01	1442.97	spk1	MAP kinase Spk1	I	2999850	3000968	-
SPAC19G12.07c	590.74	0.243388	0.128134	1.89949	0.0575002	0.463171	552.089	530.017	574.426	706.426	rsd1	RNA-binding protein Rsd1 (predicted)	I	4053810	4056017	-
SPAC24B11.06c	2549.4	0.136285	0.0717308	1.89996	0.0574388	0.463171	2357.16	2500.49	2730.93	2609.01	sty1	MAP kinase Sty1	I	206864	207913	-
SPCC70.04c	193.883	-0.363629	0.191681	-1.89705	0.0578215	0.465027	226.443	210.025	172.904	166.161	SPCC70.04c	Schizosaccharomyces pombe specific protein	III	2353571	2354409	-
SPCC777.09c	3425.54	-0.133255	0.0703276	-1.89478	0.0581216	0.466707	3423.6	3742.81	3180.48	3355.28	arg1	acetylornithine aminotransferase	III	1613324	1614897	-
SPBC1348.05	3.40536	3.59303	1.8976	1.89346	0.0582963	0.466949	1.0783	0	7.68463	4.8585	SPBC1348.05	transmembrane transporter (predicted)	II	13572	15029	+
SPBC725.16	365.566	0.271492	0.143529	1.89155	0.0585512	0.466949	325.646	336.833	413.049	386.737	res1	MBF transcription factor complex subunit Res1	II	1233335	1235375	+
SPAC23C11.03	742.468	0.201995	0.106811	1.89115	0.0586039	0.466949	711.677	669.704	776.148	812.341	mpp10	U3 snoRNP-associated protein Mpp10 (predicted)	I	2136145	2137941	+
SPAC110.04c	7972.33	-0.103832	0.0548673	-1.89242	0.0584349	0.466949	8246.83	8271.24	7561.68	7809.55	pss1	heat shock protein Pss1	I	1917998	1920160	-
SPAC926.09c	4590.43	-0.146002	0.0772042	-1.89112	0.0586083	0.466949	4936.45	4708.73	3996.97	4719.55	fas1	fatty acid synthase beta subunit Fas1	I	3900367	3906588	-
SPAC1D4.08	1171.32	0.168629	0.089212	1.8902	0.0587309	0.467199	1133.29	1072.91	1236.27	1242.8	pis1	CDP-diacylglycerol--inositol 3-phosphatidyltransferase Pis1	I	650488	651848	+
SPAC27D7.07c	620.331	0.213316	0.113054	1.88685	0.0591807	0.46859	571.499	577.57	666.642	665.614	smd1	Sm snRNP core protein Smd1	I	4520538	4520990	-
SPBC1703.13c	4694.95	-0.111522	0.0590998	-1.88701	0.0591591	0.46859	4855.58	4896.96	4517.6	4509.66	SPBC1703.13c	mitochondrial carrier, inorganic phosphate (predicted)	II	2940031	2940966	-
SPCC1753.02c	511.116	-0.238775	0.126472	-1.88797	0.0590303	0.46859	520.818	585.496	463.96	474.19	git3	G-protein coupled receptor Git3	III	1543181	1544581	-
SPBC651.01c	1140.29	0.169564	0.0900173	1.88369	0.0596073	0.471238	1099.87	1047.16	1219.94	1194.22	nog1	ribosome export GTP binding protein Nog1 (predicted)	II	1236884	1239176	-
SPCC1442.13c	108.654	0.482623	0.256712	1.88002	0.0601053	0.47275	99.2035	82.227	121.033	132.151	sqs2	R3H and G-patch domain protein Sqs2	III	1791346	1791909	-
SPAP32A8.02	1444.91	0.163192	0.0867805	1.88051	0.0600387	0.47275	1369.44	1357.24	1606.09	1446.86	SPAP32A8.02	xylose and arabinose reductase (predicted)	I	3406215	3407066	+
SPAC25G10.01	1103.38	-0.179616	0.0955628	-1.87956	0.0601682	0.47275	1144.08	1199.72	1092.18	977.53	SPAC25G10.01	RNA-binding protein involved in histone acetylation	I	4295376	4296269	+
SPAC12B10.13	863.98	-0.18692	0.0994485	-1.87957	0.0601671	0.47275	900.38	939.171	802.083	814.284	gid8	GID complex subunit Gid8 (predicted)	I	4596439	4597269	+
SPAC5H10.06c	887.046	0.224728	0.119838	1.87526	0.060757	0.473805	728.93	906.478	882.772	1030	adh4	alcohol dehydrogenase Adh4	I	156548	157687	-
SPCC320.05	806.485	0.192451	0.102593	1.87586	0.0606742	0.473805	752.653	752.922	883.733	836.634	SPCC320.05	sulfate transmembrane transporter (predicted)	III	159993	161996	-
SPBC3B9.15c	1127.27	0.168382	0.0898177	1.87471	0.0608324	0.473805	1048.11	1074.89	1209.37	1176.73	scp1	Sre1 cleavage activating protein, Scap Scp1	II	4011458	4014775	-
SPBP8B7.22	1072.31	-0.178884	0.0954106	-1.87488	0.060809	0.473805	1199.07	1078.86	1015.33	995.992	erd2	HDEL receptor (predicted)	II	3680026	3680756	+
SPCC162.06c	639.898	-0.222993	0.118793	-1.87715	0.0604971	0.473805	742.948	636.021	586.914	593.709	vps60	vacuolar sorting protein Vps60 (predicted)	III	1577140	1577886	+
SPBC16C6.14	108.148	-0.490354	0.261682	-1.87385	0.0609509	0.473805	135.866	116.901	78.7675	101.057	spo2	sporulation specific protein Spo2	II	4322221	4322622	-
SPAC16E8.03	86.1115	-0.528202	0.28184	-1.87412	0.0609145	0.473805	101.36	102.041	71.0828	69.9624	gna1	glucosamine-phosphate N-acetyltransferase (predicted)	I	3505144	3505580	+
SPCC1827.05c	683.709	0.206221	0.110193	1.87145	0.061283	0.474099	644.823	625.123	708.907	755.983	SPCC1827.05c	nucleolar RNA-binding protein NIFK (predicted)	III	2384697	2385659	-
SPAC24B11.13	908.575	0.195702	0.104641	1.87023	0.0614521	0.474099	811.959	881.711	910.629	1030	hem3	hydroxymethylbilane synthase Hem3 (predicted)	I	231655	232665	+
SPAC1565.04c	1033.77	-0.177613	0.0948508	-1.87255	0.0611301	0.474099	1141.92	1053.1	960.579	979.473	ste4	adaptor protein Ste4	I	1295558	1296510	-
SPAC922.06	362.067	-0.277813	0.148499	-1.87081	0.0613713	0.474099	377.405	416.088	348.69	306.085	SPAC922.06	3-oxoacyl-[acyl-carrier-protein]reductase (predicted)	I	5485371	5486147	+
SPCC1919.11	311.792	-0.300741	0.160757	-1.87079	0.0613747	0.474099	365.543	322.964	257.435	301.227	mug137	BAR adaptor protein, involved in endocytosis (predicted)	III	2231761	2233381	+
SPBC3F6.04c	645.615	0.209033	0.11202	1.86604	0.0620361	0.477883	598.456	599.365	674.326	710.313	nop14	U3 snoRNP protein Nop14 (predicted)	II	4191623	4194157	-
SPAC1006.01	2234.37	-0.141541	0.0760143	-1.86203	0.062599	0.480772	2326.97	2360.81	2224.7	2025.02	psp3	vacuolar serine protease Psp3 (predicted)	I	5067840	5069195	+
SPAC1952.11c	1239.22	-0.164525	0.0883566	-1.86205	0.0625958	0.480772	1292.88	1326.53	1129.64	1207.82	ure2	nickel-dependent urease Ure2	I	4986738	4989245	-
SPAC1B2.06	16.9816	1.19834	0.64493	1.8581	0.0631555	0.482285	9.70469	10.8975	24.9751	22.3491	SPAC1B2.06	Schizosaccharomyces pombe specific protein	I	2812783	2813037	+
SPAC56F8.09	213.011	0.343661	0.184966	1.85797	0.0631732	0.482285	197.329	178.324	229.578	246.812	rrp8	rRNA methyltransferase Rrp8	I	1140621	1141577	+
SPCC4B3.10c	573.475	0.224957	0.121028	1.85872	0.063067	0.482285	546.698	511.194	586.914	649.096	ipk1	inositol 1,3,4,5,6-pentakisphosphate (IP5) kinase	III	1158148	1160126	+
SPBC1347.06c	1228.88	0.162668	0.0875152	1.85874	0.0630636	0.482285	1188.29	1131.36	1304.47	1291.39	cki1	serine/threonine protein kinase Cki1	II	4071711	4073134	-
SPAC3G6.04	248.132	0.32365	0.174482	1.85492	0.0636079	0.482721	233.991	207.053	290.095	261.387	rnp24	RNA-binding protein Rnp24	I	5385883	5386992	+
SPAC22E12.10c	1803.1	0.142967	0.0770248	1.85612	0.0634368	0.482721	1717.73	1709.92	1849.11	1935.63	etp1	mitochondrial [2Fe-2S] cluster assembly ferredoxin Etp1/ cytochrome oxidase cofactor Cox15, fusion protein	I	5037208	5039103	-
SPAC3G6.05	2226.13	-0.134727	0.0725792	-1.85628	0.0634136	0.482721	2273.05	2386.56	2136.33	2108.59	SPAC3G6.05	mitochondrial Mpv17/PMP22 family protein 1 (predicted)	I	5388586	5389395	+
SPCC1919.03c	1806.62	-0.142041	0.07657	-1.85505	0.0635885	0.482721	1924.76	1866.45	1736.73	1698.53	amk2	AMP-activated protein kinase beta subunit Amk2	III	2207736	2208999	-
SPAC664.14	759.896	0.209225	0.112886	1.85341	0.0638233	0.482923	749.418	660.788	769.424	859.954	amt2	plasma membrane ammonium transmembrane transporter Amt2	I	1731627	1733165	+
SPAC18G6.04c	1413.28	-0.15344	0.0827642	-1.85394	0.063748	0.482923	1510.7	1466.22	1329.44	1346.78	shm2	serine hydroxymethyltransferase Shm2 (predicted)	I	2217187	2218799	-
SPAC1D4.13	2019.1	0.135523	0.0732552	1.85001	0.0643122	0.485904	1924.76	1923.91	2109.43	2118.31	byr1	MAP kinase kinase Byr1	I	668153	669175	+
SPACUNK4.11c	207.746	0.350303	0.18958	1.84778	0.0646343	0.4862	194.094	171.389	246.869	218.632	mpp6	nuclear exosome-associated RNA binding protein Mpp6	I	2890158	2890779	+
SPBC2D10.15c	264.384	0.309147	0.167392	1.84685	0.0647692	0.4862	227.521	244.7	305.464	279.85	pth1	mitochondrial peptidyl-tRNA hydrolase Pth1 (predicted)	II	2995324	2996066	-
SPBP22H7.02c	426.437	0.246528	0.133408	1.84792	0.0646142	0.4862	397.892	382.405	469.723	455.727	mrd1	ribosome biogenesis RNA-binding protein Mrd1 (predicted)	II	1433412	1435913	-
SPBP8B7.12c	813.009	0.187344	0.101464	1.84641	0.0648324	0.4862	767.749	752.922	856.836	874.53	fta3	CENP-H ortholog Fta3	II	3654474	3655136	-
SPBC1683.10c	2245.75	0.132513	0.071775	1.84622	0.06486	0.4862	2128.56	2156.72	2389.92	2307.79	pcl1	vacuolar ferrous iron/manganese transmembrane transporter Pcl1	II	164430	165158	-
SPAC56F8.08	853.295	-0.186198	0.100877	-1.8458	0.0649217	0.4862	897.145	919.357	824.177	772.501	mud1	UBA domain protein Mud1	I	1139130	1140242	+
SPBC32H8.02c	200.133	-0.351688	0.190742	-1.84379	0.0652135	0.487671	218.895	229.839	164.259	187.538	nep2	NEDD8 protease Nep2	II	1452187	1453434	-
SPBC25H2.07	3353.19	0.122192	0.0663744	1.84094	0.0656298	0.490068	3272.64	3150.38	3582	3407.75	tif11	translation initiation factor eIF1A	II	3272287	3272703	-
SPAC1039.11c	525.601	-0.235205	0.127892	-1.83909	0.0659023	0.491385	566.107	570.635	521.594	444.067	gto1	alpha-glucosidase (predicted)	I	5471561	5474548	-
SPAPB24D3.06c	401.823	-0.261839	0.14248	-1.83773	0.0661029	0.492164	420.537	455.716	391.916	339.123	SPAPB24D3.06c	Alpha/Beta hydrolase fold, DUF1749 family protein	I	2956064	2957014	-
SPCC74.02c	380.97	-0.272976	0.148722	-1.83548	0.0664352	0.493918	408.675	425.004	310.267	379.935	ppn1	mRNA cleavage and polyadenylation specificity factor complex associated protein	III	1925746	1928207	-
SPAC18G6.11c	622.434	0.210182	0.114649	1.83327	0.0667632	0.494202	574.733	579.551	642.627	692.822	rrn3	RNA polymerase I general transcription inititation factor subunit Rrn3	I	2236996	2238795	-
SPBC2D10.03c	429.695	-0.246528	0.134423	-1.83397	0.0666579	0.494202	455.042	477.511	409.207	377.02	ess1	DUF866 family protein, human C1orf123 ortholog	II	2968322	2968795	-
SPAC29A4.14c	314.007	-0.286446	0.15621	-1.83372	0.0666952	0.494202	336.429	353.675	301.622	264.302	pex3	peroxin-3 peroxisome import protein Pex3 (predicted)	I	5119673	5120876	+
SPCC162.09c	792.652	-0.191539	0.104535	-1.83229	0.0669088	0.494565	830.29	859.916	711.789	768.615	hmg1	3-hydroxy-3-methylglutaryl-CoA reductase Hmg1	III	1561986	1565147	+
SPBC609.04	296.813	0.295081	0.161354	1.82878	0.0674319	0.496361	255.557	277.392	305.464	348.84	caf5	plasma membrane spermine family transmembrane transporter Caf5	II	3166680	3168275	+
SPBC9B6.05c	422.479	0.258024	0.141048	1.82933	0.0673499	0.496361	417.302	352.684	442.827	477.105	lsm3	Lsm2-8 complex subunit Lsm3	II	1822126	1822673	-
SPBC800.03	646.619	-0.210424	0.115111	-1.82801	0.0675479	0.496361	728.93	658.806	616.692	582.048	clr3	histone deacetylase (class II) Clr3	II	254822	256885	+
SPAPB1A10.14	199.62	-0.369557	0.202112	-1.82847	0.0674787	0.496361	196.25	253.616	187.313	161.302	pof15	F-box protein (predicted)	I	1890920	1891651	+
SPBC8D2.23	149.22	-0.404255	0.221216	-1.82742	0.0676371	0.496361	173.606	166.435	141.205	115.632	new15	mitochondrial protein, ribosomal subunit L35 (predicted)	II	1378510	1378770	+
SPCC1393.06c	435.567	0.258715	0.141703	1.82576	0.0678865	0.496766	383.874	409.153	429.379	519.859	ipi1	Rix1 complex Armadillo-type fold Ipi1	III	804627	806009	-
SPBC3B9.19	1389.55	0.152799	0.0837584	1.82429	0.0681086	0.496766	1286.41	1345.35	1453.36	1473.1	mge1	mitochondrial [2Fe-2S] cluster assembly and protein import chaperone Mge1 (predicted)	II	4022547	4023218	+
SPAC17A5.03	4117.69	0.113615	0.0622945	1.82383	0.0681778	0.496766	3906.68	4004.35	4361.99	4197.74	rpl301	60S ribosomal protein L3	I	1756109	1757275	+
SPAC323.07c	1567.83	-0.146973	0.0804799	-1.82621	0.0678188	0.496766	1675.68	1619.77	1463.92	1511.97	SPAC323.07c	MatE family transmembrane transporter (predicted)	I	3918201	3919864	-
SPBC18H10.05	305.019	-0.28147	0.154317	-1.82398	0.0681556	0.496766	337.508	331.88	274.726	275.963	SPBC18H10.05	WD repeat protein, human WDR44 family	II	1780014	1781774	+
SPBC119.11c	768.144	0.192458	0.105599	1.82254	0.0683731	0.496773	740.791	693.48	837.625	800.681	pac1	double-strand-specific ribonuclease Pac1	II	737704	738795	-
SPBC409.07c	318.984	-0.283363	0.155474	-1.82258	0.0683671	0.496773	340.743	359.619	307.385	268.189	wis1	MAP kinase kinase Wis1	II	1143967	1145784	-
SPBC359.02	4.16356	2.78809	1.53333	1.81832	0.0690147	0.500015	2.1566	0	6.72405	7.7736	alr2	alanine racemase Alr2 (predicted)	II	107759	108871	+
SPBC1711.04	685.01	0.212326	0.116731	1.81893	0.0689217	0.500015	582.281	686.546	750.212	721.001	mtd1	methylenetetrahydrofolate reductase Mtd1 (predicted)	II	2139862	2140991	+
SPAC22A12.08c	2016.53	0.133205	0.073315	1.81689	0.0692337	0.500892	1929.08	1917.97	2102.71	2116.36	crd1	cardiolipin synthase/ hydrolase fusion protein Crd1 (predicted)	I	1170196	1172126	-
SPCC1183.10	93.0317	-0.493461	0.272077	-1.81368	0.0697269	0.503747	104.595	112.938	75.8857	78.7077	wtf10	wtf element Wtf10	III	615605	616689	+
SPBC17D1.17	1610.2	0.146769	0.0809902	1.81218	0.0699583	0.504379	1558.14	1498.91	1738.65	1645.09	tam11	Schizosaccharomyces specific protein Tam11	II	3346629	3346817	-
SPBC1709.03	1981.35	-0.137582	0.0759353	-1.81184	0.0700116	0.504379	2067.1	2084.4	1948.05	1825.82	SPBC1709.03	DUF3844 family transmembrane protein, conserved in fungi	II	1102314	1103683	+
SPBC887.15c	2070.86	0.140284	0.0775137	1.8098	0.0703265	0.505242	1875.16	2064.59	2166.11	2177.58	sur2	sphingosine hydroxylase/sphingolipid delta-4 desaturase activity Sur2	II	3571380	3572261	-
SPBC16A3.18	1167.45	-0.161536	0.0892719	-1.80949	0.0703757	0.505242	1227.1	1238.36	1131.56	1072.76	cip1	RNA-binding protein Cip1	II	4262473	4263945	-
SPAC25B8.03	1027.61	-0.184626	0.102051	-1.80915	0.0704276	0.505242	1004.97	1180.9	955.776	968.785	psd2	phosphatidylserine decarboxylase Psd2	I	4158828	4160378	+
SPCC1393.12	3424.17	0.283216	0.156912	1.80494	0.0710839	0.509235	3102.27	3076.08	4172.75	3345.56	SPCC1393.12	Schizosaccharomyces specific protein	III	823679	824005	+
SPBC8D2.15	2231.51	-0.13279	0.0736281	-1.80353	0.0713058	0.510111	2264.43	2403.4	2162.26	2095.96	lip5	mitochondrial lipoic acid synthetase Lip5 (predicted)	II	1386298	1387451	+
SPAC16E8.06c	395.184	0.251028	0.139327	1.80172	0.0715902	0.51143	375.248	346.74	439.945	418.803	nop12	RNA-binding protein Nop12 (predicted)	I	3508646	3510007	-
SPBC19F8.08	9246.44	0.0997628	0.055468	1.79856	0.0720877	0.512123	8704.03	9148.99	9653.82	9478.93	rps401	40S ribosomal protein S4 (predicted)	II	3245143	3245931	+
SPBC3B9.10	1319.68	-0.155867	0.0865865	-1.80013	0.0718397	0.512123	1389.93	1391.91	1293.9	1202.96	vti1	SNARE Vti1 (predicted)	II	4004957	4006028	+
SPAC13G7.11	634.654	-0.203815	0.113279	-1.79923	0.071982	0.512123	677.172	681.592	569.623	610.228	mba1	mitochondrial membrane-associated ribosome receptor Mba1 (predicted)	I	2315187	2316133	+
SPAC1782.02c	443.962	-0.247557	0.137639	-1.79859	0.072083	0.512123	487.391	476.52	370.783	441.152	SPAC1782.02c	conserved fungal protein	I	4760301	4760886	-
SPAC2C4.11c	418.92	0.252666	0.140778	1.79479	0.0726876	0.515578	404.362	360.61	484.132	426.576	pno1	KH domain RNA-binding protein Pno1 (predicted)	I	4278729	4279505	-
SPBC21H7.07c	1228.82	-0.155456	0.0866422	-1.79423	0.0727757	0.515578	1282.1	1307.71	1157.5	1167.98	his5	imidazoleglycerol-phosphate dehydratase His5	II	2266666	2267316	-
SPAC12G12.04	13988.9	-0.0918336	0.0512409	-1.79219	0.0731021	0.517175	14440.6	14427.4	13731.5	13356	mcp60	mitochondrial heat shock protein Hsp60/Mcp60	I	340107	341855	-
SPAC4G8.10	498.75	-0.223062	0.12452	-1.79137	0.0732333	0.517387	530.523	543.887	469.723	450.869	gos1	SNARE Gos1 (predicted)	I	781487	782035	+
SPAC1805.16c	3131.14	0.116205	0.0649432	1.78934	0.0735609	0.518985	2981.5	3028.53	3252.52	3262	SPAC1805.16c	purine nucleoside phosphorylase (predicted)	I	2800953	2801900	-
SPBC4B4.01c	1753.82	-0.14329	0.0802052	-1.78654	0.0740118	0.521447	1873.01	1808.99	1731.92	1601.36	ptk1	fumble family pantothenate kinase (predicted)	II	3411376	3412712	-
SPAC323.03c	360.097	0.257891	0.144565	1.78391	0.0744378	0.52229	332.116	323.954	406.325	377.991	SPAC323.03c	Schizosaccharomyces specific protein	I	3910740	3912604	-
SPBC18H10.04c	3605.56	0.114873	0.0643851	1.78415	0.0743994	0.52229	3480.75	3443.63	3840.39	3657.48	sce3	translation initiation factor (predicted)	II	1775489	1776897	-
SPAC31G5.05c	2182.81	-0.139379	0.0780813	-1.78505	0.0742538	0.52229	2179.24	2396.47	2136.33	2019.19	SPAC31G5.05c	ribulose phosphate 3-epimerase (predicted)	I	2995039	2995770	-
SPAC3A11.10c	3964.8	-0.120573	0.0676372	-1.78264	0.0746447	0.523024	4140.67	4120.26	3982.56	3615.7	dpe1	dipeptidyl peptidase, unknown specificity, implicated in glutathione metabolism (predicted)	I	3448364	3449593	+
SPCC74.06	708.13	-0.192475	0.108176	-1.77928	0.0751941	0.526153	766.671	744.005	642.627	679.218	mak3	histidine kinase Mak3	III	1940449	1947483	+
SPAC22A12.15c	11717	-0.0960454	0.0540088	-1.77833	0.07535	0.526523	12400.4	11813.9	11226.3	11427.2	bip1	ER heat shock protein BiP	I	1183312	1185303	-
SPBC19F8.07	1157.62	0.172738	0.0972347	1.7765	0.0756504	0.527902	1048.11	1128.39	1306.39	1147.58	mcs6	transcription factor TFIIH associated cyclin-dependent protein kinase Mcs6	II	3243429	3244436	+
SPCC320.11c	341.016	0.276784	0.156024	1.77399	0.0760654	0.528151	341.821	275.411	370.783	376.048	nip7	RNA-binding ribosome biogenesis protein Nip7 (predicted)	III	144380	145237	+
SPCC1281.07c	643.807	0.201211	0.113436	1.77378	0.0760992	0.528151	586.595	611.253	713.71	663.671	gst4	glutathione S-transferase (predicted)	III	1397625	1398638	-
SPAC1B3.13	796.808	0.187506	0.105602	1.77558	0.0758014	0.528151	747.261	743.015	891.417	805.539	nan1	U3 snoRNP-associated protein Nan1 (predicted)	I	4951432	4954023	+
SPAC31G5.03	2909.88	0.134191	0.0756325	1.77425	0.0760211	0.528151	2653.69	2894.79	2901.91	3189.12	rps1101	40S ribosomal protein S11 (predicted)	I	2992657	2993115	+
SPAPB24D3.09c	262.576	0.302341	0.170545	1.7728	0.0762624	0.528567	241.539	228.849	268.002	311.916	pdr1	ABC transmembrane transporter Pdr1	I	2963162	2967352	-
SPAC630.03	2412.96	-0.130659	0.0737288	-1.77215	0.0763689	0.528589	2440.19	2603.52	2239.11	2369	arp3	Arp2/3 protein complex, actin-like protein subunit Arp3	I	350477	352055	+
SPCC18B5.06	709.958	0.189253	0.106872	1.77084	0.0765866	0.528665	663.154	663.76	756.936	755.983	dom34	Dom34-Hbs1 translation release factor complex subunit, peloto ortholog Dom34	III	729133	730522	+
SPBC12C2.12c	1840.57	-0.143654	0.081108	-1.77115	0.0765359	0.528665	2001.32	1863.48	1818.38	1679.1	glo1	glyoxalase I	II	2446698	2447606	+
SPBC947.06c	431.811	-0.250716	0.141656	-1.76989	0.0767448	0.529043	425.928	512.185	410.167	378.963	SPBC947.06c	spermidine family transmembrane transporter (predicted)	II	662940	664436	+
SPBC8E4.05c	125.704	0.429861	0.243242	1.76722	0.0771916	0.531407	99.2035	114.92	159.456	129.236	SPBC8E4.05c	fumarate lyase superfamily, unknown specificity, bacterial 3-carboxy-cis,cis-muconate cycloisomerase related	II	4430190	4431533	+
SPBC1677.02	672.506	-0.196258	0.111267	-1.76384	0.0777584	0.534589	690.111	745.987	633.982	619.945	dpm3	dolichol-phosphate mannosyltransferase subunit 3	II	3935144	3935481	+
SPBC119.15	454.455	0.228416	0.129627	1.76211	0.078051	0.535312	428.085	409.153	491.816	488.765	npa3	RNA polymerase II binding AAA family ATPase Npa3 (predicted)	II	747852	749085	+
SPAC6G10.05c	834.592	0.181793	0.103297	1.75991	0.0784237	0.535312	820.586	744.005	886.614	887.162	trs120	TRAPP II complex subunit Trs120	I	3222505	3226243	-
SPAC1556.08c	2012.73	-0.131193	0.0745979	-1.75867	0.078633	0.535312	2069.26	2138.89	1955.74	1887.04	cbs2	AMP-activated protein kinase gamma subunit Cbs2	I	3807447	3808670	-
SPAC3G9.11c	2213.97	-0.132544	0.0752913	-1.76041	0.0783375	0.535312	2234.24	2396.47	2164.18	2060.98	pdc201	pyruvate decarboxylase (predicted)	I	3160230	3161942	+
SPBC4C3.10c	1616.83	-0.13927	0.0790532	-1.76172	0.0781163	0.535312	1674.6	1714.88	1553.26	1524.6	pre3	20S proteasome complex subunit beta 1 Pre3	II	3117669	3118627	+
SPAC21E11.04	593.85	-0.203398	0.115484	-1.76126	0.078194	0.535312	623.257	647.909	554.254	549.982	aca1	L-azetidine-2-carboxylic acid acetyltransferase Aca1	I	4254860	4255489	+
SPAC22H12.05c	706.489	-0.203485	0.11573	-1.75827	0.0787008	0.535312	819.507	693.48	654.154	658.813	fsc1	fasciclin domain protein Fsc1	I	899567	901753	-
SPBC725.13c	414.881	-0.25012	0.142219	-1.7587	0.0786289	0.535312	409.754	491.38	379.429	378.963	psf2	GINS complex subunit Psf2	II	1228476	1229027	-
SPAC2G11.06	963.196	-0.171755	0.0977529	-1.75703	0.0789121	0.536037	999.583	1041.21	943.289	868.7	vps4	AAA family ATPase Vps4	I	818117	819650	+
SPAC9G1.14	19.7349	1.04104	0.593663	1.75358	0.0795023	0.536191	12.9396	12.8789	27.8568	25.2642	SPAC9G1.14	dubious	I	1968801	1969046	-
SPAC22G7.05	399.219	0.252078	0.143711	1.75407	0.079419	0.536191	333.194	395.284	445.709	422.689	kri1	ribosome biogenesis protein Kri1 (predicted)	I	736797	738720	+
SPBC1718.07c	845.371	0.178084	0.101471	1.75503	0.0792547	0.536191	769.906	816.325	877.969	917.285	zfs1	zf-CCCH tandem zinc finger protein, human Tristetraprolin homolog Zfs1, involved in mRNA catabolism	II	3483454	3484668	-
SPCC736.13	1980.38	-0.135928	0.0775572	-1.75261	0.0796686	0.536191	2129.64	2018.03	1949.98	1823.88	SPCC736.13	short chain dehydrogenase (predicted)	III	340769	341788	-
SPBC1198.13c	1289.99	-0.149817	0.0854577	-1.75311	0.0795832	0.536191	1371.6	1342.38	1239.15	1206.85	tfg2	transcription factor TFIIF complex beta subunit Tfg2 (predicted)	II	195990	197075	-
SPBP23A10.13	455.957	-0.226625	0.129273	-1.75307	0.0795901	0.536191	482	501.287	417.852	422.689	orc4	origin recognition complex subunit Orc4	II	2025543	2028461	+
SPBC21D10.06c	459.16	-1.04792	0.597878	-1.75272	0.0796493	0.536191	848.621	389.34	242.066	356.614	map4	cell surface adhesion protein for conjugation Map4	II	2435636	2438482	+
SPCC16C4.06c	138.189	0.407828	0.232815	1.75172	0.0798211	0.536511	134.787	103.031	158.496	156.444	pus3	tRNA pseudouridine synthase Pus3 (predicted)	III	669467	670760	-
SPBC21B10.08c	3845.2	-0.111105	0.0635114	-1.74937	0.0802278	0.538537	3928.24	4057.85	3769.31	3625.41	SPBC21B10.08c	antibiotic biosynthesis monooxygenase-like domain (predicted)	II	1655946	1656777	+
SPAC17C9.06	1104.5	-0.158926	0.0908888	-1.74858	0.0803638	0.538743	1136.53	1193.78	1047.99	1039.72	sam50	mitochondrial sorting and assembly machinery complex subunit Sam50 (predicted)	I	4488784	4490292	-
SPAC29B12.01	829.787	0.175231	0.100469	1.74414	0.0811346	0.543198	774.219	784.624	875.087	885.219	ino80	SNF2 family ATP-dependent 3' to 5' DNA helicase Ino80	I	5403241	5408055	+
SPCC576.08c	10035.7	0.098183	0.0563306	1.74298	0.0813372	0.543843	9476.09	9911.82	10129.3	10625.5	rps2	40S ribosomal protein S2 (predicted)	III	2095227	2095988	-
SPAC16.05c	152.787	0.381222	0.219162	1.73945	0.0819557	0.547263	133.709	131.761	189.234	156.444	sfp1	DNA-binding transcription factor Sfp1 (predicted)	I	4432304	4433632	-
SPAC922.09	28.909	0.851526	0.490534	1.73592	0.0825785	0.548233	19.4094	21.7951	33.6203	40.8114	SPAC922.09	dubious	I	5482662	5482877	+
SPCC1682.13	292.91	0.27946	0.160927	1.73657	0.0824638	0.548233	272.81	256.588	340.045	302.199	laf2	Clr6 associated factor 2, Laf2	III	399080	399898	+
SPAC23G3.08c	750.087	0.185539	0.106898	1.73566	0.0826238	0.548233	722.46	681.592	773.266	823.03	ubp7	ubiquitin C-terminal hydrolase Ubp7	I	881023	883650	-
SPBC1271.08c	811.31	-0.20891	0.120368	-1.73559	0.0826368	0.548233	893.91	846.046	660.878	844.407	SPBC1271.08c	Schizosaccharomyces pombe specific protein	II	356910	357332	+
SPCC663.17	159.633	-0.364411	0.209679	-1.73795	0.0822205	0.548233	180.076	179.314	145.047	134.095	wtf15	wtf element Wtf15	III	1632825	1633942	+
SPBC16G5.17	376.357	0.245182	0.141451	1.73334	0.0830355	0.549452	346.134	342.777	394.798	421.718	SPBC16G5.17	DNA-binding transcription factor, zf-fungal binuclear cluster type (predicted)	II	4247818	4249500	+
SPAPB1A10.05	685.44	0.189994	0.109606	1.73342	0.0830203	0.549452	643.745	637.011	708.907	752.096	SPAPB1A10.05	Schizosaccharomyces specific protein	I	1867135	1868019	+
SPBC409.13	733.777	-0.195479	0.112936	-1.73089	0.0834718	0.551626	761.279	805.428	733.882	634.52	rib4	6,7-dimethyl-8-ribityllumazine synthase	II	1165481	1166247	+
SPCC16A11.10c	2619.22	-0.129999	0.0751525	-1.7298	0.0836661	0.552196	2583.6	2889.83	2503.27	2500.18	oca8	cytochrome b5 (predicted)	III	887406	888387	-
SPAC56F8.02	469.794	0.221067	0.127901	1.72842	0.0839125	0.553109	423.772	443.827	500.462	511.114	SPAC56F8.02	AMP binding enzyme, human DIP2 family (predicted)	I	1124167	1128720	+
SPBC16H5.09c	358.67	0.247572	0.14352	1.725	0.0845267	0.553591	331.038	324.945	388.074	390.623	omh2	alpha-1,2-mannosyltransferase Omh2 (predicted)	II	2282566	2283827	+
SPAC10F6.16	771.068	0.183288	0.106173	1.72631	0.0842909	0.553591	689.033	754.903	829.94	810.398	igo1	endosulfine (ENSA) serine/threonine protein kinase Igo1	I	1238896	1239424	+
SPCC1322.10	7847	0.106233	0.0615819	1.72507	0.0845148	0.553591	7441.34	7674.85	8502.08	7769.71	SPCC1322.10	conserved fungal cell surface protein, Kre9/Knh1 family	III	1309780	1310568	+
SPCC794.03	3721.49	-0.109808	0.0635846	-1.72696	0.0841754	0.553591	3849.53	3876.56	3659.81	3500.06	SPCC794.03	amino acid transmembrane transporter (predicted)	III	245964	247628	+
SPBC16A3.14	576.653	-0.205749	0.119258	-1.72524	0.0844848	0.553591	623.257	612.244	561.939	509.171	SPBC16A3.14	superoxide dismutase, mitochondrial ribosomal protein subunit (predicted)	II	4271131	4271937	-
SPCC16C4.18c	1483.5	-0.14562	0.0847649	-1.71792	0.0858105	0.557006	1547.36	1569.25	1472.57	1344.83	taf6	SAGA complex/transcription factor TFIID complex histone H4-like subunit Taf6	III	700165	701681	-
SPBC1718.06	1291.44	-0.148276	0.086282	-1.7185	0.0857055	0.557006	1394.24	1321.58	1234.34	1215.6	msp1	mitochondrial dynamin family fusion GTPase Msp1	II	3479898	3482609	+
SPAC12B10.16c	1094.42	-0.159652	0.0928317	-1.7198	0.0854682	0.557006	1125.74	1183.87	1067.2	1000.85	mug157	alpha-mannosidase GH125 family Mug157 (predicted)	I	4601527	4603221	-
SPAC824.04	976.817	-0.166786	0.0970804	-1.71801	0.085794	0.557006	1008.21	1058.05	954.815	886.19	swd22	mRNA cleavage and polyadenylation specificity factor complex, WD repeat protein Swd22	I	1690362	1691387	+
SPAC694.04c	795.077	-0.177803	0.103381	-1.71988	0.085455	0.557006	825.977	861.897	763.66	728.775	SPAC694.04c	nuclear/mitochondrial metal-dependent protein hydrolase, human MYG1 ortholog	I	4206795	4208112	-
SPAC57A10.08c	366.103	-0.251902	0.146625	-1.718	0.0857968	0.557006	409.754	386.368	356.375	311.916	SPAC57A10.08c	lipid particle hydrolase (predicted)	I	1378561	1379746	-
SPCC965.14c	269.29	-0.289726	0.168323	-1.72125	0.0852054	0.557006	279.279	313.057	256.475	228.349	SPCC965.14c	cytosine deaminase (predicted)	III	2314802	2315290	+
SPAC23H4.04	510.668	0.246084	0.14337	1.71642	0.0860845	0.55737	506.801	427.976	489.895	618.001	slm3	mitochondrial tRNA-specific 2-thiouridylase Slm3 (predicted)	I	1601508	1602886	-
SPCC132.01c	612.044	0.200956	0.117072	1.71652	0.0860666	0.55737	554.246	584.505	624.376	685.048	mtr1	microtubule regulator Mtr1	III	1325197	1328307	-
SPCC74.05	4141.89	0.111424	0.0649966	1.71431	0.0864719	0.558464	3843.06	4120.26	4378.32	4225.92	rpl2702	60S ribosomal protein L27 (predicted)	III	1939265	1939744	+
SPAC4G9.19	276.369	-0.28555	0.166526	-1.71475	0.086391	0.558464	291.141	316.029	267.041	231.265	SPAC4G9.19	DNAJ domain protein DNAJB family (predicted)	I	2287377	2288189	+
SPBC56F2.11	1841.61	0.131765	0.0768915	1.71364	0.0865943	0.55855	1743.61	1771.35	1876.97	1974.49	met6	homoserine O-acetyltransferase Met6	II	4089279	4090826	-
SPBP23A10.04	282.894	-0.283155	0.165373	-1.71222	0.0868561	0.559533	331.038	290.271	241.105	269.161	apc2	anaphase-promoting complex cullin family subunit Apc2	II	2001135	2003269	+
SPBC947.07	122.407	0.420514	0.246525	1.70576	0.088052	0.562905	116.456	93.1245	150.811	129.236	rrp1402	ribosome biogenesis protein Rrp14 (predicted)	II	660384	661085	-
SPAC343.11c	441.436	0.226144	0.132627	1.70512	0.0881728	0.562905	422.693	391.321	465.881	485.85	msc1	Swr1 complex subunit Msc1	I	1658475	1663241	-
SPAC7D4.15c	549.621	0.210129	0.122992	1.70848	0.087548	0.562905	525.132	494.352	559.057	619.945	ost4	oligosaccharyltransferase subunit Ost4 (predicted)	I	2623940	2624038	-
SPAC16C9.03	652.364	0.189474	0.111027	1.70655	0.0879054	0.562905	618.944	600.356	701.223	688.935	nmd3	ribosome export adaptor Nmd3 (predicted)	I	795084	796580	+
SPCC4B3.13	747.425	0.181739	0.106543	1.70578	0.0880491	0.562905	694.425	706.359	823.216	765.7	SPCC4B3.13	MatE family transmembrane transporter (predicted)	III	1152243	1153862	-
SPBC9B6.11c	1429.93	0.140118	0.0821338	1.70597	0.0880136	0.562905	1347.87	1373.09	1503.31	1495.45	SPBC9B6.11c	CCR4/nocturin family endoribonuclease (predicted)	II	1833167	1834804	-
SPAC1952.09c	534.562	-0.214243	0.125682	-1.70465	0.08826	0.562905	533.758	614.225	494.698	495.567	SPAC1952.09c	acetyl-CoA hydrolase (predicted)	I	4981334	4982899	-
SPBC354.15	429.443	-0.232268	0.136229	-1.70498	0.0881991	0.562905	444.259	483.455	414.01	376.048	fap1	L-pipecolate oxidase	II	586543	587781	+
SPCC4G3.05c	265.889	0.282945	0.166299	1.70142	0.0888634	0.563242	249.087	230.83	282.41	301.227	mus81	Holliday junction resolvase subunit Mus81	III	462720	464714	+
SPAC31G5.08	389.023	0.241529	0.141936	1.70168	0.0888158	0.563242	335.351	377.451	432.261	411.029	hem4	uroporphyrinogen-III synthase Ups	I	2999088	2999843	+
SPBC17G9.09	2125.5	0.129666	0.0762085	1.70147	0.0888553	0.563242	1987.31	2072.52	2304.43	2137.74	tif213	translation initiation factor eIF2 gamma subunit	II	2187712	2189052	+
SPAC57A7.04c	5284.21	0.0999361	0.0586844	1.70294	0.0885789	0.563242	5180.15	5022.78	5424.39	5509.54	pabp	major poly(A) binding protein Pabp/Pab1	I	1542865	1544826	+
SPAC167.05	1116.99	-0.152765	0.0897087	-1.7029	0.0885865	0.563242	1187.21	1165.05	1064.32	1051.38	dbs2	Usp (universal stress protein) family protein	I	1551408	1553213	-
SPCC4B3.02c	267.697	0.294217	0.173277	1.69795	0.0895167	0.56598	266.34	214.979	282.41	307.057	got1	Golgi transport protein Got1 (predicted)	III	1176759	1177404	+
SPBC19G7.01c	728.275	-0.180887	0.106515	-1.69823	0.0894648	0.56598	785.002	762.828	668.563	696.709	msh2	MutS protein homolog 2	II	2344457	2347542	-
SPCC1682.16	2579.19	-0.119634	0.0705689	-1.69527	0.0900234	0.568481	2611.64	2760.05	2509.03	2436.05	rpt4	19S proteasome base subcomplex ATPase subunit Rpt4	III	405612	407251	+
SPAC26F1.02	304.153	0.275791	0.162894	1.69308	0.090441	0.568658	274.966	275.411	365.981	300.255	pnn1	splicing factor, pinin ortholog Pnn1	I	5181982	5182731	-
SPAC4G9.03	2445.88	-0.120992	0.0714504	-1.69338	0.0903838	0.568658	2477.93	2618.38	2375.51	2311.67	adk1	adenylate kinase Adk1	I	2255935	2256597	+
SPCC1183.02	1526.9	-0.140998	0.0832933	-1.69279	0.0904961	0.568658	1625	1578.16	1508.11	1396.33	SPCC1183.02	glutathione S-transferase, translational elongation factor eEF1 (predicted)	III	595060	596002	+
SPCC23B6.03c	386.247	-0.24119	0.14236	-1.69423	0.0902215	0.568658	396.814	439.865	341.006	367.303	tel1	ATM checkpoint kinase	III	1268997	1277435	-
SPCC11E10.05c	356.194	0.253118	0.14973	1.6905	0.0909332	0.570703	303.002	346.74	368.862	406.171	ynd1	nucleoside diphosphatase Ynd1	III	1460509	1462227	-
SPAC3A12.06c	882.127	0.176419	0.104445	1.68911	0.0911986	0.571668	774.219	881.711	913.511	959.068	SPAC3A12.06c	sodium/calcium exchanger (predicted)	I	1430424	1432655	-
SPAC23H3.04	272.641	0.274981	0.162975	1.68726	0.0915531	0.573188	244.774	248.662	292.016	305.114	SPAC23H3.04	conserved fungal multispanning membrane protein	I	2499035	2500236	+
SPBC3E7.17	41.7874	0.696616	0.413014	1.68667	0.0916677	0.573203	28.0358	35.6647	45.1472	58.302	SPBC3E7.17	dubious	II	2661796	2661978	+
SPAC2F7.05c	1846.95	0.14284	0.0847445	1.68554	0.0918847	0.573859	1637.94	1872.4	1982.63	1894.81	tif5	translation initiation factor eIF5, Tif5(predicted)	I	540125	541312	-
SPAC10F6.10	303.101	0.291015	0.173132	1.68089	0.0927846	0.57668	315.942	229.839	332.36	334.265	rio1	protein kinase, RIO family Rio1 (predicted)	I	1225599	1227279	+
SPCC4E9.02	359.3	0.259878	0.154512	1.68193	0.0925819	0.57668	333.194	320.982	434.182	348.84	cig1	cyclin Cig1	III	1227545	1228792	+
SPAC20G8.05c	594.525	0.200234	0.119081	1.68149	0.0926675	0.57668	577.968	529.026	660.878	610.228	cdc15	F-BAR domain protein Cdc15	I	1399798	1402886	-
SPAC1A6.09c	728.906	0.178277	0.106199	1.67871	0.0932092	0.57668	678.25	689.518	760.779	787.077	lag1	sphingosine N-acyltransferase Lag1	I	1087819	1088991	-
SPBC800.05c	1233.5	0.156854	0.0934781	1.67798	0.0933511	0.57668	1088	1244.3	1302.55	1299.16	atb2	tubulin alpha 2	II	260725	262074	-
SPBP8B7.21	1101.5	0.153848	0.0916792	1.67811	0.093325	0.57668	1053.5	1032.3	1194.96	1125.23	ubp3	ubiquitin C-terminal hydrolase Ubp3	II	3677713	3679289	+
SPBC1921.01c	4282.13	-0.106049	0.0631982	-1.67804	0.0933401	0.57668	4300.26	4577.96	4146.82	4103.49	rpl35b	60S ribosomal protein L35a (predicted)	II	2405504	2405961	-
SPAC4A8.13c	1950.27	-0.13045	0.0776745	-1.67944	0.0930668	0.57668	1998.09	2078.46	1930.76	1793.76	pts1	20S proteasome complex subunit beta 5	I	2575106	2575924	-
SPCC1450.06c	476.315	-0.227702	0.13554	-1.67996	0.0929644	0.57668	489.548	537.943	475.487	402.284	grx3	CIA machinery monothiol glutaredoxin Grx3	III	1735427	1735927	-
SPBC2A9.04c	777.096	-0.178457	0.10645	-1.67644	0.0936527	0.577845	866.952	783.633	733.882	723.916	san1	sir antagonist, ubiquitin-protein ligase E3	II	2952816	2955041	-
SPAC13G7.08c	624.703	0.192414	0.11487	1.67506	0.0939225	0.578811	587.673	578.561	638.785	693.794	crb3	Rix1 complex WD repeat subunit Crb3	I	2310386	2311891	-
SPAC4F8.14c	1858.15	-0.133439	0.0797437	-1.67335	0.0942591	0.580187	1865.46	2021.99	1728.08	1817.08	hcs1	3-hydroxy-3-methylglutaryl-CoA synthase	I	2643624	2645143	+
SPBC2G5.01	1789.6	-0.129632	0.0775054	-1.67255	0.0944163	0.580456	1825.56	1914.01	1730	1688.81	SPBC2G5.01	ER protein involved in ER-nucleus signaling (predicted)	II	2576621	2577745	+
SPAC222.05c	468.991	0.214278	0.128192	1.67154	0.0946144	0.580975	434.555	433.921	517.752	489.737	mss1	mitochondrial tRNA wobble uridine modification GTPase Mss1 (predicted)	I	951054	952603	-
SPBP8B7.32	209.567	0.307485	0.18428	1.66857	0.0952027	0.583188	184.389	190.212	237.263	226.406	SPBP8B7.32	dubious	II	3630377	3630601	+
SPCC24B10.20	105.964	-0.42837	0.256728	-1.66858	0.0952013	0.583188	128.318	114.92	94.1367	86.4813	SPCC24B10.20	short chain dehydrogenase, unknown specificity (predicted)	III	937803	938567	+
SPAC13G6.15c	210.379	0.313747	0.188225	1.66687	0.0955395	0.584551	177.919	197.147	248.79	217.661	SPAC13G6.15c	calcipressin (predicted)	I	202487	202978	-
SPAC17H9.18c	23.9369	-1.00522	0.603707	-1.66508	0.0958969	0.586037	17.2528	46.5623	11.5269	20.4057	SPAC17H9.18c	Schizosaccharomyces pombe specific protein	I	2033638	2033955	-
SPBP35G2.07	1707.05	0.138443	0.0831911	1.66415	0.096082	0.586467	1565.69	1684.17	1714.63	1863.72	ilv1	acetolactate synthase catalytic subunit	II	977109	979118	+
SPAC57A7.13	503.176	0.207025	0.124567	1.66195	0.0965219	0.587576	477.686	456.706	527.358	550.954	SPAC57A7.13	RNA-binding protein, involved in splicing (predicted)	I	1512764	1514628	-
SPAC9.08c	779.385	0.178352	0.107348	1.66144	0.0966251	0.587576	764.514	698.434	857.797	796.794	SPAC9.08c	steroid reductase (predicted)	I	1477214	1478062	-
SPCC18B5.05c	2265.27	0.119986	0.0722071	1.66169	0.0965753	0.587576	2225.61	2117.1	2367.83	2350.54	SPCC18B5.05c	phosphomethylpyrimidine kinase (predicted)	III	727030	728013	-
SPCC553.08c	845.964	-0.165636	0.0997236	-1.66095	0.0967231	0.587576	886.362	902.515	803.044	791.935	ria1	GTPase Ria1 (predicted)	III	289912	293014	+
SPAC56E4.07	294.343	0.294214	0.177729	1.65541	0.0978417	0.588777	224.286	304.141	348.69	300.255	SPAC56E4.07	N-acetyltransferase (predicted)	I	1259365	1260072	+
SPCC306.02c	718.177	0.182143	0.11002	1.65555	0.0978138	0.588777	663.154	682.583	802.083	724.888	yip3	Rab GTPase binding involved in ER to Golgi vesicle transport Yip3 (predicted)	III	408244	408823	-
SPBC12D12.04c	885.095	0.163577	0.098743	1.6566	0.0976008	0.588777	822.742	847.037	916.392	954.209	pck2	protein kinase C (PKC)-like Pck2	II	2309787	2312837	-
SPAC1B3.14	2804.95	-0.120047	0.0725151	-1.65547	0.0978285	0.588777	2808.97	3033.48	2606.05	2771.29	vma3	V-type ATPase V0 subunit c (proteolipid subunit)	I	4954634	4955443	+
SPAC26A3.05	2394.37	-0.124933	0.0753249	-1.65859	0.0971987	0.588777	2497.34	2498.51	2175.71	2405.93	chc1	clathrin heavy chain Chc1 (predicted)	I	3339136	3344232	+
SPAC19G12.11	861.034	-0.171953	0.103807	-1.65646	0.0976281	0.588777	898.223	926.292	856.836	762.784	coq9	ubiquinone biosynthesis protein Coq9 (predicted)	I	4067434	4068186	+
SPBC1271.01c	228.245	-0.297534	0.179345	-1.659	0.0971154	0.588777	258.792	244.7	217.091	192.397	pof13	F-box protein Pof13	II	372359	373549	+
SPAC458.04c	133.296	-0.386698	0.233372	-1.657	0.0975196	0.588777	158.51	143.65	104.703	126.321	dli1	meiotic dynein intermediate light chain Dli1/Dil1	I	4737605	4738854	-
SPBC21C3.20c	637.912	-0.18867	0.11407	-1.65398	0.0981312	0.589825	709.521	649.89	590.756	601.482	git1	C2 domain protein Git1	II	3831197	3834493	-
SPCC794.16	16.2038	1.11951	0.677705	1.65191	0.0985521	0.590274	6.46979	13.8696	19.2116	25.2642	NA	NA	NA	NA	NA	NA
SPBC1289.15	156.259	0.354521	0.214587	1.65211	0.0985123	0.590274	131.552	142.659	164.259	186.566	pfl5	cell surface glycoprotein, flocculin Pfl5	II	4421413	4425264	+
SPBP8B7.26	775.198	0.18747	0.113453	1.6524	0.0984535	0.590274	737.557	712.303	754.054	896.879	SPBP8B7.26	Schizosaccharomyces specific protein	II	3687124	3687966	+
SPAC3F10.08c	190.163	0.324328	0.196535	1.65023	0.098895	0.590402	155.275	182.286	217.091	206	faf1	rRNA processing protein Faf1 (predicted)	I	2831810	2832589	-
SPAC823.08c	333.593	0.245056	0.148471	1.65053	0.0988336	0.590402	310.55	300.178	359.257	364.387	rrp3	ATP-dependent RNA helicase Rrp3 (predicted)	I	2592647	2594044	-
SPAC688.09	528.849	0.201989	0.122481	1.64915	0.099117	0.590402	501.409	482.464	547.53	583.992	rim2	mitochondrial carrier, pyrimidine nucleotide Rim2 (predicted)	I	3127647	3128780	+
SPAP8A3.04c	27003.2	0.191206	0.116134	1.64642	0.0996767	0.590402	24492.5	25940.1	30962.3	26617.8	hsp9	heat shock protein Hsp9	I	5320399	5320605	-
SPBC16G5.01	1461.57	-0.135656	0.0823694	-1.64692	0.0995742	0.590402	1499.91	1560.33	1411.09	1374.96	rpn12	19S proteasome regulatory subunit Rpn12	II	4215006	4215869	+
SPBC660.13c	1418.71	-0.138128	0.0839325	-1.6457	0.099825	0.590402	1476.19	1496.93	1391.88	1309.85	ssb1	DNA replication factor A subunit Ssb1	II	219362	221260	-
SPCPJ732.02c	1296.77	-0.140189	0.0851896	-1.64561	0.0998432	0.590402	1380.22	1339.41	1232.42	1235.03	xks1	xylulose kinase Xks1 (predicted)	III	704973	706776	-
SPAC29A4.06c	351.152	-0.256277	0.155411	-1.64902	0.0991429	0.590402	414.067	350.703	295.858	343.982	SPAC29A4.06c	splicing protein, human NSRP1 ortholog	I	5136167	5137276	+
SPCC16C4.07	265.655	-0.277253	0.168393	-1.64647	0.0996676	0.590402	301.924	280.364	224.775	255.557	scw1	RNA-binding protein Scw1	III	673476	675161	+
SPAC19D5.07	224.121	-0.293045	0.177844	-1.64776	0.0994014	0.590402	246.93	246.681	200.761	202.114	uga1	4-aminobutyrate aminotransferase (GABA transaminase)	I	5223184	5224608	+
SPAC25B8.18	244.505	-0.300876	0.182632	-1.64744	0.0994673	0.590402	239.382	300.178	232.46	206	SPAC25B8.18	mitochondrial thioredoxin-related protein (predicted)	I	4191613	4191978	+
SPBC3D6.06c	2786.64	-0.110354	0.0671141	-1.64427	0.10012	0.591353	2885.53	2900.73	2649.28	2711.04	prs5	ribose-phosphate pyrophosphokinase Prs5 (predicted)	II	1279902	1281349	-
SPBC25B2.06c	436.55	0.222059	0.135431	1.63965	0.101079	0.592232	425.928	380.424	485.092	454.756	btb2	BTB/POZ family ubiquitin-type ligase substrate adaptor Btb2	II	2607314	2608370	-
SPAC31A2.02	428.102	0.217702	0.13274	1.64006	0.100992	0.592232	391.423	400.237	456.275	464.473	trm112	eRF1 methyltransferase complex and tRNA (m2G10) methyltransferase complex regulatory subunit Trm112 (predicted)	I	388400	388960	+
SPAC4G8.12c	717.576	0.181147	0.110473	1.63974	0.101059	0.592232	695.503	649.89	728.119	796.794	smp3	pig-Z, alpha-1,2-mannosyltransferase Smp3 (predicted)	I	784675	786563	-
SPAC1420.01c	1916.47	0.123659	0.0753562	1.64099	0.100799	0.592232	1873.01	1796.11	2000.89	1995.87	SPAC1420.01c	GATA-like domain protein (predicted)	I	1260973	1262760	-
SPBC1711.06	3757.7	0.106614	0.064926	1.64208	0.100574	0.592232	3501.24	3735.88	3887.46	3906.23	rpl401	60S ribosomal protein L4 (predicted)	II	2143137	2144228	+
SPBC1683.12	404.351	-0.246997	0.150449	-1.64173	0.100645	0.592232	451.807	425.995	323.715	415.888	SPBC1683.12	carboxylic acid transmembrane transporter (predicted)	II	168671	170119	+
SPAC22F8.02c	239.481	-0.28566	0.17417	-1.64012	0.10098	0.592232	257.713	268.476	225.736	206	pvg5	Golgi 4,6-pyruvylated galactose (PvGal) residue biosynthesis protein Pvg5	I	4785162	4786280	-
SPAC57A10.10c	1086.88	0.152714	0.093216	1.63828	0.101363	0.59254	997.427	1061.03	1112.35	1176.73	sla1	La protein, tRNA chaperone Sla1	I	1382542	1383513	-
SPCC553.06	2281.97	-0.11639	0.0710355	-1.63848	0.101323	0.59254	2359.32	2388.54	2217.02	2163	swp1	oligosaccharyltransferase delta subunit Swp1 (predicted)	III	295482	296487	-
SPBC4C3.09	927.89	0.161516	0.0987929	1.6349	0.102071	0.595945	913.319	839.111	991.317	967.813	otg3	alpha-1,3-galactosyltransferase	II	3119227	3120357	-
SPBC1773.17c	664.481	-0.18267	0.111767	-1.63438	0.102179	0.595945	683.642	729.145	637.824	607.312	gor2	glyoxylate reductase (predicted)	II	321662	322684	-
SPAC6B12.18	80.2239	0.486316	0.298735	1.62792	0.103542	0.59688	58.2281	75.2922	97.9791	89.3964	gon7	EKC/KEOPS complex subunit Gon7 (predicted)	I	2416385	2416606	+
SPBC21C3.18	386.574	0.234892	0.144232	1.62857	0.103404	0.59688	382.796	327.917	426.497	409.086	spo4	serine/threonine protein kinase Spo4	II	3827178	3828849	+
SPBC23E6.05	424.401	0.21888	0.134218	1.63078	0.102936	0.59688	388.188	396.275	441.866	471.274	arx1	ribosomal export complex protein Arx1, peptidase family (predicted)	II	3850011	3851437	+
SPAC644.06c	491.132	0.215281	0.132259	1.62772	0.103583	0.59688	446.416	462.65	570.584	484.878	cdr1	NIM1 family serine/threonine protein kinase Cdr1/Nim1	I	2679765	2681546	-
SPAC3F10.17	543.51	0.204099	0.125041	1.63225	0.102626	0.59688	538.071	472.557	562.899	600.511	ltv1	ribosome biogenesis protein Ltv1 (predicted)	I	2852036	2853332	+
SPAC6G10.04c	2087.24	-0.129044	0.0791483	-1.6304	0.103016	0.59688	2064.94	2295.42	2032.59	1956.03	pre5	20S proteasome complex subunit alpha 6 Pre5	I	3221056	3222141	-
SPBC365.15	783.82	-0.168903	0.103778	-1.62754	0.103623	0.59688	828.134	831.186	759.818	716.143	alp4	gamma tubulin complex GCP2 subunit Alp4	II	2524061	2526415	+
SPAC57A7.09	766.231	-0.17924	0.109881	-1.63122	0.102845	0.59688	843.23	784.624	761.739	675.331	SPAC57A7.09	ubiquitin-protein ligase E3, human RNF13 family homolog, unknown biological role	I	1525031	1526149	-
SPAC16E8.10c	688.738	-0.18922	0.116225	-1.62805	0.103514	0.59688	792.55	675.648	652.233	634.52	rsm7	mitochondrial ribosomal protein subunit S7, Rsm7(predicted)	I	3518894	3519760	-
SPBC28E12.06c	380.117	-0.23463	0.144041	-1.62892	0.103331	0.59688	395.736	425.995	328.518	370.218	lvs1	beige protein homolog Lvs1	II	1846434	1854263	-
SPAPYUG7.06	97.1884	-0.435318	0.266656	-1.6325	0.102573	0.59688	117.535	106.003	81.6492	83.5662	sdu1	PPPDE peptidase family deubiquitinase/desumoylase Sdu1 (predicted)	I	4754183	4754788	+
SPBC1711.18	466.364	-0.211979	0.130294	-1.62692	0.103754	0.596963	479.843	521.101	445.709	418.803	tam9	mitochondrial ribosomal protein subunit L36, MrpL36/YmL36 (predicted)	II	2145039	2145299	+
SPBC14C8.06	2658.83	-0.116743	0.0718636	-1.62451	0.104267	0.599242	2686.04	2846.24	2629.1	2473.95	arc1	ARP2/3 actin-organizing complex subunit Sop2	II	2214438	2215618	+
SPBP8B7.29	248.234	0.2816	0.173572	1.62238	0.104722	0.59934	209.19	238.755	263.199	281.793	abz1	para-aminobenzoate synthase (predicted)	II	3692563	3694719	+
SPBC337.12	724.528	0.17347	0.106933	1.62224	0.104753	0.59934	666.389	695.462	755.015	781.247	red5	NURS complex subunit, zf-CCCH type zinc finger Red5	II	1052080	1053471	+
SPAC1F3.05	768.849	-0.174167	0.107296	-1.62324	0.104538	0.59934	772.062	857.934	713.71	731.69	gga21	Golgi localized Arf binding gamma-adaptin ortholog Gga21	I	623272	625086	+
SPAC27E2.06c	422.588	-0.22655	0.139584	-1.62304	0.104582	0.59934	491.704	420.051	396.719	381.878	msm1	mitochondrial methionine-tRNA ligase Msm1 (predicted)	I	4016578	4018197	-
SPAC144.18	1455.93	0.139856	0.0862718	1.62111	0.104994	0.599378	1320.92	1449.37	1562.86	1490.59	vrg4	Golgi GDP-mannose transmembrane transporter Vrg4	I	4690170	4691207	+
SPBC582.09	2184.05	-0.116552	0.0718931	-1.62118	0.104979	0.599378	2242.86	2301.36	2093.1	2098.87	pex11	peroxisomal biogenesis factor 11 (predicted)	II	434873	435973	+
SPAC3F10.16c	659.322	0.181524	0.112294	1.6165	0.105986	0.599873	614.63	621.16	729.079	672.416	SPAC3F10.16c	GTP binding protein, HSR1-related (predicted)	I	2849710	2851669	-
SPBC1105.08	985.189	0.152049	0.0939605	1.61822	0.105615	0.599873	928.415	938.18	1043.19	1030.97	emp70	EMP70 family endosomal transport protein Emp70	II	3520361	3522398	+
SPBC2F12.05c	1444.45	0.138823	0.0858177	1.61764	0.105739	0.599873	1416.88	1333.46	1458.16	1569.3	osh2	sterol transfer protein Osh2 (predicted)	II	1728834	1733137	+
SPCC18.18c	2689.38	0.110619	0.0682793	1.62009	0.105213	0.599873	2615.95	2556.96	2832.75	2751.85	fum1	fumarate hydratase (predicted)	III	1988631	1990722	-
SPCC830.07c	4676.56	-0.0962118	0.0595277	-1.61625	0.10604	0.599873	4851.27	4813.74	4570.43	4470.79	psi1	Hsp40 family DNAJ domain protein Psi1	III	2193953	2195092	-
SPAC1142.05	1369.26	-0.13651	0.0843647	-1.61809	0.105643	0.599873	1425.51	1442.44	1337.13	1271.96	ctr5	plasma membrane copper transporter complex subunit Ctr5	I	3635765	3636286	+
SPBC19G7.05c	787.821	-0.167816	0.103859	-1.61581	0.106136	0.599873	825.977	841.093	718.513	765.7	bgs1	primary septum and spore wall linear 1,3-beta-glucan synthase catalytic subunit Bgs1	II	2351054	2356243	-
SPAC17C9.10	433.288	-0.219037	0.135337	-1.61846	0.105563	0.599873	448.572	483.455	381.35	419.774	stm1	vacuolar amino acid transmembrane transporter Stm1 (predicted)	I	4481960	4482775	-
SPCC417.02	70.2245	-0.50862	0.314728	-1.61607	0.10608	0.599873	78.7158	86.1897	52.8318	63.1605	dad5	DASH complex subunit Dad5	III	1670321	1670605	-
SPBPB2B2.19c	2.6658	3.23409	2.00612	1.61211	0.106938	0.603076	0	0.990686	3.84232	5.8302	SPBPB2B2.19c	S. pombe specific 5Tm protein family	II	4503910	4504944	-
SPAC13A11.03	174.179	0.378986	0.235022	1.61255	0.106842	0.603076	169.293	133.743	155.614	238.066	mcp7	meiosis specific coiled-coil protein Mcp7	I	578521	579247	+
SPBPB2B2.17c	2.66024	3.2314	2.0067	1.61031	0.107331	0.604624	0	0.990686	5.76347	3.8868	ftm7	sub-telomeric 5Tm protein family Ftm7	II	4501956	4502396	-
SPBC83.05	884.498	-0.16464	0.102276	-1.60976	0.10745	0.604628	971.547	898.552	800.162	867.728	SPBC83.05	mitochondrial RNA-binding protein (predicted)	II	1517668	1519989	+
SPCC757.11c	457.799	0.212702	0.132206	1.60887	0.107646	0.605063	444.259	404.2	473.565	509.171	SPCC757.11c	transmembrane transporter (predicted)	III	69641	71056	-
SPAC4F10.22	98.4671	-0.442363	0.275093	-1.60805	0.107824	0.605403	109.987	116.901	97.0185	69.9624	cmc4	mitochondrial intermembrane space protein, mature-T-Cell Proliferation I type ortholog, unknown biological role Cmc4	I	4878241	4878453	+
SPCC1450.11c	371.912	0.243669	0.151769	1.60553	0.108378	0.607844	306.237	374.479	383.271	423.661	cek1	serine/threonine protein kinase Cek1	III	1748633	1752649	-
SPAC1071.08	898.148	0.162046	0.100987	1.60461	0.108579	0.608059	804.411	890.627	938.486	959.068	rpp203	60S acidic ribosomal protein A2	I	3869145	3869571	+
SPBC21.05c	588.31	-0.188745	0.117651	-1.60427	0.108654	0.608059	652.371	601.347	541.767	557.756	ral2	Ras1-Scd pathway protein Ral2	II	3220346	3222181	-
SPAC12G12.06c	1089.31	0.1505	0.0939405	1.60207	0.10914	0.610108	1044.87	1020.41	1197.84	1094.13	rcl1	rRNA processing protein Rcl1 (predicted)	I	336428	337519	+
SPAC2E1P5.04c	304.817	-0.251161	0.156836	-1.60143	0.109282	0.610235	339.664	322.964	264.159	292.482	cwg2	geranylgeranyltransferase I beta subunit Cwg2	I	3327940	3329007	-
SPBC660.11	3064.16	-0.105939	0.066181	-1.60075	0.109433	0.610414	3196.08	3157.32	3007.57	2895.67	tcg1	single-stranded telomeric binding protein Tgc1	II	215144	216496	+
SPBC713.07c	688.96	-0.174374	0.10911	-1.59815	0.110009	0.612957	728.93	732.117	629.179	665.614	SPBC713.07c	vacuolar polyphosphatase (predicted)	II	879919	881652	-
SPCC1442.03	311.69	0.244794	0.153342	1.59639	0.110402	0.61448	279.279	291.262	342.927	333.293	mme1	mitochondrial carrier, magnesium ion Mme1 (predicted)	III	1771492	1772631	+
SPBC119.08	763.011	0.167709	0.105153	1.59491	0.110733	0.614983	718.147	719.238	781.911	832.747	pmk1	MAP kinase Pmk1	II	730860	732583	+
SPCC191.09c	51.8315	-0.579154	0.363059	-1.59521	0.110666	0.614983	65.7762	58.4505	40.3443	42.7548	gst1	glutathione S-transferase Gst1	III	1719325	1720014	-
SPAC30.04c	1355.84	-0.134181	0.0842314	-1.593	0.11116	0.616683	1431.98	1405.78	1268.92	1316.65	abc4	vacuolar phytochelatin and glutathione S-conjugate ABC family transmembrane transporter Abc4	I	4395932	4400341	-
SPAC1F8.04c	2412.86	0.116021	0.0728745	1.59206	0.111371	0.617186	2254.72	2376.66	2579.15	2440.91	SPAC1F8.04c	hydrolase, implicated in cellular detoxification (predicted)	I	92480	93871	-
SPAP11E10.01	413.933	-0.224007	0.140862	-1.59026	0.111777	0.618766	416.223	475.529	400.561	363.416	SPAP11E10.01	ornithine cyclodeaminase-like protein (predicted)	I	1855806	1856798	+
SPAC6F12.16c	724.095	0.173714	0.109375	1.58825	0.11223	0.619932	710.599	650.881	788.635	746.266	mtr4	TRAMP complex ATP-dependent RNA helicase subunit Mtr4	I	1345089	1348442	-
SPAC2C4.04c	533.257	-0.192905	0.121428	-1.58863	0.112143	0.619932	579.047	558.747	485.092	510.142	aim29	DUF2340, human C2orf76 ortholog, implicated in mitochondrial organisation	I	4265722	4266099	-
SPAC1142.06	1503.98	-0.139791	0.0880674	-1.58732	0.11244	0.62042	1509.62	1643.55	1501.38	1361.35	get3	GET complex (ER membrane insertion) subunit Get3 (predicted)	I	3637102	3638091	+
SPBC106.10	1684.53	-0.12745	0.0803243	-1.5867	0.112581	0.620532	1754.39	1763.42	1670.45	1549.86	pka1	cAMP-dependent protein kinase catalytic subunit Pka1	II	396992	398530	+
SPBC3B9.16c	985.613	0.162302	0.10236	1.5856	0.112831	0.621237	952.138	908.459	966.342	1115.51	nup120	nucleoporin, WD repeat Nup120	II	4015357	4018767	-
SPBC16E9.11c	943.372	0.164342	0.103769	1.58373	0.113254	0.622898	946.747	833.167	953.855	1039.72	pub3	HECT-type ubiquitin-protein ligase E3 Pub3 (predicted)	II	1935777	1938479	-
SPBPB2B2.14c	2.69326	3.21754	2.0356	1.58063	0.113962	0.623959	1.0783	0	1.92116	7.7736	SPBPB2B2.14c	S. pombe specific DUF999 protein family 8	II	4492580	4493322	-
SPCC16C4.20c	398.69	0.218661	0.138374	1.58022	0.114057	0.623959	365.543	371.507	445.709	412.001	hap2	Ino80 complex, HMG box protein Hap2	III	660851	661181	-
SPAC29A4.02c	5767.77	0.0924411	0.0584755	1.58085	0.113912	0.623959	5623.33	5542.89	5826.87	6077.98	SPAC29A4.02c	translation elongation factor EF-1 gamma subunit	I	5143818	5145340	+
SPAC1687.15	1426.32	-0.129996	0.0822608	-1.58029	0.114041	0.623959	1475.11	1505.84	1369.79	1354.55	gsk3	serine/threonine protein kinase Gsk3	I	929939	931631	+
SPAC6C3.08	605.926	-0.182953	0.115701	-1.58125	0.11382	0.623959	656.684	632.058	585.953	549.01	nas6	proteasome assembly chaperone, gankyrin	I	2338175	2339017	+
SPAPJ695.01c	7.40547	1.60648	1.02044	1.5743	0.115417	0.626749	5.3915	1.98137	8.64521	13.6038	SPAPJ695.01c	S. pombe specific UPF0321 family protein 3	I	77578	77931	-
SPBC1347.11	246.494	0.275693	0.175124	1.57427	0.115425	0.626749	207.033	238.755	258.396	281.793	sro1	stress responsive orphan 1	II	4082207	4082527	+
SPBC14C8.19	294.503	0.247859	0.157393	1.57478	0.115307	0.626749	262.027	276.401	317.952	321.633	tam10	nucleolar RNA binding protein, human KNOP1 ortholog, implicated in mRNA processing	II	2218540	2219196	-
SPAC23A1.06c	315.136	0.243388	0.154361	1.57675	0.114853	0.626749	303.002	274.42	334.281	348.84	cmk2	MAPK-activated protein kinase Cmk2	I	4090158	4092079	-
SPAC1834.01	2026.38	0.116054	0.0736711	1.57529	0.115188	0.626749	1930.16	1959.58	2135.37	2080.41	erf1	cytoplasmic translation release factor class I eRF1	I	4691927	4693228	+
SPAC15E1.04	1102.11	-0.142304	0.0903003	-1.5759	0.115048	0.626749	1152.7	1160.09	1032.62	1063.04	hal3	thymidylate synthase / phosphopantothenoylcysteine decarboxylase / protein phosphatase inhibitor moonlighting protein Hal3	I	3723833	3725710	+
SPBPB2B2.05	816.729	-0.16829	0.106748	-1.57652	0.114907	0.626749	823.82	904.497	804.965	733.633	SPBPB2B2.05	class I glutamine amidotransferase family protein	II	4466754	4467515	+
SPBC342.06c	208.063	0.291964	0.185626	1.57286	0.115751	0.627161	191.937	182.286	220.933	237.095	rtt109	histone lysine acetyltransferase Rtt109	II	4213640	4214749	-
SPBC12C2.07c	2334.33	-0.112812	0.0717473	-1.57235	0.115868	0.627161	2421.86	2429.16	2184.36	2301.96	srm1	spermidine synthase Srm1 (predicted)	II	2463200	2464096	+
SPBC25H2.15	437.323	-0.211598	0.13451	-1.5731	0.115696	0.627161	455.042	483.455	385.192	425.605	trs401	SSU-rRNA maturation protein Tsr4 homolog 1 Tsr401 (predicted)	II	3248812	3250002	-
SPBC3H7.11	216.857	0.31633	0.201809	1.56747	0.117005	0.6281	166.058	219.932	213.249	268.189	trm141	tRNA(Ser) residue 32 (cytosine-3-)-methyltransferase Trm141	II	1863368	1864186	-
SPAC4C5.01	304.593	0.261849	0.166941	1.56851	0.116762	0.6281	298.689	255.597	299.701	364.387	SPAC4C5.01	pseudouridine-5'-phosphatase (predicted)	I	1192545	1193613	+
SPAC20H4.04	304.491	0.245249	0.156269	1.5694	0.116555	0.6281	274.966	282.346	344.848	315.802	fml2	ATP-dependent 3' to 5' DNA helicase (predicted)	I	2116869	2119220	+
SPBC4F6.11c	529.83	0.189808	0.121013	1.56849	0.116767	0.6281	491.704	498.315	571.544	557.756	asn2	asparagine synthase (predicted)	II	2709848	2711494	-
SPAC167.06c	679.61	-0.181769	0.115899	-1.56835	0.116801	0.6281	710.599	734.099	684.893	588.85	mug143	Schizosaccharomyces specific protein Mug143	I	1550133	1550498	+
SPAC15A10.03c	458.431	-0.217549	0.138624	-1.56935	0.116567	0.6281	515.427	470.576	385.192	462.529	rad54	DNA-dependent ATPase Rad54/Rhp54	I	3680587	3683145	-
SPCC1235.13	303.472	-0.253025	0.161431	-1.56739	0.117024	0.6281	360.152	300.178	278.568	274.991	ght6	plasma membrane glucose/fructose:proton symporter Ght6	III	204733	206340	+
SPBC21B10.15	192.111	-0.321213	0.204605	-1.56992	0.116434	0.6281	190.859	235.783	188.273	153.529	SPBC21B10.15	Schizosaccharomyces specific protein	II	1665622	1665917	-
SPAC19A8.07c	253.848	0.28079	0.179564	1.56373	0.117881	0.631104	214.582	243.709	308.346	248.755	imp4	U3 snoRNP-associated protein Imp4 (predicted)	I	2474717	2475586	+
SPCC1393.13	268.224	0.258066	0.165563	1.55871	0.119065	0.631104	231.834	256.588	293.937	290.538	SPCC1393.13	metal-dependent phosphatase involved in cellular detoxification/metabolite repair	III	825105	826540	+
SPBC14C8.02	519.415	0.189993	0.121848	1.55926	0.118935	0.631104	483.078	487.418	553.293	553.869	tim44	TIM23 translocase complex subunit Tim44 (predicted)	II	2205554	2206837	+
SPBC27B12.07	650.227	0.175289	0.112225	1.56194	0.118302	0.631104	610.317	611.253	712.75	666.586	SPBC27B12.07	mitochondrial calcium uniporter regulator	II	1334112	1335162	+
SPBC21D10.05c	859.345	0.164504	0.105259	1.56285	0.118088	0.631104	805.489	815.335	968.264	848.294	ucp3	GTPase activating protein Ucp3	II	2439122	2441134	+
SPBC887.17	2019.64	0.120674	0.0773662	1.55977	0.118813	0.631104	1908.59	1961.56	2017.22	2191.18	SPBC887.17	nucleobase transmembrane transporter (predicted)	II	3576032	3577909	+
SPAC19G12.10c	10768.9	0.0831151	0.053137	1.56417	0.117778	0.631104	10539.3	10378.4	10898.7	11259.1	cpy1	vacuolar carboxypeptidase Y	I	4061510	4064518	-
SPAC23A1.10	15160.9	0.078868	0.0505838	1.55916	0.118959	0.631104	14910.7	14582.9	15593.1	15556.9	tef102	translation elongation factor EF-1 alpha Ef1a-b	I	4095202	4096584	+
SPAC26A3.16	2341.59	-0.112311	0.0718735	-1.56262	0.118143	0.631104	2481.17	2384.58	2293.86	2206.73	dsk2	UBA domain protein Dph1/Dsk2	I	3369743	3370807	+
SPBC337.02c	1190.71	-0.1374	0.0880702	-1.56011	0.118733	0.631104	1232.5	1262.13	1151.73	1116.48	SPBC337.02c	DUF1773 family protein	II	1032857	1033776	-
SPCC18.16c	428.261	-0.207825	0.13326	-1.55955	0.118866	0.631104	446.416	471.567	401.522	393.538	fmn1	riboflavin kinase Fmn1	III	1985451	1985942	-
SPAC29E6.05c	402.135	-0.213619	0.136992	-1.55936	0.118912	0.631104	437.789	425.995	382.31	362.444	mxr1	peptide-methionine (S)-S-oxide reductase MsrA	I	4410605	4411172	-
SPAC23C4.02	437.67	0.206674	0.132645	1.5581	0.119209	0.631217	407.597	405.191	486.053	451.84	crn1	actin binding protein, coronin Crn1	I	1032182	1034167	+
SPBC36B7.07	358.04	-0.227018	0.145752	-1.55757	0.119336	0.631232	398.971	373.489	342.927	316.774	tlg1	SNARE Tlg1 (predicted)	II	2393674	2394442	+
SPBC16A3.02c	4421.16	0.0998006	0.0641336	1.55614	0.119676	0.631724	4253.89	4282.74	4747.18	4400.83	SPBC16A3.02c	mitochondrial CH-OH group oxidoreductase, human RTN4IP1 ortholog, implicated in mitochondrial organization or tethering	II	4297584	4298627	+
SPBC21B10.02	427.7	-0.207446	0.133283	-1.55644	0.119605	0.631724	456.121	460.669	408.246	385.765	SPBC21B10.02	conserved fungal protein	II	1669719	1670144	-
SPAC18G6.03	3451.15	-0.101199	0.0650636	-1.55538	0.119856	0.632022	3553	3591.24	3413.9	3246.45	ypt3	Rab11 family GTPase Ypt3	I	2215815	2216757	+
SPAPB17E12.05	3386.27	-0.103784	0.0667654	-1.55445	0.120077	0.632537	3406.35	3609.07	3202.57	3327.1	rpl3703	60S ribosomal protein L37 (predicted)	I	1275535	1275871	+
SPAC1687.01	399.986	0.216851	0.139634	1.553	0.120423	0.633428	363.387	376.461	407.285	452.812	rpc19	DNA-directed RNA polymerase I and III subunit Rpc19	I	903101	903676	+
SPAC3A12.18	7286.17	-0.0882456	0.0568335	-1.5527	0.120494	0.633428	7346.45	7670.88	7150.55	6976.81	zwf1	glucose-6-phosphate 1-dehydrogenase Zwf1	I	1454911	1456529	+
SPBC19C7.12c	824.654	0.166508	0.107378	1.55067	0.120981	0.635335	722.46	831.186	856.836	888.134	omh1	alpha-1,2-mannosyltransferase Omh1	II	2845923	2847095	-
SPBC1921.05	1975.31	-0.126455	0.0816358	-1.54902	0.121377	0.636764	1959.27	2163.66	1817.42	1960.89	ape2	M1 aminopeptidase Ape2	II	2413507	2416155	+
SPAC2F7.17	403.677	0.21288	0.137549	1.54767	0.121702	0.637814	377.405	370.517	416.891	449.897	mrf1	mitochondrial translation release factor (predicted)	I	570236	571805	+
SPCC1259.03	355.17	0.223678	0.14477	1.54505	0.122333	0.640466	337.508	318.01	382.31	382.85	rpa12	DNA-directed RNA polymerase complex I TFIIS subunit Rpa12	III	1040133	1040737	+
SPAC4A8.06c	755.433	0.164123	0.106336	1.54344	0.122725	0.64186	683.642	741.033	791.517	805.539	SPAC4A8.06c	esterase/lipase, implicated in fatty acid biosynthetic process (predicted)	I	2554013	2555749	-
SPBC1539.02	343.967	-0.234409	0.151952	-1.54265	0.122916	0.642203	402.206	341.787	312.188	319.689	SPBC1539.02	nuclear protein, human IK ortholog, implicated in meiotic chromosome segregation in fission yeast, splicing or spindle checkpoint in human	II	4364016	4365176	+
SPAC13C5.01c	1947.99	-0.126459	0.0823348	-1.53591	0.124561	0.64683	2075.73	1991.28	1975.91	1749.06	pre9	20S proteasome complex subunit alpha 3 Pre9	I	424477	425223	-
SPAC7D4.10	1453.16	-0.126761	0.0825151	-1.53621	0.124487	0.64683	1503.15	1530.61	1359.22	1419.65	vma13	V-type ATPase V1 subunit H (predicted)	I	2620295	2622195	-
SPCC14G10.03c	1180.88	-0.135222	0.0880053	-1.53652	0.124411	0.64683	1252.98	1219.53	1127.72	1123.29	ump1	proteasome maturation factor Ump1 (predicted)	III	748037	748530	-
SPAC821.06	1097.44	-0.142341	0.0925276	-1.53836	0.123961	0.64683	1113.88	1188.82	1021.1	1065.95	spn2	mitotic and meiotic (sporulation) septin Spn2	I	990250	991525	+
SPAC8E11.04c	649.836	-0.172458	0.112185	-1.53726	0.12423	0.64683	670.702	706.359	597.48	624.803	SPAC8E11.04c	palmitoyl-(protein) hydrolase (predicted)	I	3380756	3381781	+
SPCC285.07c	35.7955	-0.677733	0.441137	-1.53633	0.124457	0.64683	48.5235	39.6275	30.7385	24.2925	wtf18	wtf meiotic drive-related element Wtf18	III	1807004	1808534	-
SPAC2C4.13	735.185	-0.167247	0.109071	-1.53337	0.125184	0.649408	796.863	758.866	726.198	658.813	vma16	V-type ATPase V0 subunit c''(predicted)	I	4281493	4282092	+
SPBPB2B2.09c	285.674	-0.24743	0.161428	-1.53276	0.125335	0.649534	305.159	315.038	275.686	246.812	pan5	2-dehydropantoate 2-reductase Pan5 (predicted)	II	4479110	4480162	-
SPBC839.12	217.292	0.278061	0.181535	1.53172	0.12559	0.650198	202.72	190.212	243.026	233.208	rpc31	DNA-directed RNA polymerase III complex subunit Rpc31	II	622332	622964	+
SPCC584.15c	1017.88	0.143642	0.09397	1.5286	0.126364	0.65288	986.644	948.087	1090.26	1046.52	SPCC584.15c	arrestin involved in ubiquitin-dependent endocytosis	III	1520806	1523191	-
SPBPB2B2.11	166.257	-0.321447	0.210242	-1.52894	0.126281	0.65288	195.172	174.361	159.456	136.038	tgd1	nucleotide-sugar 4,6-dehydratase (predicted)	II	4484059	4485156	+
SPAC3C7.10	310.289	0.242531	0.158792	1.52735	0.126675	0.653161	307.315	261.541	345.808	326.491	pex13	peroxin 13 (predicted)	I	2085248	2086114	+
SPAC18G6.07c	822.672	0.163097	0.106856	1.52632	0.126929	0.653161	725.695	826.232	889.496	849.266	mra1	rRNA (pseudouridine) methyltransferase Mra1	I	2230333	2231412	-
SPBC146.12	991.676	-0.14544	0.0952655	-1.52668	0.12684	0.653161	1020.07	1063.01	966.342	917.285	coq6	monooxygenase Coq6 (predicted)	II	1022416	1023855	+
SPBC460.01c	462.731	-0.199749	0.13075	-1.52771	0.126584	0.653161	469.06	520.11	432.261	429.491	SPBC460.01c	amino acid transmembrane transporter (predicted)	AB325691	1479	3197	-
SPAC3A11.11c	693.818	-0.168374	0.110353	-1.52578	0.127064	0.6532	722.46	745.987	681.05	625.775	SPAC3A11.11c	oxidoreductase, implicated in vitamin metabolism, or cellular detoxification (predicted)	I	3446508	3447512	+
SPAC1A6.07	1220.26	0.134991	0.0885646	1.52421	0.127455	0.654552	1147.31	1178.92	1239.15	1315.68	sle1	eisosome assembly protein Seg1	I	1084175	1086085	+
SPAC144.11	1462.44	0.126293	0.0829007	1.52342	0.127654	0.654913	1364.05	1432.53	1502.35	1550.83	rps1102	40S ribosomal protein S11 (predicted)	I	4674612	4675070	+
SPCC1223.03c	4000.5	-0.0973884	0.0639868	-1.52201	0.128007	0.655574	4208.6	4062.8	3966.23	3764.37	gut2	glycerol-3-phosphate dehydrogenase Gut2 (predicted)	III	1840687	1842636	-
SPBC31F10.07	908.14	-0.147454	0.0968891	-1.52188	0.128039	0.655574	949.981	958.984	856.836	866.756	lsb5	actin cortical patch component Lsb5 (predicted)	II	3763170	3764084	+
SPBC4B4.11	333.324	-0.226767	0.149056	-1.52135	0.128171	0.655597	348.291	370.517	303.543	310.944	SPBC4B4.11	mitochondrial conserved fungal protein, implicated in mitochondrial translation	II	3433726	3434117	+
SPBC365.04c	215.545	0.278742	0.183512	1.51893	0.12878	0.657324	198.407	191.202	223.815	248.755	SPBC365.04c	RNA-binding protein, involved in ribosome biogenesis (predicted)	II	2504297	2504998	-
SPAC1952.02	356.822	0.221487	0.14591	1.51797	0.129023	0.657324	346.134	313.057	380.389	387.708	tma23	ribosome biogenesis protein Tma23 (predicted)	I	4969892	4970645	+
SPAC4G9.02	390.486	-0.21822	0.143674	-1.51886	0.128797	0.657324	452.886	387.358	359.257	362.444	rnh201	ribonuclease H2 complex subunit Rnh201	I	2254588	2255568	+
SPAC24C9.15c	258.21	-0.258789	0.170434	-1.51841	0.12891	0.657324	265.262	297.206	245.908	224.463	spn5	meiotic septin Spn5	I	3074467	3075988	-
SPAC4A8.11c	4686.49	-0.100286	0.0661262	-1.51658	0.129372	0.658445	4938.61	4760.25	4315.88	4731.21	fas2	fatty acid synthase alpha subunit Fas2	I	2567040	2572568	-
SPAC25G10.03	5784.72	-0.0868171	0.0573234	-1.51451	0.129896	0.658702	5917.71	5999.6	5673.18	5548.41	zip1	DNA-binding transcription factor Zip1	I	4300066	4301058	+
SPAC732.02c	1144.94	-0.139936	0.0923709	-1.51494	0.129788	0.658702	1187.21	1213.59	1140.21	1038.75	SPAC732.02c	fructose-2,6-bisphosphate 2-phosphatase activity (predicted)	I	2059251	2060477	-
SPBP16F5.04	643.106	-0.171349	0.113089	-1.51518	0.129727	0.658702	700.894	661.778	588.835	620.916	ubc7	Hrd1 ubiquitin ligase complex ubiquitin conjugating enzyme E2 Ubc7	II	1905799	1906744	+
SPBC16E9.03c	286.495	-0.243301	0.160664	-1.51435	0.129938	0.658702	318.098	303.15	250.711	274.019	coa1	cytochrome c oxidase assembly protein Coa1 (predicted)	II	1920763	1921512	-
SPAPB1E7.11c	332.532	0.225375	0.148979	1.5128	0.130331	0.660044	304.08	309.094	349.651	367.303	mpa1	mitochondrial translational activator, Mpa1	I	3317673	3318632	-
SPAC212.08c	9.10628	1.33528	0.883312	1.51167	0.130618	0.660841	5.3915	4.95343	13.4481	12.6321	SPAC212.08c	S. pombe specific GPI anchored protein family 1	I	12158	12994	+
SPCC191.02c	1120.12	-0.144564	0.0957501	-1.50981	0.131092	0.662585	1108.49	1243.31	1035.5	1093.16	acs1	acetyl-CoA ligase (predicted)	III	1708234	1710222	-
SPAC6B12.15	11872.4	0.078956	0.0523429	1.50844	0.131442	0.6637	11410.6	11684.2	12063	12331.8	cpc2	RACK1 ortholog Cpc2	I	2439532	2440926	+
SPCC1450.09c	193.439	0.293729	0.194862	1.50737	0.131715	0.664419	168.215	179.314	197.879	228.349	SPCC1450.09c	phospholipase (predicted)	III	1741588	1743459	-
SPAC17H9.01	449.77	0.19554	0.129908	1.50522	0.132267	0.666547	421.615	417.079	473.565	486.822	cid16	poly(A/U) polymerase Cid16 (predicted)	I	2000985	2004593	+
SPAC3H5.07	2781.37	0.103331	0.0687124	1.50382	0.132627	0.666819	2656.93	2706.55	2954.74	2807.24	rpl702	60S ribosomal protein L7b involved in cytoplasmic translation	I	3429717	3430760	-
SPAC1F7.07c	2135.29	-0.128292	0.0853293	-1.50349	0.132712	0.666819	2197.57	2262.73	2205.49	1875.38	fip1	plasma membrane iron transmembrane transporter Fip1	I	4233303	4234496	-
SPBC1539.05	582.518	-0.17637	0.117238	-1.50438	0.132483	0.666819	632.962	603.328	534.082	559.699	cog3	Golgi transport complex subunit Cog3 (predicted)	II	4370000	4372478	+
SPBC2D10.13	191.8	0.292986	0.195054	1.50208	0.133076	0.667364	185.467	159.5	207.485	214.746	est1	telomerase regulator Est1	II	2988674	2990187	+
SPBP26C9.02c	309.039	0.231028	0.153858	1.50156	0.13321	0.667364	280.358	288.29	340.045	327.463	car1	arginase Car1	II	324191	325162	-
SPBC2D10.17	696.519	0.163754	0.109056	1.50156	0.133212	0.667364	636.196	677.629	744.449	727.803	clr1	SHREC complex intermodule linker subunit Clr1	II	2997238	3000954	+
SPAC24C9.03	1147.22	-0.13548	0.0902774	-1.50071	0.133431	0.66781	1176.42	1225.48	1120.04	1066.93	mvd1	diphosphomevalonate decarboxylase mvd1 (predicted)	I	3041282	3042463	+
SPBC3B9.18c	606.24	-0.173274	0.115506	-1.50012	0.133582	0.667912	637.275	647.909	589.795	549.982	vma7	V-type ATPase V1 subunit F (predicted)	II	4021202	4021622	-
SPAC23H3.05c	417.989	0.207799	0.138583	1.49946	0.133756	0.668125	364.465	411.135	464.92	431.435	swd1	Set1C complex subunit Swd1	I	2500613	2501809	-
SPAC11H11.05c	186.675	0.315319	0.210542	1.49765	0.134224	0.669227	183.311	149.594	180.589	233.208	fta6	Mis6-Sim4 complex Fta6	I	4782047	4782273	-
SPBC17A3.04c	1114.53	0.141728	0.094637	1.4976	0.134238	0.669227	999.583	1119.48	1158.46	1180.62	rar1	cytoplasmic methionine-tRNA ligase Mrs1 (predicted)	II	1407408	1409883	-
SPCC736.04c	1200.06	0.135025	0.0902256	1.49653	0.134517	0.669312	1193.68	1094.71	1258.36	1253.49	gma12	alpha-1,2-galactosyltransferase Gma12	III	316725	317852	-
SPCC1827.06c	4061.62	0.0923533	0.0617048	1.4967	0.134472	0.669312	3876.49	3986.52	4227.51	4155.96	SPCC1827.06c	aspartate semialdehyde dehydrogenase (predicted)	III	2386150	2387527	-
SPBC582.07c	2006.42	-0.111745	0.0747502	-1.49492	0.134935	0.670743	2035.83	2131.96	1909.63	1948.26	rpn7	19S proteasome regulatory subunit Rpn7	II	430551	431780	-
SPCC24B10.08c	438.832	0.20892	0.139854	1.49384	0.135218	0.671188	384.953	428.967	434.182	507.227	ada2	SAGA complex subunit Ada2	III	915382	916695	-
SPAC144.12	1168.92	-0.133382	0.0893041	-1.49357	0.135287	0.671188	1202.3	1243.31	1090.26	1139.8	rki1	ribose 5-phosphate isomerase Rki1 (predicted)	I	4676624	4677448	+
SPAC1705.02	320.859	0.225168	0.15097	1.49148	0.135836	0.673133	296.532	295.225	350.611	341.067	SPAC1705.02	SERF family protein, DUF, human 4F5S homolog, implicated in mRNA splicing	I	1568863	1569303	+
SPAC2G11.14	898.305	0.163651	0.109754	1.49107	0.135943	0.673133	849.7	845.055	859.718	1038.75	taf1	transcription factor TFIID complex subunit Taf111	I	838320	841387	+
SPBC660.14	114.857	0.36842	0.24732	1.48965	0.136316	0.673676	103.517	97.0873	137.363	121.462	mik1	mitotic inhibitor kinase Mik1	II	221699	223512	+
SPBC6B1.04	199.501	0.280173	0.18803	1.49004	0.136213	0.673676	180.076	180.305	220.933	216.689	mde4	microtubule-site clamp monopolin complex subunit Mde4	II	2633025	2634290	+
SPBC685.06	3504.26	0.0960357	0.0645694	1.48732	0.136929	0.675402	3310.38	3464.43	3596.41	3645.82	rps001	40S ribosomal protein S0A (p40)	II	2778923	2779856	+
SPBC3D6.13c	1838.82	-0.112533	0.0756388	-1.48777	0.136811	0.675402	1926.92	1894.19	1754.98	1779.18	pdi3	ER associated protein disulfide isomerase Pdi3	II	1293702	1295882	-
SPBC2A9.08c	696.152	-0.177349	0.119306	-1.4865	0.137147	0.675825	738.635	739.052	588.835	718.086	sec22	SNARE Sec22 (predicted)	II	2961668	2962652	-
SPAC6G9.02c	566.072	0.181647	0.122255	1.4858	0.137332	0.676086	565.029	496.334	590.756	612.171	nop9	pumilio family RNA-binding protein Nop9 (predicted)	I	3243258	3245225	-
SPBC31F10.17c	131.196	0.344548	0.232178	1.48398	0.137814	0.677796	114.3	116.901	156.574	137.01	SPBC31F10.17c	Schizosaccharomyces pombe specific protein	II	3788317	3788799	-
SPCC18.03	506.486	0.199153	0.134382	1.48199	0.138342	0.677796	518.662	425.004	520.634	561.643	SPCC18.03	shuttle craft like transcriptional repressor/ubiquitin-protein ligase E3 (predicted)	III	1955764	1958997	+
SPCC1840.07c	483.65	0.194584	0.131236	1.48271	0.138152	0.677796	417.302	484.446	509.107	523.746	SPCC1840.07c	vacuolar endopolyphosphatase (predicted)	III	2270637	2271635	-
SPBC106.16	1913.98	-0.113711	0.076718	-1.4822	0.138288	0.677796	1949.56	2028.93	1886.58	1790.84	pre6	20S proteasome complex subunit alpha 4 Pre6	II	409496	410453	+
SPBC11B10.08	392.511	-0.205378	0.138478	-1.4831	0.138047	0.677796	409.754	430.949	370.783	358.557	SPBC11B10.08	WW domain containing conserved fungal protein	II	1498801	1499415	+
SPBC28F2.03	10066.8	-0.0795531	0.0537639	-1.47967	0.13896	0.678919	10163	10525.1	9876.67	9702.42	ppi1	cyclophilin family peptidyl-prolyl cis-trans isomerase Cyp2	II	1576329	1576817	+
SPAC13A11.05	2152.66	-0.108181	0.0731098	-1.47971	0.138951	0.678919	2213.75	2252.82	2118.08	2025.99	ysp2	peptidase family M17 cytoplasmic leucyl aminopeptidase yspII (LAP yspII)	I	582492	584033	+
SPCC757.05c	738.897	-0.1688	0.114082	-1.47964	0.138969	0.678919	765.592	798.493	753.094	638.407	SPCC757.05c	peptidase family M20 protein involved in glutathione catabolism (predicted)	III	52910	54112	-
SPBC557.04	1381.37	0.126018	0.0852069	1.47897	0.13915	0.679151	1315.52	1326.53	1391.88	1491.56	ppk29	Ark1/Prk1 family protein kinase Ppk29	II	2492048	2494777	+
SPAC31G5.16c	1970.72	-0.111311	0.075379	-1.47668	0.139762	0.681489	1993.77	2099.26	1911.55	1878.3	dpm1	dolichyl-phosphate beta-D-mannosyltransferase catalytic subunit Dpm1	I	3017927	3018762	-
SPAC18B11.04	849.909	-0.154513	0.104816	-1.47414	0.140444	0.68412	843.23	947.096	824.177	785.133	ncs1	neuronal calcium sensor related protein Ncs1	I	310659	311434	-
SPAC56F8.13	109.074	-0.381783	0.259069	-1.47368	0.140569	0.68412	138.022	108.975	99.9002	89.3964	SPAC56F8.13	dubious	I	1149911	1150216	+
SPAC29E6.07	11.5736	1.14507	0.778922	1.47008	0.141541	0.685428	6.46979	7.92549	14.4087	17.4906	SPAC29E6.07	Schizosaccharomyces pombe specific protein, expressed during meiotic cell cycle	I	4414824	4415174	+
SPAC1F3.06c	931.139	0.15829	0.107678	1.47003	0.141553	0.685428	928.415	832.176	909.668	1054.29	spo15	mitotic and meiotic spindle pole body protein Spo15	I	625430	631303	-
SPCC553.10	27217.3	0.07784	0.0529407	1.47033	0.141474	0.685428	25608.5	27356.8	28122.9	27780.9	SPCC553.10	conserved fungal cell surface protein, Kre9/Knh1 family (predicted)	III	283422	284471	-
SPAC22A12.16	3573.58	-0.0939138	0.0638339	-1.47122	0.141231	0.685428	3630.63	3748.76	3498.43	3416.5	acl2	ATP-citrate synthase subunit 2 (predicted)	I	1186314	1187851	+
SPAC57A10.05c	576.885	-0.178398	0.121229	-1.47158	0.141136	0.685428	629.727	595.402	509.107	573.303	pof1	F-box/WD repeat protein Pof1	I	1373066	1374883	-
SPCC191.06	25.4886	-0.770605	0.524327	-1.4697	0.141642	0.685428	35.5839	28.7299	22.0933	15.5472	SPCC191.06	Schizosaccharomyces pombe specific protein	III	1714139	1714555	+
SPAC12G12.02	335.991	0.228071	0.155327	1.46833	0.142014	0.68564	314.863	304.141	329.479	395.482	efg1	rRNA processing protein Efg1 (predicted)	I	345839	346618	-
SPBC30B4.04c	435.032	0.193636	0.131944	1.46757	0.142222	0.68564	407.597	404.2	472.605	455.727	sol1	SWI/SNF complex subunit Sol1	II	1309127	1311724	-
SPAC1F7.04	3923.76	0.100811	0.0686446	1.46859	0.141944	0.68564	3658.67	3914.2	4220.78	3901.38	rho1	Rho family GTPase Rho1	I	4224180	4225119	+
SPCC550.03c	594.498	-0.172147	0.117294	-1.46766	0.142197	0.68564	643.745	616.207	536.964	581.077	ski2	Ski complex RNA helicase Ski2 (predicted)	III	1187735	1191376	-
SPAC144.10c	928.056	0.147722	0.100787	1.46569	0.142734	0.687462	888.518	872.795	1029.74	921.171	gwt1	pig-W	I	4671564	4672943	-
SPAC1687.09	672.469	0.175312	0.119784	1.46357	0.14331	0.689588	622.179	640.974	648.391	778.332	irs4	autophagy/CVT pathway ENTH/VHS domain protein Irs4 (predicted)	I	915092	919231	+
SPAC11D3.06	608.309	0.438564	0.300071	1.46153	0.143869	0.690456	510.035	523.082	848.191	551.926	SPAC11D3.06	MatE family transmembrane transporter (predicted)	I	116693	118060	+
SPCC622.01c	443.621	0.193184	0.132116	1.46223	0.143678	0.690456	410.832	417.079	491.816	454.756	SPCC622.01c	Schizosaccharomyces pombe specific protein	III	1404306	1404755	-
SPAC4G8.09	615.453	0.177826	0.121679	1.46144	0.143896	0.690456	571.499	583.514	599.401	707.398	SPAC4G8.09	mitochondrial leucine-tRNA ligase (predicted)	I	778532	781156	+
SPAC29A4.05	1073.41	-0.1345	0.092089	-1.46054	0.144142	0.690989	1093.4	1153.16	1032.62	1014.45	cam2	myosin I light chain Cam2	I	5137555	5137986	-
SPAC4A8.15c	2380.88	-0.112593	0.0771635	-1.45914	0.144526	0.69218	2344.22	2602.53	2345.73	2231.02	cdc3	profilin	I	2578990	2579478	-
SPAC23C11.17	1256.7	0.130676	0.0896708	1.45728	0.145038	0.693337	1197.99	1201.7	1375.55	1251.55	mdm28	mitochondrial inner membrane protein involved in translation Mdm28 (predicted)	I	2167170	2168683	+
SPCC645.08c	1611.02	0.116573	0.0799847	1.45745	0.144993	0.693337	1507.46	1584.11	1664.68	1687.84	snd1	RNA-binding protein, involved in chromatin silencing by small RNA, Snd1	III	1249557	1252193	-
SPBC1271.13	787.771	0.149038	0.102453	1.45469	0.145755	0.695471	747.261	746.977	830.901	825.945	mrpl8	mitochondrial ribosomal protein subunit L8 (predicted)	II	340970	341656	-
SPBC776.03	2460.66	-0.101447	0.0697385	-1.45468	0.145757	0.695471	2510.28	2583.71	2355.34	2393.3	SPBC776.03	homoserine dehydrogenase (predicted)	II	3176694	3177893	+
SPAC17G6.09	699.271	0.156587	0.107762	1.45308	0.1462	0.696938	659.919	662.769	727.158	747.237	sec62	ER protein translocation subcomplex subunit Sec62 (predicted)	I	3604092	3604913	+
SPCC584.11c	600.234	0.168879	0.116388	1.451	0.146779	0.699044	587.673	542.896	640.706	629.662	svf1	Svf1 family protein, lipocalin superfamily Svf1	III	1511583	1513196	-
SPAC1F12.04c	371.421	-0.207015	0.142825	-1.44943	0.147218	0.700484	396.814	399.247	360.217	329.406	SPAC1F12.04c	peroxisomal protein Pex11 paralog (predicted)	I	3811066	3811641	-
SPAC24C9.14	648.453	-0.162992	0.112513	-1.44864	0.147437	0.700874	668.545	701.406	629.179	594.68	otu1	ubiquitin-specific cysteine protease, OTU family, Otu1	I	3073178	3074167	+
SPAC1006.05c	327.987	0.221161	0.152897	1.44647	0.148047	0.701435	312.707	293.243	372.705	333.293	och1	alpha-1,6-mannosyltransferase Och1	I	5079186	5080376	-
SPCC188.09c	331.832	0.214783	0.148509	1.44626	0.148103	0.701435	306.237	308.103	356.375	356.614	pfl4	cell surface glycoprotein, flocculin Pfl4	III	1492938	1494767	-
SPAC26H5.12	566.195	0.174666	0.120663	1.44755	0.147742	0.701435	551.011	513.175	624.376	576.218	rpo41	mitochondrial RNA polymerase Rpo41	I	4147739	4151203	+
SPAC2G11.15c	298.907	-0.22809	0.157669	-1.44664	0.147999	0.701435	331.038	314.048	287.213	263.331	tgs1	rRNA methyltransferase Tgs1	I	841572	842490	-
SPAC15A10.09c	404.316	0.206695	0.143096	1.44445	0.148613	0.703196	391.423	359.619	465.881	400.34	pun1	SUR7 family protein Pun1 (predicted)	I	3695162	3696028	-
SPBC776.05	576.892	-0.173694	0.120442	-1.44214	0.149264	0.705625	645.901	577.57	531.2	552.897	gpc1	glycerophosphocholine acyltransferase (GPCAT) Gpc1 (predicted)	II	3182005	3183521	+
SPAC16.01	399.473	0.203975	0.141778	1.43869	0.150237	0.708942	372.013	370.517	396.719	458.642	rho2	Rho family GTPase Rho2	I	4423002	4424176	+
SPCC1442.01	574.775	-0.387134	0.269159	-1.43831	0.150346	0.708942	772.062	531.008	500.462	495.567	ste6	Ras GEF Ste6	III	1766086	1768821	+
SPMIT.10	5.90056	-1.61423	1.1224	-1.43818	0.150382	0.708942	11.8613	5.94412	2.88174	2.9151	atp9	F1-FO ATP synthase subunit 9 (predicted)	MT	17808	18032	+
SPAC1705.03c	10228.5	0.0853394	0.0594037	1.4366	0.150832	0.710408	10013.1	9839.5	10996.7	10064.9	ecm33	extracellular leucine-rich repeat domain, receptor L domain-like Ecm33	I	1569995	1571260	-
SPBC1773.12	94.0747	0.393056	0.273847	1.43531	0.151199	0.710828	89.4988	73.3108	108.545	104.944	SPBC1773.12	DNA-binding transcription factor, zf-fungal binuclear cluster type (predicted)	II	308160	309944	+
SPBC839.17c	2553.7	-0.106616	0.0742565	-1.43578	0.151064	0.710828	2550.18	2745.19	2375.51	2543.91	fkh1	FKBP-type peptidyl-prolyl cis-trans isomerase Fkh1	II	631842	632642	-
SPAC1F12.10c	330.05	0.214968	0.150195	1.43126	0.152357	0.71365	300.845	310.085	341.966	367.303	SPAC1F12.10c	NADPH-hemoprotein reductase (predicted)	I	3820727	3821385	-
SPBC839.04	5193.68	0.0885395	0.0618292	1.432	0.152143	0.71365	4858.82	5209.03	5312.96	5393.91	rpl803	60S ribosomal protein L8/L2 (predicted)	II	601281	602042	+
SPBC16E9.09c	1774.82	-0.109449	0.0764072	-1.43244	0.152018	0.71365	1825.56	1858.53	1706.95	1708.25	erp5	COPII vesicle coat component Erp5/Erp6 (predicted)	II	1930512	1931324	-
SPCC1739.15	227.16	-0.258555	0.18062	-1.43149	0.152291	0.71365	265.262	229.839	202.682	210.859	wtf21	wtf element Wtf21	III	2064452	2065781	+
SPAC17A2.03c	1874.2	-0.109844	0.0767873	-1.4305	0.152574	0.713736	1906.43	1984.34	1842.39	1763.64	vma6	V-type ATPase V0 subunit d (predicted)	I	3555271	3556345	-
SPAC22H12.02	1107.1	-0.13004	0.0909233	-1.43022	0.152654	0.713736	1126.82	1186.84	1062.4	1052.35	tfg3	TFIID, TFIIF, Ino80, SWI/SNF, and NuA3 complex subunit Tfg3	I	895366	896401	+
SPAC3H8.09c	357.496	0.2135	0.149432	1.42874	0.153079	0.714401	335.351	326.926	414.01	353.699	nab3	poly(A) binding protein Nab3 (predicted)	I	604496	606849	-
SPCC1672.06c	969.529	-0.139032	0.0973432	-1.42827	0.153216	0.714401	1017.91	1014.46	881.811	963.926	asp1	diphosphoinositol pentakisphosphate kinase/InsP8 pyrophosphatase	III	571710	574472	-
SPMTR.02	16.1959	-0.934589	0.654174	-1.42866	0.153103	0.714401	23.7226	18.823	9.60579	12.6321	mat2-Pi	silenced P-specific trancription factor Pi	MTR	3889	4368	+
SPACUNK4.14	359.922	0.208618	0.146359	1.42539	0.154046	0.715617	315.942	351.694	374.626	397.425	mdb1	BRCT domain protein Mdb1	I	2883184	2885220	-
SPAC4D7.07c	432.569	0.189338	0.132875	1.42494	0.154176	0.715617	417.302	391.321	462.038	459.614	csi2	mitotic chromosome segregation protein Csi2	I	5361908	5363713	-
SPBC16G5.11c	488.489	0.184983	0.12979	1.42525	0.154085	0.715617	435.633	478.501	494.698	545.124	bag101	BAG family molecular chaperone regulator Bag101 (predicted)	II	4233197	4233784	-
SPBC19C7.10	2174.98	-0.103229	0.0724095	-1.42563	0.153976	0.715617	2280.6	2225.08	2067.17	2127.05	bqt4	bouquet formation protein Bqt4	II	2840857	2842411	+
SPAC6B12.03c	174.081	-0.300329	0.210623	-1.42591	0.153895	0.715617	208.112	176.342	171.944	139.925	bit2	HbrB family protein involved in TOR signaling Bit2 (predicted)	I	2414229	2415137	-
SPAPB1E7.02c	370.234	-0.201728	0.141654	-1.42409	0.154421	0.716107	397.892	394.293	351.572	337.18	mcl1	DNA polymerase alpha accessory factor Mcl1	I	3283195	3285745	-
SPAC1805.17	1159.17	-0.127841	0.089956	-1.42115	0.155273	0.719404	1216.32	1204.67	1072.97	1142.72	crm1	karyopherin/importin beta family nuclear export signal receptor Crm1	I	2804508	2807744	+
SPAC959.04c	424.12	-0.193012	0.136075	-1.41842	0.156067	0.722427	470.138	434.911	379.429	412.001	omh6	alpha-1,2-mannosyltransferase Omh6 (predicted)	I	3392886	3393949	-
SPBC359.05	590.982	0.167479	0.118228	1.41658	0.156606	0.722961	559.637	553.794	594.598	655.897	abc3	vacuolar heme ABC transmembrane exporter Abc3	II	122747	127144	+
SPAPYUG7.02c	810.762	0.144274	0.10183	1.41682	0.156536	0.722961	781.767	758.866	839.546	862.869	sin1	stress activated MAP kinase interacting protein Sin1	I	4746193	4748288	-
SPBC776.15c	2252.68	-0.106572	0.075188	-1.41741	0.156364	0.722961	2388.43	2283.53	2087.34	2251.43	kgd2	dihydrolipoamide S-succinyltransferase, e2 component of oxoglutarate dehydrogenase complex Kdg2 (predicted)	II	3206869	3208579	-
SPAC11E3.07	3281.9	-0.096696	0.0683126	-1.41549	0.156924	0.723123	3370.76	3412.91	3298.63	3045.31	vma4	V-type ATPase V1 subunit E (predicted)	I	5295021	5295704	+
SPBC1539.07c	1301.32	-0.133962	0.0946345	-1.41557	0.1569	0.723123	1259.45	1463.24	1267	1215.6	fmd1	glutathione-dependent formaldehyde dehydrogenase (predicted)	II	4373675	4375075	-
SPBC646.05c	2879.6	-0.0966571	0.0683854	-1.41342	0.157533	0.725277	3028.94	2923.52	2848.12	2717.84	erg9	farnesyldiphosphate:farnesyldiphosphatefarnesyltransferase (squalene synthase) Erg9	II	931060	932442	-
SPBP16F5.06	287.44	0.235476	0.166873	1.41111	0.158213	0.725835	283.593	244.7	288.174	333.293	nop8	ribosome biogenesis protein Nop8 (predicted)	II	1908132	1909568	+
SPAC6C3.09	580.273	0.17169	0.121751	1.41017	0.158489	0.725835	574.733	517.138	585.953	643.265	rpp40	RNase P and RNase MRP subunit Rpp40	I	2339884	2341141	+
SPAC29A4.04c	3013.26	0.0933182	0.0661328	1.41107	0.158223	0.725835	2867.2	2964.13	3112.28	3109.44	cbf5	pseudouridine synthase Cbf5 (predicted)	I	5140407	5141831	+
SPCPB16A4.03c	5727.33	-0.0828162	0.058652	-1.41199	0.157952	0.725835	5863.79	5919.35	5436.88	5689.3	ade10	bifunctional IMP cyclohydrolase/phosphoribosylaminoimidazolecarboxamideformyltransferase	III	947832	949589	-
SPBC12D12.03	2171.5	-0.108934	0.0772521	-1.41011	0.158506	0.725835	2205.12	2301.36	1993.2	2186.32	cct1	chaperonin-containing T-complex alpha subunit Cct1	II	2307436	2309436	+
SPBC2G2.13c	965.273	-0.137215	0.0973035	-1.41018	0.158487	0.725835	1001.74	1020.41	880.851	958.096	dcd1	deoxycytidylate deaminase (predicted)	II	3458998	3460234	-
SPCC1795.01c	343.876	-0.211678	0.150201	-1.4093	0.158747	0.72629	366.622	371.507	341.006	296.368	mad3	mitotic spindle checkpoint protein Mad3	III	997688	998620	+
SPAC20H4.01	614.44	0.16455	0.116895	1.40768	0.159227	0.726534	611.396	547.85	643.588	654.926	utp5	U3 snoRNP-associated protein Utp5 (predicted)	I	2111433	2113433	+
SPCC794.08	1220.71	0.123277	0.0875715	1.40773	0.159211	0.726534	1187.21	1150.19	1293.9	1251.55	efr3	phosphatidylinositol-4 kinase plasma membrane scaffold Efr3	III	265445	267881	+
SPAC23H4.18c	477.211	-0.177916	0.126384	-1.40774	0.159209	0.726534	508.957	504.259	443.787	451.84	rbx1	SCF complex, Cul4-RING and CLRC ubiquitin ligase ligase E3 subunit Rbx1	I	1575410	1576028	+
SPAC3H1.08c	404.717	-0.193436	0.137684	-1.40492	0.160045	0.729617	422.693	440.855	392.877	362.444	SPAC3H1.08c	mitochondrial calcium uniporter regulator (predicted)	I	1945426	1946101	-
SPBC1271.15c	600.487	-0.168947	0.120296	-1.40443	0.160192	0.729636	609.239	661.778	598.441	532.492	mti2	mitochondrial translation initiation factor IF-2Mt/Mti2	II	334388	336448	+
SPAC1002.16c	71.7027	0.446426	0.318224	1.40287	0.160657	0.730453	69.0111	52.5064	74.9252	90.3681	SPAC1002.16c	carboxylic acid transmembrane transporter (predicted)	I	1827871	1829370	-
SPAC17G6.04c	1021.36	-0.136061	0.0969789	-1.403	0.160618	0.730453	1100.94	1038.24	928.88	1017.37	cpp1	protein farnesyltransferase beta subunit Cpp1	I	3595197	3596345	-
SPAC20G8.01	405.446	0.194005	0.138468	1.40109	0.161189	0.730922	372.013	384.386	454.354	411.029	cdc17	ATP-dependent DNA replication ligase Cdc17	I	1387944	1390352	+
SPCC1672.03c	2015.05	0.104606	0.0746341	1.40158	0.161041	0.730922	1960.35	1923.91	2135.37	2040.57	gud1	guanine deaminase Gud1 (predicted)	III	565891	567474	-
SPAC18G6.13	118.146	-0.339852	0.24256	-1.4011	0.161183	0.730922	127.239	136.715	108.545	100.085	SPAC18G6.13	Schizosaccharomyces specific protein	I	2241013	2241357	+
SPAC22A12.11	7796.67	-0.0771872	0.0551388	-1.39987	0.161552	0.731922	7895.31	8114.71	7665.42	7511.24	dak1	dihydroxyacetone kinase Dak1	I	1177065	1178807	+
SPCC1672.11c	887.47	0.15206	0.108883	1.39654	0.162551	0.735391	844.308	837.13	851.073	1017.37	SPCC1672.11c	P-type ATPase P5 type (predicted)	III	585906	589853	-
SPCC4G3.08	1358.91	0.12019	0.0860734	1.39636	0.162605	0.735391	1278.86	1325.54	1367.86	1463.38	psk1	ribosomal protein S6 kinase Psk1	III	458100	459410	-
SPAPB8E5.06c	4558.24	0.0869729	0.0623082	1.39585	0.162759	0.735436	4294.87	4546.26	4752.94	4638.9	rpl302	60S ribosomal protein L3	I	4917825	4918991	-
SPAC1952.10c	155.249	0.302337	0.216928	1.39372	0.163403	0.735998	128.318	149.594	161.377	181.708	SPAC1952.10c	conserved fungal multispanning membrane protein	I	4985094	4986294	-
SPBC83.06c	473.303	0.184778	0.132532	1.39421	0.163253	0.735998	430.241	455.716	537.924	469.331	SPBC83.06c	mitochondrial ribosomal protein subunit L36, Rtc6 (predicted)	II	1520212	1520490	-
SPAC10F6.03c	1393.48	0.115509	0.0828436	1.3943	0.163228	0.735998	1350.03	1325.54	1447.59	1450.75	cts1	CTP synthase Cts1 (predicted)	I	1211446	1213468	-
SPAPB2B4.03	527.099	-0.184016	0.13205	-1.39353	0.163459	0.735998	613.552	508.222	473.565	513.058	cig2	G1/S-specific B-type cyclin Cig2	I	2711080	2712315	+
SPBC29A10.13	1708.69	-0.107901	0.0774736	-1.39275	0.163697	0.736419	1759.78	1785.22	1629.14	1660.64	atp7	F1-FO ATP synthase subunit D (predicted)	II	2567701	2568228	+
SPAC212.06c	12.5628	1.0353	0.745743	1.38828	0.165052	0.739348	7.54809	8.91618	19.2116	14.5755	SPAC212.06c	DNA helicase in rearranged telomeric region, truncated	I	18072	18557	+
SPAC8C9.07	430.838	0.194291	0.140149	1.38632	0.165649	0.739348	421.615	382.405	494.698	424.633	fyv7	rRNA processing protein Fyv7 (predicted)	I	3654280	3654714	+
SPCC126.09	1346.7	0.135439	0.0975376	1.38858	0.164961	0.739348	1375.91	1191.8	1326.56	1492.53	zip2	vacuolar zinc exporter, ZIP family, Zip2 (predicted)	III	2131761	2133458	+
SPAC890.07c	1330.71	0.11805	0.0849401	1.3898	0.164588	0.739348	1288.57	1264.12	1357.3	1412.85	rmt1	type I protein arginine N-methyltransferase Rmt1	I	5016020	5017829	-
SPBC1773.07c	2344.76	0.0979625	0.0706212	1.38715	0.165395	0.739348	2281.68	2248.86	2457.16	2391.35	sbp1	Ran GTPase binding protein Sbp1	II	296236	297153	-
SPAC17H9.14c	3793.07	-0.0930993	0.0671008	-1.38745	0.165303	0.739348	3843.06	3987.51	3816.38	3525.33	pdi2	ER protein disulfide isomerase Pdi2	I	2029229	2030308	-
SPAPB1A10.10c	1167.13	-0.123455	0.0888744	-1.38909	0.164804	0.739348	1191.52	1242.32	1109.47	1125.23	ypt71	GTPase Ypt71	I	1880879	1881910	-
SPCC1442.07c	525.397	-0.171556	0.123729	-1.38654	0.165583	0.739348	542.384	570.635	473.565	515.001	wss2	ubiquitin/metalloprotease fusion protein Udp7	III	1779612	1780460	-
SPAC1A6.06c	82.9933	-0.401538	0.289254	-1.38819	0.165081	0.739348	93.812	95.1059	65.3194	77.736	meu31	Schizosaccharomyces specific protein Meu31	I	1082783	1083391	-
SPAC30D11.11	1266.2	0.118756	0.0857704	1.38458	0.166182	0.740004	1206.62	1221.52	1305.43	1331.23	izh3	ER membrane Haemolysin-III family protein involved in zinc homeostasis Izh3 (predicted)	I	1098036	1099364	-
SPAC56E4.06c	664.111	-0.155816	0.112526	-1.38471	0.16614	0.740004	695.503	704.378	657.997	598.567	ggt2	gamma-glutamyltranspeptidase Ggt2	I	1256566	1258401	-
SPBPJ4664.02	373.121	-0.209045	0.150998	-1.38442	0.16623	0.740004	425.928	374.479	316.03	376.048	SPBPJ4664.02	crazy cell surface glycoprotein	II	687716	699631	+
SPAC23G3.04	198.052	0.26139	0.189057	1.3826	0.166788	0.74059	178.998	181.296	210.367	221.548	ies4	Ino80 complex subunit Ies4	I	873167	873751	+
SPBC17D11.04c	800.04	0.140827	0.101806	1.38328	0.166578	0.74059	760.201	761.838	839.546	838.577	nto1	histone acetyltransferase complex PHD finger subunit Nto1 (predicted)	II	3310577	3312880	-
SPAC3C7.03c	298.713	-0.217872	0.157585	-1.38257	0.166796	0.74059	309.472	332.871	285.292	267.217	rad55	RecA family ATPase Rad55/Rhp55	I	2066668	2067764	-
SPBC29A3.16	285.917	0.221209	0.160133	1.38141	0.167153	0.741467	269.575	258.569	297.779	317.746	rrs1	ribosome biogenesis protein Rrs1	II	2068393	2068893	+
SPAC17A5.01	382.87	-0.199642	0.144565	-1.38099	0.167283	0.741467	420.537	398.256	382.31	330.378	pex6	peroxin-6 (predicted)	I	1750093	1752993	+
SPAC1805.18	283.662	0.220782	0.159994	1.37994	0.167606	0.742255	268.496	255.597	307.385	303.17	pop6	RNase P and RNase MRP subunit Pop6/Pop7 ortholog	I	2789090	2789377	+
SPAC3A12.13c	1124.41	-0.123439	0.0895051	-1.37912	0.167857	0.742722	1183.97	1161.08	1069.12	1083.45	tif310	translation initiation factor eIF3j (p35)	I	1442261	1443128	-
SPCC11E10.09c	122.631	-0.329073	0.238703	-1.37858	0.168023	0.742816	143.414	129.78	112.388	104.944	SPCC11E10.09c	alpha-amylase homolog (predicted)	III	1471781	1473326	-
SPBC1778.08c	1541.37	-0.115547	0.0838972	-1.37725	0.168435	0.743712	1533.34	1672.28	1504.27	1455.61	arc3	ARP2/3 actin-organizing complex subunit Arc21	II	3111458	3112204	-
SPCC4G3.14	712.994	-0.15813	0.114838	-1.37699	0.168516	0.743712	705.208	798.493	709.868	638.407	mdj1	mitochondrial DNAJ domain protein Mdj1 (predicted)	III	443170	444756	-
SPBC32F12.16	134.39	-0.313535	0.227834	-1.37616	0.168773	0.744201	155.275	142.659	117.191	122.434	gem7	SMN complex Gem7	II	2788470	2788745	+
SPCPB1C11.01	419.302	-0.189356	0.137663	-1.3755	0.168976	0.744453	436.711	456.706	367.902	415.888	amt1	plasma membrane ammonium transmembrane transporter Amt1	III	2069806	2071299	+
SPBP23A10.15c	6331.84	0.0792414	0.0577181	1.3729	0.169782	0.747362	6063.28	6252.22	6393.61	6618.25	qcr1	mitochondrial processing peptidase (MPP) complex beta subunit Mas1 (predicted)	II	2033470	2034843	-
SPBC28F2.02	1263.66	0.125176	0.0912486	1.37182	0.170121	0.74821	1228.18	1189.81	1390.92	1245.72	mep33	translation machinery associated protein Mep33	II	1574527	1575405	+
SPBC17G9.13c	194.077	0.261185	0.190782	1.36902	0.170992	0.749654	175.763	177.333	206.524	216.689	SPBC17G9.13c	mitochondrial conserved fungal protein	II	2196584	2197537	-
SPBC336.02	250.393	0.238256	0.174038	1.36899	0.171003	0.749654	244.774	214.979	285.292	256.529	cdh1	18S rRNA dimethylase Cdh1 (predicted)	II	2736963	2737944	+
SPBC31F10.03	1416.22	-0.114464	0.0836181	-1.36888	0.171036	0.749654	1468.64	1476.12	1397.64	1322.48	ggg1	glutathione-specific gamma-glutamylcyclotransferase Ggg1 (predicted)	II	3756657	3757268	+
SPBC409.06	933.686	-0.134993	0.0985176	-1.37024	0.170611	0.749654	1016.84	938.18	876.048	903.681	uch2	ubiquitin C-terminal hydrolase Uch2	II	1142220	1143273	+
SPAC644.10	235.849	-0.253619	0.185662	-1.36603	0.17193	0.75293	281.436	231.821	195.958	234.18	med11	mediator complex subunit Med11	I	2691464	2691874	+
SPAC27D7.12c	64.4011	0.472588	0.346234	1.36494	0.172272	0.753137	61.463	46.5623	89.3338	60.2454	but1	thioredoxin family protein But1	I	4533517	4534248	-
SPBC11G11.03	1038.92	0.131212	0.0961033	1.36532	0.172152	0.753137	1043.79	940.161	1093.14	1078.59	mrt4	mRNA turnover and ribosome assembly protein Mrt4 (predicted)	II	1760732	1761792	+
SPAC10F6.14c	811.811	-0.138208	0.101374	-1.36335	0.172771	0.754032	858.326	843.074	766.542	779.303	SPAC10F6.14c	mitochondrial ABC1 kinase family protein, human ADCK5 ortholog, unknown role (predicted)	I	1232316	1233923	-
SPBC1734.08	815.434	-0.145034	0.106345	-1.36382	0.172625	0.754032	810.881	901.525	801.123	748.209	hse1	STAM like protein Hse1	II	1074399	1075795	+
SPAC9.07c	1216.07	0.118859	0.0873621	1.36053	0.173661	0.75412	1155.94	1175.94	1245.87	1286.53	SPAC9.07c	GTPase Obg family, involved in cytoplasmic translation Rbg1 (predicted)	I	1474909	1476107	-
SPBC365.12c	4606.97	0.081564	0.0599726	1.36002	0.173824	0.75412	4536.4	4417.47	4705.88	4768.13	ish1	nuclear envelope LEA domain protein Ish1	II	2516249	2518303	-
SPBC428.03c	4911.97	-0.095188	0.0699818	-1.36018	0.173772	0.75412	4769.32	5377.45	4631.91	4869.19	pho4	thiamine-repressible acid phosphatase Pho4	II	445417	446808	-
SPAC25H1.06	638.485	-0.152764	0.112289	-1.36046	0.173685	0.75412	672.859	671.685	619.573	589.822	pcf3	CAF assembly factor (CAF-1) complex subunit C, Pcf3	I	2531453	2532679	+
SPAC1687.02	248.517	-0.247502	0.18164	-1.3626	0.17301	0.75412	290.062	249.653	202.682	251.67	rce1	CAAX prenyl protease (predicted)	I	904266	905132	+
SPAC664.13	160.757	-0.286478	0.210603	-1.36027	0.173744	0.75412	164.98	188.23	146.008	143.812	SPAC664.13	Schizosaccharomyces pombe specific protein	I	1729505	1729858	+
SPAC22F3.12c	1626.32	-0.507346	0.372819	-1.36084	0.173565	0.75412	2399.22	1419.65	1289.1	1397.3	rgs1	regulator of G-protein signaling Rgs1	I	680176	681621	+
SPCC4B3.07	1642.43	0.107344	0.0789569	1.35953	0.173978	0.75415	1564.61	1597.98	1730.96	1676.18	nro1	negative regulator of Ofd1, Nro1	III	1162869	1164050	-
SPAC821.04c	673.974	0.148495	0.109271	1.35897	0.174157	0.754289	642.666	636.021	714.671	702.539	cid13	poly(A) polymerase Cid13	I	985011	986747	-
SPBP35G2.09	199.144	-0.260189	0.191566	-1.35822	0.174394	0.754672	222.13	212.007	168.101	194.34	usp103	U1 snRNP-associated protein Usp103	II	981240	981893	+
SPCC895.06	635.222	0.159111	0.11739	1.3554	0.17529	0.75791	594.143	606.3	714.671	625.775	elp2	elongator complex WD repeat protein Elp2 (predicted)	III	1008473	1010876	+
SPAC12B10.05	740.739	0.167023	0.123309	1.3545	0.175576	0.758507	706.286	689.518	688.735	878.417	icp55	mitochondrial intermediate cleavage peptidase Icp55 (predicted)	I	4582378	4584333	+
SPBC646.10c	1876.75	0.101577	0.0750517	1.35343	0.175919	0.759348	1796.45	1824.84	1939.41	1946.31	nop56	U3 snoRNP protein Nop56 (predicted)	II	940825	942318	-
SPBC1921.03c	243.616	0.237124	0.175283	1.3528	0.176119	0.75957	211.347	235.783	277.607	249.727	mex67	mRNA export receptor, Tap, nucleoporin Mex67	II	2408304	2410094	-
SPBC23G7.16	1342.76	-0.125194	0.0925981	-1.35201	0.176371	0.760016	1299.35	1501.88	1289.1	1280.7	ctr6	vacuolar copper exporter Ctr6	II	2100273	2101061	+
SPAC926.07c	331.359	0.202777	0.15024	1.34969	0.177116	0.76194	304.08	312.066	340.045	369.246	dlc2	dynein light chain Dlc2 (predicted)	I	3896632	3897128	-
SPCC1322.11	4727.69	0.0860275	0.0637335	1.3498	0.17708	0.76194	4412.4	4760.25	4806.74	4931.38	rpl2302	60S ribosomal protein L23	III	1311652	1312336	+
SPBC32F12.06	653.768	0.157652	0.117376	1.34314	0.179226	0.76274	662.076	574.598	709.868	668.53	pch1	P-TEFB associated cyclin, cyclin T Pch1	II	2794966	2796094	+
SPCC970.10c	867.32	0.140462	0.104215	1.3478	0.177723	0.76274	868.031	782.642	875.087	943.521	brl2	ubiquitin-protein ligase E3 Brl2	III	490068	492174	+
SPAC1805.05	1585.88	0.107701	0.0802083	1.34276	0.179349	0.76274	1538.73	1514.76	1608.97	1681.04	cki3	serine/threonine protein kinase Cki3	I	2781416	2782934	+
SPCC18.14c	11239.5	0.0699504	0.0520992	1.34264	0.179389	0.76274	11092.5	10842.1	11498.1	11525.3	rpp0	60S acidic ribosomal protein Rpp0 (predicted)	III	1980629	1981891	-
SPBC1734.13	3104.14	-0.09105	0.0677101	-1.3447	0.178721	0.76274	3303.91	3100.85	3029.67	2982.15	atp3	F1-FO ATP synthase gamma subunit (predicted)	II	1085936	1086920	+
SPAC6F12.04	1990.04	-0.103825	0.0771839	-1.34516	0.178573	0.76274	2101.6	2021.99	1988.4	1848.17	tvp15	COPI-coated vesicle associated protein (predicted)	I	1316099	1316497	+
SPBP8B7.24c	940.256	-0.13128	0.0977738	-1.34269	0.179372	0.76274	1009.29	957.003	923.116	871.615	atg8	autophagy associated protein Atg8	II	3684653	3685265	-
SPBC4C3.06	866.087	-0.134062	0.0996191	-1.34575	0.178383	0.76274	897.145	915.394	846.27	805.539	syp1	F-BAR domain protein Syp1 (predicted)	II	3124204	3126701	-
SPBC30D10.02	845.039	-0.142002	0.105741	-1.34293	0.179294	0.76274	943.512	830.195	819.374	787.077	ncb2	transcription regulator Ncb2 (predicted)	II	3093811	3094335	-
SPBC365.06	481.925	-0.173169	0.12845	-1.34815	0.177611	0.76274	487.391	533.98	442.827	463.501	pmt3	ubiquitin-like protein modifier SUMO	II	2506894	2507390	+
SPBC4.05	492.268	-0.174079	0.129237	-1.34698	0.177988	0.76274	520.818	523.082	493.738	431.435	mlo2	ubiquitin protein ligase E3 component human N-recognin 7 homolog Mlo2	II	1194354	1195343	+
SPAC22H10.10	370.722	-0.210145	0.156362	-1.34397	0.178958	0.76274	441.024	354.666	317.952	369.246	alp21	tubulin specific chaperone cofactor E	I	2390086	2391790	+
SPAC4H3.04c	328.986	-0.22719	0.168615	-1.34739	0.177856	0.76274	359.074	350.703	350.611	255.557	SPAC4H3.04c	MEMO1 family, human MEMO1 ortholog, ancient conserved protein, in some organisms this domain is present with ammecr1 which interacts with mediator complex and is implicated in transcription, implicated in signalling and localization to the plasma membrane	I	3831070	3832149	-
SPBC32H8.08c	256.177	-0.249832	0.185674	-1.34555	0.178449	0.76274	319.177	237.765	219.012	248.755	omh5	alpha-1,2-mannosyltransferase Omh5 (predicted)	II	1465811	1467431	-
SPBC21B10.09	603.046	-0.154082	0.114842	-1.34169	0.179697	0.763416	625.413	644.937	580.19	561.643	SPBC21B10.09	endomembrane system acetyl-CoA transmembrane transporter (predicted)	II	1652519	1654275	-
SPAC24B11.10c	391.477	0.187201	0.139667	1.34034	0.180136	0.764643	352.604	379.433	406.325	427.548	cfh1	SEL1/TPR repeat protein Cfh1 (predicted)	I	218657	221455	-
SPAC6G9.04	325.129	0.201148	0.150126	1.33986	0.18029	0.764662	300.845	304.141	353.493	342.038	spo7	Arf GEF Spo7	I	3248598	3252554	+
SPCC1902.01	705.627	-0.160164	0.119592	-1.33925	0.180491	0.764881	749.418	740.043	598.441	734.605	gaf1	DNA-binding transcription factor Gaf1	III	1666310	1668877	-
SPBC12C2.10c	540.237	0.17008	0.127223	1.33686	0.181268	0.767294	489.548	527.045	530.24	614.114	pst1	Clr6 histone deacetylase complex subunit Pst1	II	2452052	2456757	+
SPCC338.12	2002.14	-0.114709	0.0858226	-1.33658	0.18136	0.767294	1975.44	2187.44	2041.23	1804.45	pbi2	vaculoar proteinase B inhibitor Pbi2	III	1355276	1355509	-
SPBC337.04	295.947	0.229684	0.172056	1.33494	0.181896	0.768287	310.55	234.793	332.36	306.085	ppk27	calcium/calmodulin-dependent protein kinase Ppk27 (predicted)	II	1037077	1038385	+
SPCC737.03c	533.239	0.170928	0.128007	1.3353	0.181779	0.768287	482	521.101	523.516	606.341	ima1	inner nuclear membrane protein Ima1	III	1888625	1890472	-
SPBC13G1.01c	549.662	0.16364	0.123036	1.33002	0.183512	0.769362	551.011	486.427	584.993	576.218	nam9	mitochondrial ribosomal protein subunit S4 (predicted)	II	3728252	3729288	-
SPBC713.08	946.694	0.132456	0.0995146	1.33102	0.183182	0.769362	924.102	882.701	1037.43	942.549	tom13	mitochondrial TOM complex assembly protein Tom13 (predicted)	II	882460	882675	+
SPBC16E9.13	2357.85	0.0946604	0.0710189	1.33289	0.182567	0.769362	2251.49	2309.29	2393.76	2476.86	ksp1	serine/threonine protein kinase Ksp1 (predicted)	II	1943227	1944651	+
SPBC119.01	1731.93	-0.10459	0.0786194	-1.33033	0.18341	0.769362	1794.29	1795.12	1718.48	1619.82	rpn3	19S proteasome regulatory subunit Rpn3	II	712512	714095	+
SPBC19G7.17	869.962	-0.13997	0.105219	-1.33027	0.18343	0.769362	851.856	971.863	808.807	847.322	sec6102	translocon subunit Sec61 homolog (predicted)	II	2382465	2384277	+
SPBC56F2.06	1135.18	-0.146528	0.110081	-1.33109	0.183158	0.769362	1222.79	1163.07	1206.49	948.379	mug147	Schizosaccharomyces specific protein Mug147	II	4104214	4105449	-
SPACUNK4.08	453.947	-0.185166	0.1392	-1.33022	0.183445	0.769362	531.601	434.911	418.812	430.463	dpp2	dipeptidyl peptidase (predicted)	I	2895219	2897600	-
SPAC8E11.03c	378.562	-0.189709	0.142384	-1.33238	0.182736	0.769362	407.597	399.247	335.242	372.161	dmc1	RecA family ATPase Dmc1	I	3382332	3383404	+
SPAC17G8.10c	417.249	-0.190488	0.143268	-1.32959	0.183654	0.769362	464.747	425.004	424.576	354.67	dma1	mitotic spindle checkpoint ubiquitin ligase Dma1	I	2358570	2359373	-
SPAC2G11.08c	151.874	-0.289167	0.216938	-1.33295	0.18255	0.769362	174.684	159.5	145.047	128.264	smn1	SMN family protein Smn1	I	822332	822849	-
SPAC212.01c	2.93816	2.22739	1.67628	1.32877	0.183923	0.769857	1.0783	0.990686	2.88174	6.8019	SPAC212.01c	S. pombe specific DUF999 family protein 2	I	28738	29638	+
SPBC106.14c	253.421	0.229145	0.172611	1.32752	0.184338	0.770963	231.834	234.793	252.632	294.425	sda1	SDA1 family protein (predicted)	II	404262	406421	-
SPBC28E12.03	773.576	0.140931	0.106317	1.32558	0.18498	0.772384	765.592	706.359	788.635	833.718	rga4	RhoGAP, GTPase activating protein Rga4	II	1839623	1842766	+
SPCC1259.04	329.81	-0.205196	0.154781	-1.32572	0.184934	0.772384	382.796	323.954	308.346	304.142	iec3	Ino80 complex subunit Iec3	III	1041374	1041934	+
SPAC343.14c	732.805	0.147958	0.111728	1.32428	0.185411	0.773545	718.147	672.676	817.453	722.945	tif222	translation initiation factor eIF2B beta subunit	I	1672376	1673655	-
SPBC2D10.11c	1904.45	-0.105223	0.0795112	-1.32337	0.185711	0.773545	1907.51	2039.82	1900.99	1769.47	nap2	histone H2A-H2B chaperone Nap2	II	2984709	2985848	-
SPCC1020.01c	175.286	-0.268804	0.203101	-1.3235	0.18567	0.773545	205.955	177.333	158.496	159.359	pma2	P-type proton ATPase, P3-type Pma2	III	793179	796211	+
SPBC1685.16	501.742	0.168657	0.12753	1.32249	0.186004	0.774135	472.295	472.557	499.501	562.614	vma9	V-type ATPase V0 subunit e (predicted)	II	501305	501862	+
SPCC569.02c	11.9034	1.02765	0.778135	1.32066	0.186615	0.774246	10.783	4.95343	16.3298	15.5472	SPCC569.02c	S. pombe specific UPF0321 family protein 2	III	2432612	2432953	+
SPBC409.14c	372.793	0.187513	0.141925	1.32121	0.186431	0.774246	336.429	360.61	397.68	396.454	mrps17	mitochondrial ribosomal protein subunit S17 (predicted)	II	1166932	1167204	-
SPAC31A2.04c	1612.74	-0.10641	0.0806047	-1.32014	0.186788	0.774246	1682.15	1662.37	1601.29	1505.16	pre1	20S proteasome complex subunit beta 4 Pre1	I	390589	391173	-
SPBC83.01	1519.64	-0.106422	0.0805295	-1.32152	0.186328	0.774246	1558.14	1593.02	1456.24	1471.15	ucp8	UBA/EH/EF hand domain protein Ucp8	II	1510581	1513363	+
SPBC428.13c	261.391	-0.232042	0.175721	-1.32051	0.186665	0.774246	281.436	283.336	268.962	211.831	mob1	Sid2-Mob1 kinase complex regulatory subunit Mob1	II	469388	470125	-
SPBC21B10.11	163.692	0.280454	0.212779	1.31805	0.187487	0.775386	138.022	157.519	194.037	165.189	dpm2	dolichol-phosphate mannosyltransferase regulatory subunit Dpm2 (predicted)	II	1650289	1650550	-
SPAC14C4.11	2382.95	-0.0960932	0.0729357	-1.31751	0.187669	0.775386	2408.92	2515.35	2373.59	2233.94	vtc2	vacuolar transporter chaperone (VTC) complex polyphosphate synthetase subunit Vtc2/3 (predicted)	I	5247756	5250167	+
SPBC725.03	1397.52	-0.136318	0.103451	-1.3177	0.187603	0.775386	1497.76	1429.56	1483.13	1179.64	SPBC725.03	pyridoxamine 5'-phosphate oxidase (predicted)	II	1207040	1207813	+
SPCC757.02c	111.992	-0.35717	0.270906	-1.31843	0.18736	0.775386	133.709	117.892	76.8463	119.519	SPCC757.02c	dehydrogenase (predicted)	III	45695	46912	-
SPAC1A6.11	4.39964	1.72736	1.32116	1.30745	0.191058	0.775403	1.0783	2.97206	4.80289	8.7453	SPAC1A6.11	dubious	I	1073534	1073854	+
SPAC977.04	5.45258	1.63378	1.25166	1.30529	0.191793	0.775403	5.3915	0	8.64521	7.7736	SPAC977.04	truncated C terminal region of membrane transporter	I	34349	34816	+
SPAC227.01c	95.2421	0.351487	0.268779	1.30771	0.19097	0.775403	85.1856	82.227	102.782	110.774	erd1	Erd1 homolog (predicted)	I	499284	500405	-
SPCC622.06c	139.1	0.292884	0.223914	1.30802	0.190866	0.775403	127.239	122.845	147.929	158.387	SPCC622.06c	dubious	III	1408816	1409184	-
SPAC4F8.04	259.57	0.219523	0.167083	1.31385	0.188895	0.775403	248.009	231.821	275.686	282.765	SPAC4F8.04	Brix domain protein Rpf1 (predicted)	I	2670529	2671449	-
SPAC343.15	301.921	0.211351	0.160735	1.3149	0.188543	0.775403	280.358	279.374	350.611	297.34	tit1	tRNA isopentenyltransferase Tit1	I	1673947	1675251	+
SPAC630.04c	439.226	0.196786	0.150589	1.30677	0.19129	0.775403	350.447	467.604	487.014	451.84	SPAC630.04c	Schizosaccharomyces specific protein	I	352427	352927	-
SPBC23G7.08c	367.762	0.18976	0.145082	1.30795	0.190891	0.775403	350.447	336.833	369.823	413.944	rga7	RhoGAP, GTPase activating protein Rga7	II	2110807	2112894	-
SPCC5E4.06	443.606	0.175896	0.133857	1.31406	0.188826	0.775403	414.067	419.06	443.787	497.51	smc6	Smc5-6 complex SMC P-loop ATPase subunit Smc6	III	652783	656311	+
SPAC22F8.07c	547.641	0.171095	0.130954	1.30653	0.191372	0.775403	540.228	490.39	526.397	633.548	rtf1	DNA replication termination factor Rtf1	I	4797267	4798928	-
SPCC16A11.02	527.18	0.164906	0.125414	1.31489	0.188548	0.775403	464.747	529.026	552.333	562.614	utp13	U3 snoRNP-associated protein Utp13 (predicted)	III	869701	872071	+
SPAC4A8.03c	570.658	0.154933	0.118015	1.31282	0.189242	0.775403	525.132	554.784	609.007	593.709	ptc4	protein phosphatase 2C Ptc4	I	2541287	2542438	-
SPBC1778.03c	603.485	0.151075	0.11573	1.3054	0.191756	0.775403	553.167	590.449	644.548	625.775	SPBC1778.03c	NADH pyrophosphatase (predicted)	II	3100855	3102165	-
SPBC14F5.10c	719.926	0.147193	0.112875	1.30404	0.192221	0.775403	673.937	692.49	809.768	703.511	SPBC14F5.10c	ubiquitin-protein ligase E3, unknown biological role, implicated in protein catabolic process (predicted)	II	4176252	4177712	-
SPBC1539.09c	1926.63	0.0987895	0.0751141	1.31519	0.188445	0.775403	1829.87	1891.22	1972.07	2013.36	trp1	anthranilate synthase component II, multifunctional enzyme Trp1	II	4377221	4379500	-
SPBC3F6.03	2861.92	-0.0898093	0.0685345	-1.31042	0.190052	0.775403	2863.96	3037.44	2784.72	2761.57	trr1	thioredoxin reductase Trr1	II	4189967	4191234	+
SPBC23G7.12c	2485.65	-0.0914526	0.0701071	-1.30447	0.192073	0.775403	2507.05	2621.36	2400.49	2413.7	rpt6	19S proteasome base subcomplex ATPase subunit Rpt6	II	2121530	2122783	-
SPAC56E4.04c	4459.97	-0.0950989	0.0727815	-1.30664	0.191337	0.775403	4676.58	4537.34	4012.34	4613.63	cut6	acetyl-CoA/biotin carboxylase	I	1246095	1253559	-
SPAPJ696.01c	1303.97	-0.117464	0.0896638	-1.31004	0.190181	0.775403	1388.85	1325.54	1312.15	1189.36	vps17	retromer complex subunit Vps17	I	721617	723425	-
SPBC14F5.11c	1029.43	-0.122529	0.0932244	-1.31434	0.188732	0.775403	1051.34	1094.71	999.963	971.7	snx41	PX domain sorting nexin Snx41	II	4178610	4180488	-
SPBC336.12c	575.124	-0.156048	0.119182	-1.30932	0.190425	0.775403	635.118	577.57	546.569	541.237	cdc10	DNA-binding transcription factor, MBF transcription factor complex subunit Cdc10	II	2761287	2763590	-
SPAC644.13c	451.208	-0.173311	0.132337	-1.30962	0.190324	0.775403	497.096	459.678	439.945	408.114	SPAC644.13c	Rab GTPase binding (predicted)	I	2697418	2698095	-
SPBC1709.04c	369.037	-0.188098	0.143415	-1.31156	0.189668	0.775403	410.832	375.47	341.006	348.84	cyp3	cyclophilin family peptidyl-prolyl cis-trans isomerase Cyp3	II	1103770	1104607	-
SPCC330.10	339.805	-0.196093	0.149437	-1.31221	0.189448	0.775403	346.134	379.433	326.597	307.057	pcm1	P-TEFb-cap methyltransferase Pcm1	III	129931	131013	+
SPBC29A3.21	341.626	-0.196396	0.150555	-1.30447	0.192072	0.775403	359.074	370.517	296.819	340.095	SPBC29A3.21	Schizosaccharomyces pombe specific protein	II	2037092	2037394	+
SPAC1610.01	282.109	-0.212607	0.161897	-1.31323	0.189107	0.775403	296.532	309.094	248.79	274.019	saf5	splicing factor Saf5	I	1790625	1791278	+
SPAC1D4.11c	264.646	-0.215625	0.164724	-1.30901	0.190532	0.775403	281.436	287.299	242.066	247.783	lkh1	dual specificity protein kinase Lkh1	I	656760	658832	-
SPAC11H11.01	264.386	-0.217449	0.165702	-1.31229	0.189422	0.775403	292.219	276.401	238.224	250.699	sst6	ESCRT I complex subunit Vps23	I	4775838	4777340	+
SPAC19G12.13c	249.779	-0.223317	0.171115	-1.30507	0.191869	0.775403	270.653	267.485	218.051	242.925	poz1	shelterin complex subunit Poz1	I	4069876	4070756	-
SPCC13B11.03c	51.9913	-0.477549	0.366121	-1.30435	0.192115	0.775403	63.6196	57.4598	48.9895	37.8963	SPCC13B11.03c	hydroxyacylglutathione hydrolase (predicted)	III	1595042	1596061	-
SPAC23H3.13c	660.5	0.149735	0.114913	1.30303	0.192566	0.775798	610.317	641.965	655.115	734.605	gpa2	heterotrimeric G protein alpha-2 subunit Gpa2	I	2516846	2518315	-
SPBC800.06	635.407	0.149621	0.11484	1.30286	0.192622	0.775798	572.577	632.058	677.208	659.784	brx1	ribosome biogenesis protein Brx1 (predicted)	II	262763	263650	+
SPAC2F7.07c	699.665	0.140393	0.107819	1.30211	0.192879	0.775803	654.528	676.639	735.803	731.69	cph2	Clr6 histone deacetylase associated PHD-finger protein Cph2	I	544417	546240	-
SPBC18H10.03	3142.09	0.0845852	0.0649671	1.30197	0.192927	0.775803	3079.62	3020.6	3229.47	3238.68	tif307	translation initiation factor eIF3g	II	1773023	1773912	+
SPCC569.01c	671.42	-0.145161	0.111625	-1.30044	0.193451	0.7773	730.008	680.601	654.154	620.916	SPCC569.01c	DUF1773 family protein	III	2434691	2435662	+
SPCC63.03	100.124	0.346477	0.266588	1.29968	0.193712	0.777553	84.1073	92.1338	101.821	122.434	SPCC63.03	mitochondrial MIB complex subunit, human DNAJC11 ortholog (predicted)	III	837605	839657	+
SPAC19B12.01	283.459	0.213369	0.164546	1.29671	0.19473	0.777553	254.479	270.457	282.41	326.491	SPAC19B12.01	TPR repeat protein, human TTC27 ortholog	I	4875575	4878028	+
SPAC57A7.06	425.56	0.179611	0.138304	1.29867	0.194055	0.777553	369.857	427.976	440.906	463.501	utp14	U3 snoRNP protein Utp14 (predicted)	I	1531313	1534148	-
SPAC57A10.02	748.088	0.136755	0.105254	1.29928	0.193846	0.777553	701.973	723.201	770.384	796.794	cdr2	serine/threonine protein kinase Cdr2	I	1364846	1367173	+
SPBC365.14c	2144.95	-0.0932744	0.0719169	-1.29697	0.19464	0.777553	2208.36	2220.13	2080.61	2070.69	uge1	UDP-glucose 4-epimerase Uge1	II	2521623	2522925	-
SPAC17C9.13c	681.934	-0.146304	0.112695	-1.29823	0.194209	0.777553	753.731	679.611	663.76	630.633	cut8	tethering factor for nuclear proteasome Cut8	I	4477850	4478638	+
SPBC947.10	568.5	-0.157055	0.121021	-1.29775	0.194372	0.777553	570.42	628.095	519.673	555.812	dsc1	Golgi Dsc E3 ligase complex subunit Dsc1	II	653091	655246	-
SPCPB1C11.03	558.324	-0.170707	0.131594	-1.29722	0.194556	0.777553	580.125	602.337	466.841	583.992	SPCPB1C11.03	cysteine transmembrane transporter (predicted)	III	2077083	2078795	+
SPMIT.01	12.8408	0.946549	0.730753	1.29531	0.195214	0.778878	8.62639	8.91618	16.3298	17.4906	cox1	cytochrome c oxidase subunit 1	MT	4885	8792	+
SPAC2G11.12	507.744	0.162968	0.125985	1.29355	0.195821	0.779235	491.704	466.613	511.989	560.671	rqh1	RecQ type DNA helicase Rqh1	I	832027	836013	+
SPBC3H7.01	1122.44	0.123655	0.0956136	1.29328	0.195913	0.779235	1029.78	1118.48	1115.23	1226.29	spo14	GDP/GTP exchange factor, WD repeat protein Spo14	II	1890164	1891656	-
SPAC1783.07c	2480.97	-0.101743	0.0786486	-1.29364	0.195789	0.779235	2471.46	2664.95	2525.36	2262.12	pap1	DNA-binding transcription factor Pap1/Caf3	I	2200589	2202247	-
SPBC14C8.11c	68.8754	-0.418778	0.323807	-1.29329	0.195909	0.779235	73.3243	84.2083	49.9501	68.019	SPBC14C8.11c	Schizosaccharomyces pombe specific protein	II	2222650	2223129	-
SPBPB8B6.05c	67.1726	0.417749	0.323346	1.29196	0.196371	0.779844	63.6196	51.5157	81.6492	71.9058	SPBPB8B6.05c	L-asparaginase (predicted)	II	54497	55567	-
SPAPB1E7.05	399	0.179511	0.138899	1.29238	0.196224	0.779844	384.953	363.582	407.285	440.18	gde1	glycerophosphoryl diester phosphodiesterase Gde1 (predicted)	I	3294111	3297341	+
SPAC15A10.01	742.544	-0.14814	0.114726	-1.29125	0.196617	0.780213	711.677	849.018	710.828	698.652	atm1	mitochondrial iron-sulfur cluster exporter Atm1	I	3675526	3677607	+
SPAC186.04c	69.8271	0.40988	0.317613	1.2905	0.196877	0.780639	62.5413	57.4598	88.3733	70.9341	SPAC186.04c	N-terminal of transmembrane channel, truncated	I	5538574	5539101	-
SPAC13G7.10	373.117	0.188834	0.146482	1.28913	0.197355	0.781323	325.646	371.507	379.429	415.888	teb1	DNA-binding transcription factor Teb1	I	2313746	2315063	+
SPAC3H1.09c	851.553	0.128098	0.0993532	1.28932	0.197286	0.781323	815.194	812.363	884.693	893.964	avt3	vacuolar amino acid transmembrane transporter Avt3	I	1946819	1948941	-
SPAC23H3.12c	120.977	0.328685	0.256013	1.28386	0.19919	0.78193	88.4205	125.817	123.915	145.755	SPAC23H3.12c	mitochondrial hydrogen/potassium transport system protein (predicted)	I	2515193	2515873	-
SPBPB2B2.02	112.748	0.318637	0.248104	1.28429	0.199041	0.78193	105.673	95.1059	125.836	124.378	say1	ER sterol deacetylase Say1 (predicted)	II	4460559	4461704	+
SPBC32H8.04c	353.18	0.20299	0.157873	1.28578	0.198521	0.78193	370.935	286.308	379.429	376.048	utp24	18S rRNA endonuclease Utp24	II	1459352	1459984	-
SPAC3A11.09	723.289	0.136565	0.106242	1.28542	0.198647	0.78193	697.659	680.601	754.054	760.841	sod22	plasma membrane sodium ion/proton antiporter Sod22	I	3450056	3452608	-
SPAC16C9.02c	875.112	0.130363	0.101287	1.28706	0.198072	0.78193	799.02	871.804	930.801	898.822	mta1	S-methyl-5-thioadenosine phosphorylase Mta1	I	792689	793760	-
SPAC23C4.05c	1667.64	-0.103878	0.0808318	-1.28512	0.198751	0.78193	1783.51	1672.28	1643.55	1571.24	les1	LEA domain protein Les1	I	1036833	1038182	-
SPBC800.10c	721.925	-0.148224	0.115105	-1.28773	0.197841	0.78193	785.002	733.108	631.1	738.492	ede1	EPS15 repeat family actin cortical patch component Ede1	II	270987	274337	-
SPAC30D11.13	495.164	-0.160797	0.124963	-1.28675	0.198181	0.78193	514.349	531.008	458.196	477.105	hus5	SUMO conjugating enzyme E2 Hus5	I	1094500	1095393	-
SPCC63.04	342.242	-0.19243	0.149849	-1.28415	0.199088	0.78193	378.483	351.694	302.582	336.208	mok14	alpha-1,4-glucan synthase Mok14	III	839962	844071	+
SPAC1527.01	304.752	-0.200354	0.155864	-1.28544	0.198638	0.78193	327.803	323.954	270.883	296.368	mok11	alpha-1,3-glucan synthase Mok11	I	4375499	4382692	+
SPAC12B10.11	268.589	-0.217197	0.16871	-1.28739	0.197957	0.78193	292.219	285.318	227.657	269.161	exg2	cell wall glucan glucosidase Exg2	I	4591855	4593567	+
SPBC725.02	506.824	0.163634	0.127566	1.28274	0.199584	0.782067	478.765	477.511	569.623	501.397	mpr1	histidine-containing response regulator phosphotransferase Mpr1	II	1203757	1204644	+
SPAC9E9.11	7249.12	-0.0876243	0.0683917	-1.28121	0.200119	0.782067	7310.87	7627.29	7489.63	6568.69	plr1	pyridoxal reductase Plr1	I	4461784	4462785	+
SPAC3F10.09	607.534	-0.158533	0.123743	-1.28115	0.200142	0.782067	698.738	583.514	560.978	586.907	SPAC3F10.09	1-(5-phosphoribosyl)-5-[(5-phosphoribosylamino) methylideneamino]imidazole-4-carboxamide isomerase (predicted)	I	2832796	2833974	+
SPCC736.09c	204.808	-0.243747	0.189968	-1.28309	0.19946	0.782067	237.226	207.053	178.668	196.283	tfx1	TRAX	III	329749	330444	-
SPBP8B7.15c	180.072	-0.260668	0.20344	-1.2813	0.200087	0.782067	198.407	194.175	146.969	180.736	mpe1	mRNA cleavage ubiquitin-protein ligase E3 Mpe1 (predicted)	II	3660173	3661621	-
SPCC1223.12c	62.3301	-0.426776	0.332801	-1.28238	0.199711	0.782067	77.6375	65.3853	50.9107	55.3869	meu10	GPI anchored cell surface protein involved in ascospore wall assembly Meu10	III	1868480	1869730	-
SPAC1952.06c	421.358	0.171547	0.133991	1.28029	0.200444	0.78218	405.44	387.358	450.512	442.123	SPAC1952.06c	spliceosomal complex subunit (predicted)	I	4975746	4977440	-
SPBC21B10.05c	730.857	-0.135681	0.105984	-1.2802	0.200477	0.78218	751.574	778.679	692.577	700.596	pop3	WD repeat protein Pop3	II	1662947	1663891	+
SPBC1711.05	487.657	0.161563	0.126246	1.27975	0.200634	0.782196	470.138	450.762	527.358	502.369	srp40	nucleocytoplasmic transport chaperone Srp40 (predicted)	II	2141268	2142623	+
SPAC22H10.02	789.957	-0.13103	0.102444	-1.27904	0.200882	0.782566	831.369	820.288	747.33	760.841	SPAC22H10.02	DUF4452 family conserved fungal protein	I	2371752	2372372	+
SPCC970.04c	349.95	0.203497	0.159369	1.27689	0.201642	0.78493	368.778	282.346	379.429	369.246	mob2	protein kinase activator Mob2	III	508053	509308	+
SPAC589.08c	259.932	0.213505	0.167497	1.27468	0.202422	0.78589	229.678	251.634	278.568	279.85	dam1	DASH complex subunit Dam1	I	3106374	3106841	-
SPBC1685.01	460.799	0.175874	0.137964	1.27479	0.202385	0.78589	463.669	402.219	522.555	454.756	pmp1	dual-specificity MAP kinase phosphatase Pmp1	II	496813	497649	+
SPAC24H6.10c	2029.64	0.102984	0.0807923	1.27467	0.202425	0.78589	1847.13	2066.57	2155.54	2049.32	SPAC24H6.10c	phospho-2-dehydro-3-deoxyheptonate aldolase (predicted)	I	468720	469826	+
SPBC1271.14	1027.57	-0.120296	0.0944343	-1.27386	0.202713	0.78589	1030.85	1109.57	986.515	983.36	SPBC1271.14	acetyl-CoA:L-glutamate N-acetyltransferase (predicted)	II	336801	338138	-
SPBC1709.17	837.499	-0.128128	0.100638	-1.27315	0.202964	0.78589	875.579	873.785	818.413	782.218	met7	folylpolyglutamate synthase Met7 (predicted)	II	1132170	1134042	+
SPBC19C7.03	843.668	-0.132102	0.103742	-1.27337	0.202886	0.78589	905.771	858.925	766.542	843.435	cyr1	adenylate cyclase	II	2820008	2825086	+
SPAC821.07c	293.375	-0.205561	0.161366	-1.27389	0.202704	0.78589	308.394	319.992	252.632	292.482	moc3	DNA-binding transcription factor Moc3	I	991752	993278	-
SPAC1783.03	80.42	0.374464	0.294675	1.27077	0.203811	0.787976	64.6979	75.2922	85.4915	96.1983	fta2	CENP-P ortholog Fta2	I	2191008	2192063	+
SPAC1F3.02c	678.696	0.139721	0.109936	1.27093	0.203753	0.787976	658.841	633.049	727.158	695.737	mkh1	MEK kinase (MEKK) Mkh1	I	613498	616848	-
SPAC6G10.07	1144.21	0.11343	0.0893242	1.26987	0.204132	0.788622	1099.87	1098.67	1211.29	1167.01	cbc1	nuclear cap-binding complex large subunit (predicted)	I	3228533	3230924	+
SPAP8A3.03	583.301	0.149059	0.117556	1.26798	0.204806	0.79003	559.637	546.859	634.943	591.765	zip3	ER zinc exporter, ZIP family Zip3 (predicted)	I	5317939	5319300	+
SPAC24H6.04	5412.65	-0.0751123	0.0592337	-1.26807	0.204774	0.79003	5682.64	5425	5286.07	5256.9	hxk1	hexokinase 1	I	483447	484901	-
SPCC306.10	76.9011	-0.384007	0.302978	-1.26744	0.204997	0.790175	95.9686	78.2642	62.4376	70.9341	NA	NA	III	427445	428763	+
SPCC24B10.18	260.619	0.212079	0.167452	1.26651	0.205332	0.790718	252.322	230.83	284.331	274.991	SPCC24B10.18	DUF2462 family protein, human Leydig cell tumor 10 kDa protein homolog	III	932022	932638	+
SPAC630.13c	735.17	0.13504	0.106651	1.26618	0.205447	0.790718	690.111	711.313	748.291	790.964	tsc2	tuberin, GTPase activator Tsc2	I	369945	373964	-
SPAC3H1.04c	784.541	0.130857	0.103443	1.26502	0.205866	0.791731	744.026	753.912	839.546	800.681	mdm31	mitochondrial inner membrane protein Mdm31	I	1936076	1937982	-
SPBC115.01c	336.96	0.1876	0.148415	1.26402	0.206222	0.79191	304.08	325.936	358.296	359.529	rrp46	exosome subunit Rrp46	II	639374	640137	+
SPBC1734.16c	776.812	0.131435	0.103956	1.26433	0.206113	0.79191	755.888	727.164	797.281	826.917	pst3	SIN3 family co-repressor Pst3	II	1091098	1094653	-
SPBC1734.01c	346.957	0.193994	0.15366	1.26249	0.206774	0.792167	293.297	353.675	383.271	357.586	esf1	pre-rRNA processing protein Esf1 (predicted)	II	1059522	1061570	-
SPBC1734.14c	452.429	0.176121	0.139524	1.2623	0.20684	0.792167	464.747	385.377	458.196	501.397	suc1	cyclin-dependent protein kinase regulatory subunit Suc1	II	1088271	1088778	-
SPBC16G5.14c	6341.97	0.0761287	0.0603233	1.26201	0.206945	0.792167	6096.7	6252.22	6286.03	6732.91	rps3	40S ribosomal protein S3 (predicted)	II	4238325	4239326	-
SPAC24C9.10c	738.059	-0.134601	0.106684	-1.26168	0.207063	0.792167	746.183	798.493	708.907	698.652	mrp4	mitochondrial ribosomal protein subunit S2 (predicted)	I	3065418	3066209	-
SPCC548.05c	427.295	-0.168098	0.133069	-1.26324	0.206503	0.792167	462.59	441.846	404.404	400.34	dbl5	ubiquitin-protein ligase E3 Dbl5	III	224087	225643	-
SPAC24H6.02c	147.094	0.28251	0.224607	1.2578	0.208466	0.794008	148.805	116.901	162.338	160.33	tim15	TIM23 translocase complex subunit Tim15 (predicted)	I	488779	489350	+
SPAC3F10.15c	330.992	0.19241	0.152905	1.25836	0.208261	0.794008	314.863	303.15	376.547	329.406	spo12	Spo12 family nuclear protein	I	2848929	2849201	-
SPAC22F8.11	562.154	0.15043	0.119548	1.25833	0.208272	0.794008	547.776	518.129	574.426	608.284	plc1	phosphoinositide phospholipase C Plc1	I	4807786	4810485	+
SPAC1F7.12	15025.3	0.0729199	0.0579757	1.25777	0.208476	0.794008	14629.3	14662.2	16108.9	14700.8	yak3	aldose reductase ARK13 family YakC, implicated in cellular detoxification from family members	I	4249066	4250088	+
SPAC1327.01c	654.038	-0.146688	0.116448	-1.25969	0.207782	0.794008	730.008	644.937	641.667	599.539	SPAC1327.01c	DNA-binding transcription factor, zf-fungal binuclear cluster type (predicted)	I	2205162	2208095	-
SPCC1753.03c	227.353	-0.226421	0.17982	-1.25915	0.207976	0.794008	228.599	261.541	211.327	207.944	rec7	meiotic recombination protein Rec7	III	1547888	1549069	-
SPBC13E7.09	197.12	0.242394	0.192785	1.25733	0.208635	0.794024	191.937	169.407	203.643	223.491	vrp1	verprolin	II	3055475	3056456	+
SPBC215.11c	2068.03	0.114731	0.0913805	1.25553	0.209286	0.794726	1897.81	2073.51	2343.81	1957	SPBC215.11c	aldo/keto reductase, unknown biological role	II	4050462	4051382	-
SPAC11E3.13c	810.952	-0.138604	0.110372	-1.25579	0.209192	0.794726	837.838	861.897	835.704	708.369	gas5	cell wall protein 1,3-beta-glucanosyltransferase Gas5 (predicted)	I	5307065	5308597	-
SPBC32F12.17	52.3657	-0.466163	0.371251	-1.25566	0.209241	0.794726	70.0894	51.5157	48.9895	38.868	NA	NA	NA	NA	NA	NA
SPAC7D4.07c	8301.61	-0.084246	0.067169	-1.25424	0.209755	0.795121	8216.64	8870.6	8506.89	7612.3	trx1	cytosolic thioredoxin Trx1	I	2625457	2625768	+
SPCC1442.06	1930.92	-0.107729	0.0858573	-1.25474	0.209572	0.795121	1930.16	2075.49	1986.48	1731.57	pre8	20S proteasome complex subunit alpha 2, Pre8	III	1778156	1779195	+
SPAC29A4.22	208.374	-0.239165	0.190728	-1.25396	0.209856	0.795121	211.347	239.746	206.524	175.878	SPAC29A4.22	dubious	I	5124392	5124613	+
SPAC688.10	347.418	0.18968	0.151411	1.25274	0.210299	0.795619	334.273	315.038	341.966	398.397	rev3	DNA polymerase zeta catalytic subunit Rev3 (predicted)	I	3129878	3134320	+
SPAC1751.01c	713.767	-0.137049	0.109374	-1.25303	0.210195	0.795619	775.297	720.229	659.918	699.624	gti1	gluconate transmembrane transporter inducer Gti1	I	378192	380354	-
SPCC548.03c	188.06	0.254769	0.203654	1.25099	0.210939	0.79636	159.588	183.277	226.697	182.68	wtf4	wtf antidote element Wtf4 (predicted)	III	221199	222701	-
SPCC330.07c	349.505	0.186737	0.149307	1.2507	0.211046	0.79636	328.881	324.945	346.769	397.425	SPCC330.07c	transmembrane transporter (predicted)	III	120913	122415	-
SPBC1604.01	2084.18	-0.109209	0.0872633	-1.25149	0.210755	0.79636	2349.61	1977.41	1973.99	2035.71	egt1	ergothioneine biosynthesis protein Egt1	II	3930792	3933113	-
SPAC12G12.05c	631.314	-0.144458	0.11552	-1.2505	0.211117	0.79636	648.058	677.629	629.179	570.388	taf9	SAGA complex/transcription factor TFIID complex subunit Taf9	I	338392	338883	+
SPBC1105.01	549.939	0.148758	0.119016	1.2499	0.211337	0.796602	525.132	518.129	572.505	583.992	SPBC1105.01	rRNA processing protein Rrp12-like (predicted)	II	3502416	3505505	+
SPCC162.08c	572.669	0.153427	0.123056	1.2468	0.21247	0.79705	544.541	539.924	559.057	647.152	nup211	nucleoporin nup211	III	1565642	1571155	+
SPBC1709.12	572.302	0.152866	0.122408	1.24882	0.211729	0.79705	581.203	503.269	602.283	602.454	rid1	GTPase binding protein Rid1 (predicted)	II	1122828	1124285	+
SPAC13G7.02c	14670.7	-0.0754409	0.0605509	-1.24591	0.212798	0.79705	15004.5	15104	15058	13516.3	ssa1	Hsp70 family heat shock protein Ssa1	I	2295819	2297753	-
SPBC26H8.12	1165.84	-0.111672	0.0896425	-1.24574	0.212858	0.79705	1243.28	1178.92	1137.33	1103.85	cyc3	cytochrome c heme lyase Cyc3 (predicted)	II	3976841	3977974	+
SPAC1687.12c	1051.13	-0.114108	0.0915846	-1.24593	0.212792	0.79705	1096.63	1088.76	1013.41	1005.71	coq4	ubiquinone biosynthesis protein Coq4 (predicted)	I	925212	926245	-
SPCC1753.01c	693.147	-0.141859	0.113662	-1.24808	0.212002	0.79705	678.25	775.707	668.563	650.067	ssb2	single-stranded DNA binding protein Ssb2	III	1540948	1541914	-
SPAC343.19	582.925	-0.145228	0.116382	-1.24785	0.212086	0.79705	623.257	601.347	559.057	548.039	lsb6	1-phosphatidylinositol 4-kinase Lsb6 (predicted)	I	1681953	1683827	+
SPAC31A2.16	450.089	-0.168534	0.135197	-1.24659	0.212549	0.79705	512.192	440.855	420.734	426.576	gef2	RhoGEF Gef2	I	420466	423903	+
SPAC5D6.06c	365.555	-0.185027	0.148431	-1.24655	0.212562	0.79705	421.615	356.647	345.808	338.152	alg14	UDP-GlcNAc transferase associated protein Alg14 (predicted)	I	1502909	1503587	+
SPCC1919.12c	364.891	0.183353	0.14751	1.24298	0.213874	0.797993	368.778	315.038	390.956	384.793	erm2	multi-spanning vacuolar membrane protease (predicted)	III	2233448	2235979	-
SPAC19B12.11c	480.878	0.158576	0.127668	1.24209	0.214202	0.797993	472.295	436.893	514.87	499.454	bud20	zinc finger ribosome biogenesis protein Bud20 (predicted)	I	4903743	4904176	-
SPBP8B7.13	671.034	0.136712	0.109945	1.24346	0.213697	0.797993	626.492	651.872	695.459	710.313	vac7	PAS complex phosphatidylinositol phosphate kinase activator Vac7 (predicted)	II	3655545	3656375	+
SPAC56F8.05c	1723.41	0.100516	0.0808281	1.24358	0.213654	0.797993	1603.43	1722.8	1737.69	1829.71	mug64	Golgi BAR domain protein (predicted)	I	1134697	1136003	-
SPAPB17E12.13	4728.57	0.0756027	0.0608466	1.24251	0.214047	0.797993	4516.99	4691.89	4777.92	4927.49	rpl1802	60S ribosomal protein L18 (predicted)	I	1285627	1286261	+
SPAC11D3.04c	449.676	-0.163466	0.131568	-1.24244	0.214074	0.797993	477.686	472.557	405.364	443.095	SPAC11D3.04c	polyketide cyclase SnoaL-like domain protein	I	112917	113309	-
SPAC1952.15c	180.985	-0.244389	0.196656	-1.24273	0.213969	0.797993	198.407	194.175	167.141	164.217	rec24	meiotic recombination protein Rec24	I	4996030	4997222	-
SPAC23H4.09	1742.32	-0.0963103	0.0775825	-1.24139	0.214461	0.798375	1788.9	1811.97	1717.52	1650.92	cdb4	endonuclease Cdb4 (predicted)	I	1591938	1593083	-
SPAC589.03c	193.757	0.237582	0.191478	1.24078	0.214687	0.798635	184.389	171.389	213.249	206	noc12	CCAAT-binding factor, Noc1 related	I	3099261	3099830	-
SPAC31G5.06	83.0426	0.356928	0.288248	1.23827	0.215617	0.799849	73.3243	72.3201	87.4127	99.1134	rrg8	mitochondrial conserved fungal protein Rrg8 (predicted)	I	2996304	2997058	+
SPAC1F5.08c	416.002	0.172476	0.139184	1.23919	0.215274	0.799849	386.031	396.275	471.644	410.057	yam8	plasma membrane stretch-activated calcium ion channel Yam8	I	275089	276549	+
SPBC14F5.06	1738.91	0.103333	0.0834537	1.23821	0.215639	0.799849	1775.96	1578.16	1812.61	1788.9	rli1	iron-sulfur ATPase involved in ribosome biogenesis and translation Rli1 (predicted)	II	4164659	4166877	+
SPBC1A4.10c	499.342	-0.157736	0.12732	-1.2389	0.215384	0.799849	525.132	528.036	444.748	499.454	med14	mediator complex subunit Med14	II	1996289	1998928	-
SPBC4F6.13c	411.218	0.168088	0.135885	1.23699	0.216092	0.80095	374.17	400.237	435.142	435.322	erb1	WD repeat/BOP1NT protein Erb1 (predicted)	II	2714424	2716646	-
SPBC2D10.05	2135.64	0.089879	0.0728099	1.23443	0.217041	0.803348	2089.74	2048.74	2237.19	2166.89	exg3	cell wall glucan 1,3-beta-glucosidase Exg3	II	2974828	2976272	+
SPCC18.11c	362.831	-0.178376	0.144504	-1.2344	0.217053	0.803348	373.091	397.265	352.532	328.435	sdc1	Lid2 complex Dpy-30 domain subunit Sdc1	III	1976023	1976436	-
SPAP27G11.04c	363.292	0.176041	0.142744	1.23326	0.217478	0.803793	337.508	344.759	389.995	380.906	tad3	tRNA specific adenosine deaminase subunit Tad3	I	1614501	1615491	-
SPAC1786.01c	3131.69	0.0818551	0.0664075	1.23262	0.217718	0.803793	2995.51	3089.95	3282.3	3159	ptl2	triacylglycerol lipase ptl2	I	3028233	3030323	-
SPBC543.10	753.148	-0.129518	0.105094	-1.23239	0.217802	0.803793	788.237	785.614	701.223	737.52	get1	GET complex (ER membrane insertion) subunit Get1 (predicted)	II	4318947	4319603	+
SPAPB1A10.06c	322.682	-0.185668	0.150611	-1.23276	0.217664	0.803793	345.056	341.787	295.858	308.029	dhx37	ATP-dependent RNA helicase Dhx37 (predicted)	I	1868252	1871850	-
SPAC17A5.12	330.131	-0.183337	0.149094	-1.22967	0.218819	0.806965	350.447	351.694	302.582	315.802	ucp7	UBA/TPR/DNAJ domain protein Ucp7	I	1774258	1776351	+
SPAC29B12.07	807.614	-0.133318	0.10853	-1.2284	0.219298	0.807566	904.693	785.614	755.015	785.133	sec16	multidomain vesicle coat component Sec16 (predicted)	I	5419997	5425984	+
SPBC30D10.04	295.309	-0.203354	0.165492	-1.22878	0.219153	0.807566	318.098	314.048	244.948	304.142	swi3	replication fork protection complex subunit Swi3	II	3090924	3091527	-
SPBC428.19c	589.146	0.145473	0.118507	1.22755	0.219617	0.807827	582.281	536.952	638.785	598.567	utp15	U3 snoRNP-associated WD repeat protein Utp15 (predicted)	II	479203	480896	-
SPAC23A1.03	852.562	0.122752	0.100012	1.22737	0.219685	0.807827	802.255	830.195	875.087	902.709	apt1	adenine phosphoribosyltransferase (APRT) Apt1	I	4083686	4084430	+
SPAC20H4.02	1021.4	-0.116038	0.0946081	-1.22652	0.220004	0.807893	1031.93	1092.73	1002.84	958.096	dsc3	Golgi Dsc E3 ligase complex subunit Dsc3	I	2114011	2114763	+
SPAC31A2.10	416.296	-0.175249	0.142913	-1.22627	0.220099	0.807893	457.199	425.995	355.414	426.576	SPAC31A2.10	Ran GTPase binding protein (predicted)	I	405802	407465	+
SPAC2F7.04	271.876	-0.199345	0.16259	-1.22606	0.220176	0.807893	288.984	292.252	250.711	255.557	med1	mediator complex subunit Med1	I	538395	539847	+
SPAPB17E12.02	5.68669	1.3958	1.14088	1.22345	0.22116	0.808215	4.3132	1.98137	5.76347	10.6887	yip12	SMN family protein Yip12	I	1270750	1271636	+
SPBC3F6.02c	2206.76	-0.0897484	0.0733652	-1.22331	0.221212	0.808215	2275.21	2275.61	2202.61	2073.61	erg26	3 beta-hydroxysteroid dehydrogenase/delta 5-->4-isomerase Erg26 (predicted)	II	4187707	4188729	-
SPCC1020.07	969.215	-0.115601	0.0944643	-1.22375	0.221047	0.808215	1012.52	1003.57	925.998	934.775	SPCC1020.07	pseudouridine-5'-phosphatase (predicted)	III	770722	771725	-
SPAC1565.02c	505.785	-0.154025	0.125762	-1.22473	0.220677	0.808215	558.559	507.231	484.132	473.218	SPAC1565.02c	Rho-type GTPase activating protein, with CRAL-TRIO_domain (predicted)	I	1292617	1293803	-
SPAC2G11.05c	218.615	-0.233659	0.190702	-1.22525	0.22048	0.808215	216.738	255.597	181.549	220.576	rim20	BRO1 domain protein Rim20	I	815515	817620	-
SPAC57A10.06	23.7472	-0.671833	0.549053	-1.22362	0.221095	0.808215	22.6443	35.6647	21.1327	15.5472	mug15	Schizosaccharomyces specific protein Mug15	I	1376587	1377072	+
SPAC4F10.06	463.447	0.160077	0.131004	1.22193	0.221735	0.808761	421.615	453.734	509.107	469.331	bud22	ribosome small subunit biogenesis protein, BUD22 family (predicted)	I	4839114	4840280	+
SPAC222.08c	748.649	-0.127976	0.104755	-1.22166	0.221836	0.808761	785.002	778.679	706.026	724.888	sno1	glutamine aminotransferase subunit Sno1 (predicted)	I	957646	958350	-
SPAC1486.07c	495.114	-0.15923	0.130281	-1.2222	0.221632	0.808761	532.68	512.185	433.221	502.369	mrpl19	mitochondrial ribosomal protein subunit L19 (predicted)	I	3206100	3206534	-
SPAC26F1.12c	284.171	0.195053	0.159788	1.2207	0.2222	0.809164	268.496	261.541	309.306	297.34	hgh1	Armadillo-type fold protein, human HGH1 ortholog, implicated in ribosome biogenesis	I	5153932	5155093	+
SPBC21C3.17c	558.999	0.144323	0.118353	1.21943	0.22268	0.809164	539.15	523.082	591.717	582.048	psg1	membrane trafficking protein, ER to Golgi Psg1 (predicted)	II	3825604	3826214	-
SPBC839.13c	3755.42	0.0800769	0.0656381	1.21998	0.222474	0.809164	3592.89	3709.13	3735.69	3983.97	rpl1601	60S ribosomal protein L13/L16 (predicted)	II	623400	624039	-
SPAC22F3.13	779.826	-0.131823	0.108026	-1.22029	0.222353	0.809164	860.483	770.754	721.395	766.671	tsc1	hamartin	I	675539	678238	-
SPAC20G4.02c	465.425	-0.44012	0.360967	-1.21928	0.222738	0.809164	657.762	414.107	349.651	440.18	fus1	formin Fus1	I	4813225	4817343	-
SPAC29B12.06c	678.684	0.150186	0.123253	1.21852	0.223026	0.809638	700.894	586.486	761.739	665.614	rcd1	CCR4-Not complex RNA-binding protein subunit Rcd1	I	5417960	5418811	-
SPBC32F12.01c	907.463	0.118726	0.0974935	1.21779	0.223304	0.810073	874.501	865.86	963.461	926.03	css1	inositol phosphosphingolipid phospholipase C, Css1	II	2784277	2785551	-
SPAC29E6.10c	640.711	0.141294	0.116081	1.21721	0.223525	0.810299	597.378	621.16	633.022	711.284	nst1	conserved fungal NST1 family protein	I	4418954	4422211	-
SPAC1952.05	259.092	0.202352	0.166558	1.21491	0.224402	0.812565	236.147	245.69	278.568	275.963	gcn5	SAGA complex histone acetyltransferase catalytic subunit Gcn5	I	4974116	4975480	+
SPCC1795.02c	381.513	0.174278	0.143767	1.21223	0.225426	0.812565	377.405	339.805	386.153	422.689	vcx1	vacuolar proton/calcium exchanger (predicted)	III	995522	996816	+
SPBC8D2.17	543.23	0.145246	0.119829	1.21211	0.225472	0.812565	518.662	513.175	560.978	580.105	gmh4	alpha-1,2-galactosyltransferase (predicted)	II	1390183	1391222	+
SPAC1296.06	703.404	-0.134199	0.110549	-1.21392	0.224777	0.812565	704.129	767.782	689.696	652.011	tah18	CIA machinery NADPH-dependent diflavin oxidoreductase Tah18 (predicted)	I	719447	721410	+
SPAC589.04	535.538	-0.14699	0.121031	-1.21448	0.224563	0.812565	576.89	548.84	501.422	515.001	mtx1	metaxin 1 (predicted)	I	3100107	3101001	+
SPCC364.02c	330.581	-0.184334	0.152141	-1.2116	0.225667	0.812565	339.664	363.582	326.597	292.482	bis1	splicing factor Bis1	III	483585	484739	+
SPBC3D6.09	336.545	-0.200612	0.165602	-1.21141	0.225739	0.812565	334.273	385.377	354.454	272.076	dpb4	DNA polymerase epsilon subunit Dpb4	II	1286143	1286945	+
SPAC25G10.04c	93.7842	-0.342246	0.282391	-1.21196	0.225528	0.812565	119.691	90.1525	74.9252	90.3681	rec10	meiotic recombination protein Rec10	I	4301402	4303777	-
SPAC186.03	2.57396	-2.10976	1.74006	-1.21246	0.225335	0.812565	5.3915	2.97206	0.960579	0.9717	SPAC186.03	L-asparaginase (predicted)	I	5535198	5536280	+
SPAC4H3.12c	1.97663	-2.85125	2.35151	-1.21252	0.225313	0.812565	0	6.9348	0	0.9717	NA	NA	NA	NA	NA	NA
SPBP4H10.06c	605.462	0.13901	0.114894	1.2099	0.226317	0.814074	565.029	587.477	645.509	623.831	cut14	condensin complex SMC subunit Smc2	II	2877850	2881368	-
SPCC1235.18	18.5054	0.742844	0.614529	1.2088	0.226739	0.814781	10.783	16.8417	21.1327	25.2642	SPCC1235.18	dubious	III	210809	211288	+
SPAC15A10.02	627.232	0.140129	0.115947	1.20856	0.226833	0.814781	581.203	612.244	688.735	626.746	taf12	SAGA complex/transcription factor TFIID complex subunit A Taf12	I	3678085	3679437	+
SPAC227.05	313.017	-0.193758	0.160624	-1.20628	0.227708	0.817353	305.159	362.591	307.385	276.934	gim3	prefoldin subunit 4, Gim3 (predicted)	I	505984	506355	+
SPAC11E3.09	500.785	0.155011	0.128803	1.20347	0.228794	0.819422	471.217	476.52	491.816	563.586	pyp3	protein-tyrosine phosphatase Pyp3	I	5298838	5299854	+
SPBC409.21	623.153	0.137145	0.113979	1.20325	0.22888	0.819422	601.691	585.496	633.982	671.445	sec66	ER protein translocation subcomplex subunit Sec66 (predicted)	II	1176861	1177439	+
SPAC57A7.12	1971.34	0.0900218	0.0747773	1.20387	0.228641	0.819422	1950.64	1869.43	2041.23	2024.05	ssz1	heat shock protein Ssz1 (predicted)	I	1515089	1516914	-
SPBP8B7.01c	176.688	-0.242271	0.201367	-1.20313	0.228926	0.819422	203.799	179.314	162.338	161.302	pop7	RNAseP RNAse MRP subunit Pop7	II	3634100	3634525	-
SPCC1450.14c	425.881	0.162508	0.135262	1.20143	0.229584	0.82033	422.693	381.414	452.433	446.982	ero12	ER protein folding oxidoreductin Ero1b	III	1759295	1760998	-
SPAC1071.01c	1299.91	0.101968	0.0848858	1.20123	0.22966	0.82033	1249.75	1258.17	1334.24	1357.46	pta1	mRNA cleavage and polyadenylation specificity factor complex subunit Pta1	I	3855626	3857792	-
SPBC25B2.10	993.737	-0.115192	0.0958286	-1.20206	0.22934	0.82033	1067.52	999.602	974.027	933.804	SPBC25B2.10	Usp (universal stress protein) family protein	II	2616521	2617444	+
SPBC800.13	180.855	0.237458	0.198075	1.19883	0.230595	0.820908	173.606	158.51	193.076	198.227	cnp20	histone H4 variant, CENP-T ortholog	II	279664	281103	+
SPAC806.08c	194.713	0.229828	0.191462	1.20038	0.229991	0.820908	181.154	177.333	200.761	219.604	mod21	gamma tubulin complex GPC5 subunit Mod21	I	248680	250770	-
SPCC18.05c	854.129	0.125716	0.104828	1.19926	0.230427	0.820908	862.639	771.745	920.235	861.898	rsa4	notchless-like ribosome biogenesis protein Rsa4 (predicted)	III	1963108	1964774	-
SPBC17D11.01	1076.67	0.110282	0.0919975	1.19875	0.230625	0.820908	1015.76	1055.08	1095.06	1140.78	nep1	NEDD8 protease Nep1	II	3304837	3306253	+
SPBP23A10.05	762.372	-0.131644	0.109733	-1.19967	0.230266	0.820908	754.809	839.111	758.857	696.709	ssr4	SWI/SNF and RSC complex subunit Ssr4	II	2003716	2005099	+
SPAC4F8.05c	442.304	-0.157149	0.131223	-1.19757	0.231084	0.821972	456.121	476.52	424.576	412.001	mrpl28	mitochondrial ribosomal protein subunit L28 (predicted)	I	2669813	2670169	+
SPAC27E2.04c	0.966139	3.34532	2.79893	1.19521	0.232004	0.822095	0	0	1.92116	1.9434	mug155	dubious	I	4010686	4011249	-
SPCC613.08	321.725	0.187401	0.156584	1.19681	0.23138	0.822095	325.646	276.401	352.532	332.321	SPCC613.08	nuclear export chaperone (predicted)	III	93146	94169	+
SPAC23D3.03c	660.562	0.139058	0.116606	1.19255	0.233047	0.822095	583.36	673.667	707.947	677.275	SPAC23D3.03c	GTPase activating protein (predicted)	I	4340146	4341564	-
SPBC19C7.09c	653.153	0.132613	0.111193	1.19264	0.233012	0.822095	636.196	610.263	676.248	689.907	uve1	endonuclease Uve1	II	2837786	2839585	-
SPBC3B8.10c	774.632	0.123126	0.10322	1.19285	0.232928	0.822095	746.183	737.071	812.65	802.624	nem1	Nem1-Spo7 phosphatase complex catalytic subunit Nem1 (predicted)	II	3373465	3374895	+
SPBC2F12.07c	2979.28	0.079801	0.0668912	1.193	0.232871	0.822095	2853.18	2940.36	3111.32	3012.27	rpl802	60S ribosomal protein L8/L2 (predicted)	II	1726677	1727438	+
SPAC343.05	4791.1	-0.0758612	0.063519	-1.19431	0.232358	0.822095	4727.26	5106	4706.84	4624.32	vma1	V-type ATPase V1 domain, subunit A	I	1647259	1649215	+
SPBC8E4.01c	4688.15	-0.0775706	0.064925	-1.19477	0.232176	0.822095	4838.33	4789.97	4360.07	4764.24	pho84	inorganic phosphate transmembrane transporter (predicted)	II	4444252	4445970	+
SPCC576.07	2338.09	-0.0859119	0.0720204	-1.19288	0.232915	0.822095	2357.16	2457.89	2313.07	2224.22	ret3	coatomer zeta subunit (predicted)	III	2093841	2094413	+
SPAC17H9.16	954.399	-0.115658	0.0967645	-1.19525	0.231989	0.822095	958.608	1026.35	922.156	910.483	tom22	mitochondrial TOM complex subunit Tom22 (predicted)	I	2031213	2031708	+
SPAC30D11.01c	595.09	-0.138205	0.115887	-1.19258	0.233033	0.822095	634.04	613.235	580.19	552.897	gto2	alpha-glucosidase (predicted)	I	1120548	1123529	+
SPAC17G8.13c	599.934	-0.142749	0.11951	-1.19445	0.232302	0.822095	662.076	597.384	546.569	593.709	mst2	histone acetyltransferase Mst2	I	2365447	2366833	-
SPCC737.07c	480.488	0.153029	0.128493	1.19095	0.233674	0.823577	473.373	436.893	490.856	520.831	SPCC737.07c	DNA polymerase alpha-associated DNA helicase A (predicted)	III	1898151	1900289	-
SPAC12B10.01c	1055.01	-0.110575	0.0928689	-1.19065	0.23379	0.823577	1103.1	1087.77	984.593	1044.58	SPAC12B10.01c	HECT-type ubiquitin-protein ligase E3, implicated in negative regulation of ubiquitinated chromatin formation (predicted)	I	4570498	4575441	-
SPAC19D5.06c	260.699	0.200569	0.168646	1.18929	0.234327	0.823974	240.461	244.7	262.238	295.397	din1	RNA NAD-cap (NAD-forming) hydrolase/RNA pyrophosphohydrolase Din1	I	5220220	5221278	-
SPAC343.04c	828.544	-0.121027	0.101777	-1.18914	0.234386	0.823974	890.675	836.139	789.596	797.766	gid7	GID complex subunit Gid7 (predicted)	I	1643933	1645634	-
SPBC20F10.04c	531.402	-0.1444	0.12135	-1.18995	0.234065	0.823974	553.167	562.71	491.816	517.916	nse4	Smc5-6 complex non-SMC delta-kleisin subunit Nse4	II	3289466	3290628	-
SPBC14C8.16c	890.483	0.117206	0.098617	1.1885	0.234636	0.82429	877.735	831.186	925.038	927.973	bot1	mitochondrial ribosomal protein subunit S35	II	2232164	2233111	-
SPBC1711.11	296.989	-0.188054	0.15832	-1.18781	0.234908	0.824294	311.628	320.982	292.016	263.331	atg2402	autophagy associated protein Atg24c	II	2155273	2156445	+
SPBC685.05	104.353	-0.307983	0.259316	-1.18768	0.23496	0.824294	124.004	106.994	97.0185	89.3964	gpi15	pig-H (predicted)	II	2777842	2778500	+
SPAC1751.04	405.756	0.165884	0.140031	1.18463	0.236164	0.825608	407.597	357.638	438.985	418.803	loc1	ribosome biogenesis protein Loc1 (predicted)	I	384320	385220	+
SPBC3B9.08c	681.678	0.128768	0.108769	1.18387	0.236464	0.825608	656.684	645.927	706.986	717.115	mnh1	exon junction complex subunit, Mago-nashi homolog Mnh1	II	4001878	4002653	-
SPAC1805.12c	3147.27	0.0768755	0.0648608	1.18524	0.235923	0.825608	3039.73	3086.98	3222.74	3239.65	uep1	ribosomal-ubiquitin fusion protein Ubi2	I	2794338	2794724	-
SPBC409.10	1702.97	-0.0960774	0.0810111	-1.18598	0.235631	0.825608	1694.01	1824.84	1683.89	1609.13	ade7	phosphoribosylamidoimidazolesuccinocarboxamide synthase, SAICAR synthetase, Ade7	II	1157118	1158017	+
SPAC823.14	1237.98	-0.103963	0.0878412	-1.18353	0.2366	0.825608	1270.24	1294.83	1228.58	1158.27	ptf1	Mst2 histone acetytransferase acytyltransferase complex, predicted phosphoric monoester hydrolase Ptf1	I	2606185	2607189	+
SPAC4F8.02c	629.803	-0.13545	0.114452	-1.18346	0.236626	0.825608	631.883	686.546	608.046	592.737	mrpl40	mitochondrial ribosomal protein subunit L40 (predicted)	I	2673980	2674819	+
SPBC19C7.02	497.553	-0.148164	0.125175	-1.18366	0.236547	0.825608	524.053	522.092	456.275	487.793	ubr1	N-end-recognizing protein, UBR ubiquitin-protein ligase E3 Ubr1	II	2813349	2819225	+
SPAC17A2.10c	36.3507	-0.513445	0.43384	-1.18349	0.236615	0.825608	39.8971	45.5716	26.8962	33.0378	SPAC17A2.10c	Schizosaccharomyces pombe specific protein	I	3574995	3575687	-
SPBC21C3.09c	787.945	-0.124856	0.10555	-1.18291	0.236845	0.82581	823.82	820.288	790.556	717.115	oaa1	mitochondrial acylpyruvase Oaa1 (predicted)	II	3811374	3812188	-
SPBPB8B6.02c	0.963359	3.34184	2.8281	1.18166	0.237343	0.826105	0	0	2.88174	0.9717	SPBPB8B6.02c	plasma membrane urea transmembrane transporter (predicted)	II	44810	46831	-
SPCC10H11.01	394.442	0.165195	0.139755	1.18203	0.237192	0.826105	375.248	368.535	396.719	437.265	prp11	ATP-dependent RNA helicase Prp11	III	519540	522584	+
SPAC3G9.01	197.899	-0.228946	0.19378	-1.18147	0.237414	0.826105	222.13	205.072	167.141	197.255	nsk1	Clp1-interacting, microtubule plus-end binding Nsk1	I	3181639	3183027	-
SPBP16F5.02	323.856	0.179036	0.151701	1.18019	0.237924	0.826667	294.376	313.057	333.321	354.67	mcs2	transcription factor TFIIH complex cyclin Mcs2	II	1893156	1894262	+
SPBC15D4.14	557.666	0.143809	0.121888	1.17985	0.238061	0.826667	548.854	511.194	611.889	558.727	taf5l	transcription factor TFIID complex subunit Taf5-like	II	3033881	3035865	+
SPCC1235.11	1868.44	0.090001	0.0762434	1.18044	0.237824	0.826667	1822.33	1798.1	1882.73	1970.61	mpc1	mitochondrial carrier, pyruvate Mpc1 (predicted)	III	200130	200987	+
SPAC11D3.17	116.227	0.29249	0.248104	1.1789	0.238438	0.82734	94.8903	113.929	121.994	134.095	SPAC11D3.17	DNA-binding transcription factor, zf-fungal binuclear cluster type	I	142675	144432	+
SPAC1952.08c	892.02	-0.116677	0.0990008	-1.17855	0.238578	0.82734	948.903	907.469	876.048	835.662	SPAC1952.08c	pyridoxamine 5'-phosphate oxidase (predicted)	I	4980139	4980786	-
SPAC5H10.08c	859.039	-0.117659	0.0999176	-1.17756	0.238972	0.828146	902.536	885.674	844.349	803.596	pan6	pantoate-beta-alanine ligase	I	160094	160945	-
SPBC23G7.14	422.126	0.164475	0.139825	1.17629	0.239478	0.828261	398.971	397.265	482.211	410.057	SPBC23G7.14	Schizosaccharomyces specific protein	II	2126633	2127028	+
SPCC306.04c	437.87	-0.17442	0.148284	-1.17626	0.239491	0.828261	521.897	407.172	389.034	433.378	set1	histone lysine H3-K4 methyltransferase Set1	III	412765	415527	-
SPBPB2B2.07c	2.57118	-2.11408	1.79618	-1.17698	0.239203	0.828261	5.3915	2.97206	1.92116	0	SPBPB2B2.07c	S. pombe specific DUF999 protein family 7	II	4474145	4474931	-
SPBC3B8.03	7982.34	-0.0734106	0.0624574	-1.17537	0.239847	0.82893	7786.4	8583.31	7905.56	7654.08	lys9	saccharopine dehydrogenase	II	3391817	3393169	-
SPCC1020.03	471.141	-0.151169	0.12869	-1.17468	0.240125	0.82933	513.27	478.501	437.063	455.727	mmt1	mitochondrial iron ion transmembrane transporter Mmt1 (predicted)	III	784250	785705	-
SPAC637.03	2477.8	0.0958109	0.0816361	1.17363	0.240542	0.83021	2379.81	2411.33	2755.9	2364.15	SPAC637.03	DUF1774 family multi-spanning conserved fungal membrane protein	I	4542554	4543363	+
SPCC962.06c	706.025	0.130246	0.111095	1.17238	0.241043	0.830259	712.756	636.021	731.001	744.322	bpb1	KH and CC/hC domain splicing factor Bpb1	III	556396	558205	-
SPBC1778.01c	2035.5	0.0867362	0.0739492	1.17291	0.24083	0.830259	1959.27	1989.3	2135.37	2058.06	zuo1	ribosome-associated chaperone, zuotin (predicted)	II	3094994	3096322	-
SPAC3G6.03c	723.879	-0.124311	0.10602	-1.17252	0.240988	0.830259	760.201	749.95	695.459	689.907	SPAC3G6.03c	Maf-like protein, nucleoside-triphosphate diphosphatase, human ASMTL ortholog	I	5383955	5385153	-
SPBC16D10.04c	494.476	0.14862	0.126917	1.171	0.241601	0.830553	474.452	463.641	495.659	544.152	dna2	DNA replication endonuclease-helicase Dna2	II	3592359	3596692	-
SPAC3G9.09c	2110.42	0.0847347	0.0723303	1.1715	0.241399	0.830553	2054.16	2042.8	2161.3	2183.41	tif211	translation initiation factor eIF2 alpha subunit	I	3166456	3167544	+
SPBC1703.10	3231.25	-0.0762852	0.0651659	-1.17063	0.241747	0.830553	3259.7	3373.29	3166.07	3125.96	ypt1	GTPase Ypt1	II	2932989	2934041	+
SPAC2F3.08	1113.7	-0.107576	0.091902	-1.17056	0.241778	0.830553	1161.33	1149.2	1112.35	1031.95	sut1	plasma membrane sucrose/maltose:proton symporter Sut1	I	3936053	3937780	+
SPBC902.04	819.993	0.118435	0.101246	1.16977	0.242092	0.830778	786.08	786.605	838.585	868.7	rmn1	NURS complex subunit, RNA-binding protein Rmn1	II	489882	491833	+
SPBC30D10.06	850.42	-0.116856	0.099912	-1.16958	0.242168	0.830778	894.988	874.776	802.083	829.832	lsm4	Lsm2-8 complex subunit Lsm4	II	3088425	3088893	-
SPAC212.12	161.634	0.251521	0.215165	1.16897	0.242418	0.831076	130.474	164.454	180.589	171.019	SPAC212.12	S. pombe specific GPI anchored protein family 1	I	15855	16226	+
SPCP20C8.01c	474.686	0.150447	0.128823	1.16786	0.242863	0.832046	457.199	442.837	520.634	478.076	SPCP20C8.01c	DUF1773 family protein	III	28680	29423	-
SPAC3H8.07c	431.765	-0.154916	0.132719	-1.16725	0.243111	0.832337	442.103	467.604	406.325	411.029	pac10	prefoldin subunit 3 Pac10 (predicted)	I	600883	601485	-
SPBC1604.05	13955.3	-0.0609761	0.0523432	-1.16493	0.244048	0.833871	13957.5	14542.3	13738.2	13583.4	pgi1	glucose-6-phosphate isomerase (predicted)	II	3921802	3923454	-
SPAC3F10.04	1275.28	-0.102323	0.0877977	-1.16544	0.24384	0.833871	1314.45	1326.53	1276.61	1183.53	gsa1	glutathione synthetase large and small subunit Gsa1	I	2823967	2825463	+
SPAC25B8.01	640.375	-0.130128	0.111698	-1.165	0.24402	0.833871	671.78	666.732	620.534	602.454	dap1	cytochrome P450 regulator Dap1	I	4155473	4155973	+
SPAC3H8.06	669.712	0.127881	0.10983	1.16435	0.244281	0.834111	635.118	644.937	710.828	687.964	aur1	inositol phosphorylceramide synthase Aur1 (predicted)	I	598916	600184	+
SPBC106.08c	591.449	0.135198	0.116275	1.16274	0.244934	0.835783	547.776	579.551	626.297	612.171	mug2	DUF1773 family protein	II	387841	388731	-
SPBC691.01	260.513	0.210734	0.181682	1.15991	0.246087	0.83656	266.34	216.96	249.751	309.001	pfa5	vacuolar membrane palmitoyltransferase Pfa5 (predicted)	II	1420542	1421783	+
SPCC4B3.18	411.884	0.162522	0.140046	1.16049	0.24585	0.83656	387.109	390.33	466.841	403.255	ppc1	phosphopantothenate-cysteine ligase Cab2 (predicted)	III	1143091	1144041	-
SPCC1672.02c	974.133	0.11277	0.0971909	1.16029	0.245931	0.83656	978.017	894.59	1018.21	1005.71	sap1	switch-activating protein Sap1	III	562353	563117	-
SPAC24B11.05	965.593	-0.113117	0.097534	-1.15977	0.246143	0.83656	1036.25	970.873	899.102	956.153	SPAC24B11.05	pyrimidine 5'-nucleotidase (predicted)	I	205213	205893	+
SPAC3H5.09c	389.923	-0.167257	0.144061	-1.16101	0.245636	0.83656	438.868	386.368	348.69	385.765	SPAC3H5.09c	mitochondrial protein, human KIAA0100 ortholog (predicted)	I	3416722	3424821	+
SPBC4C3.08	205.687	-0.217131	0.187107	-1.16047	0.245859	0.83656	211.347	230.83	196.919	183.651	otg2	alpha-1,3-galactosyltransferase	II	3121286	3122404	-
SPCC126.04c	896.838	-0.113219	0.0976639	-1.15927	0.246344	0.836687	919.789	944.124	870.285	853.152	sgf73	SAGA complex deubiquitinating submodule subunit Sgf73	III	2122751	2123856	-
SPBC1D7.01	568.25	0.136173	0.117553	1.1584	0.246702	0.836791	536.993	545.868	604.204	585.935	gim6	prefoldin subunit 1 (predicted)	II	1756510	1757096	-
SPAC144.14	411.288	-0.157714	0.136104	-1.15878	0.246547	0.836791	420.537	446.8	380.389	397.425	klp8	kinesin-like protein Klp8	I	4681626	4683213	+
SPAC23D3.07	1934.59	-0.0867665	0.0749589	-1.15752	0.247059	0.837448	1973.29	2012.08	1906.75	1846.23	pup1	20S proteasome complex subunit beta 2 Pup1	I	4351018	4351934	+
SPCC553.09c	408.24	-0.157104	0.135813	-1.15677	0.247368	0.837937	439.946	421.042	381.35	390.623	spb70	DNA polymerase alpha B-subunit	III	287640	289486	+
SPCC18.19c	10.572	0.971233	0.840831	1.15509	0.248055	0.839709	4.3132	9.90686	9.60579	18.4623	ost5	oligosaccharyltransferase complex zeta subunit Ost5 (predicted)	III	1966855	1967345	-
SPAC29B12.03	3137.37	0.0749862	0.0649711	1.15415	0.24844	0.840456	3036.49	3075.09	3240.99	3196.89	spd1	ribonucleotide reductase (RNR) inhibitor	I	5412489	5412863	+
SPBP8B7.03c	12244.8	0.0621265	0.0538862	1.15292	0.248944	0.840493	11793.4	12168.6	12771.9	12245.4	rpl402	60S ribosomal protein L4 (predicted)	II	3636555	3637646	-
SPBC32F12.11	65615.5	-0.0574096	0.0497934	-1.15296	0.248928	0.840493	68252	65590.4	63230.1	65389.6	tdh1	glyceraldehyde-3-phosphate dehydrogenase Tdh1	II	2807637	2808647	+
SPCC1259.12c	929.768	-0.110804	0.0960691	-1.15338	0.248753	0.840493	963.999	966.91	902.944	885.219	gid1	GID complex subunit, Ran GTPase binding protein Gid1 (predicted)	III	1056598	1058213	-
SPBC19C2.03	418.867	0.160083	0.139019	1.15152	0.24952	0.84137	384.953	406.181	412.088	472.246	rpc10	DNA-directed RNA polymerase I, II and III subunit Rpc10	II	1675735	1675979	+
SPCC1620.14c	480.861	0.15561	0.135185	1.15109	0.249697	0.84137	428.085	481.474	468.763	545.124	snf22	ATP-dependent DNA helicase Snf22	III	2172623	2177665	-
SPCC663.10	1256.55	-0.0993864	0.0863124	-1.15147	0.249538	0.84137	1278.86	1320.58	1223.78	1202.96	trm44	tRNA(Ser) Um(44) 2'-O-methyltransferasetRNA Trm44 (predicted)	III	1651272	1652780	+
SPAC22E12.04	1127.26	0.105507	0.0917063	1.15049	0.249942	0.841641	1050.26	1121.46	1143.09	1194.22	ccs1	superoxide dismutase copper chaperone Ccs1	I	5024936	5026036	+
SPAC4F8.01	763.689	-0.122654	0.106653	-1.15003	0.250131	0.841723	809.803	782.642	763.66	698.652	did4	ESCRT III complex subunit Did4	I	2675099	2675970	-
SPBC887.01	310.662	-0.176309	0.153477	-1.14877	0.250652	0.842157	321.333	337.824	294.898	288.595	adi1	acireductone dioxygenase family Adi1 (predicted)	II	3540222	3540758	+
SPAC8C9.17c	270.965	-0.206742	0.179909	-1.14915	0.250494	0.842157	309.472	271.448	286.253	216.689	spc34	DASH complex subunit Spc34	I	3674300	3674794	-
SPBC28F2.07	169.373	-0.235044	0.20465	-1.14852	0.250754	0.842157	193.016	173.37	153.693	157.415	sfr1	Swi five-dependent recombination mediator Sfr1	II	1580688	1581587	+
SPAC23H3.02c	393.927	0.158036	0.137792	1.14691	0.251417	0.843277	375.248	369.526	408.246	422.689	ini1	RING finger-like protein Ini1	I	2494814	2495318	-
SPAC4G8.11c	215.223	-0.210268	0.183297	-1.14715	0.251321	0.843277	232.913	228.849	188.273	210.859	atp10	mitochondrial F1-FO ATP synase chaperone Atp10 (predicted)	I	782142	783144	-
SPBC557.02c	160.751	0.243267	0.212262	1.14607	0.251766	0.843895	134.787	159.5	178.668	170.047	SPBC557.02c	DUF2458 conserved fungal protein	II	2488325	2488936	-
SPAC15E1.07c	2.70601	2.03937	1.78715	1.14113	0.253815	0.844211	2.1566	0	6.72405	1.9434	moa1	meiosis-specific kinetochore regulator (Meikin) Moa1	I	3728516	3729034	-
SPAC4F10.15c	486.188	0.14925	0.130324	1.14522	0.252118	0.844211	474.452	447.79	479.329	543.18	wsp1	WASp homolog	I	4861530	4863448	-
SPBC17F3.02	924.591	0.116491	0.102012	1.14194	0.25348	0.844211	880.97	893.599	1022.06	901.737	nak1	PAK-related GC kinase Nak1	II	2482246	2484320	-
SPAP27G11.05c	909.957	0.1107	0.0967807	1.14382	0.252699	0.844211	872.344	877.748	942.328	947.407	vps41	HOPS complex subunit Vps41 (predicted)	I	1615930	1618744	-
SPBC36B7.08c	1151.75	0.10316	0.0902262	1.14335	0.252892	0.844211	1123.59	1097.68	1157.5	1228.23	ccp1	histone chaperone, CENP-A nucleosome disassembly Ccp1	II	2394575	2395561	-
SPAC23C4.19	1288.15	0.0982383	0.0859982	1.14233	0.253317	0.844211	1271.31	1217.55	1317.91	1345.8	spt5	DSIF transcription elongation factor complex subunit Spt5	I	1063867	1066839	+
SPCC1322.04	8280.11	0.0716898	0.0627688	1.14212	0.253403	0.844211	8271.63	7877.94	8884.39	8086.49	fyu1	UTP-glucose-1-phosphate uridylyltransferase Fyu1	III	1292178	1293698	+
SPBC17D11.06	688.163	-0.125447	0.109938	-1.14107	0.253841	0.844211	714.912	721.22	682.972	633.548	spp2	DNA primase large subunit Spp2	II	3317783	3319462	+
SPAC22H10.08	694.641	-0.127906	0.111966	-1.14236	0.253303	0.844211	766.671	684.564	672.405	654.926	SPAC22H10.08	DUF2009 family protein, conserved in yeast and apicomplexa	I	2385907	2387441	+
SPAC31G5.12c	430.084	-0.153349	0.13434	-1.1415	0.253663	0.844211	470.138	435.902	418.812	395.482	maf1	repressor of RNA polymerase III Maf1	I	3008184	3009317	-
SPAC17H9.20	339.235	-0.173995	0.152282	-1.14259	0.253211	0.844211	339.664	379.433	300.661	337.18	psc3	mitotic cohesin complex, HEAT repeat subunit Psc3	I	2036403	2039520	+
SPAC9G1.15c	101.975	-0.329824	0.288162	-1.14458	0.252384	0.844211	99.2035	127.799	70.1223	110.774	mzt1	mitotic spindle organizing protein Mzt1	I	1985350	1985544	-
SPAC1006.09	508.274	0.152012	0.13331	1.14029	0.254165	0.844315	433.476	529.026	522.555	548.039	win1	MAP kinase kinase kinase Win1	I	5090441	5094751	+
SPCC895.09c	492.35	0.148001	0.129803	1.1402	0.254202	0.844315	476.608	457.697	483.171	551.926	ucp12	ATP-dependent RNA helicase Ucp12, unknown location and role, implicated in mRNA processing (predicted)	III	1017094	1021291	-
SPAC1805.07c	137.979	0.255944	0.224983	1.13761	0.255282	0.845384	119.691	131.761	149.85	150.613	dad2	DASH complex subunit Dad2	I	2785536	2786148	-
SPBC2G2.11	956.023	0.119168	0.104781	1.1373	0.255412	0.845384	849.7	982.761	953.855	1037.78	myr1	N-myristoyltransferase Myr1 (predicted)	II	3455224	3456800	+
SPBC577.11	1236.36	0.0984676	0.0865781	1.13733	0.255402	0.845384	1178.58	1209.63	1284.29	1272.93	SPBC577.11	DUF3074 family protein, implicated in vesicle trafficking or lipid metabolism	II	771318	772347	+
SPBC11C11.09c	6200.05	0.064124	0.0563219	1.13853	0.2549	0.845384	6027.69	6096.68	6295.63	6380.18	rpl502	60S ribosomal protein L5	II	3364746	3365630	-
SPAC2G11.13	858.719	-0.114232	0.100343	-1.13842	0.254945	0.845384	919.789	865.86	817.453	831.775	atg22	vacuolar amino acid transmembrane transporter Atg22	I	836383	837972	+
SPAC222.19	306.989	-0.175187	0.154071	-1.13705	0.255516	0.845384	320.255	330.889	284.331	292.482	lam3	Ragulator complex subunit, human LAMTOR3 ortholog	I	949646	950047	+
SPAC16E8.04c	658.414	-0.13947	0.122807	-1.13569	0.256086	0.846724	675.015	705.369	690.656	562.614	aro7	chorismate mutase Aro7 (predicted)	I	3506031	3506845	-
SPBC577.09	319.848	0.173753	0.153133	1.13466	0.256519	0.847608	288.984	312.066	327.557	350.784	ckn1	ERCC-8 DNA repair homolog	II	767782	769281	+
SPBC29A3.17	114.13	0.278061	0.245657	1.13191	0.257673	0.848568	100.282	106.003	123.915	126.321	gef3	Cdc42/Rho3/Rho4 RhoGEF Gef3	II	2070386	2072019	+
SPAC18G6.09c	271.775	0.190001	0.167918	1.13151	0.25784	0.848568	236.147	271.448	303.543	275.963	edc1	Dcp2-Dcp1 mRNA-decapping complex subunit Edc1	I	2233149	2234087	-
SPBC30D10.15	400.661	0.156001	0.137952	1.13084	0.258124	0.848568	394.657	363.582	419.773	424.633	SPBC30D10.15	snoRNP assembly factor Naf1 (predicted)	II	3065947	3067497	-
SPBC1289.03c	5371.78	0.0676807	0.0597585	1.13257	0.257395	0.848568	5128.39	5362.58	5422.47	5573.67	spi1	Ran GTPase Spi1	II	4386347	4387316	-
SPAC23H3.10	686.279	-0.126301	0.111691	-1.1308	0.258137	0.848568	679.328	752.922	662.799	650.067	ssr2	SWI/SNF and RSC complex subunit Ssr2	I	2511251	2512762	+
SPCC24B10.10c	470.736	-0.14772	0.130475	-1.13217	0.257562	0.848568	486.313	503.269	471.644	421.718	yta4	mitochondrial outer membrane ATPase Msp1/Yta4 (predicted)	III	918772	919839	-
SPAC2F3.15	323.942	-0.178419	0.157551	-1.13245	0.257446	0.848568	374.17	314.048	315.07	292.482	lsk1	P-TEFb-associated cyclin-dependent protein kinase Lsk1	I	3954471	3956415	+
SPBC13G1.15c	6.36451	-1.19229	1.05246	-1.13286	0.257273	0.848568	10.783	6.9348	2.88174	4.8585	SPBC13G1.15c	Schizosaccharomyces pombe specific protein	II	3741441	3741776	-
SPBC713.09	958.707	-0.11067	0.0979494	-1.12986	0.258533	0.84882	1036.25	955.022	901.984	941.577	SPBC713.09	Schizosaccharomyces specific protein	II	884959	886187	+
SPAC2E1P3.01	1112.03	-0.111911	0.0990503	-1.12983	0.258546	0.84882	1092.32	1217.55	1129.64	1008.62	SPAC2E1P3.01	dehydrogenase (predicted)	I	2923322	2924368	+
SPBC18E5.09c	223.092	0.207836	0.18467	1.12544	0.260402	0.850546	222.13	192.193	254.553	223.491	SPBC18E5.09c	Schizosaccharomyces specific protein	II	2090557	2090943	-
SPAC3A11.14c	316.406	0.17835	0.158334	1.12641	0.259991	0.850546	310.55	283.336	310.267	361.472	pkl1	kinesin-14 family minus-end directed microtubule motor Pkl1	I	3438933	3441651	+
SPAC17C9.01c	390.719	0.156889	0.13916	1.1274	0.259573	0.850546	364.465	374.479	425.536	398.397	nuc2	anaphase-promoting complex TPR lobe subcomplex subunit Apc3	I	4498132	4500280	+
SPBC800.08	405.511	0.153277	0.136171	1.12561	0.260329	0.850546	379.561	388.349	418.812	435.322	gcd10	tRNA (m1A) methyltransferase non-catalytic subunit Gcd10 (predicted)	II	265374	266898	+
SPBC21B10.10	4963.08	0.0699373	0.0620138	1.12777	0.259418	0.850546	4693.84	4991.08	5160.23	5007.17	rps402	40S ribosomal protein S4 (predicted)	II	1651022	1651810	-
SPAC57A10.09c	2430.35	-0.0859604	0.0762731	-1.12701	0.259739	0.850546	2468.23	2537.15	2485.02	2231.02	nhp6	High-mobility group non-histone chromatin protein (predicted)	I	1380838	1381536	-
SPBC25H2.03	554.009	-0.135096	0.120021	-1.1256	0.260335	0.850546	582.281	577.57	508.146	548.039	vac14	PAS complex subunit, involved in phosphoinositide metabolism Vac14 (predicted)	II	3276687	3279509	-
SPAC824.08	241.584	-0.205149	0.181968	-1.12739	0.259579	0.850546	246.93	270.457	249.751	199.198	gda1	Golgi nucleoside-diphosphatase Gda1	I	1698038	1699708	+
SPAC1782.01	956.92	-0.107615	0.0956889	-1.12464	0.260743	0.851118	984.487	1000.59	901.023	941.577	ecm29	proteasome assembly chaperone Ecm29	I	4755007	4760046	+
SPBC13G1.02	3320.99	-0.0749995	0.0667357	-1.12383	0.261085	0.851691	3515.25	3299.98	3264.05	3204.67	mpg2	mannose-1-phosphate guanyltransferase (predicted)	II	3729817	3731224	+
SPAC30D11.06c	803.239	0.117362	0.104468	1.12342	0.261259	0.851714	749.418	791.558	866.442	805.539	hfl1	organic solute transmembrane transporter (predicted)	I	1108567	1110110	+
SPBC4F6.08c	207.594	-0.207226	0.184536	-1.12295	0.261457	0.851818	221.051	223.895	196.919	188.51	mrpl39	mitochondrial ribosomal protein subunit L39 (predicted)	II	2700973	2701249	-
SPBC16H5.11c	775.467	0.123719	0.110382	1.12083	0.26236	0.85313	707.364	776.698	761.739	856.068	skb1	type II protein arginine N-methyltransferase Skb1	II	2277215	2279247	+
SPAC23G3.12c	1035.08	0.110819	0.0988479	1.12111	0.262241	0.85313	1048.11	943.133	1119.07	1030	htr12	serine protease, involved in lipid metabolism (predicted)	I	889130	892120	-
SPAC823.15	469.611	-0.146974	0.131105	-1.12104	0.262269	0.85313	491.704	495.343	473.565	417.831	ppa1	minor serine/threonine protein phosphatase Ppa1	I	2608103	2609032	+
SPAC22F8.03c	5.38327	1.32592	1.18438	1.1195	0.262925	0.85334	2.1566	3.96275	11.5269	3.8868	SPAC22F8.03c	Schizosaccharomyces pombe specific protein	I	4788494	4788895	-
SPBC36.04	1630.56	-0.0888905	0.0793947	-1.1196	0.262883	0.85334	1644.41	1716.86	1591.68	1569.3	cys11	cysteine synthase	II	847985	849185	+
SPAC29A4.17c	292.689	-0.18666	0.166734	-1.11951	0.262923	0.85334	319.177	304.141	303.543	243.897	SPAC29A4.17c	mitochondrial FUN14 family protein involved in mitophagy	I	5113142	5113696	+
SPCC576.19c	38.6533	0.469619	0.420255	1.11746	0.263797	0.855627	29.1141	35.6647	46.1078	43.7265	SPCC576.19c	dubious	III	2081247	2081606	-
SPBC29A3.13	398.265	-0.157146	0.140678	-1.11706	0.263967	0.855636	396.814	442.837	389.995	363.416	pdp1	PWWP domain protein Pdp1	II	2061103	2062182	-
SPAC15A10.05c	407.267	0.152854	0.136907	1.11648	0.264216	0.855899	372.013	399.247	437.063	420.746	mug182	NADHX epimerase (predicted)	I	3685760	3686721	-
SPAC31A2.14	620.633	0.136719	0.12282	1.11316	0.265639	0.85842	591.986	590.449	590.756	709.341	bun107	WD repeat protein, human WDR48 family Bun107	I	415406	418371	+
SPAC688.11	1627.41	0.0920334	0.0826821	1.1131	0.265666	0.85842	1539.81	1610.86	1610.89	1748.09	end4	Clathrin adaptor End4	I	3135125	3138433	+
SPBC30B4.02c	1121.45	-0.10471	0.0940246	-1.11365	0.26543	0.85842	1160.25	1164.06	1139.25	1022.23	sqs1	R3H and G-patch domain protein Sqs1 (predicted)	II	1301941	1304028	-
SPAC6G9.16c	296.897	-0.178246	0.160005	-1.114	0.265279	0.85842	294.376	335.843	285.292	272.076	xrc4	XRCC4 nonhomologous end joining factor Xrc4	I	3278951	3279985	-
SPAC6B12.14c	391.812	-0.153684	0.138247	-1.11166	0.266283	0.859873	416.223	409.153	379.429	362.444	SPAC6B12.14c	conserved fungal protein	I	2436999	2437463	-
SPAC19A8.05c	946.899	-0.113595	0.102248	-1.11098	0.266577	0.86028	945.668	1022.39	962.5	857.039	sst4	sorting receptor for ubiquitinated membrane proteins, ESCRT 0 complex subunit Sst4	I	2478119	2479951	+
SPCC663.05c	460.493	-0.150353	0.135472	-1.10984	0.267067	0.860774	489.548	479.492	473.565	399.369	cia1	histone H3-H4 chaperone Cia1	III	1643767	1644555	-
SPAC3A12.09c	140.209	-0.250532	0.225726	-1.1099	0.267044	0.860774	153.118	151.575	117.191	138.953	ure4	urease accessory protein UreD	I	1436590	1437462	-
SPCC338.02	9.13768	0.960583	0.86692	1.10804	0.267844	0.861649	6.46979	5.94412	13.4481	10.6887	mug112	Schizosaccharomyces pombe specific protein Mug112	III	1368882	1369259	-
SPAPB1E7.04c	914.292	0.115939	0.104623	1.10817	0.26779	0.861649	915.476	840.102	1009.57	892.02	SPAPB1E7.04c	chitinase (predicted)	I	3288801	3292511	-
SPAC23G3.09	913.725	0.109136	0.0984556	1.10848	0.267654	0.861649	904.693	853.972	968.264	927.973	taf4	transcription factor TFIID complex subunit Taf4 (predicted)	I	884445	885542	+
SPAC630.08c	2795.29	0.0802897	0.0724922	1.10756	0.26805	0.861771	2589	2845.25	2914.4	2832.51	erg25	C-4 methylsterol oxidase Erg25 (predicted)	I	360060	360962	-
SPBC17G9.03c	3404.86	0.0705383	0.0637985	1.10564	0.268882	0.862314	3285.58	3357.44	3475.37	3501.03	krs1	cytoplasmic lysine-tRNA ligase Krs1 (predicted)	II	2171857	2173632	-
SPAC25B8.13c	1430.67	-0.0973925	0.088089	-1.10561	0.268893	0.862314	1469.72	1488.01	1301.58	1463.38	isp7	2-OG-Fe(II) oxygenase superfamily protein	I	4180541	4181734	-
SPCC1795.05c	1156.29	-0.106849	0.0965578	-1.10658	0.268476	0.862314	1257.3	1141.27	1053.76	1172.84	ura6	uridylate kinase Ura6	III	988847	989422	+
SPAC1851.04c	724.419	-0.119541	0.108073	-1.10611	0.268681	0.862314	728.93	779.67	710.828	678.247	ric1	Ypt/Rab-specific guanyl-nucleotide exchange factor (GEF) subunit Ric1	I	4503683	4506841	-
SPCC191.08	221.876	0.200482	0.181427	1.10503	0.269147	0.862586	219.973	193.184	238.224	236.123	lto1	CIA machinery involved in ribosome biogenesis protein Lto1 (predicted)	III	1716751	1717155	+
SPBC365.13c	847.729	0.110458	0.100066	1.10385	0.26966	0.862608	830.29	800.475	888.536	871.615	hba1	Ran GTPase binding protein Hba1	II	2519571	2520770	-
SPAC3A11.07	4943.17	-0.0675226	0.0611673	-1.1039	0.269636	0.862608	5133.78	4984.14	4704.92	4949.84	nde1	external mitochondrial NADH dehydrogenase (ubiquinone) Nde1/Nde2 (predicted)	I	3457273	3458928	+
SPBC3H7.18	166.199	-0.22817	0.20661	-1.10435	0.269441	0.862608	169.293	189.221	150.811	155.472	tam8	Schizosaccharomyces specific protein Tam8	II	1864520	1864753	+
SPBC17G9.05	417.898	-0.150836	0.136804	-1.10257	0.270213	0.863838	420.537	458.688	382.31	410.057	rct1	cyclophilin family peptidyl-prolyl cis-trans isomerase, RRM-containing Rct1	II	2178034	2179332	+
SPCC126.10	842.523	-0.113575	0.103086	-1.10175	0.270572	0.864445	916.554	835.149	795.359	823.03	iah1	isoamyl acetate hydrolytic enzyme Iah1 (predicted)	III	2134702	2135442	+
SPAC631.01c	1382.03	-0.0959381	0.0871423	-1.10094	0.270924	0.86503	1478.35	1378.04	1381.31	1290.42	acp2	F-actin capping protein beta subunit Acp2	I	2104197	2105249	-
SPBC8E4.12c	124.249	0.267561	0.243399	1.09927	0.271652	0.866272	103.517	121.854	122.954	148.67	ecl3	extender of the chronological lifespan protein Ecl3	II	4441340	4441609	-
SPAC1F5.03c	1356.42	0.104369	0.0949312	1.09942	0.271585	0.866272	1215.24	1398.85	1469.69	1341.92	SPAC1F5.03c	FAD-dependent oxidoreductase involved in late endosome to Golgi transport (predicted)	I	289952	291301	+
SPCPB16A4.04c	350.738	0.164021	0.149474	1.09733	0.272499	0.868431	355.839	306.122	371.744	369.246	trm8	tRNA (guanine-N7-)-methyltransferase catalytic subunit Trm8 (predicted)	III	951193	952204	-
SPBC19G7.02	238.643	0.194181	0.177096	1.09647	0.272872	0.869078	224.286	220.923	235.342	274.019	abz2	4-amino-4-deoxychorismate lyase Abz2 (predicted)	II	2348284	2349112	+
SPAC31G5.19	509.005	-0.136126	0.124227	-1.09578	0.273175	0.869501	522.975	542.896	469.723	500.425	abo1	ATPase with bromodomain protein	I	3024418	3027990	+
SPBP35G2.05c	978.772	0.103573	0.0947108	1.09357	0.274146	0.869713	953.216	934.217	1031.66	995.992	cki2	serine/threonine protein kinase Cki2	II	970957	972448	-
SPCC757.09c	1090.17	0.098951	0.0906455	1.09163	0.274997	0.869713	1067.52	1038.24	1123.88	1131.06	rnc1	KH domain RNA-binding protein Rnc1	III	65489	66685	-
SPBC28F2.11	2320.34	-0.0780789	0.0713825	-1.09381	0.274038	0.869713	2391.67	2374.68	2306.35	2208.67	hmo1	upstream binding transcription factor, RNA polymerase I specific, Hmo1	II	1589359	1590483	+
SPBC1718.04	1471.33	-0.0902197	0.0825346	-1.09311	0.274344	0.869713	1527.95	1506.83	1462.96	1387.59	sct1	glycerol-3-phosphate O-acyltransferase Sct1/Gpt1 (predicted)	II	3475916	3477995	+
SPAC2F7.13c	1571.86	-0.0931045	0.0850808	-1.09431	0.27382	0.869713	1536.58	1707.94	1547.49	1495.45	wrs1	cytoplasmic tryptophan-tRNA ligase Wrs1 (predicted)	I	559317	560504	-
SPAC13C5.04	1086.31	-0.100326	0.0919271	-1.09137	0.275112	0.869713	1125.74	1122.45	1080.65	1016.4	SPAC13C5.04	class I glutamine amidotransferase family protein, conserved in fungi, bacteria, plants	I	430130	430876	+
SPCC1494.04c	714.017	-0.117871	0.107748	-1.09395	0.273975	0.869713	720.304	765.8	682.972	686.992	tyr1	prephenate dehydrogenase Tyr1	III	2327154	2328548	-
SPBC29A10.15	572.083	-0.127655	0.116929	-1.09173	0.274952	0.869713	597.378	597.384	552.333	541.237	orc1	origin recognition complex subunit Orc1	II	2571162	2573337	+
SPBC2F12.13	619.223	-0.14022	0.128329	-1.09266	0.274545	0.869713	684.72	614.225	650.312	527.633	klp5	kinesin-8 family plus-end directed microtubule motor Klp5	II	1709214	1711921	-
SPAC7D4.05	481.765	-0.144772	0.132234	-1.09482	0.273597	0.869713	545.619	466.613	463.96	450.869	SPAC7D4.05	HAD superfamily hydrolase, unknown role	I	2629373	2630183	-
SPBC577.05c	16.5921	-0.713273	0.653103	-1.09213	0.274776	0.869713	19.4094	21.7951	8.64521	16.5189	rec27	meiotic recombination protein Rec27	II	757566	758042	-
SPCC757.06	29.0634	0.526542	0.483152	1.08981	0.275798	0.869762	25.8792	21.7951	35.5414	33.0378	SPCC757.06	Schizosaccharomyces pombe specific protein, similar to a region of alpha-galactosidase	III	55579	56029	+
SPAC1D4.10	472.893	0.149359	0.137017	1.09007	0.27568	0.869762	455.042	441.846	448.59	546.095	trz1	nuclear 3'-tRNA processing endonuclease tRNAse Z, Trz1	I	653774	656240	+
SPBC336.01	546.788	0.130953	0.120206	1.0894	0.275977	0.869762	535.915	508.222	561.939	581.077	fbh1	DNA helicase I, ubiquitin ligase F-box adaptor Fbh1	II	2733296	2735972	+
SPBC557.03c	1469.06	0.0926851	0.0850297	1.09003	0.275699	0.869762	1365.13	1478.1	1481.21	1551.8	pim1	RCC1 family Ran GEF	II	2489034	2490828	-
SPBC1347.01c	262.646	-0.183158	0.168087	-1.08966	0.275862	0.869762	292.219	266.495	235.342	256.529	rev1	deoxycytidyl transferase Rev1 (predicted)	II	4061351	4064158	-
SPBC119.06	672.003	0.1307	0.120096	1.0883	0.276464	0.870244	623.257	659.797	765.581	639.379	sco1	mitochondrial copper chaperone for cytochrome c oxidase Sco1 (predicted)	II	723759	724550	+
SPAC4G9.12	3319.29	-0.0729674	0.0670482	-1.08828	0.276471	0.870244	3302.83	3503.07	3294.79	3176.49	idn1	gluconokinase	I	2277199	2277780	+
SPAC23H4.15	376.345	0.15442	0.141972	1.08768	0.276735	0.870489	340.743	371.507	400.561	392.567	tsr1	ribosome biogenesis protein Tsr1 (predicted)	I	1579756	1582107	-
SPAC139.02c	1441.46	0.0889844	0.0818371	1.08734	0.276889	0.870489	1407.18	1386.96	1490.82	1480.87	oac1	mitochondrial carrier, ocaloacetate family anion (predicted)	I	1019612	1020574	-
SPCC63.07	168.05	0.22658	0.208993	1.08415	0.278298	0.870913	169.293	140.677	186.352	175.878	thg1	tRNAHis guanylyltransferase Thg1 (predicted)	III	848634	849629	+
SPCC663.11	191.251	0.214782	0.198313	1.08305	0.278787	0.870913	189.781	164.454	190.195	220.576	saf1	splicing associated factor Saf1	III	1653876	1654712	+
SPCC330.09	357.333	0.158442	0.146057	1.08479	0.278014	0.870913	353.682	321.973	366.941	386.737	enp2	rRNA processing protein Enp2 (predicted)	III	127294	129198	+
SPCC553.03	381.101	0.154532	0.142613	1.08357	0.278554	0.870913	354.76	366.554	379.429	423.661	pex1	AAA family ATPase Pex1 (predicted)	III	302352	305210	-
SPAC12G12.13c	532.2	0.134073	0.123568	1.08502	0.277914	0.870913	520.818	494.352	582.111	531.52	cid14	TRAMP complex poly(A) polymerase subunit Cid14	I	321924	323978	+
SPAC1851.03	1300.75	0.0997314	0.091974	1.08434	0.278212	0.870913	1191.52	1319.59	1402.45	1289.45	ckb1	CK2 family regulatory subunit Ckb1	I	4502408	4503387	+
SPBC337.13c	466.663	-0.140825	0.12992	-1.08393	0.278394	0.870913	502.487	476.52	462.038	425.605	gtr1	Gtr1/RagA G protein Gtr1	II	1053778	1054704	-
SPAC644.05c	391.478	-0.150776	0.139247	-1.0828	0.278897	0.870913	408.675	415.098	356.375	385.765	dut1	deoxyuridine 5'-triphosphate nucleotidohydrolase (predicted)	I	2678627	2679049	-
SPBC13G1.03c	336.46	-0.15998	0.147518	-1.08448	0.278153	0.870913	351.525	358.628	318.912	316.774	pex14	peroxisomal docking protein Pex14 (predicted)	II	3731432	3732352	-
SPAC1039.03	341	-0.164493	0.151466	-1.08601	0.277476	0.870913	333.194	387.358	319.873	323.576	SPAC1039.03	esterase/lipase, implicated in cellular detoxification (predicted)	I	5452729	5453754	+
SPAC16A10.08c	136.096	-0.244277	0.225511	-1.08321	0.278714	0.870913	145.57	149.594	127.757	121.462	mug74	Schizosaccharomyces specific protein Mug74	I	3093973	3094885	-
SPBC1709.01	130.623	0.276511	0.255524	1.08213	0.279194	0.871311	144.492	92.1338	151.771	134.095	chs2	chitin synthase homolog Chs2	II	1095358	1098185	+
SPBC1861.01c	442.057	0.142268	0.131727	1.08003	0.280131	0.871617	434.555	406.181	461.078	466.416	cnp3	CENP-C ortholog Cnp3	II	4126370	4128568	-
SPCC1223.05c	1150.31	0.110011	0.101862	1.08	0.280144	0.871617	1024.38	1187.83	1124.84	1264.18	rpl3702	60S ribosomal protein L37 (predicted)	III	1847518	1847853	-
SPBC1773.10c	3054.71	-0.0738207	0.0683021	-1.0808	0.279788	0.871617	3114.13	3151.37	2875.01	3078.35	nrs1	cytoplasmic asparagine-tRNA ligase Nrs1 (predicted)	II	301982	303688	-
SPAC17G6.11c	230.084	-0.189837	0.175764	-1.08007	0.280113	0.871617	243.696	246.681	211.327	218.632	SPAC17G6.11c	sphingolipid biosynthesis protein (predicted)	I	3607829	3609739	-
SPCC1235.17	40.1154	-0.455416	0.421134	-1.0814	0.279518	0.871617	44.2103	48.5436	26.8962	40.8114	SPCC1235.17	dubious	III	209313	209765	-
SPBC21C3.12c	619.51	-0.125624	0.116365	-1.07956	0.280337	0.871686	648.058	644.937	624.376	560.671	SPBC21C3.12c	thioredoxin family protein, peroxidase	II	3817041	3817415	-
SPBC18H10.08c	281.627	0.172903	0.160277	1.07878	0.280688	0.871718	262.027	267.485	303.543	293.453	ubp4	ubiquitin C-terminal hydrolase Ubp4	II	1784219	1786248	-
SPAC343.10	1083.54	-0.102851	0.0953395	-1.07879	0.280681	0.871718	1086.93	1157.12	1093.14	996.964	met11	methylenetetrahydrofolate reductase Met11	I	1656239	1658164	+
SPAC1A6.04c	28166.7	-0.0644417	0.0597895	-1.07781	0.281119	0.872525	28462.8	29128.2	26012.5	29063.5	plb1	phospholipase B homolog Plb1	I	1074777	1076618	-
SPAC977.03	3.19939	1.62808	1.51773	1.07271	0.283403	0.872533	2.1566	0.990686	5.76347	3.8868	SPAC977.03	methyltransferase (predicted)	I	33835	34272	+
SPBC24C6.02	246.181	0.183899	0.170857	1.07633	0.28178	0.872533	237.226	223.895	264.159	259.444	spb4	ATP-dependent RNA helicase Spb4 (predicted)	II	2320383	2322332	+
SPAC30C2.06c	285.676	0.177415	0.165099	1.0746	0.282556	0.872533	243.696	292.252	299.701	307.057	dml1	mitochondrial inheritance GTPase, tubulin-like (predicted)	I	4640742	4642139	-
SPAC17A5.10	287.695	0.171448	0.15941	1.07552	0.282144	0.872533	272.81	268.476	315.07	294.425	hua1	conserved fungal protein, possibly DNA J domain Hua1	I	1770191	1770865	+
SPAC18G6.06	505.362	0.133924	0.124786	1.07323	0.283169	0.872533	473.373	490.39	546.569	511.114	utp11	U3 snoRNP-associated protein Utp11 (predicted)	I	2229015	2229764	+
SPAC19G12.02c	993.277	0.102165	0.0948314	1.07733	0.281331	0.872533	939.198	976.817	1006.69	1050.41	pms1	MutL family mismatch-repair protein Pms1	I	4044900	4047498	-
SPAC1639.01c	2526.36	0.0820297	0.076398	1.07372	0.28295	0.872533	2585.76	2324.15	2531.13	2664.4	elo1	fatty acid elongase Elo1	I	251726	253714	-
SPBC646.09c	3035.85	0.0743266	0.0690556	1.07633	0.28178	0.872533	2870.43	3044.38	3191.04	3037.53	int6	translation initiation factor eIF3e	II	938700	940261	-
SPAC959.07	5969.4	0.0613074	0.0570584	1.07447	0.282613	0.872533	5775.37	5909.44	6052.61	6140.17	rps403	40S ribosomal protein S4 (predicted)	I	3399256	3400044	+
SPAC3G9.06	2079.8	-0.0788423	0.0734976	-1.07272	0.283397	0.872533	2098.37	2174.56	2002.81	2043.48	frs2	cytoplasmic phenylalanine-tRNA ligase alpha subunit Frs2 (predicted)	I	3171584	3173345	-
SPBC31F10.06c	2031.63	-0.0812465	0.0756754	-1.07362	0.282994	0.872533	2016.42	2160.69	1978.79	1970.61	sar1	ADP-ribosylation factor Sar1	II	3760951	3761829	-
SPAC23H4.12	840.818	-0.10878	0.101072	-1.07626	0.281809	0.872533	856.169	888.646	789.596	828.86	alp13	MRG family Clr6 histone deacetylase complex subunit Alp13	I	1587489	1588551	-
SPBC1709.08	608.888	-0.122667	0.114347	-1.07276	0.283381	0.872533	640.51	629.086	594.598	571.36	cft1	mRNA cleavage and polyadenylation specificity factor complex, WD repeat protein Cft1	II	1113339	1117664	+
SPAPB18E9.01	460.269	-0.143974	0.134246	-1.07247	0.283509	0.872533	480.921	485.436	403.443	471.274	trm5	tRNA (guanine(37)-N(1))-methyltransferase activity Trm5 (predicted)	I	3974310	3976079	+
SPAC18G6.14c	8318.87	0.05746	0.0536411	1.07119	0.284082	0.873771	8128.22	8178.12	8448.29	8520.84	rps7	40S ribosomal protein S7 (predicted)	I	2241936	2242523	-
SPBC28E12.02	283.623	0.171592	0.160336	1.07021	0.284526	0.87461	262.027	271.448	292.016	309.001	SPBC28E12.02	RNA-binding protein, Human BICC1 ortholog	II	1836327	1838318	+
SPCC1795.12c	184.755	0.20808	0.194762	1.06838	0.285347	0.876068	172.528	170.398	198.84	197.255	SPCC1795.12c	Schizosaccharomyces specific protein	III	972824	973162	+
SPBC2D10.14c	495.228	0.142128	0.132991	1.0687	0.285204	0.876068	512.192	429.958	502.383	536.378	myo51	myosin type V	II	2990305	2994814	-
SPCC622.15c	616.08	0.121682	0.113933	1.06801	0.285514	0.876068	588.751	591.44	627.258	656.869	SPCC622.15c	Schizosaccharomyces specific protein	III	1429106	1430779	-
SPAC23H4.17c	243.396	0.183557	0.171937	1.06758	0.285709	0.876139	219.973	235.783	259.356	258.472	srb10	mediator complex, cyclin-dependent protein kinase subunit Srb10	I	1576854	1578028	+
SPAC222.07c	586.893	-0.128076	0.12003	-1.06703	0.285956	0.876373	642.666	583.514	583.071	538.322	hri2	eIF2 alpha kinase Hri2	I	954355	956474	-
SPBC1709.07	517.923	0.144341	0.135458	1.06558	0.286615	0.877379	504.644	479.492	484.132	603.426	erg27	3-keto sterol reductase Erg27 (predicted)	II	1110890	1112001	+
SPBC3E7.07c	460.89	-0.136601	0.128198	-1.06555	0.286628	0.877379	480.921	484.446	438.985	439.208	SPBC3E7.07c	DUF757 family protein, human PBDC1 ortholog	II	2671959	2672744	-
SPAC25B8.05	195.981	0.201781	0.189472	1.06496	0.286892	0.877664	183.311	181.296	207.485	211.831	deg1	tRNA-pseudouridine synthase Deg1 (predicted)	I	4162800	4164152	+
SPCC645.10	408.555	0.144567	0.135808	1.06449	0.287105	0.87779	397.892	378.442	430.339	427.548	cca2	ATP 3'tRNA nucleotidyltransferase Cca2	III	1255280	1256793	+
SPAC3G6.10c	100.116	0.290166	0.272733	1.06392	0.287366	0.878064	81.9507	98.0779	96.0579	124.378	vps51	GARP complex subunit Vps51 (predicted)	I	5397600	5398079	-
SPAC922.04	6470.73	0.0682541	0.0641932	1.06326	0.287664	0.878449	5986.72	6647.5	6668.34	6580.35	SPAC922.04	Schizosaccharomyces specific protein	I	5479978	5480331	+
SPBC36.13	54.0965	0.390027	0.367113	1.06242	0.288047	0.878569	42.0537	51.5157	50.9107	71.9058	NA	NA	NA	NA	NA	NA
SPCC1672.08c	1097.48	-0.0970175	0.0913104	-1.0625	0.288008	0.878569	1121.43	1147.21	1087.38	1033.89	tfa2	transcription factor TFIIE beta subunit, TFIIEB, Tfa2	III	579456	580313	-
SPAC13G6.03	735.413	-0.112687	0.106151	-1.06158	0.288428	0.878683	777.454	750.94	720.434	692.822	gpi7	GPI anchor biosynthesis protein Gpi7 (predicted)	I	177292	179568	+
SPAC926.03	458.941	-0.139114	0.131004	-1.06191	0.288277	0.878683	504.644	457.697	431.3	442.123	rlc1	myosin II regulatory light chain Rlc1	I	3887570	3888124	+
SPBC839.06	160.475	0.226591	0.213545	1.06109	0.288648	0.878757	154.197	141.668	158.496	187.538	cta3	P-type ATPase, potassium exporting Cta3	II	608171	611284	+
SPCPB16A4.02c	871.277	-0.106695	0.100583	-1.06077	0.288796	0.878757	929.494	877.748	861.639	816.228	opy1	pleckstrin homology domain protein Opy1	III	944872	946260	-
SPAC25B8.02	409.549	-0.146404	0.138083	-1.06026	0.289026	0.878933	436.711	424.014	410.167	367.303	sds3	Clr6 histone deacetylase complex subunit Sds3	I	4156539	4157342	+
SPAC17G8.09	134.212	0.242389	0.229137	1.05783	0.290132	0.881774	125.083	120.864	136.402	154.5	shg1	Set1C complex subunit Shg1	I	2357361	2357931	+
SPAC7D4.09c	184.774	-0.206961	0.195738	-1.05734	0.290356	0.88193	204.877	191.202	167.141	175.878	dfg10	3-oxo-5-alpha-steroid 4-dehydrogenase (predicted)	I	2622666	2623490	+
SPBC2A9.10	119.023	0.254499	0.240886	1.05651	0.290736	0.882559	112.143	105.013	127.757	131.179	SPBC2A9.10	Bin3 family, 7SK RNA methyltransferase (predicted)	II	2964227	2965075	+
SPAC19B12.13	123.923	0.256178	0.242576	1.05608	0.290934	0.882567	124.004	102.041	125.836	143.812	cox1102	cytochrome c oxidase assembly protein Cox1102/ mitochondrial ribosomal protein Rsm2202, fusion protein (predicted)	I	4906978	4909239	+
SPBC4.07c	2901.81	-0.0716788	0.0678938	-1.05575	0.291083	0.882567	2931.9	3015.65	2894.22	2765.46	rpt2	19S proteasome base subcomplex ATPase subunit Rpt2	II	1197898	1199379	-
SPCC1450.08c	20.1574	-0.611079	0.579126	-1.05517	0.291346	0.882839	26.9575	21.7951	16.3298	15.5472	wtf16	wtf element Wtf16	III	1739338	1740648	-
SPBP4H10.12	1353.23	-0.0902189	0.0855333	-1.05478	0.291526	0.882862	1421.2	1370.12	1347.69	1273.9	SPBP4H10.12	protein with a role in ER insertion of tail-anchored membrane proteins (predicted)	II	2895855	2896587	+
SPAC11E3.15	7365.43	0.0626523	0.0594224	1.05435	0.29172	0.882929	6958.26	7451.94	7647.17	7404.35	rpl22	60S ribosomal protein L22 (predicted)	I	5314862	5315317	+
SPAC22F3.05c	115.777	0.258845	0.245875	1.05275	0.292455	0.884037	107.83	103.031	118.151	134.095	alp41	GTP-binding protein involved in beta-tubulin folding Alp41	I	697291	698068	+
SPBC725.07	331.417	0.158571	0.150889	1.05092	0.293296	0.884037	308.394	318.01	366.941	332.321	pex5	peroxisomal targeting signal receptor Pex5 (predicted)	II	1217019	1218815	+
SPAC25B8.09	585.61	0.122812	0.116633	1.05298	0.292351	0.884037	545.619	575.589	604.204	617.029	SPAC25B8.09	trans-aconitate 3-methyltransferase (predicted)	I	4170714	4171469	+
SPBC1289.10c	675.93	0.121858	0.115939	1.05106	0.293233	0.884037	630.805	663.76	655.115	754.039	adn2	DNA-binding transcription factor Adn2 (predicted)	II	4400616	4402847	-
SPAC3G6.13c	1893.17	-0.0977936	0.093043	-1.05106	0.293232	0.884037	1798.6	2115.12	1717.52	1941.46	rpl4101	60S ribosomal protein L41	I	5402104	5402233	-
SPAC17G8.02	332.611	-0.167733	0.159443	-1.05199	0.292804	0.884037	347.212	356.647	349.651	276.934	urh2	uridine ribohydrolase Urh2 (predicted)	I	2344815	2345807	+
SPAC1250.07	232.273	-0.185166	0.175944	-1.05241	0.292611	0.884037	242.617	251.634	209.406	225.434	sfc7	transcription factor TFIIIC subunit Sfc7 (predicted)	I	5097850	5098212	-
SPCC1322.15	633.424	0.123971	0.118115	1.04958	0.29391	0.884845	650.214	562.71	651.273	669.501	rpl3402	60S ribosomal protein L34	III	1321587	1321922	+
SPAC167.09	215.609	-0.190109	0.181122	-1.04961	0.293896	0.884845	230.756	228.849	204.603	198.227	pga1	GPI-mannosyltransferase II complex subunit Pga1 (predicted)	I	1558670	1559301	+
SPAC26F1.05	43.8714	-0.410158	0.391257	-1.04831	0.294497	0.886091	49.6018	50.525	37.4626	37.8963	mug106	Schizosaccharomyces pombe specific protein Mug106	I	5174979	5175326	-
SPBC1604.21c	3136.16	-0.073245	0.0698984	-1.04788	0.294695	0.886165	3230.58	3200.91	2920.16	3193.01	ptr3	ubiquitin activating enzyme E1	II	3888696	3891900	+
SPCC63.11	526.734	-0.128483	0.122685	-1.04726	0.294981	0.886503	558.559	541.905	521.594	484.878	prp28	U5 snRNP-associated ATP-dependent RNA helicase Prp28 (predicted)	III	857153	859141	+
SPBP4H10.21c	501.155	-0.132753	0.126836	-1.04665	0.295261	0.886822	528.367	520.11	504.304	451.84	sld5	GINS complex subunit Sld5	II	2913576	2914220	-
SPBC1347.04	597.409	-0.124328	0.118844	-1.04615	0.295493	0.886999	594.143	651.872	593.638	549.982	tim54	TIM22 inner membrane protein insertion complex subunit Tim54 (predicted)	II	4068030	4069073	+
SPAC630.10	419.099	0.158184	0.151276	1.04566	0.295717	0.887152	442.103	350.703	476.447	407.142	bmt2	rRNA (adenine) methyltransferase activity Bmt2 (predicted)	I	365550	366362	+
SPBPJ4664.05	782.562	-0.111469	0.106639	-1.04529	0.295891	0.887152	802.255	823.26	792.478	712.256	SPBPJ4664.05	endomembrane system protein, FAR-17a/AIG1-like family protein, human AIG1 and ADTRP ortholog	II	705932	706666	+
SPAC21E11.05c	402.287	0.146772	0.140539	1.04436	0.29632	0.8874	404.362	359.619	438.024	407.142	cyp8	cyclophilin family peptidyl-prolyl cis-trans isomerase Cyp8	I	4255729	4257484	-
SPBC29A3.01	575.07	0.126281	0.120898	1.04452	0.296245	0.8874	579.047	521.101	580.19	619.945	ccc2	Golgi copper transporting ATPase Ccc2 (predicted)	II	2037987	2040701	+
SPAC22E12.19	276.066	0.1795	0.17205	1.0433	0.296809	0.887909	280.358	237.765	317.952	268.189	snt1	Set3 complex subunit Snt1	I	5056708	5058693	+
SPAPB1E7.01c	458.842	0.147252	0.141402	1.04137	0.297706	0.887909	483.078	388.349	502.383	461.557	SPAPB1E7.01c	DUF3245 nucleolar protein, conserved in fungi and plant family	I	3282214	3282705	-
SPAC1486.03c	823.529	0.113982	0.109345	1.04241	0.297222	0.887909	778.532	803.447	923.116	789.02	ntr1	RNA-binding splicing factor Ntr1	I	3188398	3190791	-
SPAC25B8.11	1350.39	-0.0932751	0.0895153	-1.042	0.297411	0.887909	1394.24	1393.9	1383.23	1230.17	SPAC25B8.11	DNA-binding transcription factor (predicted)	I	4174059	4176069	+
SPAC9E9.15	702.862	-0.116335	0.111703	-1.04147	0.297659	0.887909	706.286	755.894	707.947	641.322	SPAC9E9.15	mitochondrial protein complex assembly protein (predicted)	I	4470681	4471340	+
SPBC2G5.04c	600.308	-0.119856	0.114977	-1.04244	0.297209	0.887909	638.353	612.244	575.387	575.246	erv41	COPII-coated vesicle component Erv41 (predicted)	II	2583234	2584235	-
SPACUNK4.12c	583.287	-0.122493	0.117483	-1.04265	0.297113	0.887909	630.805	585.496	556.175	560.671	iph1	insulinase pombe homologue 1	I	2887039	2889948	+
SPCC1020.08	863.969	0.105708	0.1016	1.04043	0.298139	0.888166	861.561	803.447	921.195	869.671	tyw1	wybutosine biosynthesis protein Tyw1 (predicted)	III	767986	770052	-
SPBC27.08c	6695.2	-0.0630126	0.0605422	-1.0408	0.297966	0.888166	6602.43	7079.44	6427.23	6671.69	sua1	sulfate adenylyltransferase	II	1571485	1572957	-
SPAC1639.02c	754.544	0.133897	0.128822	1.0394	0.29862	0.888564	753.731	685.555	682.011	896.879	trk2	plasma membrane potassium ion transmembrane transporter Trk2	I	256030	259461	-
SPAC823.11	927.483	-0.104003	0.100045	-1.03956	0.298545	0.888564	989.879	932.236	932.722	855.096	sgp1	sphingosine-1-phosphate phosphatase	I	2598325	2599668	+
SPBC1685.17	118.467	0.258489	0.249771	1.0349	0.300714	0.889646	106.752	108.975	112.388	145.755	SPBC1685.17	Schizosaccharomyces pombe specific protein	II	522740	522985	+
SPBC16C6.12c	175.496	0.210671	0.203156	1.03699	0.29974	0.889646	149.884	175.351	191.155	185.595	las1	Las1 pre-rRNA processing protein	II	4352663	4354075	-
SPCC553.11c	358.35	0.14907	0.143958	1.03551	0.300431	0.889646	342.899	336.833	367.902	385.765	toa2	transcription factor TFIIA complex small subunit Toa2 (predicted)	III	281902	282410	+
SPBC1289.13c	570.664	0.127364	0.122877	1.03652	0.299961	0.889646	539.15	551.812	637.824	553.869	gmh6	alpha-1,2-galactosyltransferase Gmh6	II	4408061	4409188	-
SPBC3E7.10	590.44	0.120249	0.115989	1.03673	0.29986	0.889646	579.047	552.803	609.968	619.945	fma1	methionine aminopeptidase Fma1 (predicted)	II	2678873	2680173	+
SPBC25H2.09	769.483	0.108426	0.104747	1.03512	0.300611	0.889646	717.069	763.819	792.478	804.567	mic19	MICOS complex subunit Mic19/25	II	3268891	3269379	-
SPCC550.15c	976.413	0.101654	0.0980181	1.03709	0.299693	0.889646	990.957	893.599	1010.53	1010.57	rei1	ribosome biogenesis protein Rei1 (predicted)	III	1221616	1223007	-
SPBC947.14c	702.721	-0.112637	0.108674	-1.03646	0.299986	0.889646	746.183	714.285	692.577	657.841	cbp6	mitochondrial Cob1 translation regulator Cbp6 (predicted)	II	644291	644669	+
SPCC285.12	735.365	-0.114023	0.110119	-1.03546	0.300456	0.889646	742.948	785.614	667.602	745.294	lsm7	Lsm2-8 complex Lsm7 (predicted)	III	1818424	1818819	+
SPBC1198.01	236.194	-0.191366	0.184915	-1.03488	0.300723	0.889646	235.069	268.476	244.948	196.283	fmd2	glutathione-dependent formaldehyde dehydrogenase Fmd2	II	172991	174262	+
SPAC6G10.06	132.588	0.239413	0.231888	1.03245	0.30186	0.890251	129.396	113.929	135.442	151.585	tda3	FAD-dependent amino acid oxidase involved in late endosome to Golgi transport Tda3 (predicted)	I	3226929	3228192	+
SPCC297.04c	184.301	0.21017	0.206935	1.01563	0.309804	0.890251	170.371	171.389	170.983	224.463	set7	histone lysine H3-K37 methyltransferase Set7	III	1881316	1882072	-
SPAC821.09	258.873	0.188244	0.182987	1.02873	0.303605	0.890251	209.19	274.42	255.514	296.368	eng1	cell septum surface endo-1,3-beta-glucanase Eng1	I	998953	1002003	+
SPBC17D1.07c	223.856	0.185147	0.180184	1.02755	0.304164	0.890251	221.051	198.137	243.026	233.208	npg1	GTPase regulator Rng2-like (predicted)	II	3340725	3343918	-
SPBC16D10.01c	260.136	0.173823	0.169712	1.02423	0.305729	0.890251	252.322	236.774	292.977	258.472	SPBC16D10.01c	TPR repeat protein, conserved fungal protein	II	3587478	3588488	-
SPCC338.11c	303.959	0.160972	0.157466	1.02226	0.306656	0.890251	299.767	274.42	307.385	334.265	efm2	elongation factor EF2/EF3 methyltransferase lysine methyltransferase Efm2 (predicted)	III	1356326	1357237	+
SPBC947.11c	333.138	0.152653	0.148624	1.02711	0.304367	0.890251	317.02	314.048	342.927	358.557	elg1	DNA replication factor C complex subunit Elg1	II	649980	652833	+
SPBC3H7.09	385.817	0.149344	0.146296	1.02084	0.307331	0.890251	389.266	342.777	432.261	378.963	erf2	palmitoyltransferase Erf2	II	1866397	1867449	-
SPCC417.07c	426.154	0.136622	0.133468	1.02362	0.306013	0.890251	410.832	401.228	457.236	435.322	mto1	gamma tubulin complex linker Mto1	III	1679924	1683271	-
SPBC2G2.08	457.287	0.135469	0.131871	1.02728	0.304286	0.890251	422.693	448.781	456.275	501.397	ade9	C-1-tetrahydrofolatesynthase/methylenetetrahydrof olatedehydrogenase/methylenetetrahydrofolatecyclohydrolase/ formyltetrahydrofolatesynthetase Ade9	II	3448967	3452152	+
SPCC61.04c	570.188	0.134974	0.131999	1.02254	0.306527	0.890251	568.264	519.12	660.878	532.492	SPCC61.04c	Rab GTPase binding (predicted)	III	1446343	1447377	-
SPAC1F12.05	446.356	0.134226	0.130428	1.02912	0.303423	0.890251	430.241	421.042	474.526	459.614	any2	arrestin-related endocytic adaptor Any2 (predicted)	I	3813122	3814255	+
SPAC144.05	529.317	0.134024	0.130511	1.02691	0.304461	0.890251	512.192	497.325	502.383	605.369	SPAC144.05	DNA-dependent ATPase/ ubiquitin-protein ligase E3 (predicted)	I	4659256	4663543	+
SPAC3G9.13c	499.128	0.128706	0.126119	1.02051	0.307485	0.890251	485.235	468.595	499.501	543.18	msw1	mitochondrial tryptophan-tRNA ligase Msw1 (predicted)	I	3151326	3152782	+
SPCC1235.05c	529.956	0.124083	0.122083	1.01638	0.309447	0.890251	511.114	503.269	534.082	571.36	fft2	SMARCAD1 family ATP-dependent DNA helicase Fft2 (predicted)	III	183023	186877	-
SPAC2C4.17c	709.573	0.1153	0.112806	1.02211	0.306727	0.890251	728.93	634.039	731.001	744.322	msy2	MS ion channel protein 2 (predicted)	I	4288401	4290923	-
SPBC3H7.07c	874.936	0.112535	0.1098	1.02491	0.305407	0.890251	807.646	873.785	984.593	833.718	ser2	phosphoserine phosphatase Ser2 (predicted)	II	1870334	1871301	+
SPAC1783.05	698.605	0.111603	0.109758	1.0168	0.309248	0.890251	696.581	646.918	740.606	710.313	hrp1	ATP-dependent DNA helicase Hrp1	I	2195017	2199138	+
SPCC1672.09	794.184	0.106445	0.103164	1.0318	0.302166	0.890251	742.948	786.605	826.098	821.086	SPCC1672.09	triglyceride lipase-cholesterol esterase (predicted)	III	580593	582195	+
SPBC6B1.07	789.183	0.105105	0.102782	1.0226	0.306497	0.890251	772.062	748.959	809.768	825.945	prp1	U4/U6 x U5 tri-snRNP complex subunit Prp1	II	2641990	2644710	+
SPAC22H10.11c	941.008	0.102122	0.0987591	1.03405	0.301111	0.890251	937.042	878.739	1007.65	940.605	crf1	transcriptional corepressor for ribosomal proteins via TOR signaling pathway Crf1 (predicted)	I	2392370	2394259	-
SPBC8D2.04	7538.75	0.0577469	0.0568491	1.01579	0.309728	0.890251	7258.03	7517.33	7841.21	7538.45	hht2	histone H3 h3.2	II	1365158	1365568	+
SPBC215.15	2383.42	-0.0743522	0.0723891	-1.02712	0.304364	0.890251	2393.82	2495.54	2384.16	2260.17	sec13	COPII-coated vesicle component Sec13	II	4060033	4061002	+
SPCC1682.10	2281.86	-0.0777747	0.0763495	-1.01867	0.308361	0.890251	2285.99	2400.43	2319.8	2121.22	rpn8	19S proteasome regulatory subunit Rpn8	III	390747	391765	+
SPCC737.09c	1628.24	-0.0803496	0.0784688	-1.02397	0.30585	0.890251	1664.89	1682.19	1585.92	1579.98	hmt1	vacuolar phytochelatin and glutathione S-conjugate ABC family transmembrane transporter Hmt1	III	1914928	1917542	-
SPBC337.07c	1563.43	-0.0818606	0.0805912	-1.01575	0.309748	0.890251	1620.68	1595	1553.26	1484.76	ecm14	carboxypeptidase Ecm14 (predicted)	II	1042295	1043959	-
SPAC664.03	1451.91	-0.0841645	0.0817493	-1.02954	0.303224	0.890251	1508.54	1480.09	1418.78	1400.22	paf1	RNA polymerase II associated Paf1 complex (predicted)	I	1708822	1710229	+
SPCC1672.05c	1920.82	-0.0845063	0.0825742	-1.0234	0.30612	0.890251	1937.7	2016.05	1751.14	1978.38	yrs1	cytoplasmic tyrosine-tRNA ligase Yrs1 (predicted)	III	570243	571448	-
SPCC576.04	1439.96	-0.0900668	0.0871974	-1.03291	0.301648	0.890251	1430.9	1538.54	1453.36	1337.06	bxi1	BAX inhibitor family protein Bxi1	III	2086877	2087677	+
SPBC19F8.03c	1235.66	-0.090408	0.0887212	-1.01901	0.308197	0.890251	1304.74	1244.3	1232.42	1161.18	yap18	ENTH/VHS domain protein (predicted)	II	3232304	3234299	-
SPBC146.07	1109.43	-0.0928188	0.0899462	-1.03194	0.302102	0.890251	1143	1147.21	1086.41	1061.1	prp2	U2 small nuclear RNA auxiliary factor small subunit, U2AF-59	II	1013555	1015108	+
SPBC1711.03	1012.08	-0.0953727	0.0932744	-1.0225	0.306546	0.890251	1030.85	1060.03	970.185	987.247	emc3	ER membrane protein complex subunit Emc3 (predicted)	II	2138363	2139476	+
SPAPB2B4.02	872.636	-0.101186	0.0986495	-1.02571	0.305028	0.890251	907.928	898.552	829.94	854.124	grx5	mitochondrial [2Fe-2S] cluster assembly and transfer glutaredoxin Grx5	I	2708097	2708869	+
SPAC31A2.03	973.273	-0.103075	0.101174	-1.01879	0.308302	0.890251	1066.44	950.068	902.944	973.643	mrp11	mitochondrial ribosomal protein subunit L11 (predicted)	I	389543	390245	+
SPAC9G1.11c	745.313	-0.106545	0.104707	-1.01756	0.308889	0.890251	769.906	775.707	717.552	718.086	spn4	mitotic septin Spn4	I	1991787	1992929	-
SPAPB1A10.04c	773.796	-0.111186	0.109031	-1.01977	0.307838	0.890251	850.778	756.884	768.463	719.058	cwp1	geranylgeranyltransferase I and farnesyltransferase alpha subunit Cwp1	I	1864673	1865608	-
SPAC23D3.06c	777.101	-0.11195	0.110143	-1.01641	0.309435	0.890251	785.002	829.204	695.459	798.737	nup146	nucleoporin, WD repeat Nup146	I	4346602	4350620	-
SPAC1610.02c	697.705	-0.11515	0.112695	-1.02178	0.306884	0.890251	742.948	708.341	709.868	629.662	mrpl1	mitochondrial ribosomal protein subunit L1 (predicted)	I	1791482	1792243	-
SPBP19A11.04c	649.278	-0.123241	0.121091	-1.01775	0.308795	0.890251	692.268	661.778	564.82	678.247	mor2	morphogenesis protein Mor2	II	2854650	2861240	-
SPAC2H10.02c	496.443	-0.12796	0.125213	-1.02194	0.306809	0.890251	519.74	517.138	459.157	489.737	nas2	26S proteasome regulatory particle assembly protein Nas2 (predicted)	I	5276195	5276907	-
SPBC115.02c	459.563	-0.13401	0.129997	-1.03087	0.302601	0.890251	500.331	461.66	438.024	438.237	afg1	AFG1 family mitochondrial ATPase/chaperone Afg1 (predicted)	II	637654	639018	+
SPBC23E6.02	467.642	-0.134841	0.132206	-1.01993	0.307761	0.890251	461.512	517.138	428.418	463.501	rrp2	ATP-dependent DNA helicase/ ubiquitin-protein ligase E3 (predicted)	II	3839637	3842759	+
SPBC21C3.11	539.782	-0.144277	0.140235	-1.02882	0.303563	0.890251	603.847	530.017	577.308	447.954	ubx4	UBX domain protein Ubx4 (predicted)	II	3815525	3816802	+
SPAC458.06	392.904	-0.144417	0.141654	-1.0195	0.307964	0.890251	384.953	439.865	373.665	373.133	atg1803	autophagy associated WD repeat protein Atg18c	I	4742869	4744167	+
SPAC1D4.03c	414.319	-0.144546	0.140584	-1.02818	0.303867	0.890251	444.259	425.995	424.576	362.444	aut12	autophagy associated protein Aut12 (predicted)	I	641885	643512	-
SPCP31B10.03c	343.988	-0.151158	0.147025	-1.02811	0.3039	0.890251	349.369	374.479	327.557	324.548	med31	mediator complex subunit Med31	III	526271	526690	-
SPAC2E1P3.02c	141.764	-0.229937	0.223188	-1.03024	0.302898	0.890251	158.51	147.612	122.954	137.981	amt3	plasma membrane ammonium transmembrane transporter Amt3	I	2924893	2926446	-
SPCC663.06c	102.738	-0.283676	0.275701	-1.02893	0.303515	0.890251	91.6554	133.743	87.4127	98.1417	osr1	short chain dehydrogenase, unknown specificity (predicted)	III	1645115	1645876	-
SPBC18H10.07	85.9009	-0.292426	0.287666	-1.01655	0.309369	0.890251	83.029	106.003	77.8069	76.7643	wbp4	U2-type precatalytic spliceosome WW domain-binding protein Wbp4 (predicted)	II	1783259	1784006	+
SPAC14C4.03	62.8742	-0.336862	0.330098	-1.02049	0.307495	0.890251	69.0111	71.3294	50.9107	60.2454	mek1	Cds1/Rad53/Chk2 family protein kinase Mek1	I	5231140	5232566	+
SPBC1348.01	0.786821	-3.14254	3.04411	-1.03234	0.301915	0.890251	2.1566	0.990686	0	0	SPBC1348.01	S. pombe specific DUF999 protein family 5	II	5451	6318	+
SPAC3G6.09c	927.429	-0.0978339	0.0964672	-1.01417	0.310503	0.891606	960.764	957.003	911.589	880.36	tps2	trehalose-phosphate synthase Tps2 (predicted)	I	5394646	5397195	-
SPAC1250.04c	68.9633	-0.31955	0.315165	-1.01391	0.310624	0.891606	80.8724	72.3201	64.3588	58.302	atl1	alkyltransferase-like protein Atl1	I	5097113	5097439	+
SPAC22A12.05	188.589	0.195977	0.193918	1.01062	0.3122	0.893293	168.215	183.277	201.722	201.142	rpc11	DNA-directed RNA polymerase III complex subunit Rpc11	I	1163123	1163452	+
SPAC806.02c	610.002	0.116282	0.115079	1.01045	0.312278	0.893293	569.342	601.347	647.43	621.888	SPAC806.02c	CIA machinery CIA1/CFD1 fusion protein (predicted)	I	233231	235106	-
SPAC694.05c	5424.33	-0.0721234	0.0712914	-1.01167	0.311696	0.893293	5195.24	5923.31	5132.37	5446.38	rps2502	40S ribosomal protein S25 (predicted)	I	4208475	4208847	-
SPBC3E7.05c	1394.62	-0.0849255	0.0840231	-1.01074	0.312141	0.893293	1470.8	1400.83	1370.75	1336.09	mic60	MICOS complex subunit Mic60 (predicted)	II	2665666	2667395	-
SPAC17A2.06c	878.139	-0.102519	0.101504	-1.01	0.312495	0.893293	953.216	865.86	855.876	837.605	vps8	CORVET complex WD repeat Vps8 (predicted)	I	3563011	3566829	-
SPAC13C5.07	516.813	-0.13054	0.129278	-1.00976	0.312609	0.893293	584.438	496.334	486.053	500.425	mre11	Mre11 nuclease	I	436214	438369	+
SPBC31E1.05	352.802	-0.150489	0.148844	-1.01105	0.311991	0.893293	397.892	344.759	333.321	335.236	gle1	RNA export factor, cytoplasmic nucleoporin Gle1	II	247261	248753	+
SPBC26H8.14c	255.202	-0.172479	0.170427	-1.01204	0.311521	0.893293	253.4	287.299	243.987	236.123	cox17	mitochondrial copper chaperone for cytochrome c oxidase Cox17 (predicted)	II	3961943	3962279	-
SPAC31G5.15	266.456	0.177719	0.176183	1.00872	0.313108	0.893722	268.496	231.821	253.593	311.916	psd3	phosphatidylserine decarboxylase Psd3	I	3014466	3017698	+
SPBPJ4664.01	588.036	-0.118526	0.117472	-1.00897	0.312987	0.893722	635.118	589.458	553.293	574.275	dps1	decaprenyl diphosphate synthase subunit Dps1	II	684143	685360	+
SPAC3A12.02	302.554	-0.157475	0.156194	-1.00821	0.313355	0.893927	332.116	306.122	282.41	289.567	SPAC3A12.02	mitochondrial inorganic diphosphatase (predicted)	I	1421916	1422942	+
SPAC1B3.04c	605.134	0.11552	0.114654	1.00755	0.313668	0.894322	568.264	593.421	628.219	630.633	guf1	mitochondrial elongation factor GTPase Guf1 (predicted)	I	4931313	4933510	-
SPBC1861.02	120.579	0.248259	0.247824	1.00176	0.316462	0.894611	102.438	117.892	116.23	145.755	abp2	unknown protein, may bind replication origins Abp2	II	4131702	4133285	+
SPBC685.02	164.086	0.206904	0.206008	1.00435	0.315209	0.894611	153.118	151.575	176.747	174.906	exo5	mitochondrial single stranded DNA specific 5'-3' exodeoxyribonuclease Exo5 (predicted)	II	2772884	2774447	+
SPAC23A1.02c	204.052	0.187543	0.187109	1.00232	0.316189	0.894611	184.389	197.147	223.815	210.859	ted1	GPI-remodelling mannose-ethanolamine phosphate phosphodiesterase Ted1 (predicted)	I	4081483	4082775	-
SPCC613.02	379.57	0.142964	0.142295	1.0047	0.315042	0.894611	342.899	378.442	407.285	389.652	SPCC613.02	transmembrane transporter (predicted)	III	82860	84353	+
SPAC3A11.06	552.915	0.139742	0.139055	1.00494	0.314926	0.894611	595.221	457.697	546.569	612.171	mvp1	sorting nexin Mvp1 (predicted)	I	3459233	3461859	-
SPAC139.01c	1149.62	0.0944779	0.0940572	1.00447	0.315151	0.894611	1176.42	1048.15	1170.95	1202.96	mkt1	post-transcriptional RNA stability regulator Mkt1	I	1016366	1018875	-
SPCC594.02c	1108.58	0.0927875	0.0927666	1.00023	0.317201	0.894611	1100.94	1045.17	1104.67	1183.53	SPCC594.02c	DUF2456 family conserved fungal protein	III	358264	359733	-
SPBC18H10.14	4083.08	0.0689812	0.0685737	1.00594	0.314443	0.894611	3816.1	4153.95	4045	4317.26	rps1601	40S ribosomal protein S16 (predicted)	II	1793947	1794540	+
SPAC6F6.07c	9286.11	0.0571915	0.0568286	1.00639	0.31423	0.894611	8832.35	9370.9	9329.14	9612.06	rps13	40S ribosomal protein S13	I	2745955	2746640	-
SPAPB2B4.05	1361.76	-0.0888769	0.0887715	-1.00119	0.316736	0.894611	1357.58	1449.37	1260.28	1379.81	vma5	V-type ATPase V1 subunit C (predicted)	I	2720954	2722578	+
SPBC1215.02c	980.327	-0.0947046	0.0943365	-1.0039	0.315426	0.894611	1012.52	1012.48	962.5	933.804	naa25	NatB N-acetyltransferase complex regulatory subunit Naa25	II	1506412	1509383	-
SPBC26H8.05c	904.848	-0.0974169	0.0973656	-1.00053	0.317056	0.894611	944.59	926.292	886.614	861.898	ppe2	serine/threonine protein phosphatase, PP4 complex subunit Ppe2	II	3954715	3955929	-
SPAPJ691.03	811.622	-0.108108	0.108098	-1.00008	0.31727	0.894611	785.002	898.552	801.123	761.813	mic10	MICOS complex subunit Mic10 (predicted)	I	5189727	5190258	+
SPAC56E4.05	609.715	-0.115282	0.115067	-1.00186	0.31641	0.894611	635.118	633.049	605.165	565.529	snd2	SRP-independent ER targeting protein Snd2 (predicted)	I	1255591	1256227	+
SPBC409.05	596.453	-0.11642	0.116018	-1.00347	0.315634	0.894611	631.883	609.272	587.874	556.784	skp1	SCF ubiquitin ligase complex subunit Skp1	II	1140148	1140805	+
SPAC222.04c	462.59	-0.128392	0.128427	-0.999727	0.317443	0.894611	479.843	486.427	433.221	450.869	ies6	Ino80 complex subunit Ies6	I	950298	950651	-
SPAC328.04	469.024	-0.135027	0.134789	-1.00177	0.316456	0.894611	530.523	451.753	432.261	461.557	spg4	microtubule severing ATPase Spg4 (predicted)	I	3481909	3484134	+
SPAC18B11.11	370.142	-0.14331	0.143203	-1.00074	0.31695	0.894611	394.657	382.405	336.203	367.303	SPAC18B11.11	GTPase activating protein (predicted)	I	294902	298786	-
SPBC18H10.09	237.038	-0.175432	0.174226	-1.00692	0.313972	0.894611	251.244	251.634	231.5	213.774	SPBC18H10.09	zf-CHY type zinc finger protein	II	1786332	1787917	+
SPAC1565.03	133.194	-0.245651	0.245534	-1.00048	0.31708	0.894611	170.371	118.882	116.23	127.293	SPAC1565.03	Schizosaccharomyces pombe specific protein	I	1294483	1294983	+
SPCC777.03c	109.66	-0.256074	0.2554	-1.00264	0.316035	0.894611	107.83	130.771	95.0973	104.944	SPCC777.03c	nifs homolog, possible cysteine desulfurase	III	1601512	1602702	-
SPCC1223.10c	523.135	-0.1231	0.123254	-0.998753	0.317915	0.895448	522.975	567.663	496.619	505.284	eaf1	RNA polymerase II transcription elongation factor Eaf1	III	1860767	1861913	-
SPBC11G11.02c	840.112	0.102429	0.1026	0.998341	0.318114	0.895517	830.29	790.568	901.984	837.605	end3	actin cortical patch component End3 (predicted)	II	1758958	1760379	-
SPBC1347.13c	224.978	-0.177896	0.178331	-0.997564	0.318491	0.896084	246.93	230.83	214.209	207.944	mrm1	mitochondrial ribose methyltransferase Mrm1 (predicted)	II	4085349	4086438	-
SPBC3H7.08c	152.009	0.220601	0.221336	0.996683	0.318918	0.896388	125.083	155.538	171.944	155.472	SPBC3H7.08c	mitochondrial conserved fungal membrane protein	II	1869252	1869843	+
SPAC4H3.09	1112.79	-0.105549	0.105907	-0.996619	0.318949	0.896388	1034.09	1272.04	1047.99	1097.05	SPAC4H3.09	mitochondrial [2Fe-2S] cluster assembly and type II fatty acid synthase component (predicted)	I	3843416	3844022	+
SPCC188.12	115.992	-0.243502	0.244423	-0.996234	0.319137	0.896422	119.691	131.761	108.545	103.972	spn6	meiotic (sporulation) septin Spn6	III	1504941	1506145	+
SPBC23G7.07c	323.274	0.149883	0.150568	0.995453	0.319516	0.896994	300.845	312.066	336.203	343.982	cms1	U3-containing 90S preribosome complex subunit Cms1 (predicted)	II	2109409	2110357	-
SPAC2F3.11	652.569	0.11216	0.112739	0.99487	0.3198	0.897298	652.371	602.337	667.602	687.964	ppx1	exopolyphosphatase, prune Ppx1 (predicted)	I	3946578	3947774	+
SPCC16A11.12c	448.263	0.135373	0.136321	0.993042	0.32069	0.899302	462.59	392.312	463.96	474.19	ubp1	ubiquitin C-terminal hydrolase Ubp1	III	889437	892211	-
SPAC27E2.02	326.405	0.15716	0.158387	0.992254	0.321074	0.899886	319.177	298.197	311.228	377.02	yih1	IMPACT homolog, cytoplasmic translational regulator Yih1 (predicted)	I	4004507	4005508	+
SPBP23A10.06	792.51	-0.103728	0.104699	-0.990724	0.32182	0.901485	822.742	819.298	797.281	730.718	mtm1	mitochondrial carrier, manganese ion Mtm1 (predicted)	II	2005968	2006975	+
SPAC17A5.19	35.7741	0.42949	0.433843	0.989966	0.322191	0.901535	31.2707	29.7206	42.2655	39.8397	SPAC17A5.19	Schizosaccharomyces specific protein	I	1761133	1761455	+
SPAC11E3.04c	1255.18	-0.086633	0.0875067	-0.990016	0.322166	0.901535	1265.92	1319.59	1246.83	1188.39	ubc13	ubiquitin conjugating enzyme E2 Ubc13	I	5287384	5288081	-
SPBC1703.12	771.449	0.103602	0.104724	0.989285	0.322524	0.901974	750.496	737.071	774.227	824.001	ubp9	ubiquitin C-terminal hydrolase Ubp9	II	2936211	2938118	+
SPAC22E12.05c	1095.93	-0.0954675	0.0965646	-0.988639	0.32284	0.902364	1171.03	1093.72	1117.15	1001.82	rer1	Rer1 family protein (predicted)	I	5026800	5027407	-
SPCC1259.10	224.711	0.188148	0.191573	0.982123	0.326039	0.904365	222.13	198.137	208.446	270.133	pgp1	mitochondrial tRNA N6-threonyl-carbamoyl-adenosine (t6A) Pgp1	III	1052318	1053649	+
SPBC25B2.05	196.966	0.186378	0.189969	0.981098	0.326545	0.904365	182.233	186.249	201.722	217.661	mis3	rRNA processing protein Mis3	II	2605970	2606953	+
SPCC1919.13c	319.378	0.15138	0.154246	0.981418	0.326386	0.904365	305.159	300.178	356.375	315.802	bmt5	ribosome biogenesis protein Bmt5 (predicted)	III	2236152	2237123	-
SPAC6G9.06c	491.846	0.127092	0.128859	0.98629	0.323991	0.904365	450.729	489.399	488.935	538.322	pcp1	gamma tubulin complex linker, pericentrin/kendrin Pcp1	I	3254539	3258165	-
SPAC16C9.07	589.525	0.115959	0.118226	0.980823	0.32668	0.904365	593.064	538.933	603.244	622.86	pom2	DYRK family protein kinase Pom2	I	804996	807506	+
SPAC688.08	702.791	0.110682	0.112549	0.983417	0.325402	0.904365	632.962	718.248	715.631	744.322	srb8	mediator complex subunit Med12	I	3123163	3126653	+
SPBC1734.12c	805.382	0.100344	0.101973	0.984021	0.325105	0.904365	786.08	768.773	821.295	845.379	alg12	dolichyl pyrophosphate Man7GlcNAc2 alpha-1,6-mannosyltransferase Alg12 (predicted)	II	1083585	1085318	-
SPAC22G7.04	870.403	0.0993414	0.101289	0.980776	0.326703	0.904365	808.724	871.804	877.969	923.115	pan2	PAN complex (poly(A)-specific ribonuclease) ubiquitin C-terminal hydrolase subunit Pan2 (predicted)	I	732880	736465	+
SPAC17H9.13c	882.563	0.0965484	0.098219	0.982991	0.325612	0.904365	855.091	851	899.102	925.058	pro2	glutamate 5-kinase Pro2	I	2027344	2028752	-
SPAC328.06	925.099	0.0952888	0.0970801	0.981548	0.326322	0.904365	916.554	872.795	948.091	962.955	ubp2	ubiquitin C-terminal hydrolase Ubp2	I	3487325	3490834	+
SPBC1685.13	1834.81	0.0837822	0.0854274	0.980742	0.32672	0.904365	1908.59	1655.44	1916.35	1858.86	fhn1	eisosome assembly protein Fhn1	II	526091	526642	+
SPAPB18E9.02c	1449.28	0.0837155	0.0852128	0.982429	0.325889	0.904365	1372.67	1441.45	1436.07	1546.95	ppk18	greatwall kinase Ppk18	I	3976370	3980689	-
SPBC1778.06c	4325.09	-0.0618358	0.0629062	-0.982984	0.325615	0.904365	4291.63	4543.29	4282.26	4183.17	fim1	fimbrin	II	3106767	3108741	-
SPBC146.14c	2848.02	-0.0655357	0.066518	-0.985232	0.32451	0.904365	2929.74	2895.78	2797.21	2769.34	sec26	coatomer beta subunit (predicted)	II	1029116	1031938	-
SPAC17C9.07	717.065	-0.107289	0.109092	-0.983475	0.325374	0.904365	777.454	710.322	697.38	683.105	alg8	dolichyl pyrophosphate Glc1Man9GlcNAc2 alpha-1,3-glucosyltransferase Alg8 (predicted)	I	4486562	4488067	-
SPBC2F12.02c	714.992	-0.108551	0.110117	-0.985784	0.324239	0.904365	726.774	756.884	722.355	653.954	mrpl7	mitochondrial ribosomal protein subunit L7 (predicted)	II	1738978	1739841	+
SPBC428.15	432.165	-0.130772	0.13267	-0.985695	0.324283	0.904365	464.747	438.874	414.01	411.029	SPBC428.15	Obg-like ATPase, human OLA1 ortholog (predicted)	II	472210	473439	+
SPBC56F2.03	184.11	-0.20922	0.213336	-0.980705	0.326738	0.904365	175.763	218.942	194.037	147.698	arp10	dynactin complex actin-like protein Arp10 (predicted)	II	4121486	4122628	-
SPBC31E1.01c	456.075	-0.139219	0.142056	-0.980028	0.327072	0.904799	489.548	466.613	384.232	483.907	atg2	autophagy associated intermembrane lipid transfer protein Atg2	II	234503	239513	-
SPAC10F6.05c	601.719	0.113584	0.115971	0.979419	0.327373	0.905143	557.481	598.375	633.022	618.001	ubc6	ubiquitin conjugating enzyme E2 Ubc6 (predicted)	I	1215121	1215928	-
SPAC3H5.08c	637.164	0.115253	0.117748	0.978817	0.32767	0.905414	636.196	587.477	623.416	701.567	SPAC3H5.08c	WD repeat protein, human WDR44 family	I	3425966	3428910	+
SPBC651.02	523.913	-0.121291	0.123956	-0.978504	0.327825	0.905414	565.029	527.045	519.673	483.907	nit1	bis(5'-adenosyl)-triphosphatase Nit1 (predicted)	II	1240185	1241234	+
SPAC21E11.06	1270.14	0.0849563	0.0868755	0.977909	0.328119	0.905736	1199.07	1266.1	1293.9	1321.51	tif224	translation initiation factor eIF2B delta subunit	I	4257736	4259139	+
SPBC947.15c	2168.9	-0.0709182	0.0726313	-0.976414	0.328859	0.90729	2235.31	2209.23	2157.46	2073.61	ndi1	internal mitochondrial NADH dehydrogenase (ubiquinone) Ndi1 (predicted)	II	641686	643341	+
SPCC74.01	1026.64	-0.0903086	0.0926255	-0.974987	0.329567	0.908145	1053.5	1064	1006.69	982.389	sly1	SNARE binding protein Sly1 (predicted)	III	1923197	1925375	+
SPAC24C9.05c	574.447	-0.114624	0.117641	-0.974357	0.32988	0.908145	608.161	586.486	564.82	538.322	mug70	CBS and PB1 domain protein, conserved in fungi and plants, implicated in signalling Mug70	I	3045121	3047313	-
SPBC30B4.08	346.013	-0.142671	0.146378	-0.974671	0.329724	0.908145	352.604	373.489	325.636	332.321	eri1	double-strand siRNA ribonuclease Eri1	II	1320692	1321833	+
SPAC3A12.08	287.665	-0.15804	0.162193	-0.974398	0.329859	0.908145	312.707	294.234	289.134	254.585	SPAC3A12.08	acyl-coenzyme A thioesterase	I	1435139	1435783	+
SPAC10F6.11c	743.013	-0.103297	0.106169	-0.972947	0.33058	0.909094	791.472	747.968	727.158	705.454	atg17	autophagy associated protein kinase activator Atg17	I	1227416	1228651	-
SPAC30D11.10	405.719	-0.139495	0.143355	-0.97307	0.330519	0.909094	463.669	387.358	391.916	379.935	rad52	DNA recombination protein, Rad51 mediator Rad52 (previously Rad22)	I	1100128	1101537	-
SPAC637.10c	1364.37	-0.0822885	0.0846767	-0.971796	0.331152	0.910178	1428.75	1378.04	1353.46	1297.22	rpn10	19S proteasome regulatory subunit Rpn10	I	4557721	4558636	-
SPAC26H5.04	667.046	-0.106487	0.109641	-0.971239	0.331429	0.910451	685.798	697.443	640.706	644.237	gid5	GID complex armadillo repeat subunit Gid5 (predicted)	I	4122149	4124518	+
SPAC227.18	2626.21	-0.071497	0.0736697	-0.970507	0.331794	0.910964	2642.91	2739.25	2442.75	2679.95	lys3	saccharopine dehydrogenase Lys3	I	530522	531628	+
SPBC31F10.08	221.363	-0.176632	0.18213	-0.96981	0.332141	0.911429	248.009	221.914	198.84	216.689	mde2	Mde2 protein	II	3764820	3765709	+
SPCC18.12c	348.165	0.146975	0.151731	0.968652	0.332719	0.912524	359.074	302.159	358.296	373.133	utp23	rRNA processing protein Utp23 (predicted)	III	1977223	1978301	-
SPBC2A9.06c	425.075	0.131989	0.13642	0.967517	0.333285	0.913239	400.049	411.135	418.812	470.303	nus1	di-trans,poly-cis-decaprenylcistransferase Nus1	II	2957587	2958430	-
SPAC1F3.04c	603.786	-0.114148	0.117993	-0.967414	0.333337	0.913239	595.221	659.797	594.598	565.529	tsr3	SSU-rRNA maturation protein Tsr3 (predicted)	I	621189	622191	-
SPBC83.18c	371.739	0.137633	0.142366	0.966757	0.333665	0.913343	363.387	344.759	378.468	400.34	fic1	C2 domain protein Fic1	II	1543895	1544766	-
SPAC5H10.10	1108.4	0.0958468	0.0991928	0.966267	0.33391	0.913343	1010.37	1132.35	1207.45	1083.45	SPAC5H10.10	NADPH dehydrogenase, (Old yellow enzyme) involved in small alpha,beta-unsaturated carbonyl compounds (predicted)	I	162960	164138	+
SPBC15D4.02	329.414	-0.143879	0.14889	-0.966347	0.333871	0.913343	342.899	348.722	313.149	312.887	gsf1	DNA-binding transcription factor, zf-fungal binuclear cluster type Gsf1	II	3012934	3014577	+
SPBC106.09	290.432	0.152312	0.157773	0.96539	0.33435	0.914056	272.81	277.392	307.385	304.142	cut4	anaphase-promoting complex, platform subcomplex scaffold subunit Apc1	II	390989	395365	+
SPAC16E8.16	280.394	0.158701	0.164668	0.963764	0.335164	0.915384	282.514	247.672	284.331	307.057	sua7	transcription factor TFIIB	I	3530337	3531503	+
SPBC32H8.12c	16977.3	0.0498325	0.0517093	0.963706	0.335193	0.915384	16315.7	17051.7	17230.9	17310.8	act1	actin Act1	II	1476149	1477276	-
SPBC1347.14c	371.89	0.138047	0.143465	0.962234	0.335932	0.915935	337.508	370.517	399.601	379.935	SPBC1347.14c	dubious	II	4082279	4082644	-
SPCC1795.10c	502.863	0.123297	0.128063	0.962781	0.335657	0.915935	458.277	504.259	548.491	500.425	svp26	Sed5 Vesicle Protein Svp26 (predicted)	III	977441	978124	+
SPAC31A2.12	697.361	0.107611	0.111825	0.96231	0.335894	0.915935	662.076	680.601	763.66	683.105	rod1	arrestin/PY protein involved in ubiquitin-mediated endocytosis Rod1 (predicted)	I	412084	413874	+
SPBC839.08c	1272.7	0.0829067	0.0864001	0.959567	0.337273	0.917663	1265.92	1206.66	1301.58	1316.65	its8	pig-N (predicted)	II	613507	616466	-
SPAC31G5.14	6967.09	-0.0535249	0.0557562	-0.95998	0.337065	0.917663	7199.8	6993.25	6831.64	6843.68	gcv1	glycine decarboxylase T subunit (predicted)	I	3012593	3013756	+
SPAC1F7.11c	477.665	-0.125994	0.131306	-0.959546	0.337284	0.917663	463.669	532.989	451.472	462.529	SPAC1F7.11c	DNA-binding transcription factor, zf-fungal binuclear cluster type (predicted)	I	4245302	4247797	-
SPBC4B4.02c	427.271	-0.129279	0.13464	-0.960183	0.336963	0.917663	455.042	437.883	425.536	390.623	nca2	mitochondrial protein Nca2 (predicted)	II	3413338	3415059	-
SPBC16E9.01c	620.637	0.113825	0.11874	0.958607	0.337757	0.917973	591.986	600.356	689.696	600.511	php4	CCAAT-binding factor complex repressor Php4	II	1915850	1916737	-
SPCC63.02c	1039.8	0.0896768	0.0935335	0.958767	0.337676	0.917973	1039.48	975.826	1064.32	1079.56	aah3	alpha-amylase homolog Aah3	III	833966	835660	-
SPAC19D5.10c	9.82936	0.810843	0.85121	0.952578	0.340804	0.918749	4.3132	9.90686	14.4087	10.6887	SPAC19D5.10c	dubious	I	5221387	5221719	-
SPAC22E12.14c	223.777	0.17516	0.18349	0.954599	0.339781	0.918749	226.443	194.175	225.736	248.755	sck2	serine/threonine protein kinase S6K Sck2	I	5046577	5048517	-
SPAC17G8.01c	269.876	0.158131	0.166129	0.951852	0.341172	0.918749	270.653	239.746	278.568	290.538	trl1	tRNA ligase Trl1 (predicted)	I	2341346	2343756	-
SPBC649.05	293.461	0.14994	0.157565	0.951608	0.341296	0.918749	276.045	280.364	300.661	316.774	cut12	spindle pole body protein Cut12	II	541283	542971	+
SPCC417.11c	318.246	0.144865	0.151816	0.954219	0.339973	0.918749	294.376	310.085	336.203	332.321	SPCC417.11c	glutamate-1-semialdehyde 2,1-aminomutase (predicted)	III	1698190	1699506	-
SPBC1709.10c	372.26	0.138401	0.145369	0.952062	0.341065	0.918749	332.116	376.461	403.443	377.02	atx1	copper chaperone Atx1	II	1119852	1120181	-
SPBC12D12.05c	485.69	0.121521	0.127626	0.952167	0.341012	0.918749	466.903	463.641	529.279	482.935	SPBC12D12.05c	mitochondrial carrier, ATP:ADP antiporter (predicted)	II	2314669	2315986	-
SPBC119.05c	535.639	0.118803	0.124275	0.955967	0.339089	0.918749	496.018	531.008	585.953	529.576	lsb1	Wiskott-Aldrich syndrome homolog binding protein Lsb1 (predicted)	II	721453	722343	-
SPCC962.03c	772.081	0.0990184	0.103715	0.954716	0.339721	0.918749	746.183	744.996	783.832	813.313	cut15	importin alpha family nuclear import signal receptor adaptor Cut15	III	550473	552101	-
SPCC188.08c	788.302	0.0988622	0.10349	0.955281	0.339436	0.918749	739.713	782.642	809.768	821.086	ubp5	ubiquitin C-terminal hydrolase Ubp5	III	1488934	1492390	-
SPAC20G4.03c	1297.63	0.0818763	0.0860626	0.951358	0.341423	0.918749	1246.51	1275.01	1366.9	1302.08	hri1	eIF2 alpha kinase Hri1	I	4818259	4820373	-
SPAC56F8.10	2285.4	0.0688723	0.0721415	0.954685	0.339737	0.918749	2185.71	2275.61	2301.55	2378.72	met9	methylenetetrahydrofolate reductase Met9	I	1143115	1144926	+
SPAC6F6.12	945.466	-0.0925904	0.0971782	-0.95279	0.340696	0.918749	1001.74	950.068	893.338	936.719	atg24	autophagy associated PX/BAR domain sorting nexin Atg24	I	2754768	2756129	+
SPBC23E6.08	670.131	-0.104411	0.109718	-0.951627	0.341286	0.918749	706.286	682.583	648.391	643.265	sat1	Golgi membrane exchange factor subunit Sat1 (predicted)	II	3856354	3858296	+
SPAC2F3.02	654.706	-0.109847	0.114839	-0.956525	0.338807	0.918749	641.588	717.257	614.771	645.209	SPAC2F3.02	ER protein translocation subcomplex subunit (predicted)	I	3924753	3925331	+
SPAC607.06c	510.539	-0.12672	0.132347	-0.957479	0.338326	0.918749	534.836	531.008	440.906	535.407	SPAC607.06c	metallopeptidase (predicted)	I	2045210	2047144	-
SPCC338.08	389.422	-0.13364	0.139952	-0.954903	0.339627	0.918749	409.754	405.191	388.074	354.67	ctp1	CtIP-related endonuclease	III	1358891	1359819	-
SPCC4G3.07c	326.757	-0.143046	0.15037	-0.951295	0.341455	0.918749	346.134	339.805	320.833	300.255	phf1	PHD finger protein Phf1	III	460117	461502	+
SPBC1709.20	78.7164	-0.281903	0.295468	-0.954091	0.340037	0.918749	90.5771	82.227	67.2405	74.8209	pop8	RNase P and RNase MRP subunit Pop8	II	1112735	1113159	+
SPBC25B2.11	267.451	0.15862	0.166916	0.950299	0.34196	0.919205	245.852	259.56	266.08	298.312	pof2	F-box protein Pof2	II	2617862	2619336	+
SPCC1739.02c	521.541	-0.116202	0.122321	-0.949975	0.342125	0.919205	553.167	531.999	490.856	510.142	mrpl22	mitochondrial ribosomal protein subunit L22 (predicted)	III	2028281	2029030	-
SPCP20C8.02c	2.79498	-1.51156	1.59128	-0.949899	0.342164	0.919205	4.3132	3.96275	0.960579	1.9434	SPCP20C8.02c	S. pombe specific UPF0321 family protein 1	III	31185	31520	-
SPAC222.11	2225.5	-0.0680281	0.0716768	-0.949094	0.342573	0.919338	2250.41	2305.33	2194.92	2151.34	hem13	coproporphyrinogen III oxidase Hem13 (predicted)	I	966430	967368	+
SPBC2A9.02	2276.8	-0.0760059	0.0800689	-0.949257	0.34249	0.919338	2216.98	2455.91	2312.11	2122.19	SPBC2A9.02	NADH-dependent glycolaldehyde/furfural/butyraldehyde/propylaldehydealdehyde reductase (predicted)	II	2948648	2949535	+
SPAC15A10.15	496.26	0.127599	0.134601	0.947979	0.34314	0.920012	497.096	451.753	472.605	563.586	sgo2	centromeric adaptor, shugoshin Sgo2	I	3714187	3716313	+
SPAC18G6.10	736.133	0.101283	0.106891	0.947541	0.343363	0.920012	734.322	686.546	752.133	771.53	lem2	LEM domain nuclear inner membrane protein Heh1/Lem2	I	2234598	2236664	+
SPAC1783.08c	3914.66	0.0598176	0.0631179	0.947712	0.343276	0.920012	3750.32	3916.18	3951.82	4040.33	rpl1502	60S ribosomal protein L15b (predicted)	I	2203741	2204346	-
SPCC777.13	1342.31	-0.0801736	0.0846512	-0.947105	0.343585	0.920124	1352.19	1406.77	1318.87	1291.39	vps35	retromer complex subunit Vps35	III	1619556	1622337	+
SPAC1142.09	1.45396	2.23418	2.37113	0.942244	0.346068	0.920416	0	0.990686	2.88174	1.9434	SPAC1142.09	dubious	I	3642498	3642845	+
SPCC70.09c	35.1011	0.417081	0.442821	0.941872	0.346258	0.920416	33.4273	26.7485	36.502	43.7265	mug9	DUF2406 family conserved fungal protein	III	2369108	2369790	-
SPBP35G2.10	255.015	0.164231	0.17372	0.945376	0.344467	0.920416	223.208	257.578	253.593	285.68	mit1	SHREC complex ATP-dependent DNA helicase subunit Mit1	II	982068	986324	+
SPAC17C9.08	669.662	0.104711	0.111246	0.941258	0.346573	0.920416	630.805	659.797	715.631	672.416	pnu1	mitochondrial endodeoxyribonuclease Pnu1	I	4484835	4485994	-
SPAC3G9.14	848.181	0.0942473	0.100071	0.941801	0.346295	0.920416	821.664	819.298	857.797	893.964	sak1	DNA-binding transcription factor Sak1	I	3147207	3149507	-
SPCC737.02c	3058.06	0.0621335	0.0659961	0.941473	0.346463	0.920416	3036.49	2948.28	3154.54	3092.92	qcr7	ubiquinol-cytochrome-c reductase complex subunit 6 (predicted)	III	1887542	1887955	-
SPBC646.13	3707.83	-0.06137	0.0649151	-0.94539	0.34446	0.920416	3735.23	3837.92	3730.89	3527.27	sds23	PP2A-type phosphatase inhibitor Sds23/Moc1	II	950881	952107	+
SPAC1D4.02c	875.903	-0.0993322	0.105342	-0.942954	0.345704	0.920416	957.53	854.962	807.847	883.275	grh1	human GRASP protein family Golgi protein (predicted)	I	640399	641627	-
SPBC36.12c	512.731	-0.118907	0.125637	-0.946436	0.343926	0.920416	533.758	533.98	518.713	464.473	git7	SGT1-like protein Git7	II	864756	865994	-
SPAC1805.10	490.413	-0.120001	0.127381	-0.942063	0.34616	0.920416	529.445	492.371	486.053	453.784	SPAC1805.10	Schizosaccharomyces specific protein	I	2791243	2792826	+
SPAC24H6.01c	407.828	-0.132821	0.14076	-0.943604	0.345372	0.920416	457.199	396.275	378.468	399.369	gup1	membrane bound O-acyltransferase, MBOAT Gup1 (predicted)	I	490016	492011	+
SPBC244.01c	382.748	-0.13352	0.141656	-0.942563	0.345905	0.920416	380.64	420.051	371.744	358.557	sid4	SIN component scaffold protein Sid4	II	4360640	4362842	+
SPAC31A2.13c	370.961	-0.13578	0.144102	-0.942246	0.346067	0.920416	392.501	384.386	373.665	333.293	sft1	SNARE Sft1 (predicted)	I	414471	414800	-
SPBC409.23	304.347	-0.155992	0.165146	-0.94457	0.344878	0.920416	296.532	344.759	262.238	313.859	mim2	mitochondrial outer membrane translocase complex assembly protein Mim2 (predicted)	II	1164318	1164885	+
SPBC56F2.04	316.455	-0.156557	0.166211	-0.941919	0.346234	0.920416	362.308	305.131	268.002	330.378	utp20	U3 snoRNP protein Utp20 (predicted)	II	4113062	4120692	-
SPBC800.02	97.4461	-0.254591	0.269156	-0.945887	0.344206	0.920416	111.065	101.05	97.0185	80.6511	whi5	cell cycle transcriptional repressor Whi5 (predicted)	II	253148	253984	+
SPBC649.03	485.11	0.121582	0.129263	0.940581	0.34692	0.920858	450.729	478.501	532.161	479.048	rhp14	XP-A family homolog Rhp14	II	536985	537854	+
SPBC405.07	1854.04	-0.0732744	0.0780498	-0.938817	0.347825	0.921349	1834.19	1967.5	1784.76	1829.71	rpl3602	60S ribosomal protein L36	II	3153502	3153876	+
SPAC4F8.10c	972.865	-0.0891558	0.0949612	-0.938866	0.3478	0.921349	981.252	1024.37	943.289	942.549	stg1	SM22/transgelin-like actin modulating protein Stg1	I	2661801	2662325	+
SPBC19C2.13c	116.708	-0.235344	0.250571	-0.939232	0.347612	0.921349	132.631	119.873	120.072	94.2549	ctu2	cytosolic thiouridylase subunit Ctu2	II	1700873	1701973	-
SPBC27.05	39.8555	-0.410976	0.437386	-0.939619	0.347413	0.921349	33.4273	57.4598	39.3837	29.151	SPBC27.05	dubious	II	1569746	1570072	+
SPAC2F3.07c	263.457	-0.156766	0.167067	-0.938337	0.348071	0.921524	263.105	292.252	252.632	245.84	SPAC2F3.07c	Schizosaccharomyces pombe specific protein	I	3935528	3935833	-
SPBC16E9.19	287.815	0.150701	0.160718	0.937672	0.348413	0.921952	278.201	267.485	317.952	287.623	pac3	proteasome assembly chaperone Pac3 (predicted)	II	1921511	1922173	+
SPAC13D6.01	293.158	-0.155104	0.165498	-0.937197	0.348657	0.922121	340.743	277.392	281.45	273.048	pof14	F-box protein Pof14	I	2245786	2247081	+
SPAC1006.02	300.601	-0.145602	0.155475	-0.936498	0.349017	0.922595	309.472	321.973	286.253	284.708	asa1	ASTRA complex WD repeat subunit Asa1	I	5069696	5070802	+
SPAC56F8.15	85.1925	-0.266901	0.28534	-0.93538	0.349593	0.92364	95.9686	90.1525	71.0828	83.5662	SPAC56F8.15	Schizosaccharomyces pombe specific protein	I	1152068	1152598	+
SPBC336.05c	108.397	0.237786	0.254344	0.934898	0.349841	0.923818	94.8903	104.022	124.875	109.802	hen1	small RNA 2'-O-methyltransferase Hen1 (predicted)	II	2747191	2748327	-
SPCC18B5.10c	287.034	0.150254	0.161222	0.931973	0.351351	0.924464	286.828	257.578	309.306	294.425	tex1	TREX complex subunit Tex1 (predicted)	III	738016	739255	-
SPBC215.12	590.383	0.10883	0.116649	0.932969	0.350836	0.924464	572.577	563.7	592.677	632.577	cwf10	U5 snRNP GTPase subunit Cwf10	II	4052601	4055696	+
SPBC15D4.15	3708.12	-0.0606661	0.065094	-0.931976	0.351349	0.924464	3666.22	3905.29	3655	3605.98	pho2	4-phosphoerythronate phosphastase/2-phosphoglycolate phophatase, involved in detoxification of glycolytic by-products	II	3036128	3037110	+
SPAC6F6.15	1678.64	-0.0782626	0.0838507	-0.933356	0.350636	0.924464	1822.33	1626.71	1624.34	1641.2	ypt5	GTPase Ypt5	I	2762302	2763390	+
SPCC1259.08	1312.21	-0.0790344	0.0846463	-0.933702	0.350457	0.924464	1362.97	1333.46	1279.49	1272.93	SPCC1259.08	DUF2457 family conserved fungal protein	III	1048603	1049787	+
SPAC823.05c	676.901	-0.1016	0.108968	-0.932385	0.351138	0.924464	703.051	698.434	657.997	648.124	tlg2	SNARE Tlg2 (predicted)	I	2588863	2589820	-
SPBC211.04c	571.795	-0.114849	0.123055	-0.933319	0.350655	0.924464	628.648	560.728	522.555	575.246	mcm6	MCM complex subunit Mcm6	II	3880318	3882996	-
SPCC550.14	2494.76	0.0753244	0.0809582	0.930412	0.352158	0.925636	2476.85	2382.6	2374.55	2745.05	vgl1	KH domain RNA binding protein, vigilin (predicted)	III	1217142	1221017	+
SPAC1F12.09	589.893	-0.110225	0.118428	-0.930733	0.351992	0.925636	586.595	638.002	584.993	549.982	gpi17	pig-S (predicted)	I	3818668	3820420	+
SPCC18.13	252.744	0.160491	0.172643	0.929612	0.352572	0.926232	257.713	219.932	263.199	270.133	SPCC18.13	tRNA (guanine-N7-)-methyltransferase WD repeat subunit Trm82 (predicted)	III	1978895	1980233	+
SPAC23H4.13c	217.631	-0.169228	0.182107	-0.929274	0.352747	0.926232	232.913	227.858	194.037	215.717	SPAC23H4.13c	Schizosaccharomyces specific protein	I	1586693	1587327	+
SPCC622.04	49.1825	0.345277	0.371703	0.928905	0.352938	0.926259	42.0537	44.5809	58.5953	51.5001	SPCC622.04	dubious	III	1406677	1407099	+
SPBC947.01	987.521	0.087211	0.0939808	0.927967	0.353425	0.92706	969.391	946.105	1020.13	1014.45	knk1	AAA family ATPase kink, Knk1	II	680549	682626	-
SPAC227.02c	214.844	0.170552	0.183898	0.927429	0.353704	0.927316	195.172	209.035	216.13	239.038	rrp15	rRNA processing protein Rrp15 (predicted)	I	501767	502384	-
SPBC887.03c	890.383	0.0941379	0.101646	0.926136	0.354375	0.928601	906.85	816.325	931.762	906.596	noc3	Noc2p-Noc3p complex subunit Noc3	II	3543670	3545958	-
SPCP1E11.03	124.41	0.218487	0.237191	0.921144	0.356975	0.928617	111.065	118.882	126.796	140.896	mug170	arrestin family Schizosaccharomyces specific protein Mug170	III	2394675	2396096	+
SPAC1D4.01	181.837	0.18133	0.196454	0.923017	0.355998	0.928617	171.45	169.407	189.234	197.255	tls1	splicing factor Tls1	I	639411	640175	+
SPBC1711.17	386.952	0.133435	0.144818	0.921398	0.356843	0.928617	351.525	386.368	377.508	432.406	prp16	ATP-dependent RNA helicase Prp16	II	2166259	2169780	+
SPAC24H6.13	438.738	0.12229	0.132795	0.920896	0.357104	0.928617	402.206	437.883	461.078	453.784	SPAC24H6.13	calcium permeable stress-gated cation channel (predicted)	I	457061	459676	-
SPBC1773.11c	721.086	0.0986976	0.106759	0.924487	0.355233	0.928617	694.425	698.434	761.739	729.747	mug89	phospholipid-translocating ATPase complex Lem3 family subunit (predicted)	II	305301	306491	-
SPAC31G5.10	1094.08	0.0860484	0.0932975	0.922301	0.356371	0.928617	1059.97	1063.01	1175.75	1077.62	eta2	Myb family protein, RNA polymerase I termination factor Eta2 (predicted)	I	3002057	3003766	+
SPAC19A8.04	6494.2	0.0512993	0.0556846	0.921248	0.356921	0.928617	6408.33	6349.31	6618.39	6600.76	erg5	C-22 sterol desaturase Erg5	I	2480147	2482110	-
SPBC1683.03c	1292.66	-0.0786454	0.0850052	-0.925183	0.354871	0.928617	1325.23	1330.49	1246.83	1268.07	SPBC1683.03c	transmembrane transporter (predicted)	II	138525	140084	-
SPBC211.08c	913.666	-0.0932874	0.100919	-0.92438	0.355289	0.928617	899.301	986.724	910.629	858.011	mtr3	exosome subunit Mtr3	II	3887467	3888278	-
SPCC4B3.04c	769.381	-0.0956874	0.103451	-0.924957	0.354989	0.928617	788.237	801.465	742.528	745.294	nte1	lysophospholipase (predicted)	III	1168730	1172786	+
SPAC688.12c	681.585	-0.103252	0.112104	-0.921035	0.357032	0.928617	737.557	674.657	637.824	676.303	SPAC688.12c	Schizosaccharomyces specific protein	I	3138722	3139225	-
SPCC162.05	709.038	-0.107017	0.115997	-0.922584	0.356224	0.928617	738.635	732.117	741.567	623.831	coq3	hexaprenyldihydroxybenzoate methyltransferase Coq3	III	1578220	1579044	-
SPBP4H10.07	668.251	-0.108661	0.117953	-0.921228	0.356931	0.928617	748.34	638.993	661.839	623.831	SPBP4H10.07	ubiquitin-protein ligase E3, unknown specificity (predicted)	II	2881805	2883556	+
SPAC56F8.07	286.592	-0.153922	0.166605	-0.923874	0.355552	0.928617	297.611	306.122	298.74	243.897	SPAC56F8.07	ER membrane integral protein, implicated in sterol metabolism (predicted)	I	1138566	1139117	+
SPCC663.12	128.252	-0.22455	0.243142	-0.923532	0.35573	0.928617	119.691	156.528	110.467	126.321	cid12	poly(A) polymerase Cid12	III	1655669	1656679	+
SPBC17A3.03c	761.664	-0.0973597	0.105818	-0.920065	0.357539	0.929274	773.14	801.465	761.739	710.313	SPBC17A3.03c	phosphoprotein phosphatase (predicted)	II	1404360	1405466	-
SPBC30D10.05c	1554.88	-0.0736039	0.0800438	-0.919546	0.35781	0.929507	1571.08	1617.79	1517.71	1512.94	SPBC30D10.05c	sepiapterin reductase (predicted)	II	3089997	3090740	+
SPCC4G3.15c	596.372	0.108158	0.117688	0.919017	0.358087	0.929753	585.516	562.71	646.47	590.794	not2	CCR4-Not complex NOT box subunit Not2	III	441589	442696	+
SPBC776.08c	279.922	0.154354	0.168071	0.918391	0.358414	0.930132	281.436	248.662	271.844	317.746	utp22	small-subunit processome, UTP-C complex subunit Utp22 (predicted)	II	3187742	3191086	-
SPAC1093.07	14.7047	0.643078	0.703321	0.914345	0.360536	0.931192	15.0962	7.92549	13.4481	22.3491	SPAC1093.07	dubious	I	4605907	4606143	-
SPBC29A3.08	142.273	0.201155	0.222112	0.905646	0.365123	0.931192	138.022	126.808	157.535	146.727	pof4	elongin-A, F-box protein Pof4 (predicted)	II	2053033	2053823	+
SPAC683.02c	163.128	0.19273	0.210664	0.914867	0.360261	0.931192	164.98	139.687	170.022	177.821	SPAC683.02c	zf-CCHC type zinc finger protein, human ZCCHC9 ortholog, implicated in mRNA splicing (predicted)	I	4197659	4198315	-
SPAC12B10.15c	162.953	0.192239	0.211063	0.910817	0.362392	0.931192	146.649	157.519	187.313	160.33	SPAC12B10.15c	ribonuclease H2 complex subunit (predicted)	I	4600263	4600706	-
SPCC1827.08c	171.644	0.184474	0.201959	0.913425	0.361019	0.931192	163.901	157.519	185.392	179.764	pof7	F-box protein Pof7	III	2371994	2373079	-
SPAC11H11.03c	203.451	0.172027	0.189992	0.905443	0.365231	0.931192	199.485	183.277	201.722	229.321	SPAC11H11.03c	ATP-dependent polydeoxyribonucleotide 5'-hydroxyl-kinase activity implicated in DNA repair (predicted)	I	4779181	4780249	-
SPBC1703.11	295.903	0.143944	0.15694	0.917192	0.359042	0.931192	288.984	273.429	311.228	309.972	opa3	mitochondrial outer membrane lipid metabolism regulator Opa3	II	2934982	2935821	+
SPBC20F10.06	353.733	0.132397	0.144705	0.914943	0.360221	0.931192	333.194	341.787	377.508	362.444	mad2	mitotic spindle checkpoint protein Mad2	II	3294275	3294973	+
SPBC1539.10	349.216	0.131552	0.145437	0.904533	0.365713	0.931192	326.725	339.805	368.862	361.472	nop16	ribosome biogenesis protein Nop16 (predicted)	II	4380486	4381237	+
SPAC3F10.18c	445.861	0.130651	0.144362	0.905026	0.365452	0.931192	445.338	406.181	414.01	517.916	rpl4102	60S ribosomal protein L41 (predicted)	I	2853790	2853919	-
SPAC5D6.12	385.292	0.127229	0.140006	0.908737	0.363489	0.931192	359.074	377.451	413.049	391.595	mtf2	mitochondrial translation protein, Mtf2 (predicted)	I	1492880	1493824	-
SPAC16E8.13	410.811	0.124068	0.135657	0.914568	0.360418	0.931192	400.049	386.368	438.024	418.803	SPAC16E8.13	ubiquitin-protein ligase E3, human BRAP ortholog (predicted)	I	3525304	3526947	+
SPCC11E10.06c	434.603	0.120294	0.132229	0.909741	0.362959	0.931192	425.928	407.172	446.669	458.642	elp4	elongator complex subunit Elp4	III	1463253	1464338	-
SPBC14C8.12	620.31	0.106244	0.116788	0.909718	0.362971	0.931192	599.534	595.402	607.086	679.218	rpb8	DNA-directed RNA polymerase I, II and III subunit Rpb8	II	2223772	2224256	+
SPAC1250.01	693.521	0.102729	0.112462	0.913457	0.361002	0.931192	631.883	705.369	698.341	738.492	snf21	RSC-type complex ATP-dependent DNA helicase Snf21	I	5100376	5104016	-
SPAC19A8.08	643.323	0.102242	0.1127	0.907205	0.364298	0.931192	603.847	637.011	651.273	681.162	upf2	nonsense-mediated decay protein Upf2	I	2468794	2471943	-
SPAC22G7.10	966.81	0.0869457	0.0949489	0.915711	0.359819	0.931192	925.181	950.068	1006.69	985.304	iss1	mRNA cleavage and polyadenylation specificity factor complex subunit Iss1	I	753704	754830	+
SPBP8B7.30c	1398.15	0.0768721	0.0844945	0.909788	0.362934	0.931192	1358.66	1363.18	1481.21	1389.53	thi5	DNA-binding transcription factor Thi5	II	3695121	3697694	-
SPBC1604.08c	1634	0.0754406	0.0823396	0.916213	0.359555	0.931192	1578.63	1603.92	1751.14	1602.33	imp1	importin alpha family nuclear import signal receptor adaptor Imp1	II	3916626	3918245	+
SPCC1235.15	1542.42	0.0752116	0.0831159	0.9049	0.365518	0.931192	1440.61	1563.3	1598.4	1567.35	dga1	diacylglycerol O-acyltransferase Dga1	III	215424	216910	+
SPCC18.01c	1830.29	-0.0696618	0.0765144	-0.910441	0.36259	0.931192	1893.49	1855.56	1751.14	1820.97	adg3	beta-glucosidase Adg3 (predicted)	III	1948578	1951973	-
SPBC16H5.07c	1404.05	-0.0758688	0.083755	-0.905841	0.36502	0.931192	1424.43	1457.3	1334.24	1400.22	ppa2	serine/threonine protein phosphatase Ppa2	II	2287017	2288277	+
SPBC23E6.06c	1215.6	-0.0796683	0.0879711	-0.905619	0.365138	0.931192	1226.03	1272.04	1159.42	1204.91	rib3	3,4-dihydroxy-2-butanone 4-phosphate synthase Rib3 (predicted)	II	3851754	3852459	-
SPAC26H5.05	856.57	-0.0923485	0.101381	-0.910906	0.362345	0.931192	912.241	855.953	807.847	850.237	mga2	IPT/TIG ankyrin repeat gene-specific transcription coactivator Mga2	I	4125212	4128667	+
SPAC13D6.05	666.828	-0.0993164	0.109619	-0.906014	0.364928	0.931192	689.033	690.508	648.391	639.379	alp11	tubulin specific chaperone cofactor B	I	2253468	2254172	+
SPBC18E5.10	619.718	-0.102979	0.11356	-0.906826	0.364499	0.931192	642.666	640.974	584.032	611.199	SPBC18E5.10	mitochondrial iron-sulfur cluster protein (predicted)	II	2092851	2094277	+
SPBC1652.01	628.122	-0.105447	0.11613	-0.908009	0.363873	0.931192	665.311	637.011	636.864	573.303	stb3	DNA-binding transcription factor Stb3 (predicted)	II	4253265	4254440	+
SPBC12D12.01	589.941	-0.110408	0.121878	-0.905884	0.364997	0.931192	657.762	567.663	556.175	578.161	sad1	spindle pole body SUN domain protein Sad1	II	2304182	2305726	+
[truncated: 3,146 more rows]

## Sheet: S3_5-adamantyl-IAA vs control
Systematic name	baseMean	log2FoldChange	lfcSE	stat	pvalue	padj	control-replicate-1	control-replicate-2	5-adamantyl-IAA-replicate-1	5-adamantyl-IAA-replicate-2	gene name	gene product description	chr	start coordinate	end coordinate	strand
SPAC17A2.01	6503.18	0.480752	0.0577036	8.3314	7.9892e-17	2.02606e-13	5270.44	5587.51	7330.6	7824.19	bsu1	plasma membrane high-affinity import carrier for pyridoxine, pyridoxal, and pyridoxamine Bsu1	I	3550152	3551732	+
SPAC5H10.01	929.054	-0.736959	0.0945755	-7.79228	6.58128e-15	8.34507e-12	1181.4	1141.32	687.882	705.624	dgc1	mitochondrial D-glutamate cyclase Dgc1 (predicted)	I	146974	147879	+
SPBC660.05	5097.69	-0.45659	0.0597583	-7.6406	2.16205e-14	1.82765e-11	6119.86	5676.57	4385.73	4208.62	SPBC660.05	WW domain containing conserved fungal protein	II	202536	202967	+
SPCC63.14	3032.28	0.427549	0.0634475	6.73862	1.59894e-11	1.01373e-08	2565.14	2606.92	3393.74	3563.3	eis1	eisosome assembly protein eis1	III	862712	866266	+
SPCC18B5.01c	1312.23	0.548333	0.0849696	6.45329	1.09449e-10	5.55126e-08	1053.88	1077.43	1495.27	1622.33	bfr1	plasma membrane brefeldin A efflux transporter Bfr1	III	709415	714007	-
SPAC9E9.09c	6842.45	-0.350636	0.0557352	-6.29111	3.15212e-10	1.33229e-07	7954.66	7386.12	6042.28	5986.75	atd1	aldehyde dehydrogenase (predicted)	I	4453560	4455071	-
SPCC1223.03c	3530.82	-0.420028	0.0683631	-6.14408	8.04297e-10	2.91385e-07	4113.28	3969.92	3197.48	2842.6	gut2	glycerol-3-phosphate dehydrogenase Gut2 (predicted)	III	1840687	1842636	-
SPAC11D3.15	1073.33	-0.531006	0.088448	-6.0036	1.92994e-09	6.1179e-07	1259.38	1277.81	869.568	886.554	SPAC11D3.15	5-oxoprolinase (ATP-hydrolizing) (predicted)	I	136331	140284	+
SPCC794.04c	1307.9	-0.481696	0.0824343	-5.8434	5.11472e-09	1.44122e-06	1497.56	1550.8	1103.72	1079.54	SPCC794.04c	amino acid transmembrane transporter (predicted)	III	248551	250194	-
SPAC23D3.12	1246.54	-0.497247	0.0872246	-5.70076	1.19272e-08	3.02474e-06	1496.5	1422.05	989.073	1078.54	SPAC23D3.12	plasma membrane inorganic phosphate transmembrane transporter (predicted)	I	4362901	4364580	+
SPCC191.11	2023.94	-0.430056	0.0779188	-5.51929	3.40378e-08	7.84727e-06	2400.73	2246.81	1817.83	1630.37	inv1	external invertase, beta-fructofuranosidase Inv1	III	1724306	1726051	+
SPBC1683.09c	1502.62	-0.41277	0.0781421	-5.2823	1.27573e-07	2.69605e-05	1719.93	1712.46	1313.58	1264.49	frp1	plasma membrane ferric-chelate reductase Frp1	II	160461	162155	-
SPBC14F5.04c	55144.3	0.220555	0.042154	5.23213	1.67568e-07	3.26887e-05	50498.6	51375.7	59705.8	58997	pgk1	phosphoglycerate kinase Pgk1 (predicted)	II	4158172	4159416	-
SPAC19D5.01	592.059	-0.600999	0.115505	-5.20322	1.95865e-07	3.31143e-05	744.037	683.434	467.332	473.432	pyp2	tyrosine phosphatase Pyp2	I	5202823	5204958	+
SPCC569.05c	1162.5	0.45201	0.086746	5.21073	1.88094e-07	3.31143e-05	952.704	1010.63	1341.76	1344.91	SPCC569.05c	plasma membrane spermidine family transmembrane transporter (predicted)	III	2424336	2426066	+
SPBC4F6.09	2151.68	-0.374184	0.0723736	-5.17016	2.33888e-07	3.70713e-05	2521.93	2336.84	1841.15	1906.79	str1	plasma membrane siderophore-iron transmembrane transporter Str1	II	2705523	2707361	+
SPAC13F5.03c	2010.13	-0.442989	0.0867372	-5.10726	3.26864e-07	4.8285e-05	2332.23	2301.02	1868.36	1538.9	gld1	mitochondrial glycerol dehydrogenase Gld1	I	2175008	2176360	-
SPBC21C3.19	6541.04	0.268077	0.0525816	5.0983	3.42717e-07	4.8285e-05	6047.14	5823.71	7186.81	7106.5	rtc3	SBDS family protein Rtc3 (predicted)	II	3830167	3830487	+
SPAC13G7.02c	16224.6	0.269873	0.0536153	5.03351	4.81588e-07	6.42793e-05	14664.7	14758.7	18564.1	16910.9	ssa1	Hsp70 family heat shock protein Ssa1	I	2295819	2297753	-
SPAC17G6.13	4376.84	0.27809	0.0569555	4.88259	1.04703e-06	0.000120694	3927.8	3984.44	4716.07	4879.06	slt1	Schizosaccharomyces specific protein Slt1	I	3615626	3616927	+
SPBC3E7.02c	7325.75	0.271667	0.0554874	4.89602	9.77995e-07	0.000120694	6742.7	6534.25	8296.36	7729.7	hsp16	heat shock protein Hsp16	II	2660490	2660921	-
SPCP31B10.06	1242.4	0.411576	0.0842416	4.88566	1.03082e-06	0.000120694	1045.45	1087.11	1439.89	1397.18	tcb2	tricalbin, C2 domain protein (phospholipid binding) ER-plasma membrane tethering protein Tcb2 (predicted)	III	533322	536888	+
SPBC359.06	997.304	-0.475928	0.0980501	-4.85392	1.21043e-06	0.000133463	1198.26	1122.92	888.028	780.006	mug14	adducin, involved in actin cytoskeleton organization	II	128825	129598	+
SPAC1A6.03c	4186.3	0.259554	0.0575948	4.50654	6.58921e-06	0.00069626	3739.15	3881.83	4584.91	4539.32	SPAC1A6.03c	lysophospholipase (predicted)	I	1070139	1072127	-
SPBC1105.14	1750.98	-0.391094	0.0873145	-4.47914	7.49431e-06	0.000760223	1964.43	2009.64	1649.75	1380.09	rsv2	DNA-binding transcription factor Rsv2	II	3532931	3534844	+
SPAC1F8.01	734.74	-0.547185	0.123617	-4.42644	9.58016e-06	0.000899825	865.233	879.946	679.137	514.643	ght3	plasma membrane gluconate:proton symporter Ght3	I	82936	84603	+
SPCC417.16	8882.52	-0.261107	0.0589769	-4.42727	9.54338e-06	0.000899825	10128.8	9240.88	8336.19	7824.19	SPCC417.16	mitochondrial protein (predicted)	III	1703167	1703325	-
SPCPB16A4.03c	6257.87	0.231129	0.0525215	4.40065	1.07927e-05	0.000977509	5730.98	5784.02	6658.27	6858.23	ade10	bifunctional IMP cyclohydrolase/phosphoribosylaminoimidazolecarboxamideformyltransferase	III	947832	949589	-
SPAC513.07	891.295	0.443246	0.101	4.38857	1.14098e-05	0.000997771	755.629	755.069	961.868	1092.61	SPAC513.07	flavonol reductase/cinnamoyl-CoA reductase family	I	2921568	2922578	+
SPAC11D3.14c	751.354	-0.44078	0.102266	-4.31013	1.63162e-05	0.00130359	875.771	854.777	630.558	644.309	SPAC11D3.14c	5-oxoprolinase (ATP-hydrolizing) (predicted)	I	131319	135101	-
SPAC926.04c	35078.8	0.187299	0.0434737	4.30833	1.64491e-05	0.00130359	33254	32356.6	37520.6	37184	hsp90	Hsp90 chaperone	I	3888774	3890888	-
SPCC794.12c	12804.4	0.202054	0.0467814	4.3191	1.56666e-05	0.00130359	11809.7	12008.5	13823.7	13575.7	mae2	malic enzyme, malate dehydrogenase (oxaloacetate decarboxylating), Mae2	III	275514	277211	-
SPAC4H3.10c	33075.8	0.188477	0.0440463	4.27907	1.8768e-05	0.00144229	30419.1	31416.7	35031.4	35436	pyk1	pyruvate kinase	I	3845013	3846542	-
SPAC1705.03c	9014.94	-0.219708	0.0534909	-4.10739	4.00162e-05	0.00298474	9786.3	9614.54	8627.67	8031.25	ecm33	extracellular leucine-rich repeat domain, receptor L domain-like Ecm33	I	1569995	1571260	-
SPCC31H12.06	806.79	0.402031	0.0990678	4.05814	4.94649e-05	0.00358409	689.235	700.859	912.318	924.75	mug111	major facilitator family transmembrane transporter Mug111 (predicted)	III	632248	633654	+
SPAC19B12.02c	1414.23	-0.343684	0.0850753	-4.03977	5.35047e-05	0.00376911	1508.1	1655.34	1289.29	1204.19	gas1	cell wall 1,3-beta-glucanosyltransferase Gas1	I	4878825	4880453	-
SPBC16E9.16c	5548.66	0.237955	0.0591991	4.01957	5.83044e-05	0.00399621	5211.42	4973.77	6230.77	5778.68	lsd90	Lsd90 protein	II	1947985	1950255	-
SPAC23E2.03c	669.115	-0.46095	0.116804	-3.94635	7.93505e-05	0.0052956	842.047	708.603	551.86	573.948	ste7	arrestin family meiotic suppressor protein Ste7	I	451210	452919	-
SPBPB2B2.12c	799.292	-0.419684	0.10834	-3.87376	0.00010717	0.00696879	968.512	861.553	724.802	642.299	gal10	UDP-glucose 4-epimerase/aldose 1-epimerase Gal10	II	4485277	4487418	-
SPCC576.03c	10915.8	0.184673	0.0478062	3.86296	0.000112022	0.00710221	10083.5	10352.2	11596.8	11630.7	tpx1	thioredoxin peroxidase Tpx1	III	2085036	2085614	-
SPBC1711.08	3748.48	0.226405	0.058757	3.85324	0.000116563	0.00720986	3406.13	3503.33	4015.56	4068.9	aha1	chaperone activator Aha1	II	2149125	2150510	+
SPCC645.14c	9466.2	0.190089	0.0495971	3.83266	0.000126767	0.0076543	9016.97	8670.71	10078.2	10098.9	sti1	chaperone activator Sti1 (predicted)	III	1261606	1263381	-
SPAPB1A10.05	723.237	0.391156	0.103608	3.77536	0.000159776	0.009258	629.164	622.448	817.102	824.234	SPAPB1A10.05	Schizosaccharomyces specific protein	I	1867135	1868019	+
SPCC663.03	1188.46	0.323859	0.0858123	3.77404	0.000160628	0.009258	1085.49	1026.12	1318.44	1323.8	pmd1	leptomycin transmembrane transporter Pmd1	III	1635974	1640062	+
SPACUNK4.17	1612.76	0.291016	0.0774978	3.75515	0.000173235	0.00976275	1467	1434.63	1827.55	1721.84	SPACUNK4.17	NAD binding dehydrogenase family protein, human DHDH ortholog, unknown biological role, implicated in carbohydrate metabolic process	I	2873032	2874252	-
SPAC1B3.03c	4999.77	0.207644	0.0554874	3.74219	0.000182423	0.0100571	4575.93	4704.66	5280.56	5437.93	wis2	cyclophilin family peptidyl-prolyl cis-trans isomerase Wis2	I	4929945	4931015	-
SPAC1F8.03c	777.858	-0.375371	0.100523	-3.73417	0.000188333	0.010162	879.987	877.041	684.967	669.439	str3	plasma membrane heme transmembrane transporter Str3	I	88367	90259	-
SPAC11D3.13	576.825	0.450551	0.121125	3.71971	0.000199448	0.0105375	462.652	512.092	706.342	626.217	hsp3104	ThiJ domain protein, implicated in cellular detoxification	I	130329	130997	+
SPAC222.11	2432.17	0.245027	0.0662312	3.69957	0.000215963	0.0111772	2199.44	2252.62	2660.2	2616.44	hem13	coproporphyrinogen III oxidase Hem13 (predicted)	I	966430	967368	+
SPAC11D3.18c	741.699	-0.386071	0.104537	-3.69317	0.000221479	0.0112334	807.269	873.169	647.075	639.284	SPAC11D3.18c	carboxylic acid transmembrane transporter (predicted)	I	144862	146358	-
SPBC29B5.01	1078.37	0.327221	0.0894032	3.66006	0.000252156	0.0125386	927.411	985.462	1213.51	1187.1	atf1	DNA-binding transcription factor, Atf-CREB family Atf1	II	1547661	1549361	+
SPAPB24D3.10c	1506.79	-0.290929	0.0797609	-3.64751	0.000264791	0.0129137	1639.83	1676.64	1402.97	1307.72	agl1	maltose alpha-glucosidase Agl1	I	2968079	2970988	-
SPCC1739.13	57258.6	0.161055	0.044386	3.6285	0.000285071	0.0136404	55060.8	53071.7	59592.1	61309.9	ssa2	Hsp70 family heat shock protein Ssa2	III	2057243	2059186	+
SPCC576.11	3705.61	0.210551	0.0586114	3.59232	0.000327745	0.0153919	3410.34	3460.73	3940.75	4010.6	rpl15	60S ribosomal protein L15 (predicted)	III	2099879	2100484	+
SPBC83.17	3057.41	0.234235	0.0662816	3.53394	0.00040942	0.018878	2686.33	2932.18	3281.04	3330.1	mbf1	multiprotein bridging factor Mbf1 (predicted)	II	1542599	1543045	+
SPBC1683.08	4218.14	-0.21713	0.0632505	-3.43286	0.000597248	0.0270468	4386.23	4683.36	4045.68	3757.3	ght4	plasma membrane hexose:proton symporter, unknown specificity Ght4	II	157555	159228	+
SPBPB7E8.02	940.387	-0.322832	0.0941876	-3.42754	0.000609072	0.0270984	1077.06	1013.53	832.648	838.306	SPBPB7E8.02	PSP1 family protein	II	3499132	3501381	+
SPAC11E3.13c	741.066	-0.349906	0.105457	-3.31798	0.000906695	0.0396445	818.862	842.192	683.024	620.186	gas5	cell wall protein 1,3-beta-glucanosyltransferase Gas5 (predicted)	I	5307065	5308597	-
SPBC24C6.09c	1183.65	0.280223	0.0854772	3.27833	0.00104423	0.0448844	1064.42	1073.55	1270.83	1325.81	SPBC24C6.09c	phosphoketolase family protein (predicted)	II	2335262	2337739	-
SPBPB2B2.10c	1741.05	-0.294424	0.0912883	-3.22521	0.00125878	0.0532046	1992.88	1844.11	1711.93	1415.27	gal7	galactose-1-phosphate uridylyltransferase Gal7	II	4482569	4483678	-
SPAC9E9.13	8043.86	0.158076	0.0494891	3.19415	0.00140245	0.058305	7635.33	7571.98	8435.29	8532.83	wos2	p23 homolog, predicted co-chaperone Wos2	I	4468236	4468995	-
SPAC806.11	3081.84	0.193747	0.0612662	3.16238	0.00156487	0.0629921	2866.54	2883.78	3279.1	3297.94	SPAC806.11	dubious	I	237212	237430	-
SPAC328.03	8540.02	0.161356	0.0509816	3.16499	0.00155089	0.0629921	8115.9	8010.51	9218.39	8815.28	tps1	alpha,alpha-trehalose-phosphate synthase [UDP-forming]	I	3479314	3480855	+
SPBC2F12.14c	8483.81	0.165866	0.0528107	3.14076	0.0016851	0.0637822	7739.67	8252.51	8931.77	9011.29	gua1	IMP dehydrogenase Gua1	II	1706975	1708881	+
SPBP4H10.11c	1277.62	-0.265266	0.0843	-3.14669	0.0016513	0.0637822	1436.43	1353.32	1139.67	1181.07	lcf2	long-chain-fatty-acid-CoA ligase	II	2892339	2894408	-
SPBC11C11.06c	4852.41	0.174544	0.0555221	3.14368	0.00166838	0.0637822	4573.82	4544.93	5233.92	5056.97	SPBC11C11.06c	Schizosaccharomyces specific protein	II	3359360	3359896	-
SPCC364.07	6634.33	0.167053	0.0529967	3.15214	0.00162076	0.0637822	6148.32	6352.26	6903.11	7133.64	ser3	D-3 phosphoglycerate dehydrogenase Ser3 (predicted)	III	470668	472068	-
SPBC660.07	3570.89	0.184758	0.0590139	3.13076	0.00174357	0.065025	3351.33	3333.92	3830.96	3767.35	ntp1	alpha,alpha-trehalase Ntp1	II	207078	209285	+
SPAC18G6.14c	8417.81	0.154407	0.049589	3.11375	0.00184729	0.065982	7944.12	7991.14	8757.86	8978.12	rps7	40S ribosomal protein S7 (predicted)	I	2241936	2242523	-
SPBC18H10.12c	9650.02	0.162011	0.0518946	3.12193	0.00179672	0.065982	8816.73	9399.64	10179.3	10204.4	rpl701	RNase MRP subunit, ribosomal protein L7-like Rpl701	II	1791019	1792215	-
SPBC3B9.01	2202.15	0.220694	0.070869	3.11411	0.00184499	0.065982	2075.08	1993.19	2297.8	2442.55	fes1	Hsp70 nucleotide exchange factor Fes1 (predicted)	II	3990667	3991530	+
SPAC343.12	9404.35	0.160283	0.052603	3.04703	0.00231116	0.0814044	8827.27	8937.88	10258	9594.28	rds1	ferritin related conserved fungal protein	I	1668071	1669279	+
SPBC16G5.14c	6381.86	0.157346	0.0520243	3.02448	0.0024906	0.0865229	5958.62	6109.28	6706.85	6752.68	rps3	40S ribosomal protein S3 (predicted)	II	4238325	4239326	-
SPBC8D2.01	1393.76	-0.243902	0.0810685	-3.00859	0.00262459	0.0898977	1554.47	1468.51	1280.55	1271.53	gsk31	serine/threonine protein kinase Gsk31 (predicted)	II	1358692	1360439	+
SPBC1604.05	14649.9	0.142707	0.0474951	3.00468	0.00265865	0.0898977	13641.4	14209.8	15483.2	15265.4	pgi1	glucose-6-phosphate isomerase (predicted)	II	3921802	3923454	-
SPBC3E7.10	624.565	0.332294	0.110774	2.99974	0.00270206	0.0901636	565.932	540.165	697.597	694.568	fma1	methionine aminopeptidase Fma1 (predicted)	II	2678873	2680173	+
SPBC106.08c	622.295	0.332232	0.111328	2.98427	0.00284257	0.0901808	535.369	566.302	686.91	700.599	mug2	DUF1773 family protein	II	387841	388731	-
SPBC28F2.12	2987.84	0.194918	0.0651048	2.99391	0.00275427	0.0901808	2732.7	2839.25	3093.52	3285.88	rpb1	RNA polymerase II large subunit Rpb1	II	1591154	1596710	+
SPBC24C6.04	2702.79	0.199376	0.0668145	2.98403	0.00284482	0.0901808	2461.86	2570.14	2806.91	2972.27	put2	delta-1-pyrroline-5-carboxylate dehydrogenase Put2 (predicted)	II	2325256	2326902	+
SPCC1393.08	1352.95	-0.243269	0.081321	-2.99147	0.00277639	0.0901808	1438.54	1494.65	1225.17	1253.44	fil1	DNA-binding transcription factor, zf-GATA type	III	812655	814328	+
SPCC830.07c	5000.72	0.160709	0.0541642	2.96708	0.00300643	0.0941274	4741.39	4703.69	5276.67	5281.13	psi1	Hsp40 family DNAJ domain protein Psi1	III	2193953	2195092	-
SPBC2G2.04c	5259.54	0.182471	0.0616147	2.96149	0.00306154	0.0946836	4722.42	5131.56	5766.35	5417.83	mmf1	mitochondrial matrix protein, YjgF family protein Mmf1, reactive intermediate imine deaminase A homolog Mmf1	II	3442191	3442679	-
SPAC17A2.09c	1027.14	-0.271159	0.0917761	-2.95457	0.00313107	0.0956674	1144.51	1102.59	962.84	898.616	csx1	RNA-binding protein Csx1	I	3570447	3572345	-
SPAC17C9.16c	2999.31	0.206268	0.0700676	2.94384	0.00324171	0.0967208	2931.88	2639.84	3300.47	3125.05	mfs1	plasma membrane spermidine transmembrane transporter Mfs1 (predicted)	I	4472611	4474259	+
SPBC12C2.04	3244.64	0.189755	0.0644587	2.94383	0.00324182	0.0967208	2972.99	3089.97	3575.43	3340.16	SPBC12C2.04	NAD binding dehydrogenase family protein	II	2469061	2470215	-
SPCC550.06c	4206.81	0.16956	0.0578532	2.93086	0.00338021	0.0996768	3881.43	4037.68	4410.02	4498.1	hsp10	mitochondrial heat shock protein Hsp10 (predicted)	III	1195418	1195732	-
SPBPB2B2.13	1370.81	-0.495865	0.169963	-2.91749	0.00352866	0.102858	1716.76	1491.74	1249.46	1025.27	gal1	galactokinase Gal1	II	4488491	4490050	+
SPBP8B7.16c	1140.04	0.247302	0.0859447	2.87746	0.00400894	0.11553	1046.5	1038.7	1243.63	1231.32	dbp2	ATP-dependent RNA helicase Dbp2	II	3662854	3665301	-
SPAC3C7.11c	7165.13	0.149459	0.0526488	2.8388	0.0045284	0.122555	6639.42	6948.57	7617.22	7455.29	cnx1	calnexin Cnx1	I	2086615	2088297	-
SPAPB24D3.07c	835.94	0.283238	0.0998094	2.83779	0.00454265	0.122555	720.851	787.014	917.175	918.719	SPAPB24D3.07c	Schizosaccharomyces pombe specific protein	I	2958024	2958926	-
SPAC9E9.03	4847.73	0.172972	0.0608585	2.8422	0.0044803	0.122555	4346.19	4767.58	5136.77	5140.4	leu2	3-isopropylmalate dehydratase Leu2	I	4440096	4442372	+
SPBC106.17c	1708.48	0.233987	0.0823638	2.8409	0.00449863	0.122555	1475.43	1664.06	1789.66	1904.78	cys2	homoserine O-acetyltransferase (predicted)	II	411120	412634	-
SPBC16E9.13	2385.52	0.190075	0.0665892	2.85445	0.0043112	0.122555	2200.49	2256.49	2560.12	2524.97	ksp1	serine/threonine protein kinase Ksp1 (predicted)	II	1943227	1944651	+
SPBC16D10.08c	8054.13	0.142048	0.049968	2.84277	0.00447229	0.122555	7559.46	7755.91	8424.61	8476.54	hsp104	heat shock protein, disaggregase Hsp104	II	3612359	3615076	-
SPBC16H5.02	7209.03	0.142875	0.050771	2.81411	0.00489126	0.130571	6845.98	6858.54	7478.28	7653.31	pfk1	6-phosphofructokinase pfk1	II	2297466	2300294	-
SPAC7D4.03c	1003.05	-0.256566	0.0915179	-2.80345	0.00505594	0.133561	1067.58	1116.15	898.715	929.776	ahk1	scaffold protein, MAP kinase signalling pathway, Ahk1 (predicted)	I	2634211	2636871	+
SPBC29A10.08	6937.52	0.142347	0.051011	2.79051	0.0052625	0.137584	6643.64	6547.8	7333.52	7225.11	gas2	cell wall 1,3-beta-glucanosyltransferase Gas2	II	2554047	2555426	+
SPAC1F12.07	2433.69	0.195437	0.0704244	2.77514	0.00551782	0.139932	2164.66	2372.66	2596.07	2601.36	ser1	phosphoserine aminotransferase (predicted)	I	3815853	3817022	+
SPAC1039.01	2050.81	0.207231	0.074662	2.77559	0.00551011	0.139932	1861.15	1945.75	2101.54	2294.79	SPAC1039.01	amino acid transmembrane transporter (predicted)	I	5445350	5447053	+
SPBC14F5.05c	26623.3	0.122455	0.0440936	2.77717	0.00548347	0.139932	25547	25441	27367.6	28137.5	sam1	S-adenosylmethionine synthetase	II	4162528	4163676	-
SPAC1565.01	3111.82	0.176944	0.0640809	2.76126	0.00575782	0.144573	2911.86	2930.25	3192.63	3412.53	rcf2	cytochrome c oxidase assembly protein Rcf2	I	1291278	1292006	+
SPAC5H10.03	1554.21	0.247785	0.0899033	2.75613	0.00584901	0.145422	1395.33	1446.25	1543.85	1831.41	SPAC5H10.03	phosphoglycerate mutase/6-phosphofructo-2-kinase family	I	151913	152572	+
SPAC144.11	1479.49	0.220366	0.0801367	2.74988	0.00596171	0.145878	1333.15	1399.78	1551.62	1633.39	rps1102	40S ribosomal protein S11 (predicted)	I	4674612	4675070	+
SPBC18H10.14	4137.3	0.169284	0.0616988	2.74372	0.00607475	0.145878	3729.67	4058.98	4375.04	4385.53	rps1601	40S ribosomal protein S16 (predicted)	II	1793947	1794540	+
SPCC1393.10	1533.27	-0.228749	0.0833765	-2.74356	0.0060777	0.145878	1749.43	1560.48	1435.03	1388.13	ctr4	plasma membrane copper transporter complex subunit Ctr4	III	818459	819328	+
SPCC622.12c	17302	-0.133901	0.0488245	-2.7425	0.00609743	0.145878	17878	18329.8	16037	16963.1	gdh1	NADP-specific glutamate dehydrogenase Gdh1 (predicted)	III	1419457	1420812	-
SPAC9.10	6454.91	0.140788	0.0514808	2.73476	0.00624257	0.146585	6129.35	6150.91	6723.36	6816.01	thi9	plasma membrane thiamine/proton high affinity transmembrane transporter Thi9	I	1482834	1484609	+
SPAC869.10c	2435.15	-0.180377	0.0659048	-2.73694	0.0062014	0.146585	2582	2592.4	2305.57	2260.61	put4	plasma membrane proline transmembrane transporter Put4 (predicted)	I	5493222	5494880	+
SPBC685.07c	4270.29	0.171467	0.0628678	2.72742	0.00638314	0.148511	3865.62	4167.4	4662.63	4385.53	rpl2701	60S ribosomal protein L27	II	2780199	2780653	-
SPAC24C9.12c	51574	0.118507	0.0436207	2.71676	0.00659248	0.151987	49870.5	49043.7	52773.5	54608.5	shm1	serine hydroxymethyltransferase Shm1 (predicted)	I	3069614	3071017	-
SPAC1F7.07c	2039.36	-0.198419	0.0732686	-2.70811	0.00676678	0.1546	2147.8	2211	1974.26	1824.37	fip1	plasma membrane iron transmembrane transporter Fip1	I	4233303	4234496	-
SPBC27.04	894.611	-0.292763	0.10834	-2.70226	0.00688699	0.155941	1006.45	964.165	885.113	722.712	uds1	septation protein Uds1	II	1566403	1569561	+
SPAPJ698.02c	6721.16	0.141502	0.0527141	2.68433	0.00726743	0.163099	6250.54	6532.31	7027.47	7074.34	rps002	40S ribosomal protein S0B	I	4036723	4037586	-
SPAC1399.01c	3389.01	-0.164534	0.0615458	-2.67336	0.00750961	0.167056	3674.87	3489.77	3182.91	3208.48	SPAC1399.01c	nucleobase transmembrane transporter (predicted)	I	1852627	1854432	+
SPAC4G9.20c	956.719	0.24606	0.0929506	2.64721	0.00811584	0.178972	857.855	892.53	1023.08	1053.41	ymc1	mitochondrial carrier, glutamate/glycine (predicted)	I	2288689	2289986	-
SPBC4F6.17c	3918	0.156562	0.0601373	2.60341	0.00923003	0.201788	3737.05	3674.67	4250.68	4009.59	hsp78	mitochondrial heatshock protein Hsp78 (predicted)	II	2723235	2725646	-
SPBC1105.03c	601.999	-0.294334	0.113202	-2.60008	0.00932013	0.202016	641.811	684.402	546.03	535.752	mrpl16	mitochondrial ribosomal protein subunit L16 (predicted)	II	3508286	3508933	-
SPAC25G10.09c	1411.08	0.213566	0.0828766	2.57692	0.00996843	0.214237	1317.35	1296.2	1448.63	1582.13	pan1	actin cortical patch component, with EF hand and WH2 motif Panl (predicted)	I	4313221	4318605	-
SPAC8E11.02c	6232.52	0.153775	0.0602235	2.55341	0.0106673	0.22733	5685.66	6115.09	6808.86	6320.46	rad24	14-3-3 protein Rad24	I	3384268	3385487	+
SPBC36.10	816.7	-0.253207	0.0994459	-2.54618	0.010891	0.230162	893.687	882.85	767.551	722.712	ups2	phosphatidic acid transfer protein Ups2 (predicted)	II	861231	861785	+
SPAC3A12.18	7687.64	0.13128	0.0516841	2.54004	0.0110838	0.232303	7180.06	7495.51	8102.04	7972.95	zwf1	glucose-6-phosphate 1-dehydrogenase Zwf1	I	1454911	1456529	+
SPAPB17E12.13	4733.49	0.142459	0.0561662	2.53638	0.0112006	0.232825	4414.69	4584.62	4925.93	5008.73	rpl1802	60S ribosomal protein L18 (predicted)	I	1285627	1286261	+
SPBC2G5.06c	5252.45	0.137324	0.05464	2.51325	0.0119623	0.246638	4945.84	5058.96	5425.33	5579.66	hmt2	sulfide-quinone oxidoreductase	II	2589100	2590479	-
SPAC4G9.12	3149.76	-0.16134	0.0643839	-2.50591	0.0122136	0.249789	3228.02	3422.98	3039.12	2908.94	idn1	gluconokinase	I	2277199	2277780	+
SPBC336.03	559.348	-0.297621	0.119655	-2.48733	0.0128705	0.261117	608.087	625.352	471.218	532.736	efc25	Ras1 GEF Efc25	II	2740202	2743165	+
SPAP7G5.06	912.884	-0.242436	0.0981328	-2.47049	0.0134927	0.271567	959.028	1019.34	797.671	875.497	per1	plasma membrane amino acid transmembrane transporter Per1	I	3749695	3751446	+
SPBP4H10.15	4306.78	0.141929	0.0575537	2.46602	0.0136623	0.272815	4004.73	4184.82	4504.26	4533.28	aco2	aconitate hydratase/mitochondrial ribosomal protein subunit L21, fusion protein	II	2903085	2905881	+
SPBC215.05	11379.6	0.128944	0.0523509	2.46307	0.0137753	0.272923	10779	10964	12319.7	11455.8	gpd1	glycerol-3-phosphate dehydrogenase Gpd1	II	4035814	4036971	+
SPAC227.18	2783.44	0.159109	0.0647739	2.45637	0.0140348	0.27591	2583.05	2676.62	2881.72	2992.37	lys3	saccharopine dehydrogenase Lys3	I	530522	531628	+
SPBC28F2.03	10558.1	0.122852	0.0501951	2.44749	0.0143855	0.278486	9932.79	10284.4	11228.6	10786.4	ppi1	cyclophilin family peptidyl-prolyl cis-trans isomerase Cyp2	II	1576329	1576817	+
SPCC548.06c	6731.74	-0.129806	0.0530295	-2.44781	0.0143727	0.278486	6903.94	7164.44	6529.05	6329.51	ght8	plasma membrane hexose:proton symporter, unknown specificity Ght8 (predicted)	III	226757	228400	-
SPAC1805.16c	3097.28	0.149727	0.0613595	2.44016	0.0146808	0.279928	2913.97	2959.29	3275.21	3240.65	SPAC1805.16c	purine nucleoside phosphorylase (predicted)	I	2800953	2801900	-
SPBC1105.05	1047.31	-0.221984	0.090924	-2.44142	0.0146297	0.279928	1152.94	1102.59	937.579	996.116	exg1	cell wall glucan 1,6-beta-glucosidase Exg1	II	3515138	3516361	+
SPAC31G5.04	1941.06	0.175488	0.0720745	2.43481	0.0148994	0.280077	1785.27	1860.57	2028.67	2089.73	lys12	homoisocitrate dehydrogenase Lys12	I	2993498	2994586	+
SPAC144.12	1109.54	-0.223148	0.0916583	-2.43457	0.0149095	0.280077	1175.07	1214.89	968.669	1079.54	rki1	ribose 5-phosphate isomerase Rki1 (predicted)	I	4676624	4677448	+
SPAC29A4.12c	767.808	-0.277616	0.114379	-2.42716	0.0152176	0.283764	867.34	816.055	764.637	623.201	mug108	Schizosaccharomyces specific protein Mug108	I	5124780	5125232	+
SPAC26H5.09c	7752.29	0.150349	0.0621209	2.42027	0.015509	0.286907	7186.38	7511	8638.35	7673.41	SPAC26H5.09c	oxidoreductase involved in NADPH regeneration (predicted)	I	4137573	4138682	-
SPAC25B8.03	983.245	-0.250675	0.103677	-2.41785	0.0156124	0.286907	982.213	1153.9	854.022	942.843	psd2	phosphatidylserine decarboxylase Psd2	I	4158828	4160378	+
SPAC6F6.07c	9304.23	0.126966	0.0528027	2.40454	0.016193	0.288639	8632.3	9156.66	9534.16	9893.82	rps13	40S ribosomal protein S13	I	2745955	2746640	-
SPBP4H10.13	3307.27	0.145688	0.0605405	2.40646	0.0161081	0.288639	3101.56	3179.03	3495.76	3452.73	rps2302	40S ribosomal protein S23 (predicted)	II	2897100	2897531	+
SPCC757.03c	2716.5	0.16281	0.0676513	2.40661	0.0161015	0.288639	2624.15	2503.34	2965.27	2773.24	hsp3101	glyoxylase III Hsp3101	III	47741	48475	-
SPCC4B3.03c	2536.63	0.158081	0.065774	2.4034	0.0162434	0.288639	2384.92	2410.41	2626.19	2725	mam301	multi-pass membrane and CBS domain protein, implicated in magnesium homeostasis and endomembrane organization (predicted)	III	1173490	1175529	+
SPCC1827.03c	4620.43	0.14814	0.0616563	2.40267	0.0162758	0.288639	4183.89	4581.72	4792.82	4923.29	pcs60	acetyl-CoA ligase Pcs60 (predicted)	III	2378485	2380023	-
SPAC31G5.03	2871.82	0.161162	0.0673968	2.39124	0.0167915	0.295717	2593.59	2828.6	2997.34	3067.76	rps1101	40S ribosomal protein S11 (predicted)	I	2992657	2993115	+
SPBC19C2.07	38315.3	0.101338	0.0430264	2.35525	0.0185103	0.323739	37187.1	36753.5	39221.9	40099	fba1	fructose-bisphosphate aldolase Fba1	II	1688367	1689443	+
SPBC1271.08c	922.437	0.22669	0.0968396	2.34088	0.0192385	0.334169	873.664	826.704	955.067	1034.31	SPBC1271.08c	Schizosaccharomyces pombe specific protein	II	356910	357332	+
SPBC1289.06c	2248.57	0.171946	0.0737697	2.33084	0.0197617	0.340922	2041.36	2187.76	2481.43	2283.73	ppr8	mitochondrial PPR repeat protein Ppr8	II	4393946	4395436	-
SPBC2G5.05	9969.27	0.111385	0.0480623	2.31751	0.0204758	0.350856	9504.91	9663.91	10298.8	10409.5	SPBC2G5.05	transketolase (predicted)	II	2586521	2588578	+
SPBC8E4.04	2122.65	0.162941	0.0706251	2.30712	0.0210479	0.358239	1954.94	2050.3	2201.61	2283.73	SPBC8E4.04	alditol NADP+ 1-oxidoreductase activity (predicted)	II	4432418	4433395	-
SPAC1751.01c	672.256	-0.250929	0.109548	-2.29059	0.0219869	0.371725	757.737	703.763	633.473	594.051	gti1	gluconate transmembrane transporter inducer Gti1	I	378192	380354	-
SPAC1834.11c	2206.97	0.157911	0.0693223	2.27792	0.0227315	0.379258	2030.82	2141.3	2330.83	2324.94	sec18	secretory pathway protein Sec18 (predicted)	I	4718738	4721116	-
SPBC8D2.03c	3676.11	-0.13424	0.0588889	-2.27955	0.0226342	0.379258	3811.87	3881.83	3468.56	3542.19	hhf2	histone H4 h4.2	II	1364512	1364823	-
SPAC1F8.02c	711.618	-0.256241	0.113296	-2.26169	0.0237168	0.386546	713.474	835.416	671.365	626.217	shu1	cell-surface heme acquisition protein Shu1	I	85598	86278	-
SPAC22H12.01c	1350.06	0.182384	0.0805261	2.2649	0.0235187	0.386546	1261.49	1268.13	1428.23	1442.41	mug35	Schizosaccharomyces specific protein Mug35	I	893719	894423	-
SPAC1399.03	864.109	-0.217912	0.0960863	-2.26788	0.0233364	0.386546	937.95	920.603	794.756	803.125	fur4	plasma membrane uracil transmembrane transporter	I	1841936	1843681	-
SPAPB1E7.09	1663.71	0.168736	0.0746391	2.2607	0.0237781	0.386546	1561.84	1571.12	1751.77	1770.09	ogm2	protein O-mannosyltransferase Ogm2	I	3313641	3315860	+
SPACUNK4.10	4229.73	-0.126232	0.0563573	-2.23986	0.0251003	0.402876	4393.61	4435.55	4036.93	4052.82	gor1	glyoxylate reductase (predicted)	I	2891216	2892527	-
SPCC417.05c	1624.17	-0.176212	0.0785951	-2.24202	0.0249601	0.402876	1690.42	1756.02	1582.71	1467.54	cfh2	SEL1 repeat protein Cfh2	III	1675418	1676956	-
SPAC57A7.09	734.102	-0.240686	0.107597	-2.23692	0.0252915	0.403392	824.131	766.685	707.313	638.278	SPAC57A7.09	ubiquitin-protein ligase E3, human RNF13 family homolog, unknown biological role	I	1525031	1526149	-
SPBC1683.01	1719.39	0.169021	0.0757689	2.23074	0.0256981	0.40393	1569.22	1667.93	1840.18	1800.25	SPBC1683.01	inorganic phosphate transmembrane transporter (predicted)	II	134303	136024	+
SPBC16A3.08c	5728.69	-0.120925	0.0541887	-2.23156	0.0256443	0.40393	6025.01	5912.77	5596.32	5380.64	oga1	Stm1 homolog Oga1	II	4283938	4285122	+
SPCC1739.09c	2178.92	-0.158538	0.0711346	-2.22871	0.0258335	0.40393	2371.22	2226.48	2099.59	2018.37	cox13	cytochrome c oxidase subunit VIa (predicted)	III	2046661	2047335	-
SPCC830.08c	1269.15	0.193834	0.087047	2.22677	0.0259624	0.40393	1235.14	1133.57	1396.17	1311.74	yop1	ER membrane protein DP1/Yop1	III	2196308	2197112	-
SPAC959.07	5959.07	0.120913	0.0544607	2.2202	0.0264055	0.408319	5644.56	5774.34	6352.22	6065.15	rps403	40S ribosomal protein S4 (predicted)	I	3399256	3400044	+
SPCC757.07c	4170.67	0.147074	0.0663847	2.21549	0.0267268	0.410782	4063.75	3853.75	4619.88	4145.29	ctt1	catalase	III	56927	58465	-
SPAC13G6.06c	7711.43	0.140021	0.0636852	2.19865	0.0279029	0.420533	7518.35	7156.7	7573.5	8597.16	gcv2	glycine cleavage complex subunit P (predicted)	I	182976	186071	-
SPAC1F7.10	851.948	0.238424	0.108203	2.20349	0.0275601	0.420533	715.582	847.032	881.227	963.951	SPAC1F7.10	hydantoin racemase family (predicted)	I	4243969	4244685	+
SPAC29B12.01	823.013	0.215298	0.0979486	2.19807	0.0279443	0.420533	756.683	766.685	884.142	884.543	ino80	SNF2 family ATP-dependent 3' to 5' DNA helicase Ino80	I	5403241	5408055	+
SPBC30D10.14	3187.64	0.137042	0.062427	2.19524	0.0281464	0.420533	2996.17	3076.42	3412.2	3265.77	SPBC30D10.14	dienelactone hydrolase family (predicted)	II	3067996	3068745	-
SPBC1105.12	2695.26	0.156647	0.0713774	2.19463	0.0281903	0.420533	2416.54	2680.49	2769.01	2914.97	hhf3	histone H4 h4.3	II	3529767	3530078	+
SPBC1778.10c	1380.67	-0.181657	0.0828793	-2.19182	0.0283926	0.421074	1501.77	1433.66	1338.84	1248.41	ppk21	serine/threonine protein kinase Ppk21 (predicted)	II	3114461	3116386	-
SPCC191.01	1171.68	-0.213599	0.0978166	-2.18367	0.0289867	0.427385	1298.38	1218.76	1179.5	990.085	SPCC191.01	Schizosaccharomyces specific protein	III	1706461	1706997	+
SPBC1683.07	2039.65	-0.156391	0.071719	-2.18061	0.0292126	0.428226	2195.22	2105.48	1975.23	1882.67	mal1	maltase alpha-glucosidase Mal1	II	153562	155301	+
SPBC17D1.01	1734.85	0.160974	0.0739262	2.1775	0.0294435	0.42913	1620.86	1655.34	1850.87	1812.31	spp41	DUF3020 family conserved fungal protein Spp41	II	3326992	3328913	+
SPAC20G8.04c	837.626	0.210796	0.0971932	2.16883	0.0300953	0.436124	776.707	776.366	895.801	901.631	SPAC20G8.04c	mitochondrial electron transfer flavoprotein-ubiquinone oxidoreductase Cir2 (predicted)	I	1396025	1397923	-
SPBC3D6.16	558.794	-0.298124	0.13822	-2.15688	0.0310153	0.446902	600.71	632.128	576.149	426.189	SPBC3D6.16	dubious	II	1296915	1297260	+
SPBP22H7.03	541.822	-0.258944	0.120402	-2.15067	0.0315026	0.451359	574.363	605.991	469.275	517.659	sbg1	plasma membrane-actinomyosin ring linker protein Sbg1	II	1436278	1436823	+
SPCP31B10.08c	3130.27	0.139545	0.064998	2.14691	0.0318005	0.453067	2863.38	3093.85	3311.16	3252.71	rpl35a	60S ribosomal protein L35a	III	540259	540775	-
SPAC32A11.02c	1084.37	-0.192699	0.090978	-2.11808	0.0341682	0.480586	1151.89	1161.64	1060	963.951	SPAC32A11.02c	DUF4449 family conserved fungal protein	I	2447948	2450503	-
SPAC4F8.08	1676.29	-0.16832	0.0794845	-2.11764	0.0342052	0.480586	1862.2	1686.32	1558.42	1598.21	mug114	Schizosaccharomyces pombe specific protein Mug114	I	2664524	2664979	-
SPBC36.04	1737.26	0.157393	0.0744423	2.1143	0.03449	0.480586	1607.16	1677.61	1819.78	1844.47	cys11	cysteine synthase	II	847985	849185	+
SPCC1281.06c	9211.36	0.110368	0.052168	2.11563	0.0343765	0.480586	8595.42	9121.81	9453.51	9674.69	ole1	acyl-coA desaturase (predicted)	III	1392690	1394129	-
SPAC821.12	1115.05	-0.190259	0.0902837	-2.10735	0.0350874	0.483815	1231.98	1145.19	1008.5	1074.52	orb6	serine/threonine protein kinase Orb6	I	1008439	1010160	+
SPCC757.13	794.144	0.215598	0.102317	2.10716	0.0351033	0.483815	770.384	699.891	856.937	849.363	SPCC757.13	dipeptide transmembrane transporter (predicted)	III	78044	79612	+
SPBC725.03	1333.03	-0.210372	0.100664	-2.08986	0.0366307	0.502138	1463.83	1396.88	1374.79	1096.63	SPBC725.03	pyridoxamine 5'-phosphate oxidase (predicted)	II	1207040	1207813	+
SPAC1556.02c	5141.6	0.11494	0.0550842	2.08662	0.0369223	0.503414	5031.21	4843.09	5317.48	5374.61	sdh1	succinate dehydrogenase Sdh1 (predicted)	I	3796400	3798446	-
SPBC119.11c	756.639	0.213917	0.103182	2.07321	0.0381532	0.514662	724.013	677.626	826.818	798.099	pac1	double-strand-specific ribonuclease Pac1	II	737704	738795	-
SPBC21C3.13	6335.16	0.114806	0.0553684	2.07349	0.0381266	0.514662	5994.45	6171.24	6390.11	6784.85	rps1901	40S ribosomal protein S19 (predicted)	II	3818298	3818888	+
SPAC56E4.04c	4316.64	-0.124065	0.0602045	-2.06073	0.0393287	0.527713	4570.66	4433.61	3989.32	4272.95	cut6	acetyl-CoA/biotin carboxylase	I	1246095	1253559	-
SPCC1259.08	1243.58	-0.171705	0.0834244	-2.05821	0.0395697	0.528152	1332.1	1302.98	1156.19	1183.08	SPCC1259.08	DUF2457 family conserved fungal protein	III	1048603	1049787	+
SPCC330.08	771.398	-0.213809	0.104187	-2.05218	0.0401525	0.533124	866.286	790.886	695.654	732.764	alg11	GDP-Man:Man3GlcNAc2-PP-Dol alpha-1,2-mannosyltransferase Alg11	III	124563	125978	+
SPAC1786.02	1741.38	-0.156325	0.0763607	-2.04719	0.0406397	0.534141	1872.74	1798.61	1592.43	1701.74	SPAC1786.02	phospholipase (predicted)	I	3034882	3036816	+
SPCC794.09c	25164.3	0.0903408	0.0441315	2.04708	0.0406503	0.534141	24385.6	24367.4	25611	26293.1	tef101	translation elongation factor EF-1 alpha Ef1a-a	III	268097	269479	-
SPCC132.04c	938.389	0.189662	0.0928055	2.04365	0.0409878	0.535799	872.61	880.914	995.874	1004.16	gdh2	NAD-dependent glutamate dehydrogenase Gdh2	III	1332764	1336084	-
SPAC17C9.13c	648.655	-0.229527	0.11295	-2.03211	0.0421427	0.542507	736.66	664.073	617.928	575.958	cut8	tethering factor for nuclear proteasome Cut8	I	4477850	4478638	+
SPBC1734.11	3425.75	0.125935	0.0618807	2.03513	0.0418377	0.542507	3371.35	3181.94	3548.23	3601.5	mas5	Hsp40 family DNAJ domain protein Mas5 (predicted)	II	1081719	1082942	+
SPBC19G7.05c	759.304	-0.210793	0.103727	-2.03218	0.0421354	0.542507	807.269	821.863	673.308	734.774	bgs1	primary septum and spore wall linear 1,3-beta-glucan synthase catalytic subunit Bgs1	II	2351054	2356243	-
SPAC222.12c	14758.3	0.0932098	0.0462247	2.01645	0.0437529	0.548121	14084	14478.9	15241.2	15229.2	atp2	F1-FO ATP synthase beta subunit Atp2	I	968783	970360	-
SPAC6F6.03c	795.621	-0.21767	0.10778	-2.01957	0.0434277	0.548121	905.28	806.375	777.267	693.562	nog2	ribosome export GTPase Nog2 (predicted)	I	2734109	2736126	-
SPAPB8E5.06c	4502.71	0.116907	0.0580102	2.01528	0.0438756	0.548121	4197.59	4442.32	4659.72	4711.2	rpl302	60S ribosomal protein L3	I	4917825	4918991	-
SPBC3D6.02	1714.28	0.179873	0.0892143	2.01619	0.0437797	0.548121	1524.96	1689.22	1679.87	1963.08	but2	But2 family protein But2, similar to cell surface molecules	II	1269748	1270920	+
SPBC19C7.09c	562.716	-0.237488	0.117734	-2.01715	0.0436796	0.548121	621.787	596.311	539.229	493.535	uve1	endonuclease Uve1	II	2837786	2839585	-
SPBC13A2.03	1763.44	0.156373	0.0775441	2.01656	0.043741	0.548121	1660.91	1674.7	1772.17	1946	SPBC13A2.03	ER phosphatidate cytidylyltransferase	II	3403603	3405150	+
SPAC13G7.05	572.298	-0.231829	0.115554	-2.00624	0.0448302	0.550318	621.787	614.703	544.087	508.612	are1	acyl-coA-sterol acyltransferase Are1	I	2305345	2306958	+
SPAC22F8.04	2098.27	-0.147643	0.0740283	-1.99441	0.046107	0.550318	2212.09	2199.38	2088.91	1892.72	pet1	Golgi phosphoenolpyruvate transmembrane transporter Pet1	I	4789789	4790940	+
SPAC1006.03c	781.221	0.208352	0.104523	1.99337	0.0462215	0.550318	760.899	689.242	810.301	864.44	red1	NURS complex subunit Iss10 Red1	I	5071212	5073872	-
SPBC577.10	2173.45	-0.138826	0.0694057	-2.00021	0.0454777	0.550318	2301.67	2254.56	2114.17	2023.39	pre4	20S proteasome complex subunit beta 7, Pre4	II	769682	770470	+
SPBC25H2.05	3143.17	0.125307	0.0624354	2.00699	0.0447503	0.550318	2943.48	3069.64	3318.93	3240.65	egd2	nascent polypeptide-associated complex alpha subunit Egd2	II	3274957	3275478	-
SPBC887.15c	2031.23	0.150339	0.0751172	2.00139	0.0453506	0.550318	1832.69	2017.39	2097.65	2177.18	sur2	sphingosine hydroxylase/sphingolipid delta-4 desaturase activity Sur2	II	3571380	3572261	-
SPBC32C12.02	1663.21	-0.373368	0.186273	-2.00441	0.0450262	0.550318	1929.65	1824.75	1263.06	1635.4	ste11	DNA-binding transcription factor Ste11	II	3985586	3986992	+
SPBC215.08c	2265.36	0.152853	0.0766542	1.99406	0.0461458	0.550318	2141.48	2149.04	2227.84	2543.06	arg4	arginine specific carbamoyl-phosphate synthase Arg4	II	4041736	4045218	-
SPCC1529.01	1006.13	-0.183692	0.0921267	-1.9939	0.0461627	0.550318	1042.28	1097.75	965.755	918.719	SPCC1529.01	transmembrane transporter (predicted)	III	237554	239250	+
SPCC1442.16c	2600.03	0.131488	0.0658524	1.99671	0.0458569	0.550318	2419.7	2543.03	2720.44	2716.96	zta1	NADPH quinone oxidoreductase/ARE-binding protein (predicted)	III	1794979	1795968	-
SPBP35G2.16c	1228.42	0.169855	0.0854284	1.98827	0.046782	0.554388	1190.88	1121.95	1324.27	1276.56	ecl2	extender of chronological lifespan protein Ecl2	II	962261	962515	-
SPAC17A2.05	1054.29	0.175975	0.088719	1.9835	0.0473111	0.55805	979.051	1000.95	1114.41	1122.77	osm1	fumarate reductase Osm1 (predicted)	I	3560731	3562587	+
SPCC736.04c	1050.29	-0.186399	0.0946454	-1.96944	0.0489024	0.57415	1166.64	1069.68	937.579	1027.28	gma12	alpha-1,2-galactosyltransferase Gma12	III	316725	317852	-
SPAC806.03c	2197.64	0.136489	0.0695814	1.96157	0.0498128	0.574689	2035.04	2151.95	2299.74	2303.83	rps2601	40S ribosomal protein S26 (predicted)	I	235653	236015	-
SPAC17H9.13c	891.253	0.186728	0.095262	1.96015	0.0499782	0.574689	835.724	831.544	930.778	966.967	pro2	glutamate 5-kinase Pro2	I	2027344	2028752	-
SPAC19A8.04	6466.91	0.104208	0.0531871	1.95927	0.0500813	0.574689	6263.19	6204.15	6849.67	6550.65	erg5	C-22 sterol desaturase Erg5	I	2480147	2482110	-
SPBC1289.03c	5328.75	0.109642	0.0557638	1.96619	0.0492769	0.574689	5012.24	5239.98	5614.78	5447.98	spi1	Ran GTPase Spi1	II	4386347	4387316	-
SPCC23B6.04c	1586.56	0.149186	0.0759831	1.96341	0.049598	0.574689	1517.58	1491.74	1664.32	1672.59	pdr16	meiotic sec14 cytosolic factor family, phospholipid-intermembrane transfer protein Pdr16 (predicted)	III	1277873	1280899	-
SPAC14C4.14	6229.75	0.105488	0.0539619	1.95487	0.0505988	0.578012	5871.15	6132.51	6543.62	6371.73	atp1	F1-FO ATP synthase alpha subunit	I	5256781	5258829	+
SPBC530.10c	7585.42	-0.103595	0.0531963	-1.94741	0.0514853	0.585501	8084.29	7632	7379.18	7246.22	anc1	mitochondrial carrier, ATP:ADP antiporter Anc1	II	811413	812381	-
SPAC22F8.05	3091.59	0.125051	0.0643182	1.94425	0.0518652	0.587188	2892.89	3022.21	3312.13	3139.12	SPAC22F8.05	alpha,alpha-trehalose-phosphate synthase (predicted)	I	4792308	4794983	+
SPAC12G12.04	14549.6	0.0880997	0.045403	1.94039	0.0523321	0.588005	14113.5	14097.5	14965.3	15022.2	mcp60	mitochondrial heat shock protein Hsp60/Mcp60	I	340107	341855	-
SPCC576.08c	9831.52	0.105005	0.0541313	1.93982	0.052401	0.588005	9261.47	9685.21	9838.26	10541.1	rps2	40S ribosomal protein S2 (predicted)	III	2095227	2095988	-
SPAC24C9.06c	6518	0.106951	0.0552238	1.93669	0.0527831	0.589682	6429.7	6123.8	6599.97	6918.54	aco1	aconitate hydratase Aco1 (predicted)	I	3048409	3051407	-
SPAC1F5.06	1251.04	0.159371	0.0829186	1.92202	0.054603	0.603456	1190.88	1173.26	1324.27	1315.76	lsh1	ER heat shock protein Lsh1 (predicted)	I	278599	281145	-
SPBC1778.06c	4498.1	0.116135	0.0603811	1.92337	0.0544331	0.603456	4194.43	4439.42	4814.2	4544.34	fim1	fimbrin	II	3106767	3108741	-
SPCC794.03	3632.88	-0.113122	0.0589442	-1.91913	0.0549678	0.603456	3762.34	3787.93	3449.12	3532.14	SPCC794.03	amino acid transmembrane transporter (predicted)	III	245964	247628	+
SPCC622.09	7928.89	0.100417	0.0523036	1.91988	0.0548727	0.603456	7474.09	7831.42	8325.5	8084.53	htb1	histone H2B Htb1	III	1412484	1412864	+
SPAC13G6.14	1140.59	-0.165075	0.0861407	-1.91634	0.0553223	0.604729	1188.77	1222.63	1078.46	1072.51	aps1	diadenosine 5',5'''-p1,p6-hexaphosphate hydrolase Aps1	I	200235	200867	+
SPBC3E7.01	844.748	-0.189104	0.0988335	-1.91336	0.0557019	0.606266	908.442	891.562	759.779	819.208	fab1	1-phosphatidylinositol-3-phosphate 5-kinase Fab1	II	2653545	2659343	-
SPCC622.18	8212.84	0.0956503	0.0500936	1.90943	0.0562064	0.609143	7883	7997.92	8368.25	8602.18	rpl6	60S ribosomal protein L6 (predicted)	III	1437153	1437740	+
SPAC22E12.05c	1042.88	-0.175869	0.0922419	-1.90661	0.0565714	0.61049	1144.51	1068.71	1010.45	947.869	rer1	Rer1 family protein (predicted)	I	5026800	5027407	-
SPAC29E6.09	544.152	-0.225998	0.118685	-1.90419	0.0568856	0.611279	610.194	563.397	498.423	504.592	SPAC29E6.09	Schizosaccharomyces specific protein	I	4417470	4418489	+
SPBC27.08c	6938.06	0.104998	0.0552997	1.8987	0.0576037	0.613794	6452.89	6917.59	7274.25	7107.51	sua1	sulfate adenylyltransferase	II	1571485	1572957	-
SPCC13B11.01	36908.2	0.0810543	0.0426889	1.89872	0.0576012	0.613794	35737	36006.1	37632.4	38257.5	adh1	alcohol dehydrogenase Adh1	III	1591359	1592411	+
SPCC794.01c	4610.51	-0.303156	0.160119	-1.89332	0.0583154	0.618777	4880.5	5305.81	4556.73	3699	gcd1	glucose dehydrogenase Gcd1	III	239781	241208	-
SPCC895.04c	846.92	-0.189145	0.100078	-1.88996	0.0587628	0.620927	891.579	912.859	752.978	830.265	ufe1	SNARE Ufe1 (predicted)	III	1001020	1002264	-
SPCC777.09c	3654.41	0.120257	0.0639548	1.88034	0.060062	0.632021	3346.06	3657.24	3774.6	3839.72	arg1	acetylornithine aminotransferase	III	1613324	1614897	-
SPAC24B11.11c	1030.76	-0.175563	0.0939257	-1.86916	0.0616	0.633468	1109.73	1077.43	1020.16	915.703	sid2	NDR kinase Sid2	I	222029	223852	-
SPAP27G11.05c	911.031	0.177359	0.0948037	1.8708	0.0613722	0.633468	852.586	857.681	991.016	942.843	vps41	HOPS complex subunit Vps41 (predicted)	I	1615930	1618744	-
SPAC1142.05	1330.3	-0.154168	0.0821378	-1.87695	0.0605255	0.633468	1393.22	1409.46	1292.21	1226.3	ctr5	plasma membrane copper transporter complex subunit Ctr5	I	3635765	3636286	+
SPAC29E6.10c	640.877	0.204668	0.109379	1.87118	0.0613198	0.633468	583.848	606.959	679.137	693.562	nst1	conserved fungal NST1 family protein	I	4418954	4422211	-
SPBC17D11.04c	794.816	0.185744	0.0994102	1.86846	0.0616982	0.633468	742.983	744.42	838.477	853.383	nto1	histone acetyltransferase complex PHD finger subunit Nto1 (predicted)	II	3310577	3312880	-
SPCC553.10	26716.4	0.0903044	0.0481574	1.87519	0.0607664	0.633468	25028.5	26731.4	27633.8	27472.1	SPCC553.10	conserved fungal cell surface protein, Kre9/Knh1 family (predicted)	III	283422	284471	-
SPBC26H8.01	199431	0.0917377	0.0491543	1.86632	0.0619966	0.633965	187654	198531	212407	199134	thi2	thiazole biosynthetic enzyme	II	3940574	3941560	+
SPAP14E8.03	640.093	-0.202397	0.109075	-1.85558	0.0635134	0.646868	691.343	678.594	601.411	589.025	bos1	SNARE Bos1 (predicted)	I	1925102	1925932	+
SPBC651.01c	1111.55	0.162665	0.0877495	1.85374	0.0637767	0.64695	1074.95	1023.21	1163.96	1184.08	nog1	ribosome export GTP binding protein Nog1 (predicted)	II	1236884	1239176	-
SPBC11C11.09c	6130.96	0.0973198	0.0525528	1.85185	0.0640476	0.647111	5891.17	5957.3	6420.23	6255.13	rpl502	60S ribosomal protein L5	II	3364746	3365630	-
SPBC1683.10c	2189.1	0.125512	0.0680488	1.84445	0.0651181	0.655315	2080.35	2107.42	2292.94	2275.69	pcl1	vacuolar ferrous iron/manganese transmembrane transporter Pcl1	II	164430	165158	-
SPAC23H4.03c	1413.31	-0.144859	0.0791438	-1.83033	0.0672004	0.659843	1491.24	1477.22	1337.87	1346.92	erv25	COPII-coated vesicle component Erv25 (predicted)	I	1604075	1604858	+
SPAPB1E7.07	3257.29	-0.122943	0.0674351	-1.82313	0.0682831	0.659843	3526.27	3266.16	3004.14	3232.6	glt1	glutamate synthase Glt1	I	3303630	3309965	+
SPAPB18E9.05c	1338.31	-0.151788	0.0832098	-1.82416	0.0681282	0.659843	1416.41	1400.75	1220.31	1315.76	SPAPB18E9.05c	Schizosaccharomyces pombe specific protein	I	3986648	3986920	-
SPBPB21E7.09	1459.16	0.148155	0.0809196	1.83089	0.0671176	0.659843	1348.96	1419.14	1489.44	1579.11	SPBPB21E7.09	L-asparaginase (predicted)	II	76318	77400	+
SPBC106.18	5619.91	0.0986419	0.0539566	1.82817	0.0675237	0.659843	5358.96	5496.51	5890.71	5733.45	rpl2501	60S ribosomal protein L25 (predicted)	II	413556	414221	+
SPBC947.04	635.212	0.205044	0.112528	1.82216	0.0684301	0.659843	582.794	597.279	646.103	714.671	pfl3	cell surface glycoprotein, flocculin Pfl3, DIPSY family	II	669740	672661	-
SPBC16G5.16	961.189	0.172489	0.0944474	1.82629	0.0678062	0.659843	865.233	941.9	1013.36	1024.26	SPBC16G5.16	DNA-binding transcription factor, zf-fungal binuclear cluster type (predicted)	II	4244000	4246860	+
SPCC330.14c	5372.04	0.114764	0.0628171	1.82695	0.0677078	0.659843	4863.64	5451.98	5579.81	5592.73	rpl2402	60S ribosomal protein L24 (predicted)	III	138096	138545	-
SPCC594.04c	679.086	-0.210888	0.115063	-1.8328	0.066832	0.659843	706.097	751.197	681.08	577.969	SPCC594.04c	steroid oxidoreductase superfamily protein (predicted)	III	362699	363733	-
SPCC16C4.13c	3194.52	0.118083	0.0645579	1.82911	0.0673835	0.659843	2985.63	3141.28	3228.57	3422.58	rpl1201	60S ribosomal protein L12.1/L12A	III	691135	691632	-
SPCC162.08c	571.61	0.211199	0.115204	1.83325	0.0667653	0.659843	532.208	527.58	629.587	597.067	nup211	nucleoporin nup211	III	1565642	1571155	+
SPBC3E7.16c	2475.7	0.130491	0.0716896	1.82022	0.0687248	0.660174	2279.53	2447.2	2487.26	2688.81	leu3	2-isopropylmalate synthase Leu3	II	2688592	2690346	-
SPAC1F7.13c	9138.23	0.0959824	0.0527868	1.81831	0.0690175	0.660485	8579.61	9087.93	9266.97	9618.4	rpl801	60S ribosomal protein L8/L2 (predicted)	I	4250657	4251418	-
SPBC1E8.05	4833.28	-0.105349	0.0581839	-1.81062	0.0702004	0.669279	4855.21	5163.51	4723.84	4590.58	SPBC1E8.05	conserved fungal cell surface protein, Kre9/Knh1 family	II	1970914	1971867	+
SPBC947.15c	2080.68	-0.126328	0.06993	-1.80649	0.0708416	0.670352	2184.69	2158.72	1951.91	2027.41	ndi1	internal mitochondrial NADH dehydrogenase (ubiquinone) Ndi1 (predicted)	II	641686	643341	+
SPBC4F6.05c	639.187	-0.198909	0.110101	-1.80661	0.070823	0.670352	697.666	668.913	609.183	580.984	emp46	lectin family glycoprotein receptor Emp46 (predicted)	II	2692018	2693172	-
SPBP8B7.30c	1399.39	0.143257	0.0793893	1.80448	0.0711558	0.670822	1327.88	1332.02	1467.09	1470.55	thi5	DNA-binding transcription factor Thi5	II	3695121	3697694	-
SPBC31F10.16	2029.73	-0.125834	0.0698389	-1.80178	0.0715805	0.672327	2104.59	2131.62	1926.65	1956.05	bch1	exomer complex ChAPs family (Chs5p-Arf1p-binding) protein Bch1	II	3785848	3788046	+
SPAC1A6.04c	28937.6	0.0794956	0.0443614	1.792	0.073133	0.683746	27818.1	28462.2	29356.4	30113.7	plb1	phospholipase B homolog Plb1	I	1074777	1076618	-
SPAC140.02	1654.91	0.152218	0.0850824	1.78906	0.0736052	0.683746	1663.02	1473.35	1820.75	1662.54	gar2	nucleolar protein required for rRNA processing	I	1897523	1899025	+
SPCC1223.05c	1150.15	0.173132	0.0967391	1.78968	0.0735059	0.683746	1001.18	1160.68	1273.75	1164.98	rpl3702	60S ribosomal protein L37 (predicted)	III	1847518	1847853	-
SPAC227.13c	1268.25	-0.160822	0.0901793	-1.78335	0.0745287	0.6848	1252.01	1424.95	1170.76	1225.29	isu1	mitochondrial [2Fe-2S] cluster assembly protein Isu1	I	517865	518443	-
SPAC1399.04c	4116.03	-0.12007	0.0672777	-1.78469	0.0743118	0.6848	4468.44	4106.41	3759.06	4130.21	uck2	uracil phosphoribosyltransferase Uck2	I	1840621	1841283	+
SPBC32H8.12c	16792.8	0.0839241	0.0469864	1.78614	0.0740772	0.6848	15946.2	16661.9	17259.2	17303.9	act1	actin Act1	II	1476149	1477276	-
SPBC530.08	1028.91	0.163845	0.0920645	1.77968	0.0751286	0.685254	937.95	1002.89	1115.38	1059.44	SPBC530.08	DNA-binding transcription factor, membrane-tethered (predicted)	II	806834	809281	+
SPBC25B2.03	1694.88	0.131809	0.0741294	1.77809	0.0753888	0.685254	1613.48	1621.46	1763.43	1781.15	SPBC25B2.03	zf-C3HC4 type zinc finger	II	2602284	2604227	+
SPCC825.03c	1423.97	-0.142742	0.0802598	-1.7785	0.0753225	0.685254	1478.59	1510.14	1388.39	1318.77	psy1	plasma membrane SNARE Psy1	III	1028292	1029146	-
SPBC428.02c	8417.73	0.0902212	0.0507903	1.77635	0.0756755	0.685403	8033.7	8274.78	8543.14	8819.3	eca39	branched chain amino acid aminotransferase Eca39	II	442631	443914	-
SPBC23G7.10c	1030.79	0.167085	0.0941743	1.77421	0.0760289	0.686154	970.62	971.909	1151.33	1029.29	SPBC23G7.10c	NADH-dependent flavin oxidoreductase, implicated in cellular detoxification from family members (predicted)	II	2118267	2119454	-
SPAC3H8.04	622.548	0.196095	0.110828	1.76936	0.0768334	0.686839	568.039	592.439	672.336	657.377	SPAC3H8.04	DUF4210 domain protein, human FAM214A ortholog, implicated in chromosome segregation (predicted)	I	592743	593759	+
SPAC5D6.04	774.361	-0.180243	0.101898	-1.76886	0.0769173	0.686839	813.593	831.544	702.455	749.852	SPAC5D6.04	auxin family transmembrane transporter (predicted)	I	1505591	1507171	-
SPBC2D10.18	808.388	0.176627	0.0997742	1.77026	0.0766831	0.686839	763.007	755.069	882.198	833.28	abc1	ABC1 kinase family ubiquinone biosynthesis ATPase Abc1/Coq8	II	3001361	3003193	+
SPBC713.02c	2837.84	0.111339	0.0630921	1.76471	0.0776121	0.690611	2693.71	2762.78	2949.73	2945.13	ubp15	ubiquitin C-terminal hydrolase Ubp15	II	866540	870082	-
SPAC19D5.04	782.699	-0.180957	0.102735	-1.76139	0.0781732	0.693172	834.67	828.64	699.541	767.944	ptr1	HECT-type ubiquitin-protein ligase E3 Ptr1	I	5208776	5218459	+
SPBP8B7.03c	12062.6	0.0846759	0.0481395	1.75897	0.0785829	0.694377	11526.2	11890.4	12266.2	12567.6	rpl402	60S ribosomal protein L4 (predicted)	II	3636555	3637646	-
SPAC23C4.08	1225.45	-0.155181	0.0883864	-1.75571	0.0791373	0.696848	1243.57	1338.8	1206.71	1112.72	rho3	Rho family GTPase Rho3	I	1041535	1042550	+
SPBC2F12.05c	1413.52	0.14259	0.0815667	1.74814	0.0804396	0.705865	1384.79	1302.98	1451.55	1514.78	osh2	sterol transfer protein Osh2 (predicted)	II	1728834	1733137	+
SPAC22A12.15c	12201.5	0.0875597	0.0502336	1.74305	0.0813247	0.706299	12119.6	11543.8	12343	12799.7	bip1	ER heat shock protein BiP	I	1183312	1185303	-
SPAC3A11.07	4780.35	-0.0985389	0.0565208	-1.74341	0.0812622	0.706299	5017.51	4870.19	4703.44	4530.27	nde1	external mitochondrial NADH dehydrogenase (ubiquinone) Nde1/Nde2 (predicted)	I	3457273	3458928	+
SPBC1271.07c	787.484	0.174269	0.0998531	1.74525	0.0809408	0.706299	733.498	746.356	828.761	841.321	SPBC1271.07c	N-acetyltransferase (predicted)	II	358855	359346	+
SPBC4B4.08	1014.33	-0.165816	0.0954205	-1.73774	0.0822565	0.707127	1013.83	1130.67	930.778	982.044	ght2	plasma membrane glucose/fructose:proton symporter Ght2	II	3427572	3429167	+
SPBC1861.09	800.73	0.18856	0.108316	1.74083	0.081713	0.707127	784.084	713.443	912.318	793.074	ppk22	serine/threonine protein kinase Ppk22 (predicted)	II	4147656	4149236	+
SPCC1682.15	942.961	-0.167159	0.0961758	-1.73806	0.0822	0.707127	1035.96	959.325	859.852	916.709	mug122	PX/PXA domain protein	III	402249	404498	+
SPAC110.04c	8317.31	0.0854122	0.0493175	1.73188	0.0832944	0.710288	8060.05	8082.14	8489.7	8637.37	pss1	heat shock protein Pss1	I	1917998	1920160	-
SPAC1783.08c	3884.36	0.102565	0.0591706	1.73338	0.083029	0.710288	3665.38	3826.65	3981.55	4063.87	rpl1502	60S ribosomal protein L15b (predicted)	I	2203741	2204346	-
SPBC3E7.05c	1337.41	-0.141604	0.0818081	-1.73093	0.0834644	0.710288	1437.49	1368.8	1271.8	1271.53	mic60	MICOS complex subunit Mic60 (predicted)	II	2665666	2667395	-
SPCC777.02	706.454	0.184028	0.106491	1.72812	0.0839673	0.712178	648.134	674.722	778.239	724.722	SPCC777.02	DNA-binding transcription factor (predicted)	III	1599182	1601173	+
SPAC14C4.01c	1120.95	-0.149276	0.0865633	-1.72447	0.0846223	0.71534	1171.91	1185.85	1072.63	1053.41	SPAC14C4.01c	DUF1770 family protein	I	5225237	5225971	-
SPAC24H6.07	5042.48	0.110971	0.0646501	1.71649	0.0860725	0.715672	4587.52	5108.33	5082.36	5391.69	rps901	40S ribosomal protein S9	I	475493	476113	-
SPAC30D11.01c	569.516	-0.202728	0.117702	-1.72239	0.0849991	0.715672	619.679	599.215	502.309	556.86	gto2	alpha-glucosidase (predicted)	I	1120548	1123529	+
SPAC21E11.04	666.198	0.19485	0.113471	1.71717	0.0859476	0.715672	609.141	633.096	661.649	760.908	aca1	L-azetidine-2-carboxylic acid acetyltransferase Aca1	I	4254860	4255489	+
SPAC27D7.03c	3694.09	-0.262186	0.152599	-1.71814	0.0857712	0.715672	4457.9	3600.13	3320.87	3397.45	mei2	RNA-binding protein involved in meiosis Mei2	I	4511040	4513292	-
SPCC63.02c	931.938	-0.163251	0.0948599	-1.72097	0.0852559	0.715672	1015.94	953.516	864.71	893.59	aah3	alpha-amylase homolog Aah3	III	833966	835660	-
SPBC776.15c	2190.32	-0.121827	0.0711349	-1.71263	0.0867813	0.719207	2334.34	2231.33	2033.53	2162.11	kgd2	dihydrolipoamide S-succinyltransferase, e2 component of oxoglutarate dehydrogenase complex Kdg2 (predicted)	II	3206869	3208579	-
SPAPB8E5.03	4068.62	0.107275	0.0628352	1.70724	0.087778	0.725098	3809.76	4024.13	4065.11	4375.47	mae1	plasma membrane malate/succinate:proton symporter Mae1	I	4912297	4913613	+
SPBC11B10.04c	886.259	-0.16314	0.0958411	-1.70219	0.0887198	0.728134	930.573	941.9	815.159	857.404	mrps28	mitochondrial ribosomal protein subunit S28 (predicted)	II	1491955	1492821	-
SPBC32F12.11	67372.1	0.0845762	0.0496534	1.70333	0.0885059	0.728134	66706.2	64090.8	71952.6	66738.8	tdh1	glyceraldehyde-3-phosphate dehydrogenase Tdh1	II	2807637	2808647	+
SPBC19C2.09	1505.93	0.131325	0.0777752	1.68852	0.0913118	0.74699	1448.03	1426.89	1551.62	1597.2	sre1	DNA-binding transcription factor, sterol regulatory element binding protein Sre1	II	1691828	1694530	+
SPBP23A10.05	733.373	-0.179933	0.106725	-1.68595	0.0918055	0.748613	737.714	819.927	675.251	700.599	ssr4	SWI/SNF and RSC complex subunit Ssr4	II	2003716	2005099	+
SPCC417.15	2240.52	-0.536134	0.319147	-1.6799	0.0929774	0.75574	2118.29	3185.81	2001.46	1656.51	SPCC417.15	dubious	III	1702711	1702842	-
SPAC1420.01c	1871.29	0.121386	0.0725917	1.67217	0.0944901	0.755921	1830.58	1755.05	1963.57	1935.94	SPAC1420.01c	GATA-like domain protein (predicted)	I	1260973	1262760	-
SPAC2F3.05c	977.869	0.16796	0.100441	1.67223	0.0944792	0.755921	915.819	926.411	1116.35	952.894	SPAC2F3.05c	xylose and arabinose reductase (predicted)	I	3928809	3929636	-
SPBC887.17	1807.06	-0.13462	0.0802612	-1.67727	0.0934899	0.755921	1865.36	1916.71	1615.74	1830.4	SPBC887.17	nucleobase transmembrane transporter (predicted)	II	3576032	3577909	+
SPBC16C6.05	700.297	-0.179479	0.107201	-1.67422	0.0940868	0.755921	760.899	726.996	682.052	631.242	tma22	translation machinery associated protein ortholog Tma22 (predicted)	II	4335619	4336244	+
SPCC1919.15	553.136	-0.197758	0.118102	-1.67447	0.094039	0.755921	566.986	614.703	507.167	523.69	brl1	ubiquitin-protein ligase E3 Brl1	III	2239975	2242053	+
SPBC609.05	1183.06	-0.142631	0.0855375	-1.66747	0.0954211	0.760968	1220.39	1262.32	1105.66	1143.88	pob3	histone H2A-H2B chaperone, FACT complex subunit Pob3	II	3169409	3171006	+
SPAC2G11.13	824.032	-0.16923	0.101704	-1.66394	0.0961237	0.764168	898.957	846.064	810.301	740.805	atg22	vacuolar amino acid transmembrane transporter Atg22	I	836383	837972	+
SPAC1071.06	637.515	0.197184	0.118871	1.6588	0.097156	0.769961	614.41	574.046	738.404	623.201	arp9	SWI/SNF and RSC complex subunit Arp9	I	3866588	3868159	+
SPAC977.14c	6573.79	0.20023	0.121097	1.65347	0.0982344	0.776082	5611.89	6624.28	7161.55	6897.43	SPAC977.14c	aldo/keto reductase, predicted calcium channel regulator	I	59715	60770	-
SPBC31F10.02	785.748	0.170952	0.103659	1.64917	0.0991127	0.780589	729.283	749.261	875.397	789.053	SPBC31F10.02	acyl-CoA hydrolase (predicted)	II	3755933	3756418	+
SPAC6C3.02c	2157.7	-0.114389	0.0696601	-1.64211	0.100568	0.7896	2216.3	2270.05	2118.05	2026.41	mix17	mitochondrial CHCH domain protein Mix17 (predicted)	I	2324645	2325163	-
SPBP23A10.06	754.949	-0.181837	0.111295	-1.63383	0.102295	0.798214	804.108	800.567	644.16	770.96	mtm1	mitochondrial carrier, manganese ion Mtm1 (predicted)	II	2005968	2006975	+
SPBC26H8.03	8268.13	0.0807006	0.0493934	1.63383	0.102294	0.798214	8052.67	8021.15	8423.63	8575.05	cho2	phosphatidylethanolamine N-methyltransferase Cho2	II	3946061	3948778	+
SPAC20G4.07c	895.576	0.15462	0.0949395	1.62862	0.103394	0.799409	832.562	862.521	944.38	942.843	erg4	C-24(28) sterol reductase Erg4	I	4826683	4828044	-
SPBC29A3.04	13983.4	0.0769995	0.0472365	1.63008	0.103084	0.799409	13365.3	13854.5	14272.6	14441.2	rpl8	60S ribosomal protein L7a/L8 (predicted)	II	2045495	2046340	+
SPCC1840.03	1145.06	-0.142972	0.0877165	-1.62993	0.103116	0.799409	1237.25	1166.48	1066.8	1109.7	sal3	karyopherin/importin beta family nuclear import signal receptor Sal3	III	2260282	2263569	+
SPAC8E11.10	1091.62	0.146465	0.0904699	1.61893	0.105462	0.810042	1058.09	1014.5	1101.78	1192.12	SPAC8E11.10	sorbose reductase (predicted)	I	3373217	3373984	-
SPAC23A1.10	14795.4	0.0749606	0.0463378	1.6177	0.105727	0.810042	14573	14249.5	15034.3	15324.7	tef102	translation elongation factor EF-1 alpha Ef1a-b	I	4095202	4096584	+
[truncated: 4,815 more rows]
