# Supplementary material
Source: publisher figshare collection journal article supplement (https://gsajournals.figshare.com/articles/dataset/_/16837087)
Supplement: Supplementary file 2 [file 1]

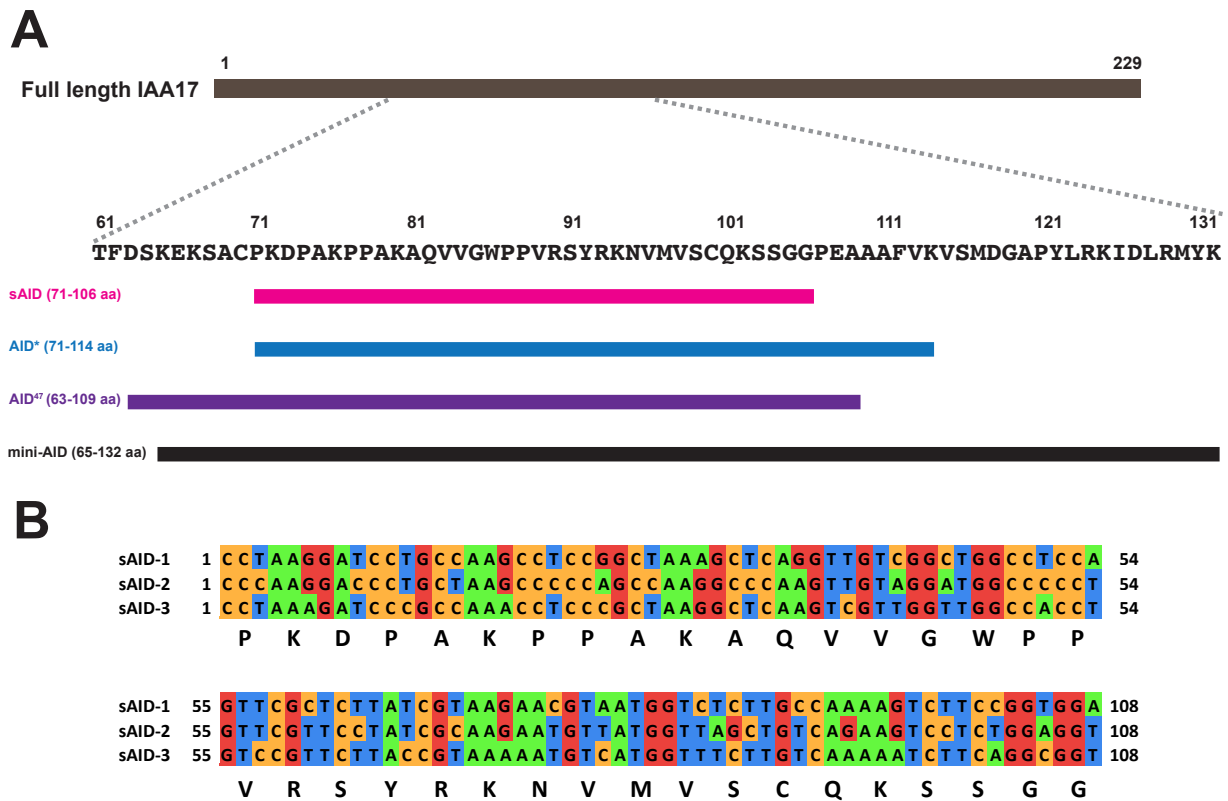

**Figure S4. The design of the 3×sAID degon.**

A. Sequence of amino acids 61-132 of IAA17 and bars depicting four AID variants (sAID, AID\*, AID<sup>47</sup>, and mini-AID) that correspond to parts of this region of IAA17.

B. Sequence alignment of the nucleotide sequences encoding the three copies of sAID in the 3×sAID degon. Synonymous variations were intentionally introduced to reduce the chance of recombination between copies.
