# Supplementary material
Source: publisher figshare collection journal article supplement (https://gsajournals.figshare.com/articles/dataset/_/16837087)
Supplement: Supplementary file 4 [file 1]

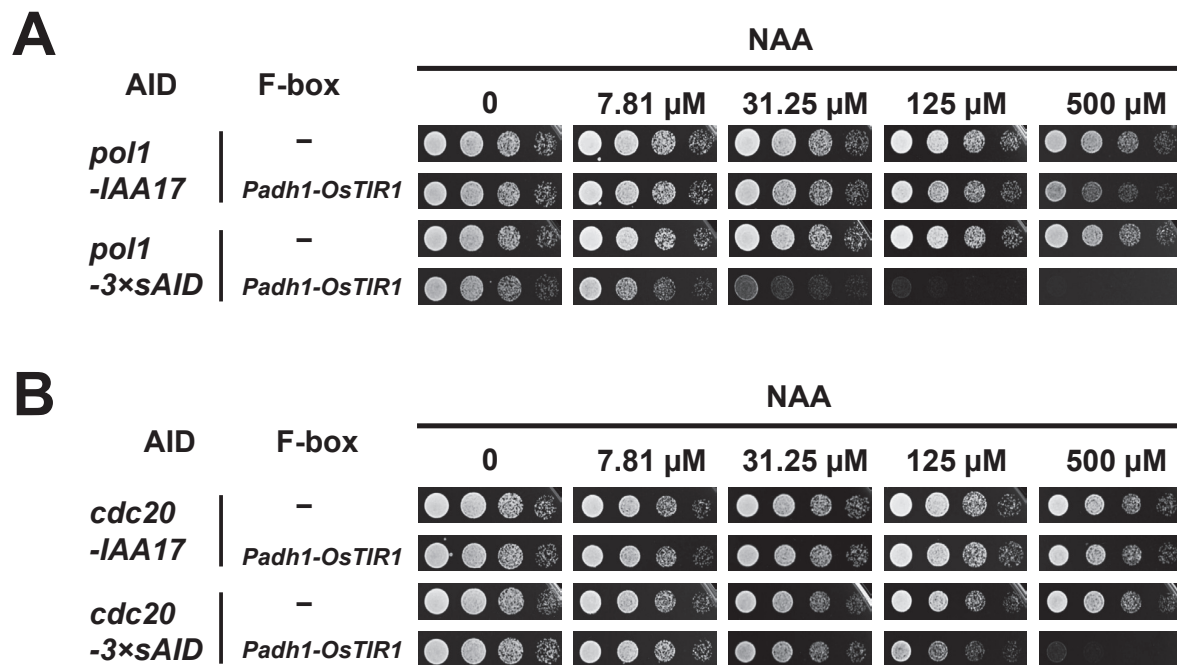

**Figure S5. The 3 $\times$ sAID degron is more effective than the full-length IAA17 for disrupting the functions of *pol1* and *cdc20*.**

A. Spot assay showed that when targeting the essential gene *pol1*, the 3 $\times$ sAID degron was more effective at causing NAA-dependent growth inhibition than the full-length IAA17.

B. Spot assay showed that when targeting the essential gene *cdc20*, the 3 $\times$ sAID degron was more effective at causing NAA-dependent growth inhibition than the full-length IAA17.
