# Supplementary material
Source: publisher figshare collection journal article supplement (https://gsajournals.figshare.com/articles/dataset/_/16837087)
Supplement: Supplementary file 5 [file 1]

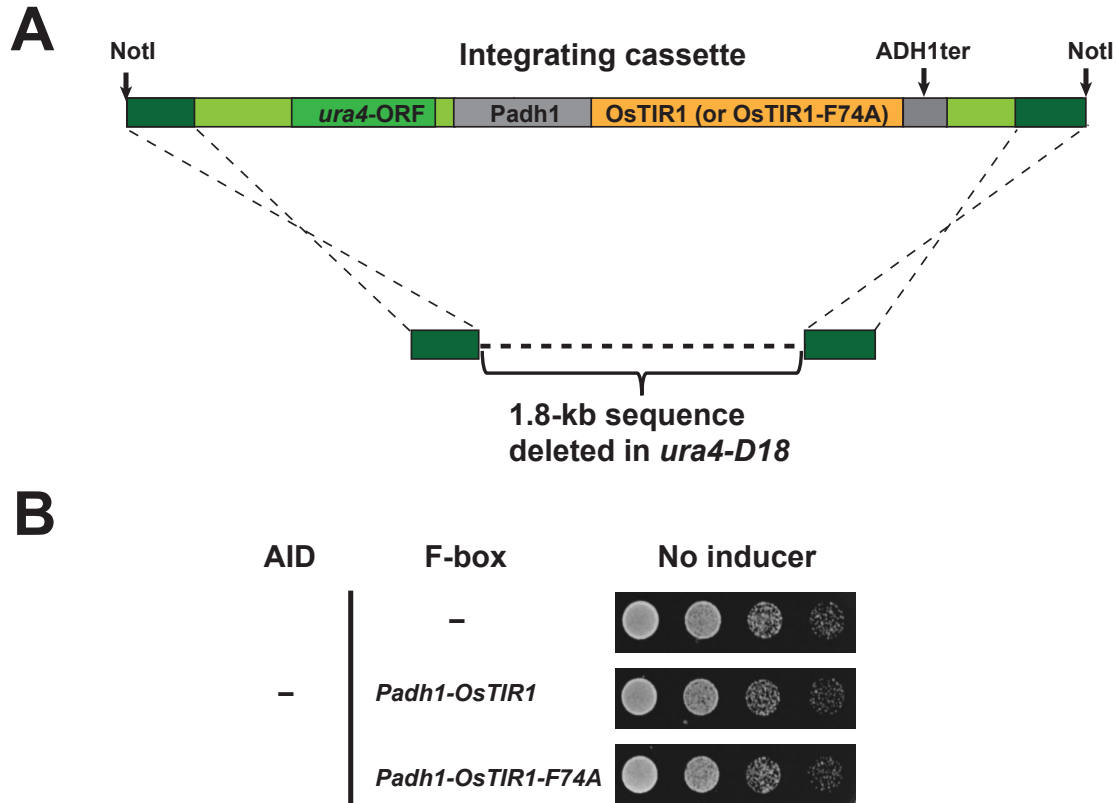

**Figure S2. Integrating cassettes expressing OsTIR1 and OsTIR1-F74A from the *Padh1* promoter and the lack of toxicity of OsTIR1 and OsTIR1-F74A expressed from the *Padh1* promoter.**

**A.** Schematic showing the integrating cassette *Padh1-OsTIR1* (or *Padh1-OsTIR1-F74A*) released from plasmid pDB5050 (or pDB4695) by NotI digestion and the integration of the cassette through ends-out recombination at the *ura4* locus of a *ura4-D18* strain. Sequences from the *ura4* locus of *S. pombe* genome are depicted in green color of different shades. The homology arm sequences are depicted in dark green. The *ura4* coding sequence is depicted in medium green. Sequences between a homology arm and the *ura4* coding sequence are depicted in light green. *S. pombe Padh1* promoter and the terminator of *S. cerevisiae ADH1* gene (*ADH1ter*) are depicted in grey. The codon-optimized coding sequence of *OsTIR1* (or *OsTIR1-F74A*) is depicted in yellow.

**B.** Spot assay showed that the *Padh1-OsTIR1* cassette and the *Padh1-OsTIR1-F74A* cassette, when integrated into the genome, did not cause any obvious growth phenotype in the absence of AID degen and inducer.
